# Supplementary material
Source: HighWire-hosted journal article supplement (http://dmd.aspetjournals.org/highwire/filestream/73932/field_highwire_adjunct_files/2/Cheong_et_al_Modelling_Supplemental_Data_File_2.xlsx)
Supplement: Cheong_et_al_Modelling_Supplemental_Data_File_2.xlsx [file Cheong_et_al_Modelling_Supplemental_Data_File_2.xlsx]

## Sheet: Summary
Simcyp Population Based Simulator
2019-07-23 15:23:21
Simcyp Version 17 (27/11/2017)
Input Parameters
Output Parameters
Input Parameters
Workspace	Recovered_Riva Vera DDI
Substrate	Rivaroxaban Denise Chua
Inhibitor 1	Verapamil Denise Chua
Inhibitor 1 Metabolite	SV-Norverapamil
Simulation Mode	PKPD Parameters + PKPD Profiles
ADAM LUA Scripting	Off
	Substrate	Inhibitor 1			Substrate	Inhibitor 1
Compound Name	Rivaroxaban Denise Chua	Verapamil Denise Chua		Absorption Model	ADAM	ADAM
Mol Weight (g/mol)	435.88	454.6		Permeability Assay	n/a	n/a
log P	1.5	4.46		Peff,man	Regional	Regional
Compound Type	Neutral	Monoprotic Base
pKa 1	n/a	8.78		Distribution Model	Full PBPK Model	Full PBPK Model
pKa 2	n/a	n/a		Vss	Predicted	Predicted
B/P	0.71	0.709		Prediction Method	Method 2	Method 2
Haematocrit	45	45
fu	0.065	0.09		Clearance Type	Enzyme Kinetics	Enzyme Kinetics
Trial Design
					Substrate	Inhibitor 1
Population Name	Sim-NEurCaucasian			Prandial State	Fed	n/a
Use Pop Representative	No			Route	Oral	Custom
Population Size	130			Dose Units	Dose (mg)	n/a
Number of Trials	10			Dose	20	n/a
No. of Subjects per Trial	13			Start Day/Time	Day 8, 09:00	n/a
Start Day/Time	Day 1, 09:00			Dosing Regimen	Single Dose	n/a
End Day/Time	Day 11, 09:00
Study Duration (h)	240
Sampling Time	Pre-defined Uniform
Sampling Site Selection	Off
Output Parameters
PKPD Parameters	Mean	Median	Geometric mean	Confidence Interval		Can be found in Excel sheet
CL (L/h)	7.00594	6.42804	6.51169	6.10287	6.9479	Clearance Trials SS
CLpo (L/h)	7.80136	6.97051	7.15142	6.66667	7.67143	Clearance Trials SS
fa (Sub)	0.955531	0.972134	0.953804	0.943452	0.96427	Clearance Trials SS
Fg (Sub)	0.991422	0.992323	0.991412	0.990642	0.992183	Clearance Trials SS
Fh (Sub)	0.963146	0.967618	0.962915	0.959214	0.966631	Clearance Trials SS
F (Sub)	0.912533	0.92965	0.910545	0.899731	0.921488	Clearance Trials SS
Vss (Subs)(L/Kg)	0.382325	0.378707	0.381596	0.377517	0.385719	Distribution - Vols
Rss	1.22887	1.20903	1.22559	1.21018	1.2412	Interaction Trials SS
PKPD Profiles	Mean	Median	Geometric mean	Confidence Interval		Can be found in Excel sheet
CMax (ng/mL)	281.138	268.001	269.937	256.799	283.748	AUC
TMax (h)	3.15485	3.05306	3.07342	2.95389	3.19778	AUC
AUC (ng/mL.h)	2846.15	2718.47	2632.98	2455.31	2823.5	AUC
AUC ratio	1.31371	1.28625	1.30631	1.28274	1.33031	AUC
CMax ratio	1.12007	1.11227	1.1189	1.11011	1.12776	AUC
CMax inh (ng/mL)	314.428	297.668	302.032	287.4	317.408	AUC
Tmax inh(h)	3.48512	3.36102	3.393	3.25847	3.53308	AUC
AUCinh (ng/mL.h)	3728.75	3588.3	3439.49	3200.05	3696.84	AUC
fa (Subs)	0.899497	0.917629	0.89663	0.884057	0.909382	Overall Fa Fg
fa inh (Subs)	0.899541	0.917629	0.896683	0.884131	0.909414	Overall Fa Fg
Fg (Subs)	0.995648	0.996123	0.995645	0.995253	0.996037	Overall Fa Fg
Fg inh (Subs)	0.997169	0.997801	0.997167	0.996846	0.997489	Overall Fa Fg
CL (Dose/AUC)(L/h)	8.27532	7.3571	7.59596	7.08342	8.1456	AUC
CL inh (Dose/AUC)(L/h)	6.3932	5.57367	5.81482	5.41003	6.2499	AUC
ADAM / M-ADAM	Precipitation					Can be found in Excel sheet
Substrate	No					ADAM Profiles (Sub)
Inhibitor 1	Yes					ADAM Profiles (Inh 1)

## Sheet: Input Sheet
Simcyp Population Based Simulator
2019-07-23 15:23:22
Simcyp Version 17 (27/11/2017)
Substrate		Inhibitor 1			Inh 1 Metabolite			Trial Design			Software Version Detail
Compound Name	Rivaroxaban Denise Chua	Compound Name	Verapamil Denise Chua		Compound Name	SV-Norverapamil		Use Pop Representative	No		Simulation Duration(seconds)	13813
Version number	Not applicable	Version number	Not applicable		Version number	17.0.0		Population Size	130		Windows Version	Windows 10
Molecule Type	Small Molecule	Molecule Type	Small Molecule					Number of Trials	10		Excel Version	Excel 2016
Route	Oral	Route	Custom		PhysChem and Blood Binding			No of Subjects per Trial	13		Source File Location	C:\Program Files\Simcyp\Simcyp Simulator V17\Screens\
Dose Units	Dose (mg)							Population name	Sim-NEurCaucasian		Excel Embedded Workspace	No
Dose	20	PhysChem and Blood Binding			Mol Weight (g/mol)	440.575		Version number	17.0.0		Simcyp.exe
Start Day	8				log P	4.66		Minimum Age (years)	38		File Version	17.0.90.0
Start Time	9h0m	Mol Weight (g/mol)	454.6		Compound Type	Monoprotic Base		Maximum Age (years)	72		Date Modified	27/11/2017
Dosing Regimen	Single Dose	log P	4.46		pKa 1	10.29		Propn. of Females	0.4		File Size (bytes)	3236864
		Compound Type	Monoprotic Base		BP input type	User		Fix Individual Trial Design	No		Simcyp.UI.Common.dll
PhysChem and Blood Binding		pKa 1	8.78		B/P	0.675		Prandial State	Fed		File Version	15.0.0.0
		BP input type	User		Haematocrit	45		Fluid intake with dose (mL)	250		Date Modified	27/11/2017
Mol Weight (g/mol)	435.88	B/P	0.709		fu Input	User		Fluid intake with dose CV (%)	30		File Size (bytes)	1980416
log P	1.5	Haematocrit	45		fu	0.083		PKPD Parameters	On		Simcyp.ViewModel.Animal.dll
Compound Type	Neutral	fu Input	User		Reference Binding Component	HSA		PKPD Profiles	On		File Version	15.0.0.0
BP input type	User	fu	0.09		Protein Reference Conc (g/L)	45		Start Day/Time	Day 1, 09:00		Date Modified	27/11/2017
B/P	0.71	Reference Binding Component	HSA		% Bound to Lipoprotein	0		End Day/Time	Day 11, 09:00		File Size (bytes)	102912
Haematocrit	45	Protein Reference Conc (g/L)	45		% Bound to Lipoprotein (CV %)	0		Study Duration (h)	240		Simcyp.ViewModel.Common.dll
fu Input	User	% Bound to Lipoprotein	0								File Version	17.0.90.0
fu	0.065	% Bound to Lipoprotein (CV %)	0		Absorption			Sub : Route	Oral		Date Modified	27/11/2017
Reference Binding Component	HSA							Inh 1 : Route	Custom		File Size (bytes)	510976
Protein Reference Conc (g/L)	45	Absorption			fu(Gut)	1					simcyp.ViewModel.dll
% Bound to Lipoprotein	0							Random Generator	Mersenne Twister (MT19937)		File Version	17.0.90.0
% Bound to Lipoprotein (CV %)	0	Absorption Model	ADAM		Distribution			Seed	Fixed		Date Modified	27/11/2017
		Input type	Predicted					Seed Value	1		File Size (bytes)	605696
Absorption		fa	0.996753		Distribution Model	Minimal PBPK Model					simcyp.model.XmlSerializers.dll
		ka (1/h)	2.65694		SAC kin (1/h)	0		Solver sampling interval (h)	0.05		File Version	15.0.6540.37905
Absorption Model	ADAM	fu(Gut) input type	User		SAC kout (1/h)	0		Sampling Time	Pre-defined Uniform		Date Modified	27/11/2017
Input type	Predicted	fu(Gut)	1		SAC CLin (L/h)	0		Number of time samples	200		File Size (bytes)	4730880
fa	0.967159	Peff,man Type	Global		SAC CLout (L/h)	0					simcyp.model.dll
ka (1/h)	1.31891	Peff,man (10-4 cm/s)	6.08477		SAC Q (L/h)	18		Sampling Site Selection	Off		File Version	17.0.90.0
fu(Gut) input type	User	Permeability Assay	PCaco-2		Volume [Vsac] (L/kg)	2					Date Modified	27/11/2017
fu(Gut)	0.21	Apical pH : Basolateral pH	7.4 : 7.4		Vss input type	Predicted		AUC Calculations (Substrate)			File Size (bytes)	5249024
Peff,man Type	Global	Activity	Passive		Vss (L/kg)	4.16681		Calculated AUCt first dose	Yes
Peff,man (10-4 cm/s)	3.02049	PCaco-2(10E-06 cm/s)	149.6		Prediction Method	Method 1 (Poulin and Theil)		Calculated AUC_INF	Yes		Licence Details
Permeability Assay	PCaco-2	Reference Compound	Propranolol		Concentration-dependent volume	No		Calculated AUCt last dose	No
Apical pH : Basolateral pH	7.4 : 7.4	Reference Compound Value (10E-06 cm/s)	109		log Po:w	4.66		Integrated AUCt first dose	Yes		User name	NUSSTU\e0013222
Activity	Passive	Scalar	0.394495		Ka,AP input type	Predicted		Integrated AUCt last dose	No		Domain name	stf.nus.edu.sg
PCaco-2(10E-06 cm/s)	21.8	Degradation Rate Stomach (1/h)	0		Ka,AP ((mg/g)-1)	2.9021		Integrated AUCt user interval	No		Computer name	MPRG-5810
Reference Compound	Multiple	Degradation Rate Duodenum (1/h)	0		fut input type	Predicted		Method	Linear Trapezoidal		Simcyp Standard licence: agreement identifier
Reference Compound Value (10E-06 cm/s)	0	Degradation Rate Jejunum I (1/h)	0		fut	0.153278					Simcyp Standard licence: agreement type	Academic research
Scalar	1.28408	Degradation Rate Jejunum II (1/h)	0		logDvo:w (pH=7.4) input type	Predicted		AUC Calculations (Inhibitor 1)			Simcyp Standard licence: organisation	National University of Singapore
Degradation Rate Stomach (1/h)	0	Degradation Rate Ileum I (1/h)	0		logDvo:w (pH=7.4)	0.955341		Calculated AUCt first dose	No		Simcyp Standard licence: machine identifier	4C4C4544-0043-5210-8037-C3C04F304A32
Degradation Rate Duodenum (1/h)	0	Degradation Rate Ileum II (1/h)	0		logP vo:w input type	Predicted		Calculated AUC_INF	No		Simcyp Standard licence: source	Desktop
Degradation Rate Jejunum I (1/h)	0	Degradation Rate Ileum III (1/h)	0		logP vo:w Prediction Method	Hansch		Calculated AUCt last dose	No		Simcyp Standard licence: usage	Client
Degradation Rate Jejunum II (1/h)	0	Degradation Rate Ileum IV (1/h)	0		logP vo:w Hansch a	1.115		Integrated AUCt first dose	No		Simcyp Standard licence: issued	Fri Aug 10 14:47:39 2018
Degradation Rate Ileum I (1/h)	0	Degradation Rate Colon (1/h)	0		logP vo:w Hansch b	-1.35		Integrated AUCt last dose	Yes		Simcyp Standard licence: valid from	Mon Jul 30 16:00:00 2018
Degradation Rate Ileum II (1/h)	0	Input Form	Solid Formulation		logP vo:w	3.8459		Integrated AUCt user interval	No		Simcyp Standard licence: valid to	Wed Jul 31 15:59:59 2019
Degradation Rate Ileum III (1/h)	0	Formulation	CR: Monolith: Release Profile		Compound Type	Monoprotic Base		Method	Linear Trapezoidal
Degradation Rate Ileum IV (1/h)	0	Triggering pH	0		pKa 1	10.29
Degradation Rate Colon (1/h)	0	CR/MR Input	Discrete		Adipose input type	Predicted		AUC Calculations (Inh 1 Metabolite)
Input Form	Solid Formulation	Time (h) 1	0		Adipose	0.0362954		Calculated AUCt first dose	No
Formulation	Immediate Release (IR)	Release Mean (%) 1	0		Bone input type	Predicted		Calculated AUC_INF	No
Define Disintegration Profile	Not activated	CV (%) 1	0		Bone	16.8724		Calculated AUCt last dose	No
Dissolution Type	Solubility	Time (h) 2	1		Brain input type	Predicted		Integrated AUCt first dose	No
Solubility pH Type	Intrinsic	Release Mean (%) 2	9.72		Brain	15.4364		Integrated AUCt last dose	Yes
Solubility (mg/mL)	0.01	CV (%) 2	10		Gut input type	Predicted		Integrated AUCt user interval	No
pH Surface Calculation	Off	Time (h) 3	4		Gut	12.1776		Method	Linear Trapezoidal
Precipitation Model	Model 2	Release Mean (%) 3	11		Heart input type	Predicted
PRC (Precipitation Rate Constant)	Global	CV (%) 3	10		Heart	3.7623		Memory Size	4000000
PRC (1/h)	4	Time (h) 4	6		Kidney input type	Predicted		Solubility Cap (mg/mL)	500
CSR (Critical Supersaturation Ratio)	Global	Release Mean (%) 4	20		Kidney	5.82248		Differential Solver	5th-order Runge-Kutta
CSR value	1000	CV (%) 4	10		Liver input type	Predicted		Maximum number of steps	1000000
Reference Concentration for Precipitation Model	Total	Time (h) 5	8		Liver	9.63175		Relative Tolerance	1e-15
Secondary Precipation Rate Constant (1/h)	4	Release Mean (%) 5	28		Lung input type	Predicted		Relative Tolerance when ADAM is used	1e-09
Dispersion Type	Monodispersed	CV (%) 5	10		Lung	1.31906		Integration error tolerance	0.001
Radius (µm)	10	Time (h) 6	10		Muscle input type	Predicted
DLM Scalar	All Segments	Release Mean (%) 6	39		Muscle	5.91242		Use UBL fluid volumes	Off
DLM Scalar values	1	CV (%) 6	10		Skin input type	Predicted		Apply Minimum Mass Limit(ADAM)	Off
Particle density (g/mL)	1.2	Time (h) 7	12		Skin	7.21972		Minimum Mass Limit	n/a
Viscosity Model	Off	Release Mean (%) 7	45		Spleen input type	Predicted		Minimum Norm. Scalar (pH surface model)	1e-11
Viscosity Model Exponent	0.987	CV (%) 7	10		Spleen	5.93148		Newton Convergence Tol (pH surface model)	1e-14
Diffusion coeff. input type	Predicted	Time (h) 8	14		Pancreas input type	Predicted		Time Interval (pH surface model)	0.01
Diffusion coeff, ionised (10-4 cm2/min)	3.96174	Release Mean (%) 8	47.5		Pancreas	9.95709
Diffusion coeff, micelle (10-4 cm2/min) mean	0.78	CV (%) 8	10		Kp Scalar	1		LUA Scripting(ADAM)	Off
Diffusion coeff, micelle CV (%)	20	Time (h) 9	24		Smoothing Function	Off
Diffusion coeff. (10E-4 cm²/min)	3.96174	Release Mean (%) 9	55		Lipid Binding Scalar	1		Paediatric Module	Not Loaded
heff method selected	Hintz-Johnson	CV (%) 9	10		Use Pvo:w for Neutral Lipid Partition in All Tissues	No		No. Differential Equations	221
heff cut-off type	Default	Interpolation Approach	Piecewise Cubic Polynomial
heff cut-off value (µm)	30	Define Disintegration Profile	Not activated		Elimination
Bile Micelle mediated solubilisation	On	Dissolution Type	Solubility
Bile solubilisation input type	User	Solubility pH Type	Intrinsic		Clearance Type	Enzyme Kinetics
User logKm:w,neutral	3.5	Solubility (mg/mL)	0.022		FI Correction	Not used
User logKm:w,ion	1.4	pH Surface Calculation	Off		PLR Correction	Not Used
Absorption Scalars (no units)	SI Global	Precipitation Model	Model 2		In vitro metabolic system	Recombinant
Absorption Scalar SI Global	1	PRC (Precipitation Rate Constant)	Global
Absorption Scalar Colon	1	PRC (1/h)	4		Pathway	D-620
Segregated transit time model	Not activated	CSR (Critical Supersaturation Ratio)	Global		Enzyme	CYP2C8
		CSR value	10		Vmax (pmol/min/pmol)	38.5
Distribution		Reference Concentration for Precipitation Model	Total		Km (μM)	68
		Secondary Precipation Rate Constant (1/h)	4		fu mic	1
Distribution Model	Full PBPK Model	Solubility Factor 1	1000		Alpha	1
Replacement Organ?	No	Dispersion Type	Monodispersed		Beta	1
Organ Replaced	n/a	Radius (µm)	10
User-defined Additional Organ	No	DLM Scalar	All Segments		Pathway	D-620
Type	n/a	DLM Scalar values	1		Enzyme	CYP3A4
Vss input type	Predicted	Particle density (g/mL)	1.2		Vmax (pmol/min/pmol)	46
Vss (L/kg)	0.382414	Viscosity Model	Off		Km (μM)	90
Prediction Method	Method 2 (Rodgers et al)	Viscosity Model Exponent	0.987		fu mic	1
Concentration-dependent volume	No	Diffusion coeff. input type	Predicted		Alpha	1
log Po:w	1.5	Diffusion coeff, ionised (10-4 cm2/min)	3.8857		Beta	1
logP vo:w input type	Predicted	Diffusion coeff, micelle (10-4 cm2/min) mean	0.78
logP vo:w Prediction Method	Hansch	Diffusion coeff, micelle CV (%)	20		Pathway	D-620
logP vo:w Hansch a	1.115	Diffusion coeff. (10E-4 cm²/min)	3.8857		Enzyme	CYP3A5
logP vo:w Hansch b	-1.35	heff method selected	Hintz-Johnson		Vmax (pmol/min/pmol)	18.8
logP vo:w	0.3225	heff cut-off type	Default		Km (μM)	19.5
Compound Type	Neutral	heff cut-off value (µm)	30		fu mic	1
Adipose input type	Predicted	Bile Micelle mediated solubilisation	On		Alpha	1
Adipose	0.402093	Bile solubilisation input type	User		Beta	1
Bone input type	Predicted	User logKm:w,neutral	1
Bone	0.50091	User logKm:w,ion	0		Pathway	D-715
Brain input type	Predicted	Absorption Scalars (no units)	SI Global		Enzyme	CYP2C8
Brain	0.506596	Absorption Scalar SI Global	1		Vmax (pmol/min/pmol)	113.2
Gut input type	Predicted	Absorption Scalar Colon	1		Km (μM)	59
Gut	0.633996	Segregated transit time model	Not activated		fu mic	1
Heart input type	Predicted				Alpha	1
Heart	0.510654	Distribution			Beta	1
Kidney input type	Predicted
Kidney	0.508376	Distribution Model	Full PBPK Model		Use Allelic variants for Enzyme 1	No
Liver input type	Predicted	Replacement Organ?	No		Enzyme	CYP2C9
Liver	0.629583	Organ Replaced	n/a
Lung input type	Predicted	User-defined Additional Organ	No		Use Allelic variants for Enzyme 2	No
Lung	0.485028	Type	n/a		Enzyme	CYP1A2
Muscle input type	Predicted	Vss input type	Predicted
Muscle	0.347033	Vss (L/kg)	5.36617		Ontogeny Profile	No Profile Used
Skin input type	Predicted	Prediction Method	Method 2 (Rodgers et al)		Biliary CLint (Hep) (µL/min/106)	0
Skin	0.442872	Concentration-dependent volume	No		CV Biliary CLint (Hep) (%)	30
Spleen input type	Predicted	log Po:w	4.46		Ontogeny Profile	No Profile Used
Spleen	0.654137	Ka,AP input type	Predicted		Active Uptake into Hepatocyte	1
Pancreas input type	Predicted	Ka,AP ((mg/g)-1)	0		CL R (L/h)	1.91
Pancreas	0.433342	logP vo:w input type	Predicted
Kp Scalar	2.2	logP vo:w Prediction Method	Hansch		CYPs and/or UGTs Interaction
Smoothing Function	Off	logP vo:w Hansch a	1.115
Lipid Binding Scalar	1	logP vo:w Hansch b	-1.35		Enzyme	CYP3A4
Use Pvo:w for Neutral Lipid Partition in All Tissues	No	logP vo:w	3.6229		Ki (µM)	0.27
		Compound Type	Monoprotic Base		fu mic	0.78
Elimination		pKa 1	8.78		MBI Kapp (µM)	0.284
		Adipose input type	Predicted		MBI Kinact (1/h)	2.44
Clearance Type	Enzyme Kinetics	Adipose	11.9712		MBI fu mic	0.78
FI Correction	Not used	Bone input type	Predicted
PLR Correction	Not Used	Bone	7.80499		Enzyme	CYP3A5
In vitro metabolic system	Recombinant	Brain input type	Predicted		MBI Kapp (µM)	4.53
		Brain	7.21623		MBI Kinact (1/h)	4.2
Pathway	Pathway 1	Gut input type	Predicted		MBI fu mic	1
Enzyme	CYP3A4	Gut	5.69017
CLint (µL/min/pmol)	0.0635371	Heart input type	Predicted		Co-administration of Multiple Inducers/Suppressors	Default
fu mic	1	Heart	1.83823		Co-administration of Multiple UGT Inducers/Suppressors	Default
		Kidney input type	Predicted
Pathway	Pathway 1	Kidney	2.79084
Enzyme	CYP2J2	Liver input type	Predicted
CLint (µL/min/pmol)	5.68542	Liver	4.54429
fu mic	1	Lung input type	Predicted
		Lung	0.725572
Use Allelic variants for Enzyme 1	No	Muscle input type	Predicted
Enzyme	CYP2C9	Muscle	2.85237
		Skin input type	Predicted
Use Allelic variants for Enzyme 2	No	Skin	3.3729
Enzyme	CYP1A2	Spleen input type	Predicted
		Spleen	2.85138
Additional HLM CLint (μL/min/mg protein)	7.9988	Pancreas input type	Predicted
Additional HLM CV (%)	30	Pancreas	4.70595
Additional HLM fumic	1	Kp Scalar	1
Ontogeny Profile	No Profile Used	Smoothing Function	Off
Biliary CLint (Hep) (µL/min/106)	0	Lipid Binding Scalar	1
CV Biliary CLint (Hep) (%)	30	Use Pvo:w for Neutral Lipid Partition in All Tissues	No
Ontogeny Profile	No Profile Used
Percentage available for re-absorption (%)	100	Elimination
Active Uptake into Hepatocyte	1
CL R (L/h)	3.1	Clearance Type	Enzyme Kinetics
		FI Correction	Not used
		PLR Correction	Not Used
		In vitro metabolic system	Recombinant
Transport		Pathway	Norverapamil
		Enzyme	CYP2C8
Active transport Papp-to-Peff correlation	Predicted	Vmax (pmol/min/pmol)	221.2
Active transport Papp-to-Peff correlation Slope	0.939	Km (μM)	140.5
Active transport Papp-to-Peff correlation Intercept	-0.8787	fu mic	1
		Forms Metabolite	Pri Met 1
Assume Colon SS	No
Organ/Tissue	Gut	Pathway	Norverapamil
Transporter	ABCB1 (P-gp/MDR1)	Enzyme	CYP3A4
Location	Apical	Vmax (pmol/min/pmol)	154.3
Function	Efflux	Km (μM)	122
Jmax (pmol/min)	37.83	fu mic	1
Km (µM)	9.416	Forms Metabolite	Pri Met 1
fuinc	1
A (cm²)	0.33	Pathway	Norverapamil
System	MDCK	Enzyme	CYP3A5
RAF/REF	1.5	Vmax (pmol/min/pmol)	169.3
		Km (μM)	87.5
		fu mic	1
		Forms Metabolite	Pri Met 1
		Pathway	D-617
		Enzyme	CYP2C8
		Vmax (pmol/min/pmol)	218.9
		Km (μM)	156
		fu mic	1
		Pathway	D-617
		Enzyme	CYP3A4
		Vmax (pmol/min/pmol)	174
		Km (μM)	99.5
		fu mic	1
		Pathway	D-617
		Enzyme	CYP3A5
		Vmax (pmol/min/pmol)	117.7
		Km (μM)	73
		fu mic	1
		Use Allelic variants for Enzyme 1	No
		Enzyme	CYP2C9
		Use Allelic variants for Enzyme 2	No
		Enzyme	CYP1A2
		Additional HLM CLint (μL/min/mg protein)	79.57
		Additional HLM CV (%)	30
		Additional HLM fumic	1
		Ontogeny Profile	No Profile Used
		Biliary CLint (Hep) (µL/min/106)	0
		CV Biliary CLint (Hep) (%)	30
		Ontogeny Profile	No Profile Used
		Percentage available for re-absorption (%)	100
		Active Uptake into Hepatocyte	1
		CL R (L/h)	2.52
		CYPs and/or UGTs Interaction
		Enzyme	CYP3A4
		Ki (µM)	0.4871
		fu mic	0.67
		MBI Kapp (µM)	1.653
		MBI Kinact (1/h)	3.924
		MBI fu mic	0.67
		Enzyme	CYP3A5
		MBI Kapp (µM)	3.99
		MBI Kinact (1/h)	1.84
		MBI fu mic	1
		Co-administration of Multiple Inducers/Suppressors	Default
		Co-administration of Multiple UGT Inducers/Suppressors	Default
		Transport
		Active transport Papp-to-Peff correlation	Predicted
		Active transport Papp-to-Peff correlation Slope	0.939
		Active transport Papp-to-Peff correlation Intercept	-0.8787
		Assume Colon SS	No
		Organ/Tissue	Gut
		Transporter	ABCB1 (P-gp/MDR1)
		Location	Apical
		Function	Efflux
		Jmax (pmol/min)	2.814
		Km (µM)	0.734
		fuinc	1
		A (cm²)	1
		System	User
		RAF/REF	0.608
		Transporter	ABCC2 (MRP2)
		Location	Apical
		Function	Efflux
		CLint,T (µL/min)	18
		fuinc	1
		A (cm²)	1
		System	User
		RAF/REF	1

## Sheet: Ode State Info
Index	Model	State variable name (no PK interaction)	State variable name (PK interaction)
0	0	Substrate amount in dosed absorption compartment	Substrate amount in dosed absorption compartment
1	0	Substrate liver concentration	Substrate liver concentration
2	0	Substrate systemic concentration	Substrate systemic concentration
3	0	Substrate renal amount excreted	Substrate renal amount excreted
4	0	Substrate adipose concentration	Substrate adipose concentration
5	0	Substrate arterial blood concentration	Substrate arterial blood concentration
6	0	Substrate bone concentration	Substrate bone concentration
7	0	Substrate brain concentration	Substrate brain concentration
8	0	Substrate heart concentration	Substrate heart concentration
9	0	Substrate gi tract (tissue) concentration	Substrate gi tract (tissue) concentration
10	0	Substrate kidney concentration	Substrate kidney concentration
11	0	Substrate lung concentration	Substrate lung concentration
12	0	Substrate muscle concentration	Substrate muscle concentration
13	0	Substrate spleen concentration	Substrate spleen concentration
14	0	Substrate skin concentration	Substrate skin concentration
15	0	Substrate additional organ concentration	Substrate additional organ concentration
16	0	Substrate feto-placental concentration	Substrate feto-placental concentration
17	0	Substrate pancreas concentration	Substrate pancreas concentration
18	0	Substrate lymph concentration	Substrate lymph concentration
19	0	CYP2C8 amount in gut	Inhibitor 1 amount in dosed absorption compartment
20	0	CYP2C8 amount in colon	Inhibitor 1 liver concentration
21	0	CYP2C8 amount in liver	Inhibitor 1 systemic concentration
22	0	CYP2C8 amount in kidney	Inhibitor 1 renal amount excreted
23	0	CYP2J2 amount in gut	Inhibitor 1 adipose concentration
24	0	CYP2J2 amount in colon	Inhibitor 1 arterial blood concentration
25	0	CYP2J2 amount in liver	Inhibitor 1 bone concentration
26	0	CYP2J2 amount in kidney	Inhibitor 1 brain concentration
27	0	CYP3A4 amount in gut	Inhibitor 1 heart concentration
28	0	CYP3A4 amount in colon	Inhibitor 1 gi tract (tissue) concentration
29	0	CYP3A4 amount in liver	Inhibitor 1 kidney concentration
30	0	CYP3A4 amount in kidney	Inhibitor 1 lung concentration
31	0	CYP3A5 amount in gut	Inhibitor 1 muscle concentration
32	0	CYP3A5 amount in colon	Inhibitor 1 spleen concentration
33	0	CYP3A5 amount in liver	Inhibitor 1 skin concentration
34	0	CYP3A5 amount in kidney	Inhibitor 1 additional organ concentration
35	0	Substrate secreted from gall bladder amount	Inhibitor 1 feto-placental concentration
36	0	Substrate gall bladder amount	Inhibitor 1 pancreas concentration
37	0	Inhibitor 1 secreted from gall bladder amount	Inhibitor 1 lymph concentration
38	0	Inhibitor 1 gall bladder amount	Inh 1 Metabolite amount in absorption compartment
39	0	CYP2J2 amount in Stomach	Inh 1 Metabolite liver concentration
40	0	CYP2J2 amount in Duodenum	Inh 1 Metabolite systemic concentration
41	0	CYP2J2 amount in Jejunum I	Inh 1 Metabolite kidney concentration
42	0	CYP2J2 amount in Jejunum II	Inh 1 Metabolite renal amount excreted
43	0	CYP2J2 amount in Ileum I	Inh 1 Metabolite SAC concentration
44	0	CYP2J2 amount in Ileum II	CYP2C8 amount in gut
45	0	CYP2J2 amount in Ileum III	CYP2C8 amount in colon
46	0	CYP2J2 amount in Ileum IV	CYP2C8 amount in liver
47	0	CYP2J2 amount in Colon	CYP2C8 amount in kidney
48	0	CYP3A4 amount in Stomach	CYP2J2 amount in gut
49	0	CYP3A4 amount in Duodenum	CYP2J2 amount in colon
50	0	CYP3A4 amount in Jejunum I	CYP2J2 amount in liver
51	0	CYP3A4 amount in Jejunum II	CYP2J2 amount in kidney
52	0	CYP3A4 amount in Ileum I	CYP3A4 amount in gut
53	0	CYP3A4 amount in Ileum II	CYP3A4 amount in colon
54	0	CYP3A4 amount in Ileum III	CYP3A4 amount in liver
55	0	CYP3A4 amount in Ileum IV	CYP3A4 amount in kidney
56	0	CYP3A4 amount in Colon	CYP3A5 amount in gut
57	0	CYP3A5 amount in Stomach	CYP3A5 amount in colon
58	0	CYP3A5 amount in Duodenum	CYP3A5 amount in liver
59	0	CYP3A5 amount in Jejunum I	CYP3A5 amount in kidney
60	0	CYP3A5 amount in Jejunum II	Substrate secreted from gall bladder amount
61	0	CYP3A5 amount in Ileum I	Substrate gall bladder amount
62	0	CYP3A5 amount in Ileum II	Inhibitor 1 secreted from gall bladder amount
63	0	CYP3A5 amount in Ileum III	Inhibitor 1 gall bladder amount
64	0	CYP3A5 amount in Ileum IV	CYP2J2 amount in Stomach
65	0	CYP3A5 amount in Colon	CYP2J2 amount in Duodenum
66	0	Water volume in Stomach	CYP2J2 amount in Jejunum I
67	0	Water volume in Duodenum	CYP2J2 amount in Jejunum II
68	0	Water volume in Jejunum I	CYP2J2 amount in Ileum I
69	0	Water volume in Jejunum II	CYP2J2 amount in Ileum II
70	0	Water volume in Ileum I	CYP2J2 amount in Ileum III
71	0	Water volume in Ileum II	CYP2J2 amount in Ileum IV
72	0	Water volume in Ileum III	CYP2J2 amount in Colon
73	0	Water volume in Ileum IV	CYP3A4 amount in Stomach
74	0	Water volume in Colon	CYP3A4 amount in Duodenum
75	0	Sub solid amount in faeces	CYP3A4 amount in Jejunum I
76	0	Sub dissolved amount in faeces	CYP3A4 amount in Jejunum II
77	0	Sub unreleased amount in faeces	CYP3A4 amount in Ileum I
78	0	Sub solid amount in Stomach bin 0	CYP3A4 amount in Ileum II
79	0	Sub solid amount in Duodenum bin 0	CYP3A4 amount in Ileum III
80	0	Sub solid amount in Jejunum I bin 0	CYP3A4 amount in Ileum IV
81	0	Sub solid amount in Jejunum II bin 0	CYP3A4 amount in Colon
82	0	Sub solid amount in Ileum I bin 0	CYP3A5 amount in Stomach
83	0	Sub solid amount in Ileum II bin 0	CYP3A5 amount in Duodenum
84	0	Sub solid amount in Ileum III bin 0	CYP3A5 amount in Jejunum I
85	0	Sub solid amount in Ileum IV bin 0	CYP3A5 amount in Jejunum II
86	0	Sub solid amount in Colon bin 0	CYP3A5 amount in Ileum I
87	0	Sub dissolved amount in Stomach bin 0	CYP3A5 amount in Ileum II
88	0	Sub dissolved amount in Duodenum bin 0	CYP3A5 amount in Ileum III
89	0	Sub dissolved amount in Jejunum I bin 0	CYP3A5 amount in Ileum IV
90	0	Sub dissolved amount in Jejunum II bin 0	CYP3A5 amount in Colon
91	0	Sub dissolved amount in Ileum I bin 0	Water volume in Stomach
92	0	Sub dissolved amount in Ileum II bin 0	Water volume in Duodenum
93	0	Sub dissolved amount in Ileum III bin 0	Water volume in Jejunum I
94	0	Sub dissolved amount in Ileum IV bin 0	Water volume in Jejunum II
95	0	Sub dissolved amount in Colon bin 0	Water volume in Ileum I
96	0	Sub concentration in enterocytic compartment Duodenum	Water volume in Ileum II
97	0	Sub concentration in enterocytic compartment Jejunum I	Water volume in Ileum III
98	0	Sub concentration in enterocytic compartment Jejunum II	Water volume in Ileum IV
99	0	Sub concentration in enterocytic compartment Ileum I	Water volume in Colon
100	0	Sub concentration in enterocytic compartment Ileum II	Sub solid amount in faeces
101	0	Sub concentration in enterocytic compartment Ileum III	Sub dissolved amount in faeces
102	0	Sub concentration in enterocytic compartment Ileum IV	Sub unreleased amount in faeces
103	0	Sub concentration in enterocytic compartment Colon	Sub solid amount in Stomach bin 0
104	0	Sub metabolite amount in enterocytic compartment Duodenum	Sub solid amount in Duodenum bin 0
105	0	Sub metabolite amount in enterocytic compartment Jejunum I	Sub solid amount in Jejunum I bin 0
106	0	Sub metabolite amount in enterocytic compartment Jejunum II	Sub solid amount in Jejunum II bin 0
107	0	Sub metabolite amount in enterocytic compartment Ileum I	Sub solid amount in Ileum I bin 0
108	0	Sub metabolite amount in enterocytic compartment Ileum II	Sub solid amount in Ileum II bin 0
109	0	Sub metabolite amount in enterocytic compartment Ileum III	Sub solid amount in Ileum III bin 0
110	0	Sub metabolite amount in enterocytic compartment Ileum IV	Sub solid amount in Ileum IV bin 0
111	0	Sub metabolite amount in enterocytic compartment Colon	Sub solid amount in Colon bin 0
112	0	Sub amount absorbed through Duodenum	Sub dissolved amount in Stomach bin 0
113	0	Sub amount absorbed through Jejunum I	Sub dissolved amount in Duodenum bin 0
114	0	Sub amount absorbed through Jejunum II	Sub dissolved amount in Jejunum I bin 0
115	0	Sub amount absorbed through Ileum I	Sub dissolved amount in Jejunum II bin 0
116	0	Sub amount absorbed through Ileum II	Sub dissolved amount in Ileum I bin 0
117	0	Sub amount absorbed through Ileum III	Sub dissolved amount in Ileum II bin 0
118	0	Sub amount absorbed through Ileum IV	Sub dissolved amount in Ileum III bin 0
119	0	Sub amount absorbed through Colon	Sub dissolved amount in Ileum IV bin 0
120	0	Sub cumulative amount through enterocyte Duodenum	Sub dissolved amount in Colon bin 0
121	0	Sub cumulative amount through enterocyte Jejunum I	Sub concentration in enterocytic compartment Duodenum
122	0	Sub cumulative amount through enterocyte Jejunum II	Sub concentration in enterocytic compartment Jejunum I
123	0	Sub cumulative amount through enterocyte Ileum I	Sub concentration in enterocytic compartment Jejunum II
124	0	Sub cumulative amount through enterocyte Ileum II	Sub concentration in enterocytic compartment Ileum I
125	0	Sub cumulative amount through enterocyte Ileum III	Sub concentration in enterocytic compartment Ileum II
126	0	Sub cumulative amount through enterocyte Ileum IV	Sub concentration in enterocytic compartment Ileum III
127	0	Sub cumulative amount through enterocyte Colon	Sub concentration in enterocytic compartment Ileum IV
128	0	Sub total dissolved amount in ADAM compartments	Sub concentration in enterocytic compartment Colon
129	0	Cumulative amount leaving the enterocyte to enter the portal vein	Sub metabolite amount in enterocytic compartment Duodenum
130	0	Inh 1 solid amount in faeces	Sub metabolite amount in enterocytic compartment Jejunum I
131	0	Inh 1 dissolved amount in faeces	Sub metabolite amount in enterocytic compartment Jejunum II
132	0	Inh 1 unreleased amount in faeces	Sub metabolite amount in enterocytic compartment Ileum I
133	0	Inh 1 unreleased amount in Stomach	Sub metabolite amount in enterocytic compartment Ileum II
134	0	Inh 1 unreleased amount in Duodenum	Sub metabolite amount in enterocytic compartment Ileum III
135	0	Inh 1 unreleased amount in Jejunum I	Sub metabolite amount in enterocytic compartment Ileum IV
136	0	Inh 1 unreleased amount in Jejunum II	Sub metabolite amount in enterocytic compartment Colon
137	0	Inh 1 unreleased amount in Ileum I	Sub amount absorbed through Duodenum
138	0	Inh 1 unreleased amount in Ileum II	Sub amount absorbed through Jejunum I
139	0	Inh 1 unreleased amount in Ileum III	Sub amount absorbed through Jejunum II
140	0	Inh 1 unreleased amount in Ileum IV	Sub amount absorbed through Ileum I
141	0	Inh 1 unreleased amount in Colon	Sub amount absorbed through Ileum II
142	0	Inh 1 solid amount in Stomach bin 0	Sub amount absorbed through Ileum III
143	0	Inh 1 solid amount in Duodenum bin 0	Sub amount absorbed through Ileum IV
144	0	Inh 1 solid amount in Jejunum I bin 0	Sub amount absorbed through Colon
145	0	Inh 1 solid amount in Jejunum II bin 0	Sub cumulative amount through enterocyte Duodenum
146	0	Inh 1 solid amount in Ileum I bin 0	Sub cumulative amount through enterocyte Jejunum I
147	0	Inh 1 solid amount in Ileum II bin 0	Sub cumulative amount through enterocyte Jejunum II
148	0	Inh 1 solid amount in Ileum III bin 0	Sub cumulative amount through enterocyte Ileum I
149	0	Inh 1 solid amount in Ileum IV bin 0	Sub cumulative amount through enterocyte Ileum II
150	0	Inh 1 solid amount in Colon bin 0	Sub cumulative amount through enterocyte Ileum III
151	0	Inh 1 dissolved amount in Stomach bin 0	Sub cumulative amount through enterocyte Ileum IV
152	0	Inh 1 dissolved amount in Duodenum bin 0	Sub cumulative amount through enterocyte Colon
153	0	Inh 1 dissolved amount in Jejunum I bin 0	Sub total dissolved amount in ADAM compartments
154	0	Inh 1 dissolved amount in Jejunum II bin 0	Cumulative amount leaving the enterocyte to enter the portal vein
155	0	Inh 1 dissolved amount in Ileum I bin 0	Inh 1 solid amount in faeces
156	0	Inh 1 dissolved amount in Ileum II bin 0	Inh 1 dissolved amount in faeces
157	0	Inh 1 dissolved amount in Ileum III bin 0	Inh 1 unreleased amount in faeces
158	0	Inh 1 dissolved amount in Ileum IV bin 0	Inh 1 unreleased amount in Stomach
159	0	Inh 1 dissolved amount in Colon bin 0	Inh 1 unreleased amount in Duodenum
160	0	Inh 1 concentration in enterocytic compartment Duodenum	Inh 1 unreleased amount in Jejunum I
161	0	Inh 1 concentration in enterocytic compartment Jejunum I	Inh 1 unreleased amount in Jejunum II
162	0	Inh 1 concentration in enterocytic compartment Jejunum II	Inh 1 unreleased amount in Ileum I
163	0	Inh 1 concentration in enterocytic compartment Ileum I	Inh 1 unreleased amount in Ileum II
164	0	Inh 1 concentration in enterocytic compartment Ileum II	Inh 1 unreleased amount in Ileum III
165	0	Inh 1 concentration in enterocytic compartment Ileum III	Inh 1 unreleased amount in Ileum IV
166	0	Inh 1 concentration in enterocytic compartment Ileum IV	Inh 1 unreleased amount in Colon
167	0	Inh 1 concentration in enterocytic compartment Colon	Inh 1 solid amount in Stomach bin 0
168	0	Inh 1 metabolite amount in enterocytic compartment Duodenum	Inh 1 solid amount in Duodenum bin 0
169	0	Inh 1 metabolite amount in enterocytic compartment Jejunum I	Inh 1 solid amount in Jejunum I bin 0
170	0	Inh 1 metabolite amount in enterocytic compartment Jejunum II	Inh 1 solid amount in Jejunum II bin 0
171	0	Inh 1 metabolite amount in enterocytic compartment Ileum I	Inh 1 solid amount in Ileum I bin 0
172	0	Inh 1 metabolite amount in enterocytic compartment Ileum II	Inh 1 solid amount in Ileum II bin 0
173	0	Inh 1 metabolite amount in enterocytic compartment Ileum III	Inh 1 solid amount in Ileum III bin 0
174	0	Inh 1 metabolite amount in enterocytic compartment Ileum IV	Inh 1 solid amount in Ileum IV bin 0
175	0	Inh 1 metabolite amount in enterocytic compartment Colon	Inh 1 solid amount in Colon bin 0
176	0	Inh 1 amount absorbed through Duodenum	Inh 1 dissolved amount in Stomach bin 0
177	0	Inh 1 amount absorbed through Jejunum I	Inh 1 dissolved amount in Duodenum bin 0
178	0	Inh 1 amount absorbed through Jejunum II	Inh 1 dissolved amount in Jejunum I bin 0
179	0	Inh 1 amount absorbed through Ileum I	Inh 1 dissolved amount in Jejunum II bin 0
180	0	Inh 1 amount absorbed through Ileum II	Inh 1 dissolved amount in Ileum I bin 0
181	0	Inh 1 amount absorbed through Ileum III	Inh 1 dissolved amount in Ileum II bin 0
182	0	Inh 1 amount absorbed through Ileum IV	Inh 1 dissolved amount in Ileum III bin 0
183	0	Inh 1 amount absorbed through Colon	Inh 1 dissolved amount in Ileum IV bin 0
184	0	Inh 1 cumulative amount through enterocyte Duodenum	Inh 1 dissolved amount in Colon bin 0
185	0	Inh 1 cumulative amount through enterocyte Jejunum I	Inh 1 concentration in enterocytic compartment Duodenum
186	0	Inh 1 cumulative amount through enterocyte Jejunum II	Inh 1 concentration in enterocytic compartment Jejunum I
187	0	Inh 1 cumulative amount through enterocyte Ileum I	Inh 1 concentration in enterocytic compartment Jejunum II
188	0	Inh 1 cumulative amount through enterocyte Ileum II	Inh 1 concentration in enterocytic compartment Ileum I
189	0	Inh 1 cumulative amount through enterocyte Ileum III	Inh 1 concentration in enterocytic compartment Ileum II
190	0	Inh 1 cumulative amount through enterocyte Ileum IV	Inh 1 concentration in enterocytic compartment Ileum III
191	0	Inh 1 cumulative amount through enterocyte Colon	Inh 1 concentration in enterocytic compartment Ileum IV
192	0	Inh 1 total dissolved amount in ADAM compartments	Inh 1 concentration in enterocytic compartment Colon
193	0	Cumulative amount leaving the enterocyte to enter the portal vein	Inh 1 metabolite amount in enterocytic compartment Duodenum
194	0	Inh 1 Met total dissolved amount in ADAM compartments	Inh 1 metabolite amount in enterocytic compartment Jejunum I
195	0	Cumulative amount leaving the enterocyte to enter the portal vein	Inh 1 metabolite amount in enterocytic compartment Jejunum II
196	0		Inh 1 metabolite amount in enterocytic compartment Ileum I
197	0		Inh 1 metabolite amount in enterocytic compartment Ileum II
198	0		Inh 1 metabolite amount in enterocytic compartment Ileum III
199	0		Inh 1 metabolite amount in enterocytic compartment Ileum IV
200	0		Inh 1 metabolite amount in enterocytic compartment Colon
201	0		Inh 1 amount absorbed through Duodenum
202	0		Inh 1 amount absorbed through Jejunum I
203	0		Inh 1 amount absorbed through Jejunum II
204	0		Inh 1 amount absorbed through Ileum I
205	0		Inh 1 amount absorbed through Ileum II
206	0		Inh 1 amount absorbed through Ileum III
207	0		Inh 1 amount absorbed through Ileum IV
208	0		Inh 1 amount absorbed through Colon
209	0		Inh 1 cumulative amount through enterocyte Duodenum
210	0		Inh 1 cumulative amount through enterocyte Jejunum I
211	0		Inh 1 cumulative amount through enterocyte Jejunum II
212	0		Inh 1 cumulative amount through enterocyte Ileum I
213	0		Inh 1 cumulative amount through enterocyte Ileum II
214	0		Inh 1 cumulative amount through enterocyte Ileum III
215	0		Inh 1 cumulative amount through enterocyte Ileum IV
216	0		Inh 1 cumulative amount through enterocyte Colon
217	0		Inh 1 total dissolved amount in ADAM compartments
218	0		Cumulative amount leaving the enterocyte to enter the portal vein
219	0		Inh 1 Met total dissolved amount in ADAM compartments
220	0		Cumulative amount leaving the enterocyte to enter the portal vein

## Sheet: Sim-NEurCaucasian
	Population		Population : Liver		Population : Kidney		Population : Skin		Population : GI Tract		Population : Lung		Population : Tissue Composition		Population : Blood		Population : Tissue Blood Flow Rates		Population : Brain		Population : Additional Organ		Population : FcRn IgG		Population : Lymph		Population : Target
	Ref Bodyweight (kg)	80.7056	Liver model	Well Stirred	Male Baseline 1	76.5	MechDermA - Forearm		Dep of Duod. on BSA:C1 Len	0.205	Ventillation-perfusion ratio: Mean	1	Adipose : EW (%)	14.1	Haematocrit Mean : Male	43	Adipose : Male (% of Qc)	5	CSF Flow		Additional Organ : EW (%)	14.1	IgG Concentration (µM)	80.7	% of total lymph flow (Adipose)	12.8	Target1 Name	TNF-alpha
	Maximum Age (years)	95	Liver weight : Slope vs BSA	0.722	Male Baseline 1 CV (%)	16.1	SCorneum Thickness (µm) : Male	15.7	Dep of Duod. on BSA:Exp Len	0.55	Ventillation-perfusion ratio: CV (%)	35	Adipose : NL (%)	79	Haematocrit CV (%) : Male	6.5	Adipose : Female (% of Qc)	8.5	CSF production rate (L/h)	0.021	Additional Organ : IW (%)	3.9	IgG Concentration CV (%)	12.6	% of total lymph flow (Bone)	0	Target1 Rmax (µM)	0
	Minimum Age (years)	18	Operational Concentrations	Liver Compartment (Outlet)	Male Age Cut-Off	61	SCorneum Thickness CV (%) : Male	33	Dep of Duod. on BSA:C1 Dia	0.033	Volume Airway (L): Mean	0.1	Adipose : NP (%)	0.2	Haematocrit Mean : Female	38	Bone : Male (% of Qc)	5	CSF production rate CV (%)	10	Additional Organ : NL (%)	79	IgG KD (µM)	0.728	% of total lymph flow (Brain)	1.05	Target1 Rmax CV (%)	30
	Propn of Females	0.5	Liver weight : Intcpt vs BSA	1.176	Male Age Cut-off Baseline	81.2	SCorneum Thickness (µm) : Female	15.7	Dep of Duod. on BSA:Exp Dia	0.383	Volume Airway (L): CV (%)	30	Bone : EW (%)	9.8	Haematocrit CV (%) : Female	7.1	Bone : Female (% of Qc)	5	Bulk flow from brain to CSF (% CSF production)	25	Additional Organ : NP (%)	0.2	IgG KD CV (%)	10	% of total lymph flow (Stomach and Oesophagus)	12	Target1 Kdeg (1/h)	0
	BSA C1 Param	0.007184	Liver Volume CV (%)	12	Male Age Cut-Off CV1 (%)	27.4	SCorneum Thickness CV (%) : Female	34	Jej-Ileum Ratio:Jej Len	0.4	Volume Alveoli (L): Mean	5.6	Bone : NL (%)	7.4	AGP Mean : Male	0.811	Brain : Male (% of Qc)	12	Bulk flow from brain to CSF (% CSF production) CV (%)	8	Additional Organ : AP (mg/g)	0.4	IgG KDcomplex (µM)	2.912	% of total lymph flow (Heart)	1	Target1 Kdeg CV (%)	30
	BSA Wt Exp	0.425	Liver Density	1080	Male Age Cut-Off CV2 (%)	21.2	SCorneum Fat (%) : Male	12.9	Enterocyte Volume (L)	0.517	Volume Alveoli (L): CV (%)	10	Bone : NP (%)	0.11	AGP CV (%) : Male	15	Brain : Female (% of Qc)	12	CSF spinal absorption rate (%)	38	Additional Organ : KpALB	0.037	IgG KDcomplex CV (%)	30	% of total lymph flow (Kidney)	8.5	Target1 Kshed (1/hr)	0
	BSA Ht Exp	0.725	MPPGL : Baseline	1.407	Female Baseline 1	57	SCorneum Fat CV (%) : Male	30	Jej-Ileum Ratio:Jej/Duo Dia C1	0.8125	Volume Pulmonary Capilliary Blood (L): Mean	0.089	Brain : EW (%)	9.2	AGP Mean : Female	0.791	Pancreas : Male (% of Qc)	1	CSF spinal absorption rate CV (%)	30	Additional Organ : KpLPP	0.068	IgG CLcat,free (L/h)	0.0175	% of total lymph flow (Liver)	33	Target1 Kshed CV (%)	30
	HT & WT option	Values	MPPGL : C1	0.01579	Female Baseline CV (%)	20.4	SCorneum Fat (%) : Female	12.9	Jej-Ileum Ratio:Il/Duo Dia C1	0.725	Volume Pulmonary Capilliary Blood (L): CV (%)	20	Brain : NL (%)	5.1	AGP CV (%) : Female	13	Pancreas : Female (% of Qc)	1	Bulk flow from spinal CSF to cranial CSF (% CSF spinal absorption rate)	90	Additional Organ : membrane potential : (mV)	-41	IgG CLcat,free CV (%)	10	% of total lymph flow (Lung)	3	Target1 Lambda (1/h)	0
	Male Body Weight C0	2.7208	MPPGL : C2	-0.0003824	Female Age Cut-Off 1	48	SCorneum Fat CV (%) : Female	30	Dep of LG on BSA :C1	5.231	Volume Epithelial Lining Fluid (L): Mean	0.025	Brain : NP (%)	5.65	HSA C0 : Male	50.34	Stomach : Male (% of Qc)	1	Bulk flow from spinal CSF to cranial CSF (% CSF spinal absorption rate) CV (%)	100	Additional Organ : subcell membrane potential (mV)	10	Ontogeny Profile	No Profile Used	% of total lymph flow (Muscle)	16	Target2 Name	IgE
	Male Body Weight C1	0.0097	MPPGL : C3	2.37e-06	Female Age Cut-Off Baseline 2	66.2	VEpidermis Thickness (µm) : Male	50.7	Dep of LG on BSA :Exp	0.414	Volume Epithelial Lining Fluid(L): CV (%)	20	Gut : EW (%)	26.7	HSA C1 : Male	-0.0575	Stomach : Female (% of Qc)	1	CSF Volume		Additional Organ : subcell pH	5	FcRn Concentration (µM)	40	% of total lymph flow (Pancreas)	0.3	Target2 Rmax (µM)	0
	Male Body Weight CV (%)	16.7	MPPGL : CV (%)	26.9	Female Age Cut-off 1 CV 1 (%)	26.5	VEpidermis Thickness CV (%) : Male	24	Dep of LG on BSA :CV LG Len	20	Surface Area Airway (m2): Mean	1.5	Gut : NL (%)	4.87	HSA C2 : Male	-0.0738	SI : Male (% of Qc)	10	CSF (% Brain volume) : Male	10.5	Additional Organ : IW pH	7	FcRn Coefficient	0.95	% of total lymph flow (Skin)	7.3	Target2 Rmax CV (%)	30
	Male Height C0	176.87	CPPGL : Baseline	28.8945	Female Age Cut-off 1 CV 2 (%)	22.8	VEpidermis Thickness (µm) : Female	53.8	S9PPI : input type	Predicted	Surface Area Airway (m2): CV (%)	50	Gut : NP (%)	1.63	HSA CV (%) : Male	10	SI : Female (% of Qc)	11	CSF (% Brain volume) : Female	9.2	Additional Organ Local pH : EW	7.4	Additional Clearance (L/h)	0.0017	% of total lymph flow (Spleen)	1	Target2 Kdeg (1/h)	0
	Male Height C1	0.0743	CPPGL : Correlation Coefficient	1.31032	Female Age Cut-Off 2	78	VEpidermis Thickness CV (%) : Female	19	S9PPI : Mean	5320	Surface Area Alveoli (m2): Mean	140	Heart : EW (%)	31.3	HSA C0 : Female	49.38	Villi : Male (% of Qc)	6	Spinal (% CSF) : Male	20	Additional Organ Local pH : IW	7	Additional Clearance CV (%)	10	% of total lymph flow (Additional Organ)	0	Target2 Kdeg CV (%)	30
	Male Height C2	-0.0021	CPPGL : CV (%)	21.467	Female Age Cut-Off Baseline 3	79.5	VEpidermis Fat (%) : Male	3	MPPI : Mean	2978	Surface Area Alveoli (m2): CV (%)	30	Heart : NL (%)	1.15	HSA C1 : Female	-0.037	Villi : Female (% of Qc)	6	Spinal (% CSF) : Female	20	Additional Organ : subcell fraction (%)	0	Lymphatic Clearance (L/h)	0	Lymph flow rate (L/h/kg)	0.00385518	Target2 Kshed (1/hr)	0
	Male Height CV (%)	3.95	HPGL : Baseline	3.103	Female Age Cut-Off 2 CV 1 (%)	38.3	VEpidermis Fat CV (%) : Male	30	MPPI : CV (%)	30	Lobe Distribution Percentage (%) Ventillation Rate RL	25.9	Heart : NP (%)	1.66	HSA C2 : Female	-0.1286	LI : Male (% of Qc)	4	Intracranial blood volume (% Brain Volume) : Male	5	Additional Organ : Male (% of Qc)	0.65	Lymphatic Clearance CV (%)	10	Lymph volume (L/kg)	0.00386	Target2 Kshed CV (%)	30
	Female Body Weight C0	2.936	HPGL : Age Coefficient	-0.655	Female Age Cut-Off 2 CV 2 (%)	31.6	VEpidermis Fat (%) : Female	3	CPPI : Mean	2342	Lobe Distribution Percentage (%) Ventillation Rate RL	12.4	Kidney : EW (%)	28.3	HSA CV (%) : Female	10	LI : Female (% of Qc)	5	Intracranial blood volume (% Brain Volume) : Female	5	Additional Organ : Female (% of Qc)	0.65	Vendothelial (fraction of tissuevolume)	0.005	Lymph volume CV (%)	30	Target2 Lambda (1/h)	0
	Female Body Weight C1	0.008	HPGL : CV (%)	41.9	Prediction Method	Method 1	VEpidermis Fat CV (%) : Female	30	CPPI : CV (%)	31	Lobe Distribution Percentage (%) Ventillation Rate RL	14.8	Kidney : NL (%)	2.07	Other Mean : Male	0	Heart : Male (% of Qc)	4	Abundance : ABCB1 (P-gp/MDR1) Mean	1	Additional Organ % of Body Weight	1	σv (Sigmav)	0.76	Total Plasma Protein (g/100ml)	6.85	Target3 Name	CD11a
	Female Body Weight CV (%)	19.9	P450/10e6 Cells : Baseline	3.034	GFR Cap Minimum Defined Population Limit (ml/min/1.73m^2)	15			MPPC : Mean	622	Lobe Distribution Percentage (%) Ventillation Rate RL	32.1	Kidney : NP (%)	1.62	Other CV (%)(%) : Male	0	Heart : Female (% of Qc)	5	Abundance : ABCB1 (P-gp/MDR1) CV (%)	0	Additional Organ % of Body Weight CV (%)	30	σl (Sigmal)	0.2	Total Plasma Protein CV (%)	1.5	Target3 Rmax (µM)	0
	Female Height C0	161.39	P450/10e6 Cells : HPGL Coefficient	-0.506	GFR Cap Maximum Defined Population Limit (ml/min/1.73m^2)	400	MechDermA - Upper Arm		MPPC : CV (%)	30	Lobe Distribution Percentage (%) Ventillation Rate RL	14.8	Liver : EW (%)	16.5	Other Mean : Female	0	Kidney : Male (% of Qc)	19	Abundance : ABCC4 (MRP4) Mean	1	Additional Organ Density (g/L)	923	Kup (1/h)	0.0298			Target3 Rmax CV (%)	30
	Female Height C1	0.1498	% Hepatic Bile Entering Gallbladder Mean	70.3	Ref Value for Males 20~30	130	SCorneum Thickness (µm) : Male	11.9	TMePPI : Mean	2737	Lobe Distribution Percentage (%) Ventillation Rate RL	100	Liver : NL (%)	3.48	Other CV (%)(%) : Female	0	Kidney : Female (% of Qc)	17	Abundance : ABCC4 (MRP4) CV (%)	0	Additional Organ Capillary Bed (%)	5	Krc (1/h)	0.548			Target3 Kdeg (1/h)	0
	Female Height C2	-0.0027	% Hepatic Bile Entering Gallbladder CV (%)	32.1	Ref Value for Females 20~30	120	SCorneum Thickness CV (%) : Male	29	TMePPI : CV (%)	66	Lobe Distribution Percentage (%) Ventillation Rate RL	100	Liver : NP (%)	2.52	User-defined Binding Type	User-defined	Liver (Art) : Male (% of Qc)	6.5	Abundance : ABCG2 (BCRP) Mean	1	For neutral (phospho)lipid Partitioning	Using Olive oil-water Partitioning	Krc,complex (1/h)	1.125			Target3 Kdeg CV (%)	30
	Female Height CV (%)	4.09	IMMC Cycle Time Mean (h)	1.55	Age Limit	140	SCorneum Thickness (µm) : Female	13.9	TMePPC : Mean	112	Lobe Distribution Percentage (%) Blood Flow Rate RL	2.5	Lung : EW (%)	34.8	Ontogeny Profile	No Profile Used	Liver (Art) : Female (% of Qc)	6.5	Abundance : ABCG2 (BCRP) CV (%)	0	Additional Organ : Endothelial Volume (%)	0.35625	FR	0.715			Target3 Kshed (1/hr)	0
	Abundance : CYP1A2 PM Freq	0	IMMC Cycle Time CV (%)	55	Kidney Size Baseline	15.4	SCorneum Thickness CV (%) : Female	28	TMePPC : CV (%)	33	Lobe Distribution Percentage (%) Blood Flow Rate RL	11.8	Lung : NL (%)	0.3	Use Plasma ES Option	Yes	Liver (Port) : Male (% of Qc)	19	Abundance : Apical Influx (BBB) Mean	1	Additional Organ : FcRn Concentration (μM)	40	Adipose σv	0.815			Target3 Kshed CV (%)	30
	Abundance : CYP1A2 UM Freq	0	Fasted Gallbladder Release Constant Mean (1/h)	0.18	Kidney Size BW Coeff	2.04	SCorneum Fat (%) : Male	12.9	Use NEWE model for MBI and/or induction of gut CYPs	No	Lobe Distribution Percentage (%) Blood Flow Rate RL	8.6	Lung : NP (%)	0.9	Abundance : Plasma ES EM Mean	1	Liver (Port) : Female (% of Qc)	21.5	Abundance : Apical Influx (BBB) CV (%)	0	Additional Organ : FcRn Concentration CV (%)	30	Bone σv	1			Target3 Lambda (1/h)	0
	Abundance : CYP1A2 IM Freq	0	Fasted Gallbladder Release Constant CV (%)	30	Kidney Size BH Coeff	51.8	SCorneum Fat CV (%) : Male	47	CYP2C9 EM Mean	12.9	Lobe Distribution Percentage (%) Blood Flow Rate RL	34.9	Muscle : EW (%)	9.1	Abundance : Plasma ES EM CV (%)	30	Lung : Male (% of Qc)	100	Abundance : Apical Influx (BCSFB) Mean	1	Additional Organ : IgG CLcat (L/h)	0.0175	Brain σv	0.998			Target4 Name	Target 4
	Abundance : CYP2A6 PM Freq	0	Fed Gallbladder Release Constant Mean (1/h)	0.48	Kidney Weight CV (%)	23.4	SCorneum Fat (%) : Female	12.9	CYP2C9 EM CV (%)	60	Lobe Distribution Percentage (%) Blood Flow Rate RL	8.6	Muscle : NL (%)	2.38	Abundance : Plasma ES PM Mean	0	Lung : Female (% of Qc)	100	Abundance : Apical Influx (BCSFB) CV (%)	0	Additional Organ : IgG CLcat CV (%)	30	Gut σv	0.8			Target4 Rmax (µM)	0
	Abundance : CYP2A6 UM Freq	0	Fed Gallbladder Release Constant CV (%)	19	Kidney Density	1050	SCorneum Fat CV (%) : Female	47	CYP2C9 PM Mean	3.8	Lobe Distribution Percentage (%) Blood Flow Rate RL	5	Muscle : NP (%)	0.72	Abundance : Plasma ES PM CV (%)	0	Muscle : Male (% of Qc)	17	Abundance : Apical Efflux (BCSFB) Mean	1	Additional Organ : Kup (1/h)	0.02979	Heart σv	0.489			Target4 Rmax CV (%)	30
	Abundance : CYP2A6 IM Freq	0	Fasted Gallbladder Residual Volume Mean (%)	79.4	PTCPGK Mean	60	VEpidermis Thickness (µm) : Male	37.1	CYP2C9 PM Mean CV (%)	60	Lobe Distribution Percentage (%) Blood Flow Rate RL	2.5	Pancreas : EW (%)	12	Abundance : Plasma ES UM Mean	0	Muscle : Female (% of Qc)	12	Abundance : Apical Efflux (BCSFB) CV (%)	0	Additional Organ : Krc1 (1/h)	3.605	Kidney σv	0.726			Target4 Kdeg (1/h)	0
	Abundance : CYP2B6 PM Freq	0.11	Fasted Gallbladder Residual Volume CV (%)	13.1	PTCPGK CV (%)	30	VEpidermis Thickness CV (%) : Male	51	CYP2C9 UM Mean	0	Lobe Distribution Percentage (%) Alveoli Volume RL	26.3	Pancreas : NL (%)	4.1	Abundance : Plasma ES UM CV (%)	0	Skin : Male (% of Qc)	5			Additional Organ : Krc2 (1/h)	7.21	Liver σv	0.22			Target4 Kdeg CV (%)	30
	Abundance : CYP2B6 UM Freq	0	Fed Gallbladder Residual Volume Mean (%)	59.9	MPPGK Mean	12.8	VEpidermis Thickness (µm) : Female	45.7	CYP2C9 UM Mean CV (%)	0	Lobe Distribution Percentage (%) Alveoli Volume RL	10.5	Pancreas : NP (%)	0.93	Abundance : Plasma ES IM Mean	0	Skin : Female (% of Qc)	5			Additional Organ : FR	0.715	Lung σv	0.397			Target4 Kshed (1/hr)	0
	Abundance : CYP2B6 IM Freq	0	Fed Gallbladder Residual Volume CV (%)	39.6	MPPGK CV (%)	55	VEpidermis Thickness CV (%) : Female	62	CYP2C9 IM Mean	0	Lobe Distribution Percentage (%) Alveoli Volume RL	15.8	Skin : EW (%)	62.3	Abundance : Plasma ES IM CV (%)	0	Spleen : Male (% of Qc)	2			Additional Organ : σv (Sigmav)	0	Muscle σv	0.875			Target4 Kshed CV (%)	30
	Abundance : CYP2C8 PM Freq	0	Enzyme interCorr Switch	Off	CPPGK Mean	0	VEpidermis Fat (%) : Male	3	CYP2C9 IM Mean CV (%)	0	Lobe Distribution Percentage (%) Alveoli Volume RL	26.3	Skin : NL (%)	2.84			Spleen : Female (% of Qc)	3			Additional Organ : σl (Sigmal)	0	Skin σv	0.822			Target4 Lambda (1/h)	0
	Abundance : CYP2C8 UM Freq	0	Enzyme Corr Switch	On	CPPGK CV (%)	30	VEpidermis Fat CV (%) : Male	30	CYP2C9 Mean Turnover Rate	0.03	Lobe Distribution Percentage (%) Alveoli Volume RL	21	Skin : NP (%)	1.11			Qmax	4			Additional Organ : ε (L/h)	0.24	Spleen σv	0.2			Target5 Name	Target 5
	Abundance : CYP2C8 IM Freq	0	Enz Corr C0	62.775	S9 Method	Predicted	VEpidermis Fat (%) : Female	3	CYP2C9 Mean Turnover Rate CV (%)	20	Lobe Distribution Percentage (%) Alveoli Volume RL	50	Spleen : EW (%)	20.8			Qmax CV (%)	20			Additional Organ : ε CV	30	Additional Organ σv	0			Target5 Rmax (µM)	0
	Abundance : CYP2C9 PM Freq	0.06	Enz Corr C1	0.3934	S9PPGK Mean	12.8	VEpidermis Fat CV (%) : Female	30	Colon CYP2C9 EM Mean	0	Lobe Distribution Percentage (%) Alveoli Volume RL	50	Spleen : NL (%)	2.01			Cap on PV Blood Flow Fed/Fasted ratio	10			Additional Organ : PS Lock	Locked	Pancreas σv	0.5			Target5 Rmax CV (%)	30
	Abundance : CYP2C9 UM Freq	0	Enz 2 Corr CV	24	UGT1A1 EM Mean	1			Colon CYP2C9 EM CV (%)	0	Lobe Distribution Percentage (%) Absorption Area RL	26.3	Spleen : NP (%)	1.98							Additional Organ : PS (L/h)	0.01	Adipose σl	0.2			Target5 Kdeg (1/h)	0
	Abundance : CYP2C9 IM Freq	0	Abundance : CYP1A2 EM Mean	52	UGT1A1 EM Mean CV (%)	50	MechDermA - Lower Leg		Colon CYP2C9 PM Mean	N/A	Lobe Distribution Percentage (%) Absorption Area RL	10.5	Plasma : EW (%)	94.5							Additional Organ : PS CV (%)	30	Bone σl	0.2			Target5 Kdeg CV (%)	30
	Abundance : CYP2C18 PM Freq	0	Abundance : CYP1A2 EM CV (%)	67	UGT1A1 PM Mean	0.42	SCorneum Thickness (µm) : Male	16.8	Colon CYP2C9 PM Mean CV (%)	N/A	Lobe Distribution Percentage (%) Absorption Area RL	15.8	Plasma : NL (%)	0.35							Additional Organ : R,krough (μm)	75	Brain σl	0.2			Target5 Kshed (1/hr)	0
	Abundance : CYP2C18 UM Freq	0	Abundance : CYP1A2 PM Mean	0	UGT1A1 PM Mean CV (%)	50	SCorneum Thickness CV (%) : Male	52	Colon CYP2C9 UM Mean	N/A	Lobe Distribution Percentage (%) Absorption Area RL	26.3	Plasma : NP (%)	0.22							Additional Organ : R,krough CV	0	Gut σl	0.2			Target5 Kshed CV (%)	30
	Abundance : CYP2C18 IM Freq	0	Abundance : CYP1A2 PM CV (%)	0	UGT1A1 UM Mean	1.46	SCorneum Thickness (µm) : Female	13.9	Colon CYP2C9 UM Mean CV (%)	N/A	Lobe Distribution Percentage (%) Absorption Area RL	21	RBC : EW (%)	0							Additional Organ : r	0	Heart σl	0.2			Target5 Lambda (1/h)	0
	Abundance : CYP2C19 PM Freq	0.024	Abundance : CYP1A2 UM Mean	0	UGT1A1 UM Mean CV (%)	50	SCorneum Thickness CV (%) : Female	43	Colon CYP2C9 IM Mean	N/A	Lobe Distribution Percentage (%) Absorption Area RL	50	RBC : NL (%)	0.17							Additional Organ : r CV	0	Kidney σl	0.2			Target6 Name	Target 6
	Abundance : CYP2C19 UM Freq	0	Abundance : CYP1A2 UM CV (%)	0	UGT1A1 IM Mean	0.72	SCorneum Fat (%) : Male	4.7	Colon CYP2C9 IM Mean CV (%)	N/A	Lobe Distribution Percentage (%) Absorption Area RL	50	RBC : NP (%)	0.29							Additional Organ : Rcap (μm)	0	Liver σl	0.2			Target6 Rmax (µM)	0
	Abundance : CYP2C19 IM Freq	0	Abundance : CYP1A2 IM Mean	0	UGT1A1 IM Mean CV (%)	50	SCorneum Fat CV (%) : Male	62	Colon CYP2C9 Mean Turnover Rate	N/A	Lobe Distribution Percentage (%) Pulmonary Capilliary Blood Volume RL	16.66	Adipose : IW (%)	3.9							Additional Organ : Rcap CV	0	Lung σl	0.2			Target6 Rmax CV (%)	30
	Abundance : CYP2D6 PM Freq	0.082	Abundance : CYP1A2 IM CV (%)	0	UGT1A1 Absolute Abundance	6.1	SCorneum Fat (%) : Female	4.7	Colon CYP2C9 Mean Turnover Rate CV (%)	N/A	Lobe Distribution Percentage (%) Pulmonary Capilliary Blood Volume RL	16.67	Adipose : AP (mg/g)	0.4									Muscle σl	0.2			Target6 Kdeg (1/h)	0
	Abundance : CYP2D6 UM Freq	0.053	Turnover rate : CYP1A2 Mean	0.0183	UGT1A1 Mean Turnover Rate	0.0578	SCorneum Fat CV (%) : Female	62	CYP2C19 EM Mean	1.5	Lobe Distribution Percentage (%) Pulmonary Capilliary Blood Volume RL	16.67	Adipose : KpALB	0.037									Skin σl	0.2			Target6 Kdeg CV (%)	30
	Abundance : CYP2D6 IM Freq	0	Turnover rate : CYP1A2 CV (%)	56	UGT1A1 Mean Turnover Rate CV (%)	30	VEpidermis Thickness (µm) : Male	63.4	CYP2C19 EM CV (%)	60	Lobe Distribution Percentage (%) Pulmonary Capilliary Blood Volume RL	16.67	Adipose : KpLPP	0.068									Spleen σl	0.2			Target6 Kshed (1/hr)	0
	Abundance : CYP2E1 PM Freq	0	Abundance : CYP2A6 EM Mean	20	UGT1A3 EM Mean	1	VEpidermis Thickness CV (%) : Male	32	CYP2C19 PM Mean	0	Lobe Distribution Percentage (%) Pulmonary Capilliary Blood Volume RL	16.67	Bone : IW (%)	34.1									Additional Organ σl	0			Target6 Kshed CV (%)	30
	Abundance : CYP2E1 UM Freq	0	Abundance : CYP2A6 EM CV (%)	173	UGT1A3 EM Mean CV (%)	50	VEpidermis Thickness (µm) : Female	74.9	CYP2C19 PM Mean CV (%)	0	Lobe Distribution Percentage (%) Pulmonary Capilliary Blood Volume RL	8.33	Bone : AP (mg/g)	0.67									Pancreas σl	0.2			Target6 Lambda (1/h)	0
	Abundance : CYP2E1 IM Freq	0	Abundance : CYP2A6 PM Mean	0	UGT1A3 PM Mean	0	VEpidermis Thickness CV (%) : Female	19	CYP2C19 UM Mean	0	Lobe Distribution Percentage (%) Pulmonary Capilliary Blood Volume RL	8.33	Bone : KpALB	0.1									Adipose FR	0			Target7 Name	Target 7
	Abundance : CYP2J2 PM Freq	0	Abundance : CYP2A6 PM CV (%)	0	UGT1A3 PM Mean CV (%)	0	VEpidermis Fat (%) : Male	3	CYP2C19 UM Mean CV (%)	0	Lobe Distribution Percentage (%) Pulmonary Mass Volume RL	16.66	Bone : KpLPP	0.05									Bone FR	1			Target7 Rmax (µM)	0
	Abundance : CYP2J2 UM Freq	0	Abundance : CYP2A6 UM Mean	0	UGT1A3 UM Mean	0	VEpidermis Fat CV (%) : Male	30	CYP2C19 IM Mean	0	Lobe Distribution Percentage (%) Pulmonary Mass Volume RL	16.67	Brain : IW (%)	67.8									Brain FR	1			Target7 Rmax CV (%)	30
	Abundance : CYP2J2 IM Freq	0	Abundance : CYP2A6 UM CV (%)	0	UGT1A3 UM Mean CV (%)	0	VEpidermis Fat (%) : Female	3	CYP2C19 IM Mean CV (%)	0	Lobe Distribution Percentage (%) Pulmonary Mass Volume RL	16.67	Brain : AP (mg/g)	0.4									Gut FR	1			Target7 Kdeg (1/h)	0
	Abundance : CYP3A4 PM Freq	0	Abundance : CYP2A6 IM Mean	0	UGT1A3 IM Mean	0	VEpidermis Fat CV (%) : Female	30	CYP2C19 Mean Turnover Rate	0.03	Lobe Distribution Percentage (%) Pulmonary Mass Volume RL	16.67	Brain : KpALB	0.048									Heart FR	1			Target7 Kdeg CV (%)	30
	Abundance : CYP3A4 UM Freq	0	Abundance : CYP2A6 IM CV (%)	0	UGT1A3 IM Mean CV (%)	0			CYP2C19 Mean Turnover Rate CV (%)	20	Lobe Distribution Percentage (%) Pulmonary Mass Volume RL	16.67	Brain : KpLPP	0.041									Kidney FR	1			Target7 Kshed (1/hr)	0
	Abundance : CYP3A4 IM Freq	0	Turnover rate : CYP2A6 Mean	0.0267	UGT1A3 Absolute Abundance	0	MechDermA - Thigh		Colon CYP2C19 EM Mean	0	Lobe Distribution Percentage (%) Pulmonary Mass Volume RL	8.33	Gut : IW (%)	45.1									Liver FR	1			Target7 Kshed CV (%)	30
	Abundance : CYP3A5 PM Freq	0.83	Turnover rate : CYP2A6 CV (%)	56	UGT1A3 Mean Turnover Rate	1e-06	SCorneum Thickness (µm) : Male	11	Colon CYP2C19 EM CV (%)	0	Lobe Distribution Percentage (%) Pulmonary Mass Volume RL	8.33	Gut : AP (mg/g)	2.84									Lung FR	1			Target7 Lambda (1/h)	0
	Abundance : CYP3A5 UM Freq	0	Abundance : CYP2B6 EM Mean	17	UGT1A3 Mean Turnover Rate CV (%)	30	SCorneum Thickness CV (%) : Male	32	Colon CYP2C19 PM Mean	N/A	Lobe Distribution Percentage (%) Epithelial Lining Fluid Volume RL	16.66	Gut : KpALB	0.158									Muscle FR	0			Target8 Name	Target 8
	Abundance : CYP3A5 IM Freq	0	Abundance : CYP2B6 EM CV (%)	122	UGT1A4 EM Mean	1	SCorneum Thickness (µm) : Female	11	Colon CYP2C19 PM Mean CV (%)	N/A	Lobe Distribution Percentage (%) Epithelial Lining Fluid Volume RL	16.67	Gut : KpLPP	0.141									Skin FR	0			Target8 Rmax (µM)	0
	Abundance : CYP3A7 PM Freq	0.88	Abundance : CYP2B6 PM Mean	6	UGT1A4 EM Mean CV (%)	50	SCorneum Thickness CV (%) : Female	20	Colon CYP2C19 UM Mean	N/A	Lobe Distribution Percentage (%) Epithelial Lining Fluid Volume RL	16.67	Heart : IW (%)	44.5									Spleen FR	1			Target8 Rmax CV (%)	30
	Abundance : CYP3A7 UM Freq	0	Abundance : CYP2B6 PM CV (%)	200	UGT1A4 PM Mean	0	SCorneum Fat (%) : Male	23.7	Colon CYP2C19 UM Mean CV (%)	N/A	Lobe Distribution Percentage (%) Epithelial Lining Fluid Volume RL	16.67	Heart : AP (mg/g)	3.07									Additional Organ FR	1			Target8 Kdeg (1/h)	0
	Abundance : CYP3A7 IM Freq	0	Abundance : CYP2B6 UM Mean	0	UGT1A4 PM Mean CV (%)	0	SCorneum Fat CV (%) : Male	24	Colon CYP2C19 IM Mean	N/A	Lobe Distribution Percentage (%) Epithelial Lining Fluid Volume RL	16.67	Heart : KpALB	0.157									Pancreas FR	1			Target8 Kdeg CV (%)	30
	Abundance : CYP2C9 Allelele 1 Genotype 1 Freq	0.672	Abundance : CYP2B6 UM CV (%)	0	UGT1A4 UM Mean	0	SCorneum Fat (%) : Female	23.7	Colon CYP2C19 IM Mean CV (%)	N/A	Lobe Distribution Percentage (%) Epithelial Lining Fluid Volume RL	8.33	Heart : KpLPP	0.16									Adipose FcRn	0.93069			Target8 Kshed (1/hr)	0
	Abundance : CYP2C9 Allelele 1 Genotype 2 Freq	0.186	Abundance : CYP2B6 IM Mean	0	UGT1A4 UM Mean CV (%)	0	SCorneum Fat CV (%) : Female	24	Colon CYP2C19 Mean Turnover Rate	N/A	Lobe Distribution Percentage (%) Epithelial Lining Fluid Volume RL	8.33	Kidney : IW (%)	50									Bone FcRn	2.24581			Target8 Kshed CV (%)	30
	Abundance : CYP2C9 Allelele 1 Genotype 3 Freq	0.111	Abundance : CYP2B6 IM CV (%)	0	UGT1A4 IM Mean	0	VEpidermis Thickness (µm) : Male	53.3	Colon CYP2C19 Mean Turnover Rate CV (%)	N/A	Lobe Distribution Percentage (%) Ventillation Rate RM	25.9	Kidney : AP (mg/g)	2.48									Brain FcRn	0.246748			Target8 Lambda (1/h)	0
	Abundance : CYP2C9 Allelele 1 Genotype 4 Freq	0.011	Turnover rate : CYP2B6 Mean	0.0217	UGT1A4 IM Mean CV (%)	0	VEpidermis Thickness CV (%) : Male	40	CYP2D6 EM Mean	0.8	Lobe Distribution Percentage (%) Ventillation Rate RM	12.4	Kidney : KpALB	0.13									Gut FcRn	1.69464			Target9 Name	Target 9
	Abundance : CYP2C9 Allelele 1 Genotype 5 Freq	0.017	Turnover rate : CYP2B6 CV (%)	56	UGT1A4 Absolute Abundance	8.7	VEpidermis Thickness (µm) : Female	43.3	CYP2D6 EM CV (%)	60	Lobe Distribution Percentage (%) Ventillation Rate RM	14.8	Kidney : KpLPP	0.137									Heart FcRn	0.864965			Target9 Rmax (µM)	0
	Abundance : CYP2C9 Allelele 1 Genotype 6 Freq	0.003	Abundance : CYP2C8 EM Mean	24	UGT1A4 Mean Turnover Rate	1e-06	VEpidermis Thickness CV (%) : Female	40	CYP2D6 PM Mean	0	Lobe Distribution Percentage (%) Ventillation Rate RM	32.1	Liver : IW (%)	58.6									Kidney FcRn	0.766998			Target9 Rmax CV (%)	30
	Abundance : UGT1A1 PM Freq	0.11	Abundance : CYP2C8 EM CV (%)	81	UGT1A4 Mean Turnover Rate CV (%)	30	VEpidermis Fat (%) : Male	3	CYP2D6 PM Mean CV (%)	0	Lobe Distribution Percentage (%) Ventillation Rate RM	14.8	Liver : AP (mg/g)	5.09									Liver FcRn	2.40702			Target9 Kdeg (1/h)	0
	Abundance : UGT1A1 UM Freq	0.01	Abundance : CYP2C8 PM Mean	0	UGT1A5 EM Mean	1	VEpidermis Fat CV (%) : Male	30	CYP2D6 UM Mean	1.6	Lobe Distribution Percentage (%) Ventillation Rate RM	100	Liver : KpALB	0.086									Lung FcRn	3.04753			Target9 Kdeg CV (%)	30
	Abundance : UGT1A1 IM Freq	0.44	Abundance : CYP2C8 PM CV (%)	0	UGT1A5 EM Mean CV (%)	50	VEpidermis Fat (%) : Female	3	CYP2D6 UM Mean CV (%)	60	Lobe Distribution Percentage (%) Ventillation Rate RM	100	Liver : KpLPP	0.161									Muscle FcRn	0.485806			Target9 Kshed (1/hr)	0
	Abundance : UGT1A3 PM Freq	0	Abundance : CYP2C8 UM Mean	0	UGT1A5 PM Mean	0	VEpidermis Fat CV (%) : Female	30	CYP2D6 IM Mean	0	Lobe Distribution Percentage (%) Blood Flow Rate RM	2.5	Lung : IW (%)	46.3									Skin FcRn	2.96258			Target9 Kshed CV (%)	30
	Abundance : UGT1A3 UM Freq	0	Abundance : CYP2C8 UM CV (%)	0	UGT1A5 PM Mean CV (%)	0			CYP2D6 IM Mean CV (%)	0	Lobe Distribution Percentage (%) Blood Flow Rate RM	11.8	Lung : AP (mg/g)	0.5									Spleen FcRn	2.24581			Target9 Lambda (1/h)	0
	Abundance : UGT1A3 IM Freq	0	Abundance : CYP2C8 IM Mean	0	UGT1A5 UM Mean	0	MechDermA - Face		CYP2D6 Mean Turnover Rate	0.03	Lobe Distribution Percentage (%) Blood Flow Rate RM	8.6	Lung : KpALB	0.212									Additional Organ FcRn	1			Target10 Name	Target 10
	Abundance : UGT1A4 PM Freq	0	Abundance : CYP2C8 IM CV (%)	0	UGT1A5 UM Mean CV (%)	0	SCorneum Thickness (µm) : Male	14.3	CYP2D6 Mean Turnover Rate CV (%)	20	Lobe Distribution Percentage (%) Blood Flow Rate RM	34.9	Lung : KpLPP	0.168									Pancreas FcRn	1.69464			Target10 Rmax (µM)	0
	Abundance : UGT1A4 UM Freq	0	Turnover rate : CYP2C8 Mean	0.0301	UGT1A5 IM Mean	0	SCorneum Thickness CV (%) : Male	23	Colon CYP2D6 EM Mean	0	Lobe Distribution Percentage (%) Blood Flow Rate RM	8.6	Muscle : IW (%)	66.9									Adipose PS	0			Target10 Rmax CV (%)	30
	Abundance : UGT1A4 IM Freq	0	Turnover rate : CYP2C8 CV (%)	56	UGT1A5 IM Mean CV (%)	0	SCorneum Thickness (µm) : Female	15.6	Colon CYP2D6 EM CV (%)	0	Lobe Distribution Percentage (%) Blood Flow Rate RM	5	Muscle : AP (mg/g)	2.49									Bone PS	0.1			Target10 Kdeg (1/h)	0
	Abundance : UGT1A5 PM Freq	0	Abundance : CYP2C9 EM Mean	73	UGT1A5 Absolute Abundance	0	SCorneum Thickness CV (%) : Female	21	Colon CYP2D6 PM Mean	N/A	Lobe Distribution Percentage (%) Blood Flow Rate RM	2.5	Muscle : KpALB	0.034									Brain PS	0			Target10 Kdeg CV (%)	30
	Abundance : UGT1A5 UM Freq	0	Abundance : CYP2C9 EM CV (%)	54	UGT1A5 Mean Turnover Rate	1e-06	SCorneum Fat (%) : Male	7.2	Colon CYP2D6 PM Mean CV (%)	N/A	Lobe Distribution Percentage (%) Alveoli Volume RM	26.3	Muscle : KpLPP	0.059									Gut PS	0			Target10 Kshed (1/hr)	0
	Abundance : UGT1A5 IM Freq	0	Abundance : CYP2C9 PM Mean	29	UGT1A5 Mean Turnover Rate CV (%)	30	SCorneum Fat CV (%) : Male	12	Colon CYP2D6 UM Mean	N/A	Lobe Distribution Percentage (%) Alveoli Volume RM	10.5	Skin : IW (%)	9.47									Heart PS	0			Target10 Kshed CV (%)	30
	Abundance : UGT1A6 PM Freq	0	Abundance : CYP2C9 PM CV (%)	73	UGT1A6 EM Mean	1	SCorneum Fat (%) : Female	7.2	Colon CYP2D6 UM Mean CV (%)	N/A	Lobe Distribution Percentage (%) Alveoli Volume RM	15.8	Skin : AP (mg/g)	1.32									Kidney PS	0			Target10 Lambda (1/h)	0
	Abundance : UGT1A6 UM Freq	0	Abundance : CYP2C9 UM Mean	0	UGT1A6 EM Mean CV (%)	50	SCorneum Fat CV (%) : Female	12	Colon CYP2D6 IM Mean	N/A	Lobe Distribution Percentage (%) Alveoli Volume RM	26.3	Skin : KpALB	0.277									Liver PS	0			Target11 Name	Target 11
	Abundance : UGT1A6 IM Freq	0	Abundance : CYP2C9 UM CV (%)	0	UGT1A6 PM Mean	0	VEpidermis Thickness (µm) : Male	38.9	Colon CYP2D6 IM Mean CV (%)	N/A	Lobe Distribution Percentage (%) Alveoli Volume RM	21	Skin : KpLPP	0.096									Lung PS	0			Target11 Rmax (µM)	0
	Abundance : UGT1A7 PM Freq	0	Abundance : CYP2C9 IM Mean	0	UGT1A6 PM Mean CV (%)	0	VEpidermis Thickness CV (%) : Male	50	Colon CYP2D6 Mean Turnover Rate	N/A	Lobe Distribution Percentage (%) Alveoli Volume RM	50	Spleen : IW (%)	57.9									Muscle PS	0			Target11 Rmax CV (%)	30
	Abundance : UGT1A7 UM Freq	0	Abundance : CYP2C9 IM CV (%)	0	UGT1A6 UM Mean	0	VEpidermis Thickness (µm) : Female	37.4	Colon CYP2D6 Mean Turnover Rate CV (%)	N/A	Lobe Distribution Percentage (%) Alveoli Volume RM	50	Spleen : AP (mg/g)	2.81									Skin PS	0			Target11 Kdeg (1/h)	0
	Abundance : UGT1A7 IM Freq	0	Turnover rate : CYP2C9 Mean	0.0067	UGT1A6 UM Mean CV (%)	0	VEpidermis Thickness CV (%) : Female	21	CYP2J2 EM Mean	1.4	Lobe Distribution Percentage (%) Absorption Area RM	26.3	Spleen : KpALB	0.097									Spleen PS	0			Target11 Kdeg CV (%)	30
	Abundance : UGT1A8 PM Freq	0	Turnover rate : CYP2C9 CV (%)	56	UGT1A6 IM Mean	0	VEpidermis Fat (%) : Male	3	CYP2J2 EM CV (%)	60	Lobe Distribution Percentage (%) Absorption Area RM	10.5	Spleen : KpLPP	0.207									Additional Organ PS	0			Target11 Kshed (1/hr)	0
	Abundance : UGT1A8 UM Freq	0	Abundance : CYP2C18 EM Mean	1	UGT1A6 IM Mean CV (%)	0	VEpidermis Fat CV (%) : Male	30	CYP2J2 PM Mean	0	Lobe Distribution Percentage (%) Absorption Area RM	15.8	Plasma : IW (%)	0									Pancreas PS	0			Target11 Kshed CV (%)	30
	Abundance : UGT1A8 IM Freq	0	Abundance : CYP2C18 EM CV (%)	106	UGT1A6 Absolute Abundance	3.6	VEpidermis Fat (%) : Female	3	CYP2J2 PM Mean CV (%)	0	Lobe Distribution Percentage (%) Absorption Area RM	26.3	Plasma : AP (mg/g)	0.04									Adipose fCLcat	0.05			Target11 Lambda (1/h)	0
	Abundance : UGT1A9 PM Freq	0.04	Abundance : CYP2C18 PM Mean	0	UGT1A6 Mean Turnover Rate	1e-06	VEpidermis Fat CV (%) : Female	30	CYP2J2 UM Mean	0	Lobe Distribution Percentage (%) Absorption Area RM	21	RBC : IW (%)	66.6									Bone fCLcat	0.05			Target12 Name	Target 12
	Abundance : UGT1A9 UM Freq	0	Abundance : CYP2C18 PM CV (%)	0	UGT1A6 Mean Turnover Rate CV (%)	30			CYP2J2 UM Mean CV (%)	0	Lobe Distribution Percentage (%) Absorption Area RM	50	RBC : AP (mg/g)	0.44									Brain fCLcat	0.0009			Target12 Rmax (µM)	0
	Abundance : UGT1A9 IM Freq	0	Abundance : CYP2C18 UM Mean	0	UGT1A7 EM Mean	1	MPMLA - Forehead		CYP2J2 IM Mean	0	Lobe Distribution Percentage (%) Absorption Area RM	50	Pancreas : IW (%)	66.4									Gut fCLcat	0.025			Target12 Rmax CV (%)	30
	Abundance : UGT1A10 PM Freq	0	Abundance : CYP2C18 UM CV (%)	0	UGT1A7 EM Mean CV (%)	50	Skin surface pH : Male	4.7	CYP2J2 IM Mean CV (%)	0	Lobe Distribution Percentage (%) Pulmonary Capilliary Blood Volume RM	16.66	Pancreas : AP (mg/g)	1.67									Heart fCLcat	0.0054			Target12 Kdeg (1/h)	0
	Abundance : UGT1A10 UM Freq	0	Abundance : CYP2C18 IM Mean	0	UGT1A7 PM Mean	0	Skin surface pH CV (%) : Male	7.8	CYP2J2 Mean Turnover Rate	0.03	Lobe Distribution Percentage (%) Pulmonary Capilliary Blood Volume RM	16.67	Pancreas : KpALB	0.06									Kidney fCLcat	0.041			Target12 Kdeg CV (%)	30
	Abundance : UGT1A10 IM Freq	0	Abundance : CYP2C18 IM CV (%)	0	UGT1A7 PM Mean CV (%)	0	Skin surface pH : Female	4.8	CYP2J2 Mean Turnover Rate CV (%)	20	Lobe Distribution Percentage (%) Pulmonary Capilliary Blood Volume RM	16.67	Pancreas : KpLPP	0.06									Liver fCLcat	0.41			Target12 Kshed (1/hr)	0
	Abundance : UGT2B4 PM Freq	0	Turnover rate : CYP2C18 Mean	0.0267	UGT1A7 UM Mean	0	Skin surface pH CV (%) : Female	8	Colon CYP2J2 EM Mean	0	Lobe Distribution Percentage (%) Pulmonary Capilliary Blood Volume RM	16.67	Adipose Volume Scalar	1									Lung fCLcat	0.0057			Target12 Kshed CV (%)	30
	Abundance : UGT2B4 UM Freq	0	Turnover rate : CYP2C18 CV (%)	56	UGT1A7 UM Mean CV (%)	0	Skin temperature (°C) : Male	32	Colon CYP2J2 EM CV (%)	0	Lobe Distribution Percentage (%) Pulmonary Capilliary Blood Volume RM	16.67	Bone Volume Scalar	1									Muscle fCLcat	0.1			Target12 Lambda (1/h)	0
	Abundance : UGT2B4 IM Freq	0	Abundance : CYP2C19 EM Mean	14	UGT1A7 IM Mean	0	Skin temperature CV (%) : Male	0	Colon CYP2J2 PM Mean	N/A	Lobe Distribution Percentage (%) Pulmonary Capilliary Blood Volume RM	8.33	Brain Volume Scalar	1									Skin fCLcat	0.27			Target13 Name	Target 13
	Abundance : UGT2B7 PM Freq	0	Abundance : CYP2C19 EM CV (%)	106	UGT1A7 IM Mean CV (%)	0	Skin temperature (°C) : Female	32	Colon CYP2J2 PM Mean CV (%)	N/A	Lobe Distribution Percentage (%) Pulmonary Capilliary Blood Volume RM	8.33	Gut Volume Scalar	1									Spleen fCLcat	0.018			Target13 Rmax (µM)	0
	Abundance : UGT2B7 UM Freq	0	Abundance : CYP2C19 PM Mean	0	UGT1A7 Absolute Abundance	13	Skin temperature CV (%) : Female	0	Colon CYP2J2 UM Mean	N/A	Lobe Distribution Percentage (%) Pulmonary Mass Volume RM	16.66	Heart Volume Scalar	1									Additional Organ fCLcat	0.01			Target13 Rmax CV (%)	30
	Abundance : UGT2B7 IM Freq	0	Abundance : CYP2C19 PM CV (%)	0	UGT1A7 Mean Turnover Rate	1e-06	Shape of corneocyte : Male	Cuboid (brick)	Colon CYP2J2 UM Mean CV (%)	N/A	Lobe Distribution Percentage (%) Pulmonary Mass Volume RM	16.67	Kidney Volume Scalar	1									Pancreas fCLcat	0.005			Target13 Kdeg (1/h)	0
	Abundance : UGT2B10 PM Freq	0	Abundance : CYP2C19 UM Mean	0	UGT1A7 Mean Turnover Rate CV (%)	30	Shape of corneocyte : Female	Cuboid (brick)	Colon CYP2J2 IM Mean	N/A	Lobe Distribution Percentage (%) Pulmonary Mass Volume RM	16.67	Liver Volume Scalar	1									Kup Full PBPK (1/h)	0.0298			Target13 Kdeg CV (%)	30
	Abundance : UGT2B10 UM Freq	0	Abundance : CYP2C19 UM CV (%)	0	UGT1A8 EM Mean	1	Number of SC layers : Male	12	Colon CYP2J2 IM Mean CV (%)	N/A	Lobe Distribution Percentage (%) Pulmonary Mass Volume RM	16.67	Lung Volume Scalar	1									Krc Full PBPK (1/h)	3.605			Target13 Kshed (1/hr)	0
	Abundance : UGT2B10 IM Freq	0	Abundance : CYP2C19 IM Mean	0	UGT1A8 EM Mean CV (%)	50	Number of SC layers CV (%) : Male	8.4	Colon CYP2J2 Mean Turnover Rate	N/A	Lobe Distribution Percentage (%) Pulmonary Mass Volume RM	16.67	Muscle Volume Scalar	1									Krc,complex Full PBPK (1/h)	7.21			Target13 Kshed CV (%)	30
	Abundance : UGT2B11 PM Freq	0	Abundance : CYP2C19 IM CV (%)	0	UGT1A8 PM Mean	0	Number of SC layers : Female	12	Colon CYP2J2 Mean Turnover Rate CV (%)	N/A	Lobe Distribution Percentage (%) Pulmonary Mass Volume RM	8.33	Skin Volume Scalar	1									Additional Clearance Full PBPK (L/h)	0.0020407			Target13 Lambda (1/h)	0
	Abundance : UGT2B11 UM Freq	0	Turnover rate : CYP2C19 Mean	0.0267	UGT1A8 PM Mean CV (%)	0	Number of SC layers CV (%) : Female	8.4	CYP3A4 EM Mean	66.2	Lobe Distribution Percentage (%) Pulmonary Mass Volume RM	8.33	Spleen Volume Scalar	1									Additional Clearance Full PBPK CV (%)	10			Target14 Name	Target 14
	Abundance : UGT2B11 IM Freq	0	Turnover rate : CYP2C19 CV (%)	56	UGT1A8 UM Mean	0	Water density (gm/cm3) : Male	1	CYP3A4 EM CV (%)	60	Lobe Distribution Percentage (%) Epithelial Lining Fluid Volume RM	16.66	Plasma Volume Scalar	1													Target14 Rmax (µM)	0
	Abundance : UGT2B15 PM Freq	0.28	Abundance : CYP2D6 EM Mean	8	UGT1A8 UM Mean CV (%)	0	Water density CV (%) : Male	0	CYP3A4 PM Mean	0	Lobe Distribution Percentage (%) Epithelial Lining Fluid Volume RM	16.67	Membrane potential : Adipose (mV)	-41													Target14 Rmax CV (%)	30
	Abundance : UGT2B15 UM Freq	0	Abundance : CYP2D6 EM CV (%)	61	UGT1A8 IM Mean	0	Water density (gm/cm3) : Female	1	CYP3A4 PM Mean CV (%)	0	Lobe Distribution Percentage (%) Epithelial Lining Fluid Volume RM	16.67	Membrane potential : Bone (mV)	-41													Target14 Kdeg (1/h)	0
	Abundance : UGT2B15 IM Freq	0.51	Abundance : CYP2D6 PM Mean	0	UGT1A8 IM Mean CV (%)	0	Water density CV (%) : Female	0	CYP3A4 UM Mean	0	Lobe Distribution Percentage (%) Epithelial Lining Fluid Volume RM	16.67	Membrane potential : Brain (mV)	-41													Target14 Kdeg CV (%)	30
	Abundance : UGT2B17 PM Freq	0.09	Abundance : CYP2D6 PM CV (%)	0	UGT1A8 Absolute Abundance	4.9	SC lipids density (gm/cm3) : Male	0.9	CYP3A4 UM Mean CV (%)	0	Lobe Distribution Percentage (%) Epithelial Lining Fluid Volume RM	16.67	Membrane potential : Gut (mV)	-41													Target14 Kshed (1/hr)	0
	Abundance : UGT2B17 UM Freq	0	Abundance : CYP2D6 UM Mean	16	UGT1A8 Mean Turnover Rate	1e-06	SC lipids density CV (%) : Male	0	CYP3A4 IM Mean	0	Lobe Distribution Percentage (%) Epithelial Lining Fluid Volume RM	8.33	Membrane potential : Heart (mV)	-41													Target14 Kshed CV (%)	30
	Abundance : UGT2B17 IM Freq	0.36	Abundance : CYP2D6 UM CV (%)	61	UGT1A8 Mean Turnover Rate CV (%)	30	SC lipids density (gm/cm3) : Female	0.9	CYP3A4 IM Mean CV (%)	0	Lobe Distribution Percentage (%) Epithelial Lining Fluid Volume RM	8.33	Membrane potential : Kidney (mV)	-60													Target14 Lambda (1/h)	0
	Abundance : UGT2B28 PM Freq	0	Abundance : CYP2D6 IM Mean	0	UGT1A9 EM Mean	1	SC lipids density CV (%) : Female	0	CYP3A4 Mean Turnover Rate	0.03	Lobe Distribution Percentage (%) Ventillation Rate RT	25.9	Membrane potential : Liver (mV)	-41													Target15 Name	Target 15
	Abundance : UGT2B28 UM Freq	0	Abundance : CYP2D6 IM CV (%)	0	UGT1A9 EM Mean CV (%)	50	SC proteins density (gm/cm3) : Male	1.37	CYP3A4 Mean Turnover Rate CV (%)	20	Lobe Distribution Percentage (%) Ventillation Rate RT	12.4	Membrane potential : Lung (mV)	-41													Target15 Rmax (µM)	0
	Abundance : UGT2B28 IM Freq	0	Turnover rate : CYP2D6 Mean	0.0099	UGT1A9 PM Mean	0.07	SC proteins density CV (%) : Male	0	Colon CYP3A4 EM Mean	1.99	Lobe Distribution Percentage (%) Ventillation Rate RT	14.8	Membrane potential : Muscle (mV)	-41													Target15 Rmax CV (%)	30
	Abundance : User UGT1 PM Freq	0	Turnover rate : CYP2D6 CV (%)	56	UGT1A9 PM Mean CV (%)	50	SC proteins density (gm/cm3) : Female	1.37	Colon CYP3A4 EM CV (%)	30	Lobe Distribution Percentage (%) Ventillation Rate RT	32.1	Membrane potential : Skin (mV)	-41													Target15 Kdeg (1/h)	0
	Abundance : User UGT1 UM Freq	0	Abundance : CYP2E1 EM Mean	61	UGT1A9 UM Mean	2.6	SC proteins density CV (%) : Female	0	Colon CYP3A4 PM Mean	N/A	Lobe Distribution Percentage (%) Ventillation Rate RT	14.8	Membrane potential : Spleen (mV)	-41													Target15 Kdeg CV (%)	30
	Abundance : User UGT1 IM Freq	0	Abundance : CYP2E1 EM CV (%)	61	UGT1A9 UM Mean CV (%)	0	Intercellular lipid thickness of SC (µm) : Male	0.091	Colon CYP3A4 PM Mean CV (%)	N/A	Lobe Distribution Percentage (%) Ventillation Rate RT	100	Membrane potential : RBC (mV)	-10													Target15 Kshed (1/hr)	0
	Abundance : User Cyt1 PM Freq	0	Abundance : CYP2E1 PM Mean	0	UGT1A9 IM Mean	0.19	Intercellular lipid thickness of SC CV (%) : Male	0	Colon CYP3A4 UM Mean	N/A	Lobe Distribution Percentage (%) Ventillation Rate RT	100	Membrane potential : Pancreas (mV)	-41													Target15 Kshed CV (%)	30
	Abundance : User Cyt1 UM Freq	0	Abundance : CYP2E1 PM CV (%)	0	UGT1A9 IM Mean CV (%)	50	Intercellular lipid thickness of SC (µm) : Female	0.091	Colon CYP3A4 UM Mean CV (%)	N/A	Lobe Distribution Percentage (%) Blood Flow Rate RT	2.5	Ve (Fraction Tissue volume) : Lung	0.0050985													Target15 Lambda (1/h)	0
	Abundance : User Cyt1 IM Freq	0	Abundance : CYP2E1 UM Mean	0	UGT1A9 Absolute Abundance	79	Intercellular lipid thickness of SC CV (%) : Female	0	Colon CYP3A4 IM Mean	N/A	Lobe Distribution Percentage (%) Blood Flow Rate RT	11.8	Ve (Fraction Tissue volume) : Heart	0.001155													Target16 Name	Target 16
	Abundance : User Cyt2 PM Freq	0	Abundance : CYP2E1 UM CV (%)	0	UGT1A9 Mean Turnover Rate	1e-06	Tortuosity of lipid diffusion pathway of SC : Male	12.7	Colon CYP3A4 IM Mean CV (%)	N/A	Lobe Distribution Percentage (%) Blood Flow Rate RT	8.6	Ve (Fraction Tissue volume) : Brain	0.0001375													Target16 Rmax (µM)	0
	Abundance : User Cyt2 UM Freq	0	Abundance : CYP2E1 IM Mean	0	UGT1A9 Mean Turnover Rate CV (%)	30	Tortuosity of lipid diffusion pathway of SC CV (%) : Male	18	Colon CYP3A4 Mean Turnover Rate	N/A	Lobe Distribution Percentage (%) Blood Flow Rate RT	34.9	Ve (Fraction Tissue volume) : Muscle	0.001375													Target16 Rmax CV (%)	30
	Abundance : User Cyt2 IM Freq	0	Abundance : CYP2E1 IM CV (%)	0	UGT1A10 EM Mean	1	Tortuosity of lipid diffusion pathway of SC : Female	12.7	Colon CYP3A4 Mean Turnover Rate CV (%)	N/A	Lobe Distribution Percentage (%) Blood Flow Rate RT	8.6	Ve (Fraction Tissue volume) : Skin	0.00275													Target16 Kdeg (1/h)	0
	Abundance : User Cyt3 PM Freq	0	Turnover rate : CYP2E1 Mean	0.0176	UGT1A10 EM Mean CV (%)	50	Tortuosity of lipid diffusion pathway of SC CV (%) : Female	18	CYP3A5 EM Mean	24.6	Lobe Distribution Percentage (%) Blood Flow Rate RT	5	Ve (Fraction Tissue volume) : Adipose	0.001925													Target16 Kdeg CV (%)	30
	Abundance : User Cyt3 UM Freq	0	Turnover rate : CYP2E1 CV (%)	63	UGT1A10 PM Mean	0	Hair follicle diameter (µm) : Male	65.4	CYP3A5 EM CV (%)	60	Lobe Distribution Percentage (%) Blood Flow Rate RT	2.5	Ve (Fraction Tissue volume) : Bone	0.001375													Target16 Kshed (1/hr)	0
	Abundance : User Cyt3 IM Freq	0	Abundance : CYP2J2 EM Mean	1.2	UGT1A10 PM Mean CV (%)	0	Hair follicle diameter CV (%) : Male	83	CYP3A5 PM Mean	0	Lobe Distribution Percentage (%) Alveoli Volume RT	26.3	Ve (Fraction Tissue volume) : Kidney	0.001925													Target16 Kshed CV (%)	30
	Abundance : User Cyt4 PM Freq	0	Abundance : CYP2J2 EM CV (%)	175	UGT1A10 UM Mean	0	Hair follicle diameter (µm) : Female	65.4	CYP3A5 PM Mean CV (%)	0	Lobe Distribution Percentage (%) Alveoli Volume RT	10.5	Ve (Fraction Tissue volume) : ByPass	0													Target16 Lambda (1/h)	0
	Abundance : User Cyt4 UM Freq	0	Abundance : CYP2J2 PM Mean	0	UGT1A10 UM Mean CV (%)	0	Hair follicle diameter CV (%) : Female	83	CYP3A5 UM Mean	0	Lobe Distribution Percentage (%) Alveoli Volume RT	15.8	Ve (Fraction Tissue volume) : Gut	0.001375													Target17 Name	Target 17
	Abundance : User Cyt4 IM Freq	0	Abundance : CYP2J2 PM CV (%)	0	UGT1A10 IM Mean	0	Hair follicle density (N/cm2) : Male	292	CYP3A5 UM Mean CV (%)	0	Lobe Distribution Percentage (%) Alveoli Volume RT	26.3	Ve (Fraction Tissue volume) : Spleen	0.001375													Target17 Rmax (µM)	0
	Abundance : CES1 PM Freq	0.001	Abundance : CYP2J2 UM Mean	0	UGT1A10 IM Mean CV (%)	0	Hair follicle density CV (%) : Male	16	CYP3A5 IM Mean	0	Lobe Distribution Percentage (%) Alveoli Volume RT	21	Ve (Fraction Tissue volume) : Pancreas	0.001375													Target17 Rmax CV (%)	30
	Abundance : CES1 UM Freq	0	Abundance : CYP2J2 UM CV (%)	0	UGT1A10 Absolute Abundance	17	Hair follicle density (N/cm2) : Female	292	CYP3A5 IM Mean CV (%)	0	Lobe Distribution Percentage (%) Alveoli Volume RT	50	Ve (Fraction Tissue volume) : Liver	0.001375													Target17 Kdeg (1/h)	0
	Abundance : CES1 IM Freq	0	Abundance : CYP2J2 IM Mean	0	UGT1A10 Mean Turnover Rate	1e-06	Hair follicle density CV (%) : Female	16	CYP3A5 Mean Turnover Rate	0.03	Lobe Distribution Percentage (%) Alveoli Volume RT	50	Subcell Membrane potential : Adipose (mV)	10													Target17 Kdeg CV (%)	30
	Abundance : CES2 PM Freq	0	Abundance : CYP2J2 IM CV (%)	0	UGT1A10 Mean Turnover Rate CV (%)	30	Hair shaft diameter (µm) : Male	15.9	CYP3A5 Mean Turnover Rate CV (%)	20	Lobe Distribution Percentage (%) Absorption Area RT	26.3	Subcell Membrane potential : Bone (mV)	10													Target17 Kshed (1/hr)	0
	Abundance : CES2 UM Freq	0	Turnover rate : CYP2J2 Mean	0.0194	UGT2B4 EM Mean	1	Hair shaft diameter CV (%) : Male	57	Colon CYP3A5 EM Mean	0.74	Lobe Distribution Percentage (%) Absorption Area RT	10.5	Subcell Membrane potential : Brain (mV)	10													Target17 Kshed CV (%)	30
	Abundance : CES2 IM Freq	0	Turnover rate : CYP2J2 CV (%)	56	UGT2B4 EM Mean CV (%)	50	Hair shaft diameter (µm) : Female	15.9	Colon CYP3A5 EM CV (%)	30	Lobe Distribution Percentage (%) Absorption Area RT	15.8	Subcell Membrane potential : Gut (mV)	10													Target17 Lambda (1/h)	0
	Abundance : User ES PM Freq	0	Abundance : CYP3A4 EM Mean	137	UGT2B4 PM Mean	0	Hair shaft diameter CV (%) : Female	57	Colon CYP3A5 PM Mean	N/A	Lobe Distribution Percentage (%) Absorption Area RT	26.3	Subcell Membrane potential : Heart (mV)	10													Target18 Name	Target 18
	Abundance : User ES UM Freq	0	Abundance : CYP3A4 EM CV (%)	41	UGT2B4 PM Mean CV (%)	0	Sebum viscosity (centipose) : Male	40	Colon CYP3A5 PM Mean CV (%)	N/A	Lobe Distribution Percentage (%) Absorption Area RT	21	Subcell Membrane potential : Kidney (mV)	10													Target18 Rmax (µM)	0
	Abundance : User ES IM Freq	0	Abundance : CYP3A4 PM Mean	0	UGT2B4 UM Mean	0	Sebum viscosity CV (%) : Male	0	Colon CYP3A5 UM Mean	N/A	Lobe Distribution Percentage (%) Absorption Area RT	50	Subcell Membrane potential : Liver (mV)	10													Target18 Rmax CV (%)	30
	Abundance : Plasma ES PM Freq	0	Abundance : CYP3A4 PM CV (%)	0	UGT2B4 UM Mean CV (%)	0	Sebum viscosity (centipose) : Female	40	Colon CYP3A5 UM Mean CV (%)	N/A	Lobe Distribution Percentage (%) Absorption Area RT	50	Subcell Membrane potential : Lung (mV)	10													Target18 Kdeg (1/h)	0
	Abundance : Plasma ES UM Freq	0	Abundance : CYP3A4 UM Mean	0	UGT2B4 IM Mean	0	Sebum viscosity CV (%) : Female	0	Colon CYP3A5 IM Mean	N/A	Lobe Distribution Percentage (%) Pulmonary Capilliary Blood Volume RT	16.66	Subcell Membrane potential : Muscle (mV)	10													Target18 Kdeg CV (%)	30
	Abundance : Plasma ES IM Freq	0	Abundance : CYP3A4 UM CV (%)	0	UGT2B4 IM Mean CV (%)	0	Corneocyte pH [top] : Male	6.8	Colon CYP3A5 IM Mean CV (%)	N/A	Lobe Distribution Percentage (%) Pulmonary Capilliary Blood Volume RT	16.67	Subcell Membrane potential : Skin (mV)	10													Target18 Kshed (1/hr)	0
	Abundance : ABCB1 (P-gp/MDR1) PT Freq	0	Abundance : CYP3A4 IM Mean	0	UGT2B4 Absolute Abundance	0.3	Corneocyte pH [top] CV (%) : Male	0	Colon CYP3A5 Mean Turnover Rate	N/A	Lobe Distribution Percentage (%) Pulmonary Capilliary Blood Volume RT	16.67	Subcell Membrane potential : Spleen (mV)	10													Target18 Kshed CV (%)	30
	Abundance : ABCB1 (P-gp/MDR1) IT Freq	0	Abundance : CYP3A4 IM CV (%)	0	UGT2B4 Mean Turnover Rate	1e-06	Corneocyte pH [top] : Female	6.8	Colon CYP3A5 Mean Turnover Rate CV (%)	N/A	Lobe Distribution Percentage (%) Pulmonary Capilliary Blood Volume RT	16.67	Subcell Membrane potential : RBC (mV)	10													Target18 Lambda (1/h)	0
	Abundance : ABCB1 (P-gp/MDR1) UT Freq	0	Turnover rate : CYP3A4 Mean	0.0193	UGT2B4 Mean Turnover Rate CV (%)	30	Corneocyte pH [top] CV (%) : Female	0	UGT1A1 EM Mean	1	Lobe Distribution Percentage (%) Pulmonary Capilliary Blood Volume RT	16.67	Subcell Membrane potential : Pancreas (mV)	10													Target19 Name	Target 19
	Abundance : ABCB11 (BSEP) PT Freq	0	Turnover rate : CYP3A4 CV (%)	68	UGT2B7 EM Mean	1	Corneocyte thickness [top] (µm) : Male	0.71	UGT1A1 EM Mean CV (%)	60	Lobe Distribution Percentage (%) Pulmonary Capilliary Blood Volume RT	8.33	Local pH (IW) : Adipose	7													Target19 Rmax (µM)	0
	Abundance : ABCB11 (BSEP) IT Freq	0	Abundance : CYP3A5 EM Mean	103	UGT2B7 EM Mean CV (%)	50	Corneocyte thickness [top] CV (%) : Male	36	UGT1A1 PM Mean	0.42	Lobe Distribution Percentage (%) Pulmonary Capilliary Blood Volume RT	8.33	Local pH (IW) : Bone	7													Target19 Rmax CV (%)	30
	Abundance : ABCB11 (BSEP) UT Freq	0	Abundance : CYP3A5 EM CV (%)	65	UGT2B7 PM Mean	0	Corneocyte thickness [top] (µm) : Female	0.71	UGT1A1 PM Mean CV (%)	60	Lobe Distribution Percentage (%) Pulmonary Mass Volume RT	16.66	Local pH (IW) : Brain	7.12													Target19 Kdeg (1/h)	0
	Abundance : ABCC1 (MRP1) PT Freq	0	Abundance : CYP3A5 PM Mean	0	UGT2B7 PM Mean CV (%)	0	Corneocyte thickness [top] CV (%) : Female	36	UGT1A1 UM Mean	1.46	Lobe Distribution Percentage (%) Pulmonary Mass Volume RT	16.67	Local pH (IW) : Gut	7													Target19 Kdeg CV (%)	30
	Abundance : ABCC1 (MRP1) IT Freq	0	Abundance : CYP3A5 PM CV (%)	0	UGT2B7 UM Mean	0	Corneocyte width [top] (µm) : Male	27.7	UGT1A1 UM Mean CV (%)	60	Lobe Distribution Percentage (%) Pulmonary Mass Volume RT	16.67	Local pH (IW) : Heart	7													Target19 Kshed (1/hr)	0
	Abundance : ABCC1 (MRP1) UT Freq	0	Abundance : CYP3A5 UM Mean	0	UGT2B7 UM Mean CV (%)	0	Corneocyte width [top] CV (%) : Male	9.2	UGT1A1 IM Mean	0.72	Lobe Distribution Percentage (%) Pulmonary Mass Volume RT	16.67	Local pH (IW) : Kidney	7.2													Target19 Kshed CV (%)	30
	Abundance : ABCC2 (MRP2) PT Freq	0	Abundance : CYP3A5 UM CV (%)	0	UGT2B7 IM Mean	0	Corneocyte width [top] (µm) : Female	27.7	UGT1A1 IM Mean CV (%)	60	Lobe Distribution Percentage (%) Pulmonary Mass Volume RT	16.67	Local pH (IW) : Liver	7													Target19 Lambda (1/h)	0
	Abundance : ABCC2 (MRP2) IT Freq	0	Abundance : CYP3A5 IM Mean	0	UGT2B7 IM Mean CV (%)	0	Corneocyte width [top] CV (%) : Female	9.2	UGT1A1 Absolute Abundance	8.5	Lobe Distribution Percentage (%) Pulmonary Mass Volume RT	8.33	Local pH (IW) : Lung	6.7													Target20 Name	Target 20
	Abundance : ABCC2 (MRP2) UT Freq	0	Abundance : CYP3A5 IM CV (%)	0	UGT2B7 Absolute Abundance	48	Corneocyte length [top] (µm) : Male	34.2	UGT1A3 EM Mean	1	Lobe Distribution Percentage (%) Pulmonary Mass Volume RT	8.33	Local pH (IW) : Muscle	7													Target20 Rmax (µM)	0
	Abundance : ABCC3 (MRP3) PT Freq	0	Turnover rate : CYP3A5 Mean	0.0193	UGT2B7 Mean Turnover Rate	1e-06	Corneocyte length [top] CV (%) : Male	4.1	UGT1A3 EM Mean CV (%)	60	Lobe Distribution Percentage (%) Epithelial Lining Fluid Volume RT	16.66	Local pH (IW) : Skin	7													Target20 Rmax CV (%)	30
	Abundance : ABCC3 (MRP3) IT Freq	0	Turnover rate : CYP3A5 CV (%)	68	UGT2B7 Mean Turnover Rate CV (%)	30	Corneocyte length [top] (µm) : Female	34.2	UGT1A3 PM Mean	0	Lobe Distribution Percentage (%) Epithelial Lining Fluid Volume RT	16.67	Local pH (IW) : Spleen	7													Target20 Kdeg (1/h)	0
	Abundance : ABCC3 (MRP3) UT Freq	0	Abundance : CYP3A7 EM Mean	35.4	UGT2B10 EM Mean	1	Corneocyte length [top] CV (%) : Female	4.1	UGT1A3 PM Mean CV (%)	0	Lobe Distribution Percentage (%) Epithelial Lining Fluid Volume RT	16.67	Local pH (IW) : RBC	7.22													Target20 Kdeg CV (%)	30
	Abundance : ABCC4 (MRP4) PT Freq	0	Abundance : CYP3A7 EM CV (%)	61	UGT2B10 EM Mean CV (%)	50	Hydration level (% water volume) [top] : Male	35.5	UGT1A3 UM Mean	0	Lobe Distribution Percentage (%) Epithelial Lining Fluid Volume RT	16.67	Local pH (IW) : Pancreas	7													Target20 Kshed (1/hr)	0
	Abundance : ABCC4 (MRP4) IT Freq	0	Abundance : CYP3A7 PM Mean	0	UGT2B10 PM Mean	0	Hydration level (% water volume) [top] CV (%) : Male	17	UGT1A3 UM Mean CV (%)	0	Lobe Distribution Percentage (%) Epithelial Lining Fluid Volume RT	16.67	Subcell pH : Adipose	5													Target20 Kshed CV (%)	30
	Abundance : ABCC4 (MRP4) UT Freq	0	Abundance : CYP3A7 PM CV (%)	0	UGT2B10 PM Mean CV (%)	0	Hydration level (% water volume) [top] : Female	35.5	UGT1A3 IM Mean	0	Lobe Distribution Percentage (%) Epithelial Lining Fluid Volume RT	8.33	Subcell pH : Bone	5													Target20 Lambda (1/h)	0
	Abundance : ABCC6 (MRP6) PT Freq	0	Abundance : CYP3A7 UM Mean	0	UGT2B10 UM Mean	0	Hydration level (% water volume) [top] CV (%) : Female	17	UGT1A3 IM Mean CV (%)	0	Lobe Distribution Percentage (%) Epithelial Lining Fluid Volume RT	8.33	Subcell pH : Brain	5
	Abundance : ABCC6 (MRP6) IT Freq	0	Abundance : CYP3A7 UM CV (%)	0	UGT2B10 UM Mean CV (%)	0	SC lipid viscosity [top] (centipose) : Male	75	UGT1A3 Absolute Abundance	0.4	Lobe Distribution Percentage (%) Ventillation Rate LL	25.9	Subcell pH : Gut	5
	Abundance : ABCC6 (MRP6) UT Freq	0	Abundance : CYP3A7 IM Mean	0	UGT2B10 IM Mean	0	SC lipid viscosity [top] CV (%) : Male	0	UGT1A4 EM Mean	1	Lobe Distribution Percentage (%) Ventillation Rate LL	12.4	Subcell pH : Heart	5
	Abundance : ABCG2 (BCRP) PT Freq	0	Abundance : CYP3A7 IM CV (%)	0	UGT2B10 IM Mean CV (%)	0	SC lipid viscosity [top] (centipose) : Female	75	UGT1A4 EM Mean CV (%)	60	Lobe Distribution Percentage (%) Ventillation Rate LL	14.8	Subcell pH : Kidney	5
	Abundance : ABCG2 (BCRP) IT Freq	0	Turnover rate : CYP3A7 Mean	0.019	UGT2B10 Absolute Abundance	0	SC lipid viscosity [top] CV (%) : Female	0	UGT1A4 PM Mean	0	Lobe Distribution Percentage (%) Ventillation Rate LL	32.1	Subcell pH : Liver	5
	Abundance : ABCG2 (BCRP) UT Freq	0	Turnover rate : CYP3A7 CV (%)	68	UGT2B10 Mean Turnover Rate	1e-06	Corneocyte pH [upper mid] : Male	6.8	UGT1A4 PM Mean CV (%)	0	Lobe Distribution Percentage (%) Ventillation Rate LL	14.8	Subcell pH : Lung	5
	Abundance : SLC2A2 (GLUT2) PT Freq	0	3A4 M / F difference	Same	UGT2B10 Mean Turnover Rate CV (%)	30	Corneocyte pH [upper mid] CV (%) : Male	0	UGT1A4 UM Mean	0	Lobe Distribution Percentage (%) Ventillation Rate LL	100	Subcell pH : Muscle	5
	Abundance : SLC2A2 (GLUT2) IT Freq	0	Abundance : 3A4 Mean : Male	137	UGT2B11 EM Mean	1	Corneocyte pH [upper mid] : Female	6.8	UGT1A4 UM Mean CV (%)	0	Lobe Distribution Percentage (%) Ventillation Rate LL	100	Subcell pH : Skin	5
	Abundance : SLC2A2 (GLUT2) UT Freq	0	Abundance : 3A4 CV (%) : Male	41	UGT2B11 EM Mean CV (%)	50	Corneocyte pH [upper mid] CV (%) : Female	0	UGT1A4 IM Mean	0	Lobe Distribution Percentage (%) Blood Flow Rate LL	2.5	Subcell pH : Spleen	5
	Abundance : SLC9A1 (ENT1) PT Freq	0	Abundance : 3A4 Mean : Female	137	UGT2B11 PM Mean	0	Corneocyte thickness [upper mid] (µm) : Male	0.81	UGT1A4 IM Mean CV (%)	0	Lobe Distribution Percentage (%) Blood Flow Rate LL	11.8	Subcell pH : RBC	5
	Abundance : SLC9A1 (ENT1) IT Freq	0	Abundance : 3A4 CV (%) : Female	41	UGT2B11 PM Mean CV (%)	0	Corneocyte thickness [upper mid] CV (%) : Male	36	UGT1A4 Absolute Abundance	1.9	Lobe Distribution Percentage (%) Blood Flow Rate LL	8.6	Subcell pH : Pancreas	5
	Abundance : SLC9A1 (ENT1) UT Freq	0	Abundance : CYP2C9 Allelele 1 Genotype 1 Mean	83.4	UGT2B11 UM Mean	0	Corneocyte thickness [upper mid] (µm) : Female	0.81	UGT1A5 EM Mean	1	Lobe Distribution Percentage (%) Blood Flow Rate LL	34.9	Local pH : Plasma	7.4
	Abundance : SLC9A2 (ENT2) PT Freq	0	Abundance : CYP2C9 Allelele 1 Genotype 1 CV (%)	60.5	UGT2B11 UM Mean CV (%)	0	Corneocyte thickness [upper mid] CV (%) : Female	36	UGT1A5 EM Mean CV (%)	60	Lobe Distribution Percentage (%) Blood Flow Rate LL	8.6	Local pH : EW	7.4
	Abundance : SLC9A2 (ENT2) IT Freq	0	Turnover rate : CYP2C9 Allelele 1 Genotype 1 Mean	0.0067	UGT2B11 IM Mean	0	Corneocyte width [upper mid] (µm) : Male	27.7	UGT1A5 PM Mean	0	Lobe Distribution Percentage (%) Blood Flow Rate LL	5	Local pH : Generic IW	7
	Abundance : SLC9A2 (ENT2) UT Freq	0	Turnover rate : CYP2C9 Allelele 1 Genotype 1 CV (%)	56	UGT2B11 IM Mean CV (%)	0	Corneocyte width [upper mid] CV (%) : Male	9.2	UGT1A5 PM Mean CV (%)	0	Lobe Distribution Percentage (%) Blood Flow Rate LL	2.5	Local pH : Gut ISF	7.23
	Abundance : SLC10A1 (NTCP) PT Freq	0	Abundance : CYP2C9 Allelele 1 Genotype 2 Mean	75.8	UGT2B11 Absolute Abundance	0	Corneocyte width [upper mid] (µm) : Female	27.7	UGT1A5 UM Mean	0	Lobe Distribution Percentage (%) Alveoli Volume LL	26.3	Local pH : CSF	7.31
	Abundance : SLC10A1 (NTCP) IT Freq	0	Abundance : CYP2C9 Allelele 1 Genotype 2 CV (%)	63.8	UGT2B11 Mean Turnover Rate	1e-06	Corneocyte width [upper mid] CV (%) : Female	9.2	UGT1A5 UM Mean CV (%)	0	Lobe Distribution Percentage (%) Alveoli Volume LL	10.5	Local pH : Pulmonary Fluid	6.6
	Abundance : SLC10A1 (NTCP) UT Freq	0	Turnover rate : CYP2C9 Allelele 1 Genotype 2 Mean	0.0067	UGT2B11 Mean Turnover Rate CV (%)	30	Corneocyte length [upper mid] (µm) : Male	34.2	UGT1A5 IM Mean	0	Lobe Distribution Percentage (%) Alveoli Volume LL	15.8	Subcell fraction : Adipose(%)	0
	Abundance : SLC10A2 (ASBT/IBAT) PT Freq	0	Turnover rate : CYP2C9 Allelele 1 Genotype 2 CV (%)	56	UGT2B15 EM Mean	1	Corneocyte length [upper mid] CV (%) : Male	4.1	UGT1A5 IM Mean CV (%)	0	Lobe Distribution Percentage (%) Alveoli Volume LL	26.3	Subcell fraction : Bone(%)	0
	Abundance : SLC10A2 (ASBT/IBAT) IT Freq	0	Abundance : CYP2C9 Allelele 1 Genotype 3 Mean	75.8	UGT2B15 EM Mean CV (%)	50	Corneocyte length [upper mid] (µm) : Female	34.2	UGT1A5 Absolute Abundance	0.3	Lobe Distribution Percentage (%) Alveoli Volume LL	21	Subcell fraction : Brain(%)	0
	Abundance : SLC10A2 (ASBT/IBAT) UT Freq	0	Abundance : CYP2C9 Allelele 1 Genotype 3 CV (%)	63.8	UGT2B15 PM Mean	0.07	Corneocyte length [upper mid] CV (%) : Female	4.1	UGT1A6 EM Mean	1	Lobe Distribution Percentage (%) Alveoli Volume LL	50	Subcell fraction : Gut(%)	0
	Abundance : SLC15A1 (PEPT1) PT Freq	0	Turnover rate : CYP2C9 Allelele 1 Genotype 3 Mean	0.0067	UGT2B15 PM Mean CV (%)	50	Hydration level (% water volume) [upper mid] : Male	46.1	UGT1A6 EM Mean CV (%)	60	Lobe Distribution Percentage (%) Alveoli Volume LL	50	Subcell fraction : Heart(%)	0
	Abundance : SLC15A1 (PEPT1) IT Freq	0	Turnover rate : CYP2C9 Allelele 1 Genotype 3 CV (%)	56	UGT2B15 UM Mean	0	Hydration level (% water volume) [upper mid] CV (%) : Male	11	UGT1A6 PM Mean	0	Lobe Distribution Percentage (%) Absorption Area LL	26.3	Subcell fraction : Kidney(%)	1
	Abundance : SLC15A1 (PEPT1) UT Freq	0	Abundance : CYP2C9 Allelele 1 Genotype 4 Mean	75.8	UGT2B15 UM Mean CV (%)	0	Hydration level (% water volume) [upper mid] : Female	46.1	UGT1A6 PM Mean CV (%)	0	Lobe Distribution Percentage (%) Absorption Area LL	10.5	Subcell fraction : Liver(%)	1
	Abundance : SLC16A1 (MCT1) PT Freq	0	Abundance : CYP2C9 Allelele 1 Genotype 4 CV (%)	63.8	UGT2B15 IM Mean	0.47	Hydration level (% water volume) [upper mid] CV (%) : Female	11	UGT1A6 UM Mean	0	Lobe Distribution Percentage (%) Absorption Area LL	15.8	Subcell fraction : Lung(%)	1
	Abundance : SLC16A1 (MCT1) IT Freq	0	Turnover rate : CYP2C9 Allelele 1 Genotype 4 Mean	0.0067	UGT2B15 IM Mean CV (%)	50	SC lipid viscosity [upper mid] (centipose) : Male	75	UGT1A6 UM Mean CV (%)	0	Lobe Distribution Percentage (%) Absorption Area LL	26.3	Subcell fraction : Muscle(%)	0
	Abundance : SLC16A1 (MCT1) UT Freq	0	Turnover rate : CYP2C9 Allelele 1 Genotype 4 CV (%)	56	UGT2B15 Absolute Abundance	0.2	SC lipid viscosity [upper mid] CV (%) : Male	0	UGT1A6 IM Mean	0	Lobe Distribution Percentage (%) Absorption Area LL	21	Subcell fraction : Skin(%)	0
	Abundance : SLCO1B1 (OATP1B1) PT Freq	0.02	Abundance : CYP2C9 Allelele 1 Genotype 5 Mean	75.8	UGT2B15 Mean Turnover Rate	1e-06	SC lipid viscosity [upper mid] (centipose) : Female	75	UGT1A6 IM Mean CV (%)	0	Lobe Distribution Percentage (%) Absorption Area LL	50	Subcell fraction : Spleen(%)	0
	Abundance : SLCO1B1 (OATP1B1) IT Freq	0.27	Abundance : CYP2C9 Allelele 1 Genotype 5 CV (%)	63.8	UGT2B15 Mean Turnover Rate CV (%)	30	SC lipid viscosity [upper mid] CV (%) : Female	0	UGT1A6 Absolute Abundance	1.3	Lobe Distribution Percentage (%) Absorption Area LL	50	Subcell fraction : Pancreas(%)	0
	Abundance : SLCO1B1 (OATP1B1) UT Freq	0.07	Turnover rate : CYP2C9 Allelele 1 Genotype 5 Mean	0.0067	UGT2B17 EM Mean	1	Corneocyte pH [lower mid] : Male	6.8	UGT1A7 EM Mean	1	Lobe Distribution Percentage (%) Pulmonary Capilliary Blood Volume LL	16.66	Liver model	PerMCL
	Abundance : SLCO1B3 (OATP1B3) PT Freq	0	Turnover rate : CYP2C9 Allelele 1 Genotype 5 CV (%)	56	UGT2B17 EM Mean CV (%)	50	Corneocyte pH [lower mid] CV (%) : Male	0	UGT1A7 EM Mean CV (%)	60	Lobe Distribution Percentage (%) Pulmonary Capilliary Blood Volume LL	16.67	Liver : 1 VS (%)	5
	Abundance : SLCO1B3 (OATP1B3) IT Freq	0	Abundance : CYP2C9 Allelele 1 Genotype 6 Mean	23	UGT2B17 PM Mean	0.08	Corneocyte pH [lower mid] : Female	6.8	UGT1A7 PM Mean	0	Lobe Distribution Percentage (%) Pulmonary Capilliary Blood Volume LL	16.67	Liver : 1 EW (%)	16.5
	Abundance : SLCO1B3 (OATP1B3) UT Freq	0	Abundance : CYP2C9 Allelele 1 Genotype 6 CV (%)	60	UGT2B17 PM Mean CV (%)	50	Corneocyte pH [lower mid] CV (%) : Female	0	UGT1A7 PM Mean CV (%)	0	Lobe Distribution Percentage (%) Pulmonary Capilliary Blood Volume LL	16.67	Liver : 1 NL (%)	3.48
	Abundance : SLCO2B1 (OATP2B1) PT Freq	0	Turnover rate : CYP2C9 Allelele 1 Genotype 6 Mean	0.0067	UGT2B17 UM Mean	0	Corneocyte thickness [lower mid] (µm) : Male	0.91	UGT1A7 UM Mean	0	Lobe Distribution Percentage (%) Pulmonary Capilliary Blood Volume LL	16.67	Liver : 1 NP (%)	2.52
	Abundance : SLCO2B1 (OATP2B1) IT Freq	0	Turnover rate : CYP2C9 Allelele 1 Genotype 6 CV (%)	56	UGT2B17 UM Mean CV (%)	0	Corneocyte thickness [lower mid] CV (%) : Male	36	UGT1A7 UM Mean CV (%)	0	Lobe Distribution Percentage (%) Pulmonary Capilliary Blood Volume LL	8.33	Liver : 1 IW (%)	58.6
	Abundance : SLCO2B1 (OATP2B1) UT Freq	0	Abundance : UGT1A1 EM Mean	1	UGT2B17 IM Mean	0.16	Corneocyte thickness [lower mid] (µm) : Female	0.91	UGT1A7 IM Mean	0	Lobe Distribution Percentage (%) Pulmonary Capilliary Blood Volume LL	8.33	Liver : 1 AP (mg/g)	5.09
	Abundance : SLCO4C1 (OATP4C1) PT Freq	0	Abundance : UGT1A1 EM CV (%)	24	UGT2B17 IM Mean CV (%)	50	Corneocyte thickness [lower mid] CV (%) : Female	36	UGT1A7 IM Mean CV (%)	0	Lobe Distribution Percentage (%) Pulmonary Mass Volume LL	16.66	Liver : 1 KpALB	0.086
	Abundance : SLCO4C1 (OATP4C1) IT Freq	0	Abundance : UGT1A1 PM Mean	0.42	UGT2B17 Absolute Abundance	0	Corneocyte width [lower mid] (µm) : Male	27.7	UGT1A7 Absolute Abundance	7.1	Lobe Distribution Percentage (%) Pulmonary Mass Volume LL	16.67	Liver : 1 KpLPP	0.161
	Abundance : SLCO4C1 (OATP4C1) UT Freq	0	Abundance : UGT1A1 PM CV (%)	50.8	UGT2B17 Mean Turnover Rate	1e-06	Corneocyte width [lower mid] CV (%) : Male	9.2	UGT1A8 EM Mean	1	Lobe Distribution Percentage (%) Pulmonary Mass Volume LL	16.67	Liver : 1 Local pH (IW)	7
	Abundance : SLC22A1 (OCT1) PT Freq	0	Abundance : UGT1A1 UM Mean	1.46	UGT2B17 Mean Turnover Rate CV (%)	30	Corneocyte width [lower mid] (µm) : Female	27.7	UGT1A8 EM Mean CV (%)	60	Lobe Distribution Percentage (%) Pulmonary Mass Volume LL	16.67	Liver : 1 Local pH (EW)	7.4
	Abundance : SLC22A1 (OCT1) IT Freq	0	Abundance : UGT1A1 UM CV (%)	30	UGT2B28 EM Mean	1	Corneocyte width [lower mid] CV (%) : Female	9.2	UGT1A8 PM Mean	0	Lobe Distribution Percentage (%) Pulmonary Mass Volume LL	16.67	Liver : 2 VS (%)	5
	Abundance : SLC22A1 (OCT1) UT Freq	0	Abundance : UGT1A1 IM Mean	0.72	UGT2B28 EM Mean CV (%)	50	Corneocyte length [lower mid] (µm) : Male	34.2	UGT1A8 PM Mean CV (%)	0	Lobe Distribution Percentage (%) Pulmonary Mass Volume LL	8.33	Liver : 2 EW (%)	16.5
	Abundance : SLC22A2 (OCT2) PT Freq	0	Abundance : UGT1A1 IM CV (%)	39.9	UGT2B28 PM Mean	0	Corneocyte length [lower mid] CV (%) : Male	4.1	UGT1A8 UM Mean	0	Lobe Distribution Percentage (%) Pulmonary Mass Volume LL	8.33	Liver : 2 NL (%)	3.48
	Abundance : SLC22A2 (OCT2) IT Freq	0	Absolute Abundance : UGT1A1	48	UGT2B28 PM Mean CV (%)	0	Corneocyte length [lower mid] (µm) : Female	34.2	UGT1A8 UM Mean CV (%)	0	Lobe Distribution Percentage (%) Epithelial Lining Fluid Volume LL	16.66	Liver : 2 NP (%)	2.52
	Abundance : SLC22A2 (OCT2) UT Freq	0	Turnover rate : UGT1A1 Mean	0.0578	UGT2B28 UM Mean	0	Corneocyte length [lower mid] CV (%) : Female	4.1	UGT1A8 IM Mean	0	Lobe Distribution Percentage (%) Epithelial Lining Fluid Volume LL	16.67	Liver : 2 IW (%)	58.6
	Abundance : SLC22A3 (OCT3) PT Freq	0	Turnover rate : UGT1A1 CV (%)	30	UGT2B28 UM Mean CV (%)	0	Hydration level (% water volume) [lower mid] : Male	56.75	UGT1A8 IM Mean CV (%)	0	Lobe Distribution Percentage (%) Epithelial Lining Fluid Volume LL	16.67	Liver : 2 AP (mg/g)	5.09
	Abundance : SLC22A3 (OCT3) IT Freq	0	Abundance : UGT1A3 EM Mean	1	UGT2B28 IM Mean	0	Hydration level (% water volume) [lower mid] CV (%) : Male	7	UGT1A8 Absolute Abundance	5.6	Lobe Distribution Percentage (%) Epithelial Lining Fluid Volume LL	16.67	Liver : 2 KpALB	0.086
	Abundance : SLC22A3 (OCT3) UT Freq	0	Abundance : UGT1A3 EM CV (%)	36	UGT2B28 IM Mean CV (%)	0	Hydration level (% water volume) [lower mid] : Female	56.75	UGT1A9 EM Mean	1	Lobe Distribution Percentage (%) Epithelial Lining Fluid Volume LL	16.67	Liver : 2 KpLPP	0.161
	Abundance : SLC22A4 (OCTN1) PT Freq	0	Abundance : UGT1A3 PM Mean	0	UGT2B28 Absolute Abundance	0	Hydration level (% water volume) [lower mid] CV (%) : Female	7	UGT1A9 EM Mean CV (%)	60	Lobe Distribution Percentage (%) Epithelial Lining Fluid Volume LL	8.33	Liver : 2 Local pH (IW)	7
	Abundance : SLC22A4 (OCTN1) IT Freq	0	Abundance : UGT1A3 PM CV (%)	0	UGT2B28 Mean Turnover Rate	1e-06	SC lipid viscosity [lower mid] (centipose) : Male	75	UGT1A9 PM Mean	0.07	Lobe Distribution Percentage (%) Epithelial Lining Fluid Volume LL	8.33	Liver : 2 Local pH (EW)	7.4
	Abundance : SLC22A4 (OCTN1) UT Freq	0	Abundance : UGT1A3 UM Mean	0	UGT2B28 Mean Turnover Rate CV (%)	30	SC lipid viscosity [lower mid] CV (%) : Male	0	UGT1A9 PM Mean CV (%)	60	Lobe Distribution Percentage (%) Ventillation Rate LT	25.9	Liver : 3 VS (%)	5
	Abundance : SLC22A6 (OAT1) PT Freq	0	Abundance : UGT1A3 UM CV (%)	0	Use User UGT Option	Yes	SC lipid viscosity [lower mid] (centipose) : Female	75	UGT1A9 UM Mean	0	Lobe Distribution Percentage (%) Ventillation Rate LT	12.4	Liver : 3 EW (%)	16.5
	Abundance : SLC22A6 (OAT1) IT Freq	0	Abundance : UGT1A3 IM Mean	0	UGT User	1	SC lipid viscosity [lower mid] CV (%) : Female	0	UGT1A9 UM Mean CV (%)	0	Lobe Distribution Percentage (%) Ventillation Rate LT	14.8	Liver : 3 NL (%)	3.48
	Abundance : SLC22A6 (OAT1) UT Freq	0	Abundance : UGT1A3 IM CV (%)	0	User UGT1 EM Mean	1	Corneocyte pH [bottom] : Male	6.8	UGT1A9 IM Mean	0.19	Lobe Distribution Percentage (%) Ventillation Rate LT	32.1	Liver : 3 NP (%)	2.52
	Abundance : SLC22A7 (OAT2) PT Freq	0	Absolute Abundance : UGT1A3	23	User UGT1 EM Mean CV (%)	50	Corneocyte pH [bottom] CV (%) : Male	0	UGT1A9 IM Mean CV (%)	60	Lobe Distribution Percentage (%) Ventillation Rate LT	14.8	Liver : 3 IW (%)	58.6
	Abundance : SLC22A7 (OAT2) IT Freq	0	Turnover rate : UGT1A3 Mean	1e-06	User UGT1 PM Mean	0	Corneocyte pH [bottom] : Female	6.8	UGT1A9 Absolute Abundance	5.9	Lobe Distribution Percentage (%) Ventillation Rate LT	100	Liver : 3 AP (mg/g)	5.09
	Abundance : SLC22A7 (OAT2) UT Freq	0	Turnover rate : UGT1A3 CV (%)	30	User UGT1 PM Mean CV (%)	0	Corneocyte pH [bottom] CV (%) : Female	0	UGT1A10 EM Mean	1	Lobe Distribution Percentage (%) Ventillation Rate LT	100	Liver : 3 KpALB	0.086
	Abundance : SLC22A8 (OAT3) PT Freq	0	Abundance : UGT1A4 EM Mean	1	User UGT1 UM Mean	0	Corneocyte thickness [bottom] (µm) : Male	1.03	UGT1A10 EM Mean CV (%)	60	Lobe Distribution Percentage (%) Blood Flow Rate LT	2.5	Liver : 3 KpLPP	0.161
	Abundance : SLC22A8 (OAT3) IT Freq	0	Abundance : UGT1A4 EM CV (%)	26	User UGT1 UM Mean CV (%)	0	Corneocyte thickness [bottom] CV (%) : Male	36	UGT1A10 PM Mean	0	Lobe Distribution Percentage (%) Blood Flow Rate LT	11.8	Liver : 3 Local pH (IW)	7
	Abundance : SLC22A8 (OAT3) UT Freq	0	Abundance : UGT1A4 PM Mean	0	User UGT1 IM Mean	0	Corneocyte thickness [bottom] (µm) : Female	1.03	UGT1A10 PM Mean CV (%)	0	Lobe Distribution Percentage (%) Blood Flow Rate LT	8.6	Liver : 3 Local pH (EW)	7.4
	Abundance : SLC22A9 (OAT7) PT Freq	0	Abundance : UGT1A4 PM CV (%)	0	User UGT1 IM Mean CV (%)	0	Corneocyte thickness [bottom] CV (%) : Female	36	UGT1A10 UM Mean	0	Lobe Distribution Percentage (%) Blood Flow Rate LT	34.9	Liver : 4 VS (%)	5
	Abundance : SLC22A9 (OAT7) IT Freq	0	Abundance : UGT1A4 UM Mean	0	User UGT1 Absolute Abundance	0	Corneocyte width [bottom] (µm) : Male	27.7	UGT1A10 UM Mean CV (%)	0	Lobe Distribution Percentage (%) Blood Flow Rate LT	8.6	Liver : 4 EW (%)	16.5
	Abundance : SLC22A9 (OAT7) UT Freq	0	Abundance : UGT1A4 UM CV (%)	0	User UGT1 Mean Turnover Rate	1e-06	Corneocyte width [bottom] CV (%) : Male	9.2	UGT1A10 IM Mean	0	Lobe Distribution Percentage (%) Blood Flow Rate LT	5	Liver : 4 NL (%)	3.48
	Abundance : SLC47A1 (MATE1) PT Freq	0	Abundance : UGT1A4 IM Mean	0	User UGT1 Mean Turnover Rate CV (%)	30	Corneocyte width [bottom] (µm) : Female	27.7	UGT1A10 IM Mean CV (%)	0	Lobe Distribution Percentage (%) Blood Flow Rate LT	2.5	Liver : 4 NP (%)	2.52
	Abundance : SLC47A1 (MATE1) IT Freq	0	Abundance : UGT1A4 IM CV (%)	0	Use User Cytosolic Enzyme Option	Yes	Corneocyte width [bottom] CV (%) : Female	9.2	UGT1A10 Absolute Abundance	4.3	Lobe Distribution Percentage (%) Alveoli Volume LT	26.3	Liver : 4 IW (%)	58.6
	Abundance : SLC47A1 (MATE1) UT Freq	0	Absolute Abundance : UGT1A4	52	User Cyt	1	Corneocyte length [bottom] (µm) : Male	34.2	UGT2B4 EM Mean	1	Lobe Distribution Percentage (%) Alveoli Volume LT	10.5	Liver : 4 AP (mg/g)	5.09
	Abundance : SLC47As (MATEs) PT Freq	0	Turnover rate : UGT1A4 Mean	1e-06	User Cyt1 EM Mean	1	Corneocyte length [bottom] CV (%) : Male	4.1	UGT2B4 EM Mean CV (%)	60	Lobe Distribution Percentage (%) Alveoli Volume LT	15.8	Liver : 4 KpALB	0.086
	Abundance : SLC47As (MATEs) IT Freq	0	Turnover rate : UGT1A4 CV (%)	30	User Cyt1 EM Mean CV (%)	30	Corneocyte length [bottom] (µm) : Female	34.2	UGT2B4 PM Mean	0	Lobe Distribution Percentage (%) Alveoli Volume LT	26.3	Liver : 4 KpLPP	0.161
	Abundance : SLC47As (MATEs) UT Freq	0	Abundance : UGT1A5 EM Mean	1	User Cyt1 PM Mean	0	Corneocyte length [bottom] CV (%) : Female	4.1	UGT2B4 PM Mean CV (%)	0	Lobe Distribution Percentage (%) Alveoli Volume LT	21	Liver : 4 Local pH (IW)	7
	Abundance : SLC51A/B (OST-α/β) PT Freq	0	Abundance : UGT1A5 EM CV (%)	30	User Cyt1 PM Mean CV (%)	0	Hydration level (% water volume) [bottom] : Male	67.4	UGT2B4 UM Mean	0	Lobe Distribution Percentage (%) Alveoli Volume LT	50	Liver : 4 Local pH (EW)	7.4
	Abundance : SLC51A/B (OST-α/β) IT Freq	0	Abundance : UGT1A5 PM Mean	0	User Cyt1 UM Mean	0	Hydration level (% water volume) [bottom] CV (%) : Male	4	UGT2B4 UM Mean CV (%)	0	Lobe Distribution Percentage (%) Alveoli Volume LT	50	Liver : 5 VS (%)	5
	Abundance : SLC51A/B (OST-α/β) UT Freq	0	Abundance : UGT1A5 PM CV (%)	0	User Cyt1 UM Mean CV (%)	0	Hydration level (% water volume) [bottom] : Female	67.4	UGT2B4 IM Mean	0	Lobe Distribution Percentage (%) Absorption Area LT	26.3	Liver : 5 EW (%)	16.5
	Abundance : Apical Influx (Intestine) PT Freq	0	Abundance : UGT1A5 UM Mean	0	User Cyt1 IM Mean	0	Hydration level (% water volume) [bottom] CV (%) : Female	4	UGT2B4 IM Mean CV (%)	0	Lobe Distribution Percentage (%) Absorption Area LT	10.5	Liver : 5 NL (%)	3.48
	Abundance : Apical Influx (Intestine) IT Freq	0	Abundance : UGT1A5 UM CV (%)	0	User Cyt1 IM Mean CV (%)	0	SC lipid viscosity [bottom] (centipose) : Male	75	UGT2B4 Absolute Abundance	0	Lobe Distribution Percentage (%) Absorption Area LT	15.8	Liver : 5 NP (%)	2.52
	Abundance : Apical Influx (Intestine) UT Freq	0	Abundance : UGT1A5 IM Mean	0	Use User Cytosolic Enzyme Option	Yes	SC lipid viscosity [bottom] CV (%) : Male	0	UGT2B7 EM Mean	1	Lobe Distribution Percentage (%) Absorption Area LT	26.3	Liver : 5 IW (%)	58.6
	Abundance : Apical Efflux (Intestine) PT Freq	0	Abundance : UGT1A5 IM CV (%)	0	User Cyt	2	SC lipid viscosity [bottom] (centipose) : Female	75	UGT2B7 EM Mean CV (%)	60	Lobe Distribution Percentage (%) Absorption Area LT	21	Liver : 5 AP (mg/g)	5.09
	Abundance : Apical Efflux (Intestine) IT Freq	0	Absolute Abundance : UGT1A5	0	User Cyt2 EM Mean	1	SC lipid viscosity [bottom] CV (%) : Female	0	UGT2B7 PM Mean	0	Lobe Distribution Percentage (%) Absorption Area LT	50	Liver : 5 KpALB	0.086
	Abundance : Apical Efflux (Intestine) UT Freq	0	Turnover rate : UGT1A5 Mean	1e-06	User Cyt2 EM Mean CV (%)	30	Viable Epidermis thickness (µm) : Male	50.05	UGT2B7 PM Mean CV (%)	0	Lobe Distribution Percentage (%) Absorption Area LT	50	Liver : 5 KpLPP	0.161
	Abundance : Sinusoidal Uptake (Liver) PT Freq	0	Turnover rate : UGT1A5 CV (%)	30	User Cyt2 PM Mean	0	Viable Epidermis thickness CV (%) : Male	7	UGT2B7 UM Mean	0	Lobe Distribution Percentage (%) Pulmonary Capilliary Blood Volume LT	16.66	Liver : 5 Local pH (IW)	7
	Abundance : Sinusoidal Uptake (Liver) IT Freq	0	Abundance : UGT1A6 EM Mean	1	User Cyt2 PM Mean CV (%)	0	Viable Epidermis thickness (µm) : Female	50.05	UGT2B7 UM Mean CV (%)	0	Lobe Distribution Percentage (%) Pulmonary Capilliary Blood Volume LT	16.67	Liver : 5 Local pH (EW)	7.4
	Abundance : Sinusoidal Uptake (Liver) UT Freq	0	Abundance : UGT1A6 EM CV (%)	30	User Cyt2 UM Mean	0	Viable Epidermis thickness CV (%) : Female	7	UGT2B7 IM Mean	0	Lobe Distribution Percentage (%) Pulmonary Capilliary Blood Volume LT	16.67	Liver : 6 VS (%)	5
	Abundance : Sinusoidal Efflux (Liver) PT Freq	0	Abundance : UGT1A6 PM Mean	0	User Cyt2 UM Mean CV (%)	0	Dermis thickness (µm) : Male	1250	UGT2B7 IM Mean CV (%)	0	Lobe Distribution Percentage (%) Pulmonary Capilliary Blood Volume LT	16.67	Liver : 6 EW (%)	16.5
	Abundance : Sinusoidal Efflux (Liver) IT Freq	0	Abundance : UGT1A6 PM CV (%)	0	User Cyt2 IM Mean	0	Dermis thickness CV (%) : Male	45	UGT2B7 Absolute Abundance	4.5	Lobe Distribution Percentage (%) Pulmonary Capilliary Blood Volume LT	16.67	Liver : 6 NL (%)	3.48
	Abundance : Sinusoidal Efflux (Liver) UT Freq	0	Abundance : UGT1A6 UM Mean	0	User Cyt2 IM Mean CV (%)	0	Dermis thickness (µm) : Female	1250	UGT2B10 EM Mean	1	Lobe Distribution Percentage (%) Pulmonary Capilliary Blood Volume LT	8.33	Liver : 6 NP (%)	2.52
	Abundance : Canalicular Efflux (Liver) PT Freq	0	Abundance : UGT1A6 UM CV (%)	0	Use User Cytosolic Enzyme Option	Yes	Dermis thickness CV (%) : Female	45	UGT2B10 EM Mean CV (%)	60	Lobe Distribution Percentage (%) Pulmonary Capilliary Blood Volume LT	8.33	Liver : 6 IW (%)	58.6
	Abundance : Canalicular Efflux (Liver) IT Freq	0	Abundance : UGT1A6 IM Mean	0	User Cyt	3	Subcutis thickness (mm) : Male	1.9	UGT2B10 PM Mean	0	Lobe Distribution Percentage (%) Pulmonary Mass Volume LT	16.66	Liver : 6 AP (mg/g)	5.09
	Abundance : Canalicular Efflux (Liver) UT Freq	0	Abundance : UGT1A6 IM CV (%)	0	User Cyt3 EM Mean	1	Subcutis thickness CV (%) : Male	55.72	UGT2B10 PM Mean CV (%)	0	Lobe Distribution Percentage (%) Pulmonary Mass Volume LT	16.67	Liver : 6 KpALB	0.086
	Abundance : Apical Influx (Kidney) PT Freq	0	Absolute Abundance : UGT1A6	20	User Cyt3 EM Mean CV (%)	30	Subcutis thickness (mm) : Female	1.91	UGT2B10 UM Mean	0	Lobe Distribution Percentage (%) Pulmonary Mass Volume LT	16.67	Liver : 6 KpLPP	0.161
	Abundance : Apical Influx (Kidney) IT Freq	0	Turnover rate : UGT1A6 Mean	1e-06	User Cyt3 PM Mean	0	Subcutis thickness CV (%) : Female	55.72	UGT2B10 UM Mean CV (%)	0	Lobe Distribution Percentage (%) Pulmonary Mass Volume LT	16.67	Liver : 6 Local pH (IW)	7
	Abundance : Apical Influx (Kidney) UT Freq	0	Turnover rate : UGT1A6 CV (%)	30	User Cyt3 PM Mean CV (%)	0	Muscle thickness (mm) : Male	1.46	UGT2B10 IM Mean	0	Lobe Distribution Percentage (%) Pulmonary Mass Volume LT	16.67	Liver : 6 Local pH (EW)	7.4
	Abundance : Basolateral Efflux (Kidney) PT Freq	0	Abundance : UGT1A7 EM Mean	1	User Cyt3 UM Mean	0	Muscle thickness CV (%) : Male	2.74	UGT2B10 IM Mean CV (%)	0	Lobe Distribution Percentage (%) Pulmonary Mass Volume LT	8.33
	Abundance : Basolateral Efflux (Kidney) IT Freq	0	Abundance : UGT1A7 EM CV (%)	30	User Cyt3 UM Mean CV (%)	0	Muscle thickness (mm) : Female	1.37	UGT2B10 Absolute Abundance	0.1	Lobe Distribution Percentage (%) Pulmonary Mass Volume LT	8.33
	Abundance : Basolateral Efflux (Kidney) UT Freq	0	Abundance : UGT1A7 PM Mean	0	User Cyt3 IM Mean	0	Muscle thickness CV (%) : Female	4.38	UGT2B11 EM Mean	1	Lobe Distribution Percentage (%) Epithelial Lining Fluid Volume LT	16.66
	Abundance : Basolateral Influx (Intestine) PT Freq	0	Abundance : UGT1A7 PM CV (%)	0	User Cyt3 IM Mean CV (%)	0	Dermis regional blood flow scalar : Male	2.13	UGT2B11 EM Mean CV (%)	60	Lobe Distribution Percentage (%) Epithelial Lining Fluid Volume LT	16.67
	Abundance : Basolateral Influx (Intestine) IT Freq	0	Abundance : UGT1A7 UM Mean	0	Use User Cytosolic Enzyme Option	Yes	Dermis regional blood flow scalar CV (%) : Male	0	UGT2B11 PM Mean	0	Lobe Distribution Percentage (%) Epithelial Lining Fluid Volume LT	16.67
	Abundance : Basolateral Influx (Intestine) UT Freq	0	Abundance : UGT1A7 UM CV (%)	0	User Cyt	4	Dermis regional blood flow scalar : Female	2.13	UGT2B11 PM Mean CV (%)	0	Lobe Distribution Percentage (%) Epithelial Lining Fluid Volume LT	16.67
	Abundance : Basolateral Efflux (Intestine) PT Freq	0	Abundance : UGT1A7 IM Mean	0	User Cyt4 EM Mean	1	Dermis regional blood flow scalar CV (%) : Female	0	UGT2B11 UM Mean	0	Lobe Distribution Percentage (%) Epithelial Lining Fluid Volume LT	16.67
	Abundance : Basolateral Efflux (Intestine) IT Freq	0	Abundance : UGT1A7 IM CV (%)	0	User Cyt4 EM Mean CV (%)	30	Subcutis regional blood flow scalar : Male	1	UGT2B11 UM Mean CV (%)	0	Lobe Distribution Percentage (%) Epithelial Lining Fluid Volume LT	8.33
	Abundance : Basolateral Efflux (Intestine) UT Freq	0	Absolute Abundance : UGT1A7	0	User Cyt4 PM Mean	0	Subcutis regional blood flow scalar CV (%) : Male	0	UGT2B11 IM Mean	0	Lobe Distribution Percentage (%) Epithelial Lining Fluid Volume LT	8.33
			Turnover rate : UGT1A7 Mean	1e-06	User Cyt4 PM Mean CV (%)	0	Subcutis regional blood flow scalar : Female	1	UGT2B11 IM Mean CV (%)	0	Lobe Distribution Percentage (%) Ventillation Rate LA	25.9
			Turnover rate : UGT1A7 CV (%)	30	User Cyt4 UM Mean	0	Subcutis regional blood flow scalar CV (%) : Female	0	UGT2B11 Absolute Abundance	0	Lobe Distribution Percentage (%) Ventillation Rate LA	12.4
			Abundance : UGT1A8 EM Mean	1	User Cyt4 UM Mean CV (%)	0	Muscle regional blood flow scalar : Male	1	UGT2B15 EM Mean	1	Lobe Distribution Percentage (%) Ventillation Rate LA	14.8
			Abundance : UGT1A8 EM CV (%)	30	User Cyt4 IM Mean	0	Muscle regional blood flow scalar CV (%) : Male	0	UGT2B15 EM Mean CV (%)	60	Lobe Distribution Percentage (%) Ventillation Rate LA	32.1
			Abundance : UGT1A8 PM Mean	0	User Cyt4 IM Mean CV (%)	0	Muscle regional blood flow scalar : Female	1	UGT2B15 PM Mean	0.07	Lobe Distribution Percentage (%) Ventillation Rate LA	14.8
			Abundance : UGT1A8 PM CV (%)	0	CES1 EM Mean	1	Muscle regional blood flow scalar CV (%) : Female	0	UGT2B15 PM Mean CV (%)	60	Lobe Distribution Percentage (%) Ventillation Rate LA	100
			Abundance : UGT1A8 UM Mean	0	CES1 EM CV (%)	30			UGT2B15 UM Mean	0	Lobe Distribution Percentage (%) Ventillation Rate LA	100
			Abundance : UGT1A8 UM CV (%)	0	CES1 PM Mean	0.11	MPMLA - Forearm Inner (volar)		UGT2B15 UM Mean CV (%)	0	Lobe Distribution Percentage (%) Blood Flow Rate LA	2.5
			Abundance : UGT1A8 IM Mean	0	CES1 PM CV (%)	30	Skin surface pH : Male	4.9	UGT2B15 IM Mean	0.47	Lobe Distribution Percentage (%) Blood Flow Rate LA	11.8
			Abundance : UGT1A8 IM CV (%)	0	CES1 UM Mean	0	Skin surface pH CV (%) : Male	8.8	UGT2B15 IM Mean CV (%)	60	Lobe Distribution Percentage (%) Blood Flow Rate LA	8.6
			Absolute Abundance : UGT1A8	0	CES1 UM CV (%)	0	Skin surface pH : Female	4.93	UGT2B15 Absolute Abundance	0.1	Lobe Distribution Percentage (%) Blood Flow Rate LA	34.9
			Turnover rate : UGT1A8 Mean	1e-06	CES1 IM Mean	0	Skin surface pH CV (%) : Female	7.4	UGT2B17 EM Mean	1	Lobe Distribution Percentage (%) Blood Flow Rate LA	8.6
			Turnover rate : UGT1A8 CV (%)	30	CES1 IM CV (%)	0	Skin temperature (°C) : Male	32	UGT2B17 EM Mean CV (%)	60	Lobe Distribution Percentage (%) Blood Flow Rate LA	5
			Abundance : UGT1A9 EM Mean	1	CES2 EM Mean	1	Skin temperature CV (%) : Male	0	UGT2B17 PM Mean	0.08	Lobe Distribution Percentage (%) Blood Flow Rate LA	2.5
			Abundance : UGT1A9 EM CV (%)	30	CES2 EM CV (%)	30	Skin temperature (°C) : Female	32	UGT2B17 PM Mean CV (%)	60	Lobe Distribution Percentage (%) Alveoli Volume LA	26.3
			Abundance : UGT1A9 PM Mean	0.07	CES2 PM Mean	0	Skin temperature CV (%) : Female	0	UGT2B17 UM Mean	0	Lobe Distribution Percentage (%) Alveoli Volume LA	10.5
			Abundance : UGT1A9 PM CV (%)	30	CES2 PM CV (%)	0	Shape of corneocyte : Male	Cuboid (brick)	UGT2B17 UM Mean CV (%)	0	Lobe Distribution Percentage (%) Alveoli Volume LA	15.8
			Abundance : UGT1A9 UM Mean	0	CES2 UM Mean	0	Shape of corneocyte : Female	Cuboid (brick)	UGT2B17 IM Mean	0.16	Lobe Distribution Percentage (%) Alveoli Volume LA	26.3
			Abundance : UGT1A9 UM CV (%)	0	CES2 UM CV (%)	0	Number of SC layers : Male	22	UGT2B17 IM Mean CV (%)	60	Lobe Distribution Percentage (%) Alveoli Volume LA	21
			Abundance : UGT1A9 IM Mean	0.19	CES2 IM Mean	0	Number of SC layers CV (%) : Male	14	UGT2B17 Absolute Abundance	11	Lobe Distribution Percentage (%) Alveoli Volume LA	50
			Abundance : UGT1A9 IM CV (%)	30	CES2 IM CV (%)	0	Number of SC layers : Female	22	UGT2B28 EM Mean	1	Lobe Distribution Percentage (%) Alveoli Volume LA	50
			Absolute Abundance : UGT1A9	31	Use User ES Option	Yes	Number of SC layers CV (%) : Female	30.3	UGT2B28 EM Mean CV (%)	60	Lobe Distribution Percentage (%) Absorption Area LA	26.3
			Turnover rate : UGT1A9 Mean	1e-06	User ES EM Mean	1	Water density (gm/cm3) : Male	1	UGT2B28 PM Mean	0	Lobe Distribution Percentage (%) Absorption Area LA	10.5
			Turnover rate : UGT1A9 CV (%)	30	User ES EM CV (%)	30	Water density CV (%) : Male	0	UGT2B28 PM Mean CV (%)	0	Lobe Distribution Percentage (%) Absorption Area LA	15.8
			Abundance : UGT1A10 EM Mean	1	User ES PM Mean	0	Water density (gm/cm3) : Female	1	UGT2B28 UM Mean	0	Lobe Distribution Percentage (%) Absorption Area LA	26.3
			Abundance : UGT1A10 EM CV (%)	30	User ES PM CV (%)	0	Water density CV (%) : Female	0	UGT2B28 UM Mean CV (%)	0	Lobe Distribution Percentage (%) Absorption Area LA	21
			Abundance : UGT1A10 PM Mean	0	User ES UM Mean	0	SC lipids density (gm/cm3) : Male	0.9	UGT2B28 IM Mean	0	Lobe Distribution Percentage (%) Absorption Area LA	50
			Abundance : UGT1A10 PM CV (%)	0	User ES UM CV (%)	0	SC lipids density CV (%) : Male	0	UGT2B28 IM Mean CV (%)	0	Lobe Distribution Percentage (%) Absorption Area LA	50
			Abundance : UGT1A10 UM Mean	0	User ES IM Mean	0	SC lipids density (gm/cm3) : Female	0.9	UGT2B28 Absolute Abundance	0	Lobe Distribution Percentage (%) Pulmonary Capilliary Blood Volume LA	16.66
			Abundance : UGT1A10 UM CV (%)	0	User ES IM CV (%)	0	SC lipids density CV (%) : Female	0	Use User UGT Option	Yes	Lobe Distribution Percentage (%) Pulmonary Capilliary Blood Volume LA	16.67
			Abundance : UGT1A10 IM Mean	0	Cortex/Medulla Ratio	0.92	SC proteins density (gm/cm3) : Male	1.37	UGT User	1	Lobe Distribution Percentage (%) Pulmonary Capilliary Blood Volume LA	16.67
			Abundance : UGT1A10 IM CV (%)	0	Peritubular Capillary (% Kidney volume)	7	SC proteins density CV (%) : Male	0	User UGT1 EM Mean	1	Lobe Distribution Percentage (%) Pulmonary Capilliary Blood Volume LA	16.67
			Absolute Abundance : UGT1A10	0.02	Million Nephrons per Subject Baseline	0.22693	SC proteins density (gm/cm3) : Female	1.37	User UGT1 EM Mean CV (%)	60	Lobe Distribution Percentage (%) Pulmonary Capilliary Blood Volume LA	16.67
			Turnover rate : UGT1A10 Mean	1e-06	Kidney Weight Coefficient	0.003948	SC proteins density CV (%) : Female	0	User UGT1 PM Mean	0	Lobe Distribution Percentage (%) Pulmonary Capilliary Blood Volume LA	8.33
			Turnover rate : UGT1A10 CV (%)	30	Proximal Tubule Length (mm)	18	Intercellular lipid thickness of SC (µm) : Male	0.091	User UGT1 PM Mean CV (%)	0	Lobe Distribution Percentage (%) Pulmonary Capilliary Blood Volume LA	8.33
			Abundance : UGT2B4 EM Mean	1	Henle's Loop Length (mm)	7	Intercellular lipid thickness of SC CV (%) : Male	0	User UGT1 UM Mean	0	Lobe Distribution Percentage (%) Pulmonary Mass Volume LA	16.66
			Abundance : UGT2B4 EM CV (%)	28	Distal Tubule Length (mm)	5.5	Intercellular lipid thickness of SC (µm) : Female	0.091	User UGT1 UM Mean CV (%)	0	Lobe Distribution Percentage (%) Pulmonary Mass Volume LA	16.67
			Abundance : UGT2B4 PM Mean	0	Collecting Duct Length (mm)	22	Intercellular lipid thickness of SC CV (%) : Female	0	User UGT1 IM Mean	0	Lobe Distribution Percentage (%) Pulmonary Mass Volume LA	16.67
			Abundance : UGT2B4 PM CV (%)	0	Proximal Tubule Diameter (mm)	0.06	Tortuosity of lipid diffusion pathway of SC : Male	12.7	User UGT1 IM Mean CV (%)	0	Lobe Distribution Percentage (%) Pulmonary Mass Volume LA	16.67
			Abundance : UGT2B4 UM Mean	0	Henle's Loop Diameter (mm)	0.018	Tortuosity of lipid diffusion pathway of SC CV (%) : Male	18	User UGT1 Absolute Abundance	0	Lobe Distribution Percentage (%) Pulmonary Mass Volume LA	16.67
			Abundance : UGT2B4 UM CV (%)	0	Distal Tubule Diameter (mm)	0.05	Tortuosity of lipid diffusion pathway of SC : Female	12.7	Use User Cytosolic Enzyme Option	Yes	Lobe Distribution Percentage (%) Pulmonary Mass Volume LA	8.33
			Abundance : UGT2B4 IM Mean	0	Collecting Duct Diameter (mm)	0.2	Tortuosity of lipid diffusion pathway of SC CV (%) : Female	18	User Cyt	1	Lobe Distribution Percentage (%) Pulmonary Mass Volume LA	8.33
			Abundance : UGT2B4 IM CV (%)	0	Proximal Tubule pH	7.4	Hair follicle diameter (µm) : Male	77.7	User Cyt1 EM Mean	1	Lobe Distribution Percentage (%) Epithelial Lining Fluid Volume LA	16.66
			Absolute Abundance : UGT2B4	54	Henle's Loop pH	7.4	Hair follicle diameter CV (%) : Male	32	User Cyt1 EM Mean CV (%)	60	Lobe Distribution Percentage (%) Epithelial Lining Fluid Volume LA	16.67
			Turnover rate : UGT2B4 Mean	1e-06	Distal Tubule pH	7.4	Hair follicle diameter (µm) : Female	77.7	User Cyt1 PM Mean	0	Lobe Distribution Percentage (%) Epithelial Lining Fluid Volume LA	16.67
			Turnover rate : UGT2B4 CV (%)	30	Collecting Duct pH	7.4	Hair follicle diameter CV (%) : Female	32	User Cyt1 PM Mean CV (%)	0	Lobe Distribution Percentage (%) Epithelial Lining Fluid Volume LA	16.67
			Abundance : UGT2B7 EM Mean	1	GFR Male Input Type	Predicted	Hair follicle density (N/cm2) : Male	18	User Cyt1 UM Mean	0	Lobe Distribution Percentage (%) Epithelial Lining Fluid Volume LA	16.67
			Abundance : UGT2B7 EM CV (%)	30.4	Male - Proximal Tubule Urine Flow Rate - GFR (mL/min)	130	Hair follicle density CV (%) : Male	39	User Cyt1 UM Mean CV (%)	0	Lobe Distribution Percentage (%) Epithelial Lining Fluid Volume LA	8.33
			Abundance : UGT2B7 PM Mean	0	Male - Henle's Loop Urine Flow Rate (mL/min)	46.77	Hair follicle density (N/cm2) : Female	18	User Cyt1 IM Mean	0	Lobe Distribution Percentage (%) Epithelial Lining Fluid Volume LA	8.33
			Abundance : UGT2B7 PM CV (%)	0	Male - Distal Tubule Urine Flow Rate (mL/min)	25.97	Hair follicle density CV (%) : Female	39	User Cyt1 IM Mean CV (%)	0	Lobe Distribution Percentage (%) Ventillation Rate UA	25.9
			Abundance : UGT2B7 UM Mean	0	Male - Collecting Duct Urine Flow Rate (mL/min)	12.44	Hair shaft diameter (µm) : Male	18	Use User Cytosolic Enzyme Option	Yes	Lobe Distribution Percentage (%) Ventillation Rate UA	12.4
			Abundance : UGT2B7 UM CV (%)	0	Male - Urine Flow Rate into Bladder (mL/min)	1	Hair shaft diameter CV (%) : Male	34	User Cyt	2	Lobe Distribution Percentage (%) Ventillation Rate UA	14.8
			Abundance : UGT2B7 IM Mean	0	GFR Female Input Type	Predicted	Hair shaft diameter (µm) : Female	18	User Cyt2 EM Mean	1	Lobe Distribution Percentage (%) Ventillation Rate UA	32.1
			Abundance : UGT2B7 IM CV (%)	0	Female - Proximal Tubule Urine Flow Rate - GFR (mL/min)	120	Hair shaft diameter CV (%) : Female	34	User Cyt2 EM Mean CV (%)	60	Lobe Distribution Percentage (%) Ventillation Rate UA	14.8
			Absolute Abundance : UGT2B7	71	Female - Henle's Loop Urine Flow Rate (mL/min)	47	Sebum viscosity (centipose) : Male	40	User Cyt2 PM Mean	0	Lobe Distribution Percentage (%) Ventillation Rate UA	100
			Turnover rate : UGT2B7 Mean	1e-06	Female - Distal Tubule Urine Flow Rate (mL/min)	26	Sebum viscosity CV (%) : Male	0	User Cyt2 PM Mean CV (%)	0	Lobe Distribution Percentage (%) Ventillation Rate UA	100
			Turnover rate : UGT2B7 CV (%)	30	Female - Collecting Duct Urine Flow Rate (mL/min)	12	Sebum viscosity (centipose) : Female	40	User Cyt2 UM Mean	0	Lobe Distribution Percentage (%) Blood Flow Rate UA	2.5
			Abundance : UGT2B10 EM Mean	1	Female - Urine Flow Rate into Bladder (mL/min)	1	Sebum viscosity CV (%) : Female	0	User Cyt2 UM Mean CV (%)	0	Lobe Distribution Percentage (%) Blood Flow Rate UA	11.8
			Abundance : UGT2B10 EM CV (%)	30	Bypass 1 before Glomerulus (%)	10	Corneocyte pH [top] : Male	6.8	User Cyt2 IM Mean	0	Lobe Distribution Percentage (%) Blood Flow Rate UA	8.6
			Abundance : UGT2B10 PM Mean	0	Bypass 1 before Glomerulus CV (%)	30	Corneocyte pH [top] CV (%) : Male	0	User Cyt2 IM Mean CV (%)	0	Lobe Distribution Percentage (%) Blood Flow Rate UA	34.9
			Abundance : UGT2B10 PM CV (%)	0	Bypass 2 to Henle's Loop & Medu-CD (%)	20	Corneocyte pH [top] : Female	6.8	Use User Cytosolic Enzyme Option	Yes	Lobe Distribution Percentage (%) Blood Flow Rate UA	8.6
			Abundance : UGT2B10 UM Mean	0	Bypass 2 to Henle's Loop & Medu-CD CV (%)	30	Corneocyte pH [top] CV (%) : Female	0	User Cyt	3	Lobe Distribution Percentage (%) Blood Flow Rate UA	5
			Abundance : UGT2B10 UM CV (%)	0	PT-S1 ABCB1 (MDR1/P-gp) / 106 PTC (Relative Values)	1	Corneocyte thickness [top] (µm) : Male	0.59	User Cyt3 EM Mean	1	Lobe Distribution Percentage (%) Blood Flow Rate UA	2.5
			Abundance : UGT2B10 IM Mean	0	PT-S1 ABCC4 (MRP4) / 106 PTC (Relative Values)	1	Corneocyte thickness [top] CV (%) : Male	22	User Cyt3 EM Mean CV (%)	60	Lobe Distribution Percentage (%) Alveoli Volume UA	26.3
			Abundance : UGT2B10 IM CV (%)	0	PT-S1 SLC22A2 (OCT2) / 106 PTC (Relative Values)	1	Corneocyte thickness [top] (µm) : Female	0.59	User Cyt3 PM Mean	0	Lobe Distribution Percentage (%) Alveoli Volume UA	10.5
			Absolute Abundance : UGT2B10	6.5	PT-S1 SLC22A6 (OAT1) / 106 PTC (Relative Values)	1	Corneocyte thickness [top] CV (%) : Female	22	User Cyt3 PM Mean CV (%)	0	Lobe Distribution Percentage (%) Alveoli Volume UA	15.8
			Turnover rate : UGT2B10 Mean	1e-06	PT-S1 SLC22A8 (OAT3) / 106 PTC (Relative Values)	1	Corneocyte width [top] (µm) : Male	29.6	User Cyt3 UM Mean	0	Lobe Distribution Percentage (%) Alveoli Volume UA	26.3
			Turnover rate : UGT2B10 CV (%)	30	PT-S1 SLC47As (MATEs) / 106 PTC (Relative Values)	1	Corneocyte width [top] CV (%) : Male	5.9	User Cyt3 UM Mean CV (%)	0	Lobe Distribution Percentage (%) Alveoli Volume UA	21
			Abundance : UGT2B11 EM Mean	1	PT-S1 Apical Influx (Kidney) / 106 PTC (Relative Values)	1	Corneocyte width [top] (µm) : Female	29.6	User Cyt3 IM Mean	0	Lobe Distribution Percentage (%) Alveoli Volume UA	50
			Abundance : UGT2B11 EM CV (%)	30	PT-S1 Basolateral Efflux (Kidney) / 106 PTC (Relative Values)	1	Corneocyte width [top] CV (%) : Female	5.9	User Cyt3 IM Mean CV (%)	0	Lobe Distribution Percentage (%) Alveoli Volume UA	50
			Abundance : UGT2B11 PM Mean	0	PT-S2 ABCB1 (MDR1/P-gp) / 106 PTC (Relative Values)	1	Corneocyte length [top] (µm) : Male	36.4	Use User Cytosolic Enzyme Option	Yes	Lobe Distribution Percentage (%) Absorption Area UA	26.3
			Abundance : UGT2B11 PM CV (%)	0	PT-S2 ABCC4 (MRP4) / 106 PTC (Relative Values)	1	Corneocyte length [top] CV (%) : Male	5.7	User Cyt	4	Lobe Distribution Percentage (%) Absorption Area UA	10.5
			Abundance : UGT2B11 UM Mean	0	PT-S2 SLC22A2 (OCT2) / 106 PTC (Relative Values)	1	Corneocyte length [top] (µm) : Female	36.4	User Cyt4 EM Mean	1	Lobe Distribution Percentage (%) Absorption Area UA	15.8
			Abundance : UGT2B11 UM CV (%)	0	PT-S2 SLC22A6 (OAT1) / 106 PTC (Relative Values)	1	Corneocyte length [top] CV (%) : Female	5.7	User Cyt4 EM Mean CV (%)	60	Lobe Distribution Percentage (%) Absorption Area UA	26.3
			Abundance : UGT2B11 IM Mean	0	PT-S2 SLC22A8 (OAT3) / 106 PTC (Relative Values)	1	Hydration level (% water volume) [top] : Male	33.9	User Cyt4 PM Mean	0	Lobe Distribution Percentage (%) Absorption Area UA	21
			Abundance : UGT2B11 IM CV (%)	0	PT-S2 SLC47As (MATEs) / 106 PTC (Relative Values)	1	Hydration level (% water volume) [top] CV (%) : Male	9	User Cyt4 PM Mean CV (%)	0	Lobe Distribution Percentage (%) Absorption Area UA	50
			Absolute Abundance : UGT2B11	0	PT-S2 Apical Influx (Kidney) / 106 PTC (Relative Values)	1	Hydration level (% water volume) [top] : Female	33.9	User Cyt4 UM Mean	0	Lobe Distribution Percentage (%) Absorption Area UA	50
			Turnover rate : UGT2B11 Mean	1e-06	PT-S2 Basolateral Efflux (Kidney) / 106 PTC (Relative Values)	1	Hydration level (% water volume) [top] CV (%) : Female	9	User Cyt4 UM Mean CV (%)	0	Lobe Distribution Percentage (%) Pulmonary Capilliary Blood Volume UA	16.66
			Turnover rate : UGT2B11 CV (%)	30	PT-S3 ABCB1 (MDR1/P-gp) / 106 PTC (Relative Values)	1	SC lipid viscosity [top] (centipose) : Male	75	User Cyt4 IM Mean	0	Lobe Distribution Percentage (%) Pulmonary Capilliary Blood Volume UA	16.67
			Abundance : UGT2B15 EM Mean	1	PT-S3 ABCC4 (MRP4) / 106 PTC (Relative Values)	1	SC lipid viscosity [top] CV (%) : Male	0	User Cyt4 IM Mean CV (%)	0	Lobe Distribution Percentage (%) Pulmonary Capilliary Blood Volume UA	16.67
			Abundance : UGT2B15 EM CV (%)	34	PT-S3 SLC22A2 (OCT2) / 106 PTC (Relative Values)	1	SC lipid viscosity [top] (centipose) : Female	75	CES1 EM Mean	1	Lobe Distribution Percentage (%) Pulmonary Capilliary Blood Volume UA	16.67
			Abundance : UGT2B15 PM Mean	0.07	PT-S3 SLC22A6 (OAT1) / 106 PTC (Relative Values)	1	SC lipid viscosity [top] CV (%) : Female	0	CES1 EM CV (%)	30	Lobe Distribution Percentage (%) Pulmonary Capilliary Blood Volume UA	16.67
			Abundance : UGT2B15 PM CV (%)	33	PT-S3 SLC22A8 (OAT3) / 106 PTC (Relative Values)	1	Corneocyte pH [upper mid] : Male	6.8	CES1 PM Mean	0.11	Lobe Distribution Percentage (%) Pulmonary Capilliary Blood Volume UA	8.33
			Abundance : UGT2B15 UM Mean	0	PT-S3 SLC47As (MATEs) / 106 PTC (Relative Values)	1	Corneocyte pH [upper mid] CV (%) : Male	0	CES1 PM CV (%)	30	Lobe Distribution Percentage (%) Pulmonary Capilliary Blood Volume UA	8.33
			Abundance : UGT2B15 UM CV (%)	0	PT-S3 Apical Influx (Kidney) / 106 PTC (Relative Values)	1	Corneocyte pH [upper mid] : Female	6.8	CES1 UM Mean	0	Lobe Distribution Percentage (%) Pulmonary Mass Volume UA	16.66
			Abundance : UGT2B15 IM Mean	0.47	PT-S3 Basolateral Efflux (Kidney) / 106 PTC (Relative Values)	1	Corneocyte pH [upper mid] CV (%) : Female	0	CES1 UM CV (%)	0	Lobe Distribution Percentage (%) Pulmonary Mass Volume UA	16.67
			Abundance : UGT2B15 IM CV (%)	37	ABCB1 (P-gp/MDR1) ET Mean	1	Corneocyte thickness [upper mid] (µm) : Male	0.67	CES1 IM Mean	0	Lobe Distribution Percentage (%) Pulmonary Mass Volume UA	16.67
			Absolute Abundance : UGT2B15	39	ABCB1 (P-gp/MDR1) ET CV (%)	60	Corneocyte thickness [upper mid] CV (%) : Male	22	CES1 IM CV (%)	0	Lobe Distribution Percentage (%) Pulmonary Mass Volume UA	16.67
			Turnover rate : UGT2B15 Mean	1e-06	ABCB1 (P-gp/MDR1) PT Mean	0	Corneocyte thickness [upper mid] (µm) : Female	0.67	CES2 EM Mean	1	Lobe Distribution Percentage (%) Pulmonary Mass Volume UA	16.67
			Turnover rate : UGT2B15 CV (%)	30	ABCB1 (P-gp/MDR1) PT CV (%)	0	Corneocyte thickness [upper mid] CV (%) : Female	22	CES2 EM CV (%)	30	Lobe Distribution Percentage (%) Pulmonary Mass Volume UA	8.33
			Abundance : UGT2B17 EM Mean	1	ABCB1 (P-gp/MDR1) IT Mean	0	Corneocyte width [upper mid] (µm) : Male	29.6	CES2 PM Mean	0	Lobe Distribution Percentage (%) Pulmonary Mass Volume UA	8.33
			Abundance : UGT2B17 EM CV (%)	28	ABCB1 (P-gp/MDR1) IT CV (%)	0	Corneocyte width [upper mid] CV (%) : Male	5.9	CES2 PM CV (%)	0	Lobe Distribution Percentage (%) Epithelial Lining Fluid Volume UA	16.66
			Abundance : UGT2B17 PM Mean	0.08	ABCB1 (P-gp/MDR1) UT Mean	0	Corneocyte width [upper mid] (µm) : Female	29.6	CES2 UM Mean	0	Lobe Distribution Percentage (%) Epithelial Lining Fluid Volume UA	16.67
			Abundance : UGT2B17 PM CV (%)	40	ABCB1 (P-gp/MDR1) UT CV (%)	0	Corneocyte width [upper mid] CV (%) : Female	5.9	CES2 UM CV (%)	0	Lobe Distribution Percentage (%) Epithelial Lining Fluid Volume UA	16.67
			Abundance : UGT2B17 UM Mean	0	ABCC4 (MRP4) ET Mean	1	Corneocyte length [upper mid] (µm) : Male	36.4	CES2 IM Mean	0	Lobe Distribution Percentage (%) Epithelial Lining Fluid Volume UA	16.67
			Abundance : UGT2B17 UM CV (%)	0	ABCC4 (MRP4) ET CV (%)	60	Corneocyte length [upper mid] CV (%) : Male	5.7	CES2 IM CV (%)	0	Lobe Distribution Percentage (%) Epithelial Lining Fluid Volume UA	16.67
			Abundance : UGT2B17 IM Mean	0.16	ABCC4 (MRP4) PT Mean	0	Corneocyte length [upper mid] (µm) : Female	36.4	Use User ES Option	Yes	Lobe Distribution Percentage (%) Epithelial Lining Fluid Volume UA	8.33
			Abundance : UGT2B17 IM CV (%)	30	ABCC4 (MRP4) PT CV (%)	0	Corneocyte length [upper mid] CV (%) : Female	5.7	User ES EM Mean	1	Lobe Distribution Percentage (%) Epithelial Lining Fluid Volume UA	8.33
			Absolute Abundance : UGT2B17	5.9	ABCC4 (MRP4) IT Mean	0	Hydration level (% water volume) [upper mid] : Male	44.6987	User ES EM CV (%)	30	Use local pH by segment	No
			Turnover rate : UGT2B17 Mean	1e-06	ABCC4 (MRP4) IT CV (%)	0	Hydration level (% water volume) [upper mid] CV (%) : Male	6	User ES PM Mean	0	Basal Influx 1 (Lung) Mean	1
			Turnover rate : UGT2B17 CV (%)	30	ABCC4 (MRP4) UT Mean	0	Hydration level (% water volume) [upper mid] : Female	44.6987	User ES PM CV (%)	0	Basal Influx 1 (Lung) CV (%)	0
			Abundance : UGT2B28 EM Mean	1	ABCC4 (MRP4) UT CV (%)	0	Hydration level (% water volume) [upper mid] CV (%) : Female	6	User ES UM Mean	0	Basal Influx 2 (Lung) Mean	1
			Abundance : UGT2B28 EM CV (%)	30	SLC22A2 (OCT2) ET Mean	1	SC lipid viscosity [upper mid] (centipose) : Male	75	User ES UM CV (%)	0	Basal Influx 2 (Lung) CV (%)	0
			Abundance : UGT2B28 PM Mean	0	SLC22A2 (OCT2) ET CV (%)	60	SC lipid viscosity [upper mid] CV (%) : Male	0	User ES IM Mean	0	Basal Efflux 1 (Lung) Mean	1
			Abundance : UGT2B28 PM CV (%)	0	SLC22A2 (OCT2) PT Mean	0	SC lipid viscosity [upper mid] (centipose) : Female	75	User ES IM CV (%)	0	Basal Efflux 1 (Lung) CV (%)	0
			Abundance : UGT2B28 UM Mean	0	SLC22A2 (OCT2) PT CV (%)	0	SC lipid viscosity [upper mid] CV (%) : Female	0	Achlorhydric Coefficient	8	Basal Efflux 2 (Lung) Mean	1
			Abundance : UGT2B28 UM CV (%)	0	SLC22A2 (OCT2) IT Mean	0	Corneocyte pH [lower mid] : Male	6.8	Achlorhydric Age Power	0	Basal Efflux 2 (Lung) CV (%)	0
			Abundance : UGT2B28 IM Mean	0	SLC22A2 (OCT2) IT CV (%)	0	Corneocyte pH [lower mid] CV (%) : Male	0	Achlorhydric Maximum (%)	8	Apical Influx 1 (Lung) Mean	1
			Abundance : UGT2B28 IM CV (%)	0	SLC22A2 (OCT2) UT Mean	0	Corneocyte pH [lower mid] : Female	6.8	Stomach pH Fed	5	Apical Influx 1 (Lung) CV (%)	0
			Absolute Abundance : UGT2B28	0	SLC22A2 (OCT2) UT CV (%)	0	Corneocyte pH [lower mid] CV (%) : Female	0	Stomach CV pH Fed (%)	25	Apical Influx 2 (Lung) Mean	1
			Turnover rate : UGT2B28 Mean	1e-06	SLC22A6 (OAT1) ET Mean	1	Corneocyte thickness [lower mid] (µm) : Male	0.76	Age < 65 Tff (h)	1.8	Apical Influx 2 (Lung) CV (%)	0
			Turnover rate : UGT2B28 CV (%)	30	SLC22A6 (OAT1) ET CV (%)	60	Corneocyte thickness [lower mid] CV (%) : Male	22	Age < 65 Tff CV (%)	65	Apical Efflux 1 (Lung) Mean	1
			Use User UGT Option	Yes	SLC22A6 (OAT1) PT Mean	0	Corneocyte thickness [lower mid] (µm) : Female	0.76	Age ≥ 65 Tff (h)	3	Apical Efflux 1 (Lung) CV (%)	0
			UGT User	1	SLC22A6 (OAT1) PT CV (%)	0	Corneocyte thickness [lower mid] CV (%) : Female	22	Age ≥ 65 Tff CV (%)	80	Apical Efflux 2 (Lung) Mean	1
			Abundance : User UGT1 EM Mean	1	SLC22A6 (OAT1) IT Mean	0	Corneocyte width [lower mid] (µm) : Male	29.6	Stomach pH Fasted	1.5	Apical Efflux 2 (Lung) CV (%)	0
			Abundance : User UGT1 EM CV (%)	30	SLC22A6 (OAT1) IT CV (%)	0	Corneocyte width [lower mid] CV (%) : Male	5.9	Stomach CV pH Fasted (%)	38
			Abundance : User UGT1 PM Mean	0	SLC22A6 (OAT1) UT Mean	0	Corneocyte width [lower mid] (µm) : Female	29.6	Stomach pH Fed	5	Initial bacteria number	20
			Abundance : User UGT1 PM CV (%)	0	SLC22A6 (OAT1) UT CV (%)	0	Corneocyte width [lower mid] CV (%) : Female	5.9	Stomach CV pH Fed (%)	25
			Abundance : User UGT1 UM Mean	0	SLC22A8 (OAT3) ET Mean	1	Corneocyte length [lower mid] (µm) : Male	36.4	Stomach Bicarbonate Buffer Concentration Fasted (mM)	7.3	Granuloma growth period (days)	200
			Abundance : User UGT1 UM CV (%)	0	SLC22A8 (OAT3) ET CV (%)	60	Corneocyte length [lower mid] CV (%) : Male	5.7	Stomach Bicarbonate Buffer Concentration CV Fasted (%)	30
			Abundance : User UGT1 IM Mean	0	SLC22A8 (OAT3) PT Mean	0	Corneocyte length [lower mid] (µm) : Female	36.4	Stomach Bicarbonate Buffer Concentration Fed (mM)	42.46	Granuloma location Frequency: RLM	1
			Abundance : User UGT1 IM CV (%)	0	SLC22A8 (OAT3) PT CV (%)	0	Corneocyte length [lower mid] CV (%) : Female	5.7	Stomach Bicarbonate Buffer Concentration CV Fed (%)	30	Granuloma location Frequency: RMM	0
			Absolute Abundance : User UGT1	0	SLC22A8 (OAT3) IT Mean	0	Hydration level (% water volume) [lower mid] : Male	55.5388	Stomach Luminal Fluid Velocity Fasted (m/s)	0.032	Granuloma location Frequency: RMM	0
			Turnover rate : User UGT1 Mean	1e-06	SLC22A8 (OAT3) IT CV (%)	0	Hydration level (% water volume) [lower mid] CV (%) : Male	5	Stomach Luminal Fluid Velocity CV Fasted (%)	30	Granuloma location Frequency: LLM	0
			Turnover rate : User UGT1 CV (%)	30	SLC22A8 (OAT3) UT Mean	0	Hydration level (% water volume) [lower mid] : Female	55.5388	Stomach Luminal Fluid Velocity Fed (m/s)	0.032	Granuloma location Frequency: LTM	0
			Use User Cytosolic Enzyme Option	Yes	SLC22A8 (OAT3) UT CV (%)	0	Hydration level (% water volume) [lower mid] CV (%) : Female	5	Stomach Luminal Fluid Velocity CV Fed (%)	30
			User Cyt	1	SLC47As (MATEs) ET Mean	1	SC lipid viscosity [lower mid] (centipose) : Male	75	Stomach Fluid Viscosity Fasted (cP)	3	Macrophage diameter (μm): Mean	21.2
			Abundance : User Cyt1 EM Mean	1	SLC47As (MATEs) ET CV (%)	60	SC lipid viscosity [lower mid] CV (%) : Male	0	Stomach Fluid Viscosity CV Fasted (%)	71	Macrophage fraction (%): Mean	50
			Abundance : User Cyt1 EM CV (%)	30	SLC47As (MATEs) PT Mean	0	SC lipid viscosity [lower mid] (centipose) : Female	75	Stomach Fluid Viscosity Fed (cP)	232	ISF fraction (%): Mean	10
			Abundance : User Cyt1 PM Mean	0	SLC47As (MATEs) PT CV (%)	0	SC lipid viscosity [lower mid] CV (%) : Female	0	Stomach Fluid Viscosity CV Fed (%)	32	ISF fraction: CV (%)	30
			Abundance : User Cyt1 PM CV (%)	0	SLC47As (MATEs) IT Mean	0	Corneocyte pH [bottom] : Male	6.8	Stomach CMC fasted (mM)	1	Outer-caseum fraction (%): Mean	20
			Abundance : User Cyt1 UM Mean	0	SLC47As (MATEs) IT CV (%)	0	Corneocyte pH [bottom] CV (%) : Male	0	Stomach CMC fed (mM)	1	Outer-caseum fraction: CV (%)	30
			Abundance : User Cyt1 UM CV (%)	0	SLC47As (MATEs) UT Mean	0	Corneocyte pH [bottom] : Female	6.8	Stomach Bile fasted (mM)	0.29	Inner-caseum fraction (%): Mean	20
			Abundance : User Cyt1 IM Mean	0	SLC47As (MATEs) UT CV (%)	0	Corneocyte pH [bottom] CV (%) : Female	0	Stomach Bile fasted CV (%)	141	Inner-caseum fraction: CV (%)	30
			Abundance : User Cyt1 IM CV (%)	0	Apical Influx (Kidney) ET Mean	1	Corneocyte thickness [bottom] (µm) : Male	0.86	Stomach Bile fed (mM)	0.29
			Use User Cytosolic Enzyme Option	Yes	Apical Influx (Kidney) ET CV (%)	60	Corneocyte thickness [bottom] CV (%) : Male	22	Stomach Bile fed CV (%)	100	Local pH: macrophage	5
			User Cyt	2	Apical Influx (Kidney) PT Mean	0	Corneocyte thickness [bottom] (µm) : Female	0.86	Duodenum Blood Flow (Qvilli %)	8.8	Local pH: ISF	6.7
			Abundance : User Cyt2 EM Mean	1	Apical Influx (Kidney) PT CV (%)	0	Corneocyte thickness [bottom] CV (%) : Female	22	Duodenum Transit Time (% Total)	4.6	Local pH: caseum	7.4
			Abundance : User Cyt2 EM CV (%)	30	Apical Influx (Kidney) IT Mean	0	Corneocyte width [bottom] (µm) : Male	29.6	Duodenum CYP3A (% Total)	13.76
			Abundance : User Cyt2 PM Mean	0	Apical Influx (Kidney) IT CV (%)	0	Corneocyte width [bottom] CV (%) : Male	5.9	Duodenum S9PPI (% Total)	14.88	Uptake (macrophage): Mean	1
			Abundance : User Cyt2 PM CV (%)	0	Apical Influx (Kidney) UT Mean	0	Corneocyte width [bottom] (µm) : Female	29.6	Duodenum MPPI/CYP (% Total)	13.76	Uptake (macrophage): CV (%)	1
			Abundance : User Cyt2 UM Mean	0	Apical Influx (Kidney) UT CV (%)	0	Corneocyte width [bottom] CV (%) : Female	5.9	Duodenum CPPI (% Total)	14.88	Efflux (macrophage): Mean	1
			Abundance : User Cyt2 UM CV (%)	0	Basolateral Efflux (Kidney) ET Mean	1	Corneocyte length [bottom] (µm) : Male	36.4	Duodenum pH Fasted	6.4	Efflux (macrophage): CV (%)	0
			Abundance : User Cyt2 IM Mean	0	Basolateral Efflux (Kidney) ET CV (%)	60	Corneocyte length [bottom] CV (%) : Male	5.7	Duodenum CV pH Fasted (%)	16	BN pre-treatment number: Mean	80
			Abundance : User Cyt2 IM CV (%)	0	Basolateral Efflux (Kidney) PT Mean	0	Corneocyte length [bottom] (µm) : Female	36.4	Duodenum pH Fed	5.4	BN pre-treatment number: CV (%)	30
			Use User Cytosolic Enzyme Option	Yes	Basolateral Efflux (Kidney) PT CV (%)	0	Corneocyte length [bottom] CV (%) : Female	5.7	Duodenum CV pH Fed (%)	11
			User Cyt	3	Basolateral Efflux (Kidney) IT Mean	0	Hydration level (% water volume) [bottom] : Male	66.4	Duodenum Bicarbonate Buffer Concentration Fasted (mM)	6.53
			Abundance : User Cyt3 EM Mean	1	Basolateral Efflux (Kidney) IT CV (%)	0	Hydration level (% water volume) [bottom] CV (%) : Male	4	Duodenum Bicarbonate Buffer Concentration CV Fasted (%)	30
			Abundance : User Cyt3 EM CV (%)	30	Basolateral Efflux (Kidney) UT Mean	0	Hydration level (% water volume) [bottom] : Female	66.4	Duodenum Bicarbonate Buffer Concentration Fed (mM)	34.19
			Abundance : User Cyt3 PM Mean	0	Basolateral Efflux (Kidney) UT CV (%)	0	Hydration level (% water volume) [bottom] CV (%) : Female	4	Duodenum Bicarbonate Buffer Concentration CV Fed (%)	30
			Abundance : User Cyt3 PM CV (%)	0			SC lipid viscosity [bottom] (centipose) : Male	75	Duodenum Luminal Fluid Velocity Fasted (m/s)	0.005
			Abundance : User Cyt3 UM Mean	0			SC lipid viscosity [bottom] CV (%) : Male	0	Duodenum Luminal Fluid Velocity CV Fasted (%)	30
			Abundance : User Cyt3 UM CV (%)	0			SC lipid viscosity [bottom] (centipose) : Female	75	Duodenum Luminal Fluid Velocity Fed (m/s)	0.005
			Abundance : User Cyt3 IM Mean	0			SC lipid viscosity [bottom] CV (%) : Female	0	Duodenum Luminal Fluid Velocity CV Fed (%)	30
			Abundance : User Cyt3 IM CV (%)	0			Viable Epidermis thickness (µm) : Male	41.9655	Duodenum Fluid Viscosity Fasted (cP)	3
			Use User Cytosolic Enzyme Option	Yes			Viable Epidermis thickness CV (%) : Male	19	Duodenum Fluid Viscosity CV Fasted (%)	71
			User Cyt	4			Viable Epidermis thickness (µm) : Female	41.9655	Duodenum Fluid Viscosity Fed (cP)	65
			Abundance : User Cyt4 EM Mean	1			Viable Epidermis thickness CV (%) : Female	19	Duodenum Fluid Viscosity CV Fed (%)	27
			Abundance : User Cyt4 EM CV (%)	30			Dermis thickness (µm) : Male	1240	Duodenum CMC fasted (mM)	1
			Abundance : User Cyt4 PM Mean	0			Dermis thickness CV (%) : Male	20	Duodenum CMC fed (mM)	1
			Abundance : User Cyt4 PM CV (%)	0			Dermis thickness (µm) : Female	1240	Duodenum Bile fasted (mM)	3.31
			Abundance : User Cyt4 UM Mean	0			Dermis thickness CV (%) : Female	20	Duodenum Bile fasted CV (%)	97
			Abundance : User Cyt4 UM CV (%)	0			Subcutis thickness (mm) : Male	1.91	Duodenum Bile fed (mM)	8.74
			Abundance : User Cyt4 IM Mean	0			Subcutis thickness CV (%) : Male	55.72	Duodenum Bile fed CV (%)	79
			Abundance : User Cyt4 IM CV (%)	0			Subcutis thickness (mm) : Female	1.91	Duodenum Channel Depth Mean (µm)	522.78
			Abundance : CES1 EM Mean	1			Subcutis thickness CV (%) : Female	55.72	Duodenum Channel Depth CV (%)	32.72
			Abundance : CES1 EM CV (%)	46			Muscle thickness (mm) : Male	29.88	Duodenum Channel Width Mean (µm)	28.03
			Abundance : CES1 PM Mean	0.11			Muscle thickness CV (%) : Male	61.44	Duodenum Channel Width CV (%)	28.69
			Abundance : CES1 PM CV (%)	30			Muscle thickness (mm) : Female	23.81	Duodenum Mean Thickness Mean (µm)	128.35
			Abundance : CES1 UM Mean	0			Muscle thickness CV (%) : Female	14.85	Duodenum Mean Thickness CV (%)	8.1
			Abundance : CES1 UM CV (%)	0			Dermis regional blood flow scalar : Male	0.909226	Duodenum Fold Expansion Mean	1
			Abundance : CES1 IM Mean	0			Dermis regional blood flow scalar CV (%) : Male	0	Duodenum Fold Expansion CV (%)	0
			Abundance : CES1 IM CV (%)	0			Dermis regional blood flow scalar : Female	0.909226	Duodenum Pore Radius Mean	8.6
			Abundance : CES2 EM Mean	1			Dermis regional blood flow scalar CV (%) : Female	0	Duodenum Pore Radius CV (%)	0
			Abundance : CES2 EM CV (%)	35			Subcutis regional blood flow scalar : Male	1	Duodenum Unstirred Layer Thickness Mean (µm)	170
			Abundance : CES2 PM Mean	0			Subcutis regional blood flow scalar CV (%) : Male	0	Duodenum Unstirred Layer Thickness CV (%)	22.35
			Abundance : CES2 PM CV (%)	0			Subcutis regional blood flow scalar : Female	1	Duodenum Unstirred Layer pH	6.5
			Abundance : CES2 UM Mean	0			Subcutis regional blood flow scalar CV (%) : Female	0	Duodenum Unstirred Layer CV (%)	0.5
			Abundance : CES2 UM CV (%)	0			Muscle regional blood flow scalar : Male	1	Duodenum ABCB1 (P-gp/MDR1) (Relative values)	0.51
			Abundance : CES2 IM Mean	0			Muscle regional blood flow scalar CV (%) : Male	0	Duodenum ABCC1 (MRP1) (Relative values)	0.45
			Abundance : CES2 IM CV (%)	0			Muscle regional blood flow scalar : Female	1	Duodenum ABCC2 (MRP2) (Relative values)	1.41
			Use User ES Option	Yes			Muscle regional blood flow scalar CV (%) : Female	0	Duodenum ABCC3 (MRP3) (Relative values)	2.15
			Abundance : User ES EM Mean	1					Duodenum ABCC4 (MRP4) (Relative values)	1.02
			Abundance : User ES EM CV (%)	30			MPMLA - Forearm Outer (dorsal)		Duodenum ABCG2 (BCRP) (Relative values)	0.47
			Abundance : User ES PM Mean	0			Skin surface pH : Male	4.9	Duodenum SLC2A2 (GLUT2) (Relative values)	1
			Abundance : User ES PM CV (%)	0			Skin surface pH CV (%) : Male	8.8	Duodenum SLC10A2 (ASBT/IBAT) (Relative values)	16.49
			Abundance : User ES UM Mean	0			Skin surface pH : Female	4.9	Duodenum SLC15A1 (PEPT1) (Relative values)	0.94
			Abundance : User ES UM CV (%)	0			Skin surface pH CV (%) : Female	7.4	Duodenum SLC16A1 (MCT1) (Relative values)	1.25
			Abundance : User ES IM Mean	0			Skin temperature (°C) : Male	32	Duodenum SLCO2B1 (OATP2B1) (Relative values)	0.73
			Abundance : User ES IM CV (%)	0			Skin temperature CV (%) : Male	0	Duodenum SLCO4C1 (OATP4C1) (Relative values)	1
			CV for non P450 Clearance	30			Skin temperature (°C) : Female	32	Duodenum SLC22A1 (OCT1) (Relative values)	1.03
			Absolute Abundance : ABCB1 (P-gp/MDR1) (pmol/10^6 hepatocytes)	0.21			Skin temperature CV (%) : Female	0	Duodenum SLC22A3 (OCT3) (Relative values)	1.19
			Abundance : ABCB1 (P-gp/MDR1) ET Mean	1			Shape of corneocyte : Male	Cuboid (brick)	Duodenum SLC22A4 (OCTN1) (Relative values)	0.46
			Abundance : ABCB1 (P-gp/MDR1) ET CV (%)	61			Shape of corneocyte : Female	Cuboid (brick)	Duodenum SLC51A/B (OST-α/β) (Relative values)	0.56
			Abundance : ABCB1 (P-gp/MDR1) PT Mean	0			Number of SC layers : Male	22	Duodenum Apical Influx (Intestine) (Relative values)	1
			Abundance : ABCB1 (P-gp/MDR1) PT CV (%)	0			Number of SC layers CV (%) : Male	14	Duodenum Apical Efflux (Intestine) (Relative values)	1
			Abundance : ABCB1 (P-gp/MDR1) IT Mean	0			Number of SC layers : Female	22	Duodenum Basolateral Influx (Intestine) (Relative values)	1
			Abundance : ABCB1 (P-gp/MDR1) IT CV (%)	0			Number of SC layers CV (%) : Female	30.3	Duodenum Basolateral Efflux (Intestine) (Relative values)	1
			Abundance : ABCB1 (P-gp/MDR1) UT Mean	0			Water density (gm/cm3) : Male	1	Jejunum I Blood Flow (Qvilli %)	24.2
			Abundance : ABCB1 (P-gp/MDR1) UT CV (%)	0			Water density CV (%) : Male	0	Jejunum I Transit Time (% Total)	17.3
			Absolute Abundance : ABCB11 (BSEP) (pmol/10^6 hepatocytes)	0.89			Water density (gm/cm3) : Female	1	Jejunum I CYP3A (% Total)	27.24
			Abundance : ABCB11 (BSEP) ET Mean	1			Water density CV (%) : Female	0	Jejunum I S9PPI (% Total)	26.9
			Abundance : ABCB11 (BSEP) ET CV (%)	14			SC lipids density (gm/cm3) : Male	0.9	Jejunum I MPPI/CYP (% Total)	27.24
			Abundance : ABCB11 (BSEP) PT Mean	0			SC lipids density CV (%) : Male	0	Jejunum I CPPI (% Total)	26.9
			Abundance : ABCB11 (BSEP) PT CV (%)	0			SC lipids density (gm/cm3) : Female	0.9	Jejunum I pH Fasted	6.5
			Abundance : ABCB11 (BSEP) IT Mean	0			SC lipids density CV (%) : Female	0	Jejunum I CV pH Fasted (%)	13
			Abundance : ABCB11 (BSEP) IT CV (%)	0			SC proteins density (gm/cm3) : Male	1.37	Jejunum I pH Fed	6.5
			Abundance : ABCB11 (BSEP) UT Mean	0			SC proteins density CV (%) : Male	0	Jejunum I CV pH Fed (%)	13
			Abundance : ABCB11 (BSEP) UT CV (%)	0			SC proteins density (gm/cm3) : Female	1.37	Jejunum I Bicarbonate Buffer Concentration Fasted (mM)	9.94
			Absolute Abundance : ABCC2 (MRP2) (pmol/10^6 hepatocytes)	0.37			SC proteins density CV (%) : Female	0	Jejunum I Bicarbonate Buffer Concentration CV Fasted (%)	30
			Abundance : ABCC2 (MRP2) ET Mean	1			Intercellular lipid thickness of SC (µm) : Male	0.091	Jejunum I Bicarbonate Buffer Concentration Fed (mM)	17.34
			Abundance : ABCC2 (MRP2) ET CV (%)	60			Intercellular lipid thickness of SC CV (%) : Male	0	Jejunum I Bicarbonate Buffer Concentration CV Fed (%)	30
			Abundance : ABCC2 (MRP2) PT Mean	0			Intercellular lipid thickness of SC (µm) : Female	0.091	Jejunum I Luminal Fluid Velocity Fasted (m/s)	0.0013
			Abundance : ABCC2 (MRP2) PT CV (%)	0			Intercellular lipid thickness of SC CV (%) : Female	0	Jejunum I Luminal Fluid Velocity CV Fasted (%)	56
			Abundance : ABCC2 (MRP2) IT Mean	0			Tortuosity of lipid diffusion pathway of SC : Male	12.7	Jejunum I Luminal Fluid Velocity Fed (m/s)	0.0013
			Abundance : ABCC2 (MRP2) IT CV (%)	0			Tortuosity of lipid diffusion pathway of SC CV (%) : Male	18	Jejunum I Luminal Fluid Velocity CV Fed (%)	56
			Abundance : ABCC2 (MRP2) UT Mean	0			Tortuosity of lipid diffusion pathway of SC : Female	12.7	Jejunum I Fluid Viscosity Fasted (cP)	3
			Abundance : ABCC2 (MRP2) UT CV (%)	0			Tortuosity of lipid diffusion pathway of SC CV (%) : Female	18	Jejunum I Fluid Viscosity CV Fasted (%)	71
			Absolute Abundance : ABCC3 (MRP3) (pmol/10^6 hepatocytes)	0.19			Hair follicle diameter (µm) : Male	77.7	Jejunum I Fluid Viscosity Fed (cP)	33
			Abundance : ABCC3 (MRP3) ET Mean	1			Hair follicle diameter CV (%) : Male	32	Jejunum I Fluid Viscosity CV Fed (%)	36
			Abundance : ABCC3 (MRP3) ET CV (%)	104			Hair follicle diameter (µm) : Female	77.7	Jejunum I CMC fasted (mM)	1
			Abundance : ABCC3 (MRP3) PT Mean	0			Hair follicle diameter CV (%) : Female	32	Jejunum I CMC fed (mM)	1
			Abundance : ABCC3 (MRP3) PT CV (%)	0			Hair follicle density (N/cm2) : Male	18	Jejunum I Bile fasted (mM)	2.3
			Abundance : ABCC3 (MRP3) IT Mean	0			Hair follicle density CV (%) : Male	39	Jejunum I Bile fasted CV (%)	100
			Abundance : ABCC3 (MRP3) IT CV (%)	0			Hair follicle density (N/cm2) : Female	18	Jejunum I Bile fed (mM)	10.03
			Abundance : ABCC3 (MRP3) UT Mean	0			Hair follicle density CV (%) : Female	39	Jejunum I Bile fed CV (%)	73
			Abundance : ABCC3 (MRP3) UT CV (%)	0			Hair shaft diameter (µm) : Male	18	Jejunum I Channel Depth Mean (µm)	448.81
			Absolute Abundance : ABCC4 (MRP4) (pmol/10^6 hepatocytes)	0			Hair shaft diameter CV (%) : Male	34	Jejunum I Channel Depth CV (%)	21.82
			Abundance : ABCC4 (MRP4) ET Mean	1			Hair shaft diameter (µm) : Female	18	Jejunum I Channel Width Mean (µm)	22.44
			Abundance : ABCC4 (MRP4) ET CV (%)	60			Hair shaft diameter CV (%) : Female	34	Jejunum I Channel Width CV (%)	31.68
			Abundance : ABCC4 (MRP4) PT Mean	0			Sebum viscosity (centipose) : Male	40	Jejunum I Mean Thickness Mean (µm)	137.7
			Abundance : ABCC4 (MRP4) PT CV (%)	0			Sebum viscosity CV (%) : Male	0	Jejunum I Mean Thickness CV (%)	14.42
			Abundance : ABCC4 (MRP4) IT Mean	0			Sebum viscosity (centipose) : Female	40	Jejunum I Fold Expansion Mean	1.97
			Abundance : ABCC4 (MRP4) IT CV (%)	0			Sebum viscosity CV (%) : Female	0	Jejunum I Fold Expansion CV (%)	24.54
			Abundance : ABCC4 (MRP4) UT Mean	0			Corneocyte pH [top] : Male	6.8	Jejunum I Pore Radius Mean	8.6
			Abundance : ABCC4 (MRP4) UT CV (%)	0			Corneocyte pH [top] CV (%) : Male	0	Jejunum I Pore Radius CV (%)	0
			Absolute Abundance : ABCC6 (MRP6) (pmol/10^6 hepatocytes)	0			Corneocyte pH [top] : Female	6.8	Jejunum I Unstirred Layer Thickness Mean (µm)	123
			Abundance : ABCC6 (MRP6) ET Mean	1			Corneocyte pH [top] CV (%) : Female	0	Jejunum I Unstirred Layer Thickness CV (%)	3
			Abundance : ABCC6 (MRP6) ET CV (%)	60			Corneocyte thickness [top] (µm) : Male	0.69	Jejunum I Unstirred Layer pH	6.5
			Abundance : ABCC6 (MRP6) PT Mean	0			Corneocyte thickness [top] CV (%) : Male	22	Jejunum I Unstirred Layer CV (%)	0.5
			Abundance : ABCC6 (MRP6) PT CV (%)	0			Corneocyte thickness [top] (µm) : Female	0.69	Jejunum I ABCB1 (P-gp/MDR1) (pmol/mg total membrane protein)	0.4
			Abundance : ABCC6 (MRP6) IT Mean	0			Corneocyte thickness [top] CV (%) : Female	22	Jejunum I ABCC1 (MRP1) (pmol/mg total membrane protein)	0
			Abundance : ABCC6 (MRP6) IT CV (%)	0			Corneocyte width [top] (µm) : Male	29.6	Jejunum I ABCC2 (MRP2) (pmol/mg total membrane protein)	0.86
			Abundance : ABCC6 (MRP6) UT Mean	0			Corneocyte width [top] CV (%) : Male	5.9	Jejunum I ABCC3 (MRP3) (pmol/mg total membrane protein)	0.58
			Abundance : ABCC6 (MRP6) UT CV (%)	0			Corneocyte width [top] (µm) : Female	29.6	Jejunum I ABCC4 (MRP4) (pmol/mg total membrane protein)	0
			Absolute Abundance : ABCG2 (BCRP) (pmol/10^6 hepatocytes)	0.05			Corneocyte width [top] CV (%) : Female	5.9	Jejunum I ABCG2 (BCRP) (pmol/mg total membrane protein)	0.34
			Abundance : ABCG2 (BCRP) ET Mean	1			Corneocyte length [top] (µm) : Male	36.4	Jejunum I SLC2A2 (GLUT2) (pmol/mg total membrane protein)	0
			Abundance : ABCG2 (BCRP) ET CV (%)	42			Corneocyte length [top] CV (%) : Male	5.7	Jejunum I SLC10A2 (ASBT/IBAT) (pmol/mg total membrane protein)	0.01
			Abundance : ABCG2 (BCRP) PT Mean	0			Corneocyte length [top] (µm) : Female	36.4	Jejunum I SLC15A1 (PEPT1) (pmol/mg total membrane protein)	3.69
			Abundance : ABCG2 (BCRP) PT CV (%)	0			Corneocyte length [top] CV (%) : Female	5.7	Jejunum I SLC16A1 (MCT1) (pmol/mg total membrane protein)	0
			Abundance : ABCG2 (BCRP) IT Mean	0			Hydration level (% water volume) [top] : Male	33.9	Jejunum I SLCO2B1 (OATP2B1) (pmol/mg total membrane protein)	0.4
			Abundance : ABCG2 (BCRP) IT CV (%)	0			Hydration level (% water volume) [top] CV (%) : Male	9	Jejunum I SLCO4C1 (OATP4C1) (pmol/mg total membrane protein)	0
			Abundance : ABCG2 (BCRP) UT Mean	0			Hydration level (% water volume) [top] : Female	33.9	Jejunum I SLC22A1 (OCT1) (pmol/mg total membrane protein)	0.65
			Abundance : ABCG2 (BCRP) UT CV (%)	0			Hydration level (% water volume) [top] CV (%) : Female	9	Jejunum I SLC22A3 (OCT3) (pmol/mg total membrane protein)	0.06
			Absolute Abundance : SLC9A1 (ENT1) (pmol/10^6 hepatocytes)	0			SC lipid viscosity [top] (centipose) : Male	75	Jejunum I SLC22A4 (OCTN1) (pmol/mg total membrane protein)	0
			Abundance : SLC9A1 (ENT1) ET Mean	1			SC lipid viscosity [top] CV (%) : Male	0	Jejunum I SLC51A/B (OST-α/β) (pmol/mg total membrane protein)	0.47
			Abundance : SLC9A1 (ENT1) ET CV (%)	60			SC lipid viscosity [top] (centipose) : Female	75	Jejunum I Apical Influx (Intestine) (pmol/mg total membrane protein)	0
			Abundance : SLC9A1 (ENT1) PT Mean	0			SC lipid viscosity [top] CV (%) : Female	0	Jejunum I Apical Efflux (Intestine) (pmol/mg total membrane protein)	0
			Abundance : SLC9A1 (ENT1) PT CV (%)	0			Corneocyte pH [upper mid] : Male	6.8	Jejunum I Basolateral Influx (Intestine) (pmol/mg total membrane protein)	0
			Abundance : SLC9A1 (ENT1) IT Mean	0			Corneocyte pH [upper mid] CV (%) : Male	0	Jejunum I Basolateral Efflux (Intestine) (pmol/mg total membrane protein)	0
			Abundance : SLC9A1 (ENT1) IT CV (%)	0			Corneocyte pH [upper mid] : Female	6.8	Jejunum I ABCB1 (P-gp/MDR1) (Relative values)	1
			Abundance : SLC9A1 (ENT1) UT Mean	0			Corneocyte pH [upper mid] CV (%) : Female	0	Jejunum I ABCC1 (MRP1) (Relative values)	1
			Abundance : SLC9A1 (ENT1) UT CV (%)	0			Corneocyte thickness [upper mid] (µm) : Male	0.79	Jejunum I ABCC2 (MRP2) (Relative values)	1
			Absolute Abundance : SLC9A2 (ENT2) (pmol/10^6 hepatocytes)	0			Corneocyte thickness [upper mid] CV (%) : Male	22	Jejunum I ABCC3 (MRP3) (Relative values)	1
			Abundance : SLC9A2 (ENT2) ET Mean	1			Corneocyte thickness [upper mid] (µm) : Female	0.79	Jejunum I ABCC4 (MRP4) (Relative values)	1
			Abundance : SLC9A2 (ENT2) ET CV (%)	60			Corneocyte thickness [upper mid] CV (%) : Female	22	Jejunum I ABCG2 (BCRP) (Relative values)	1
			Abundance : SLC9A2 (ENT2) PT Mean	0			Corneocyte width [upper mid] (µm) : Male	29.6	Jejunum I SLC2A2 (GLUT2) (Relative values)	1
			Abundance : SLC9A2 (ENT2) PT CV (%)	0			Corneocyte width [upper mid] CV (%) : Male	5.9	Jejunum I SLC10A2 (ASBT/IBAT) (Relative values)	1
			Abundance : SLC9A2 (ENT2) IT Mean	0			Corneocyte width [upper mid] (µm) : Female	29.6	Jejunum I SLC15A1 (PEPT1) (Relative values)	1
			Abundance : SLC9A2 (ENT2) IT CV (%)	0			Corneocyte width [upper mid] CV (%) : Female	5.9	Jejunum I SLC16A1 (MCT1) (Relative values)	1
			Abundance : SLC9A2 (ENT2) UT Mean	0			Corneocyte length [upper mid] (µm) : Male	36.4	Jejunum I SLCO2B1 (OATP2B1) (Relative values)	1
			Abundance : SLC9A2 (ENT2) UT CV (%)	0			Corneocyte length [upper mid] CV (%) : Male	5.7	Jejunum I SLCO4C1 (OATP4C1) (Relative values)	1
			Absolute Abundance : SLC10A1 (NTCP) (pmol/10^6 hepatocytes)	0.81			Corneocyte length [upper mid] (µm) : Female	36.4	Jejunum I SLC22A1 (OCT1) (Relative values)	1
			Abundance : SLC10A1 (NTCP) ET Mean	1			Corneocyte length [upper mid] CV (%) : Female	5.7	Jejunum I SLC22A3 (OCT3) (Relative values)	1
			Abundance : SLC10A1 (NTCP) ET CV (%)	41			Hydration level (% water volume) [upper mid] : Male	44.6987	Jejunum I SLC22A4 (OCTN1) (Relative values)	1
			Abundance : SLC10A1 (NTCP) PT Mean	0			Hydration level (% water volume) [upper mid] CV (%) : Male	6	Jejunum I SLC51A/B (OST-α/β) (Relative values)	1
			Abundance : SLC10A1 (NTCP) PT CV (%)	0			Hydration level (% water volume) [upper mid] : Female	44.6987	Jejunum I Apical Influx (Intestine) (Relative values)	1
			Abundance : SLC10A1 (NTCP) IT Mean	0			Hydration level (% water volume) [upper mid] CV (%) : Female	6	Jejunum I Apical Efflux (Intestine) (Relative values)	1
			Abundance : SLC10A1 (NTCP) IT CV (%)	0			SC lipid viscosity [upper mid] (centipose) : Male	75	Jejunum I Basolateral Influx (Intestine) (Relative values)	1
			Abundance : SLC10A1 (NTCP) UT Mean	0			SC lipid viscosity [upper mid] CV (%) : Male	0	Jejunum I Basolateral Efflux (Intestine) (Relative values)	1
			Abundance : SLC10A1 (NTCP) UT CV (%)	0			SC lipid viscosity [upper mid] (centipose) : Female	75	Jejunum II Blood Flow (Qvilli %)	24.2
			Absolute Abundance : SLC16A1 (MCT1) (pmol/10^6 hepatocytes)	0			SC lipid viscosity [upper mid] CV (%) : Female	0	Jejunum II Transit Time (% Total)	17.3
			Abundance : SLC16A1 (MCT1) ET Mean	1			Corneocyte pH [lower mid] : Male	6.8	Jejunum II CYP3A (% Total)	27.24
			Abundance : SLC16A1 (MCT1) ET CV (%)	60			Corneocyte pH [lower mid] CV (%) : Male	0	Jejunum II S9PPI (% Total)	26.9
			Abundance : SLC16A1 (MCT1) PT Mean	0			Corneocyte pH [lower mid] : Female	6.8	Jejunum II MPPI/CYP (% Total)	27.24
			Abundance : SLC16A1 (MCT1) PT CV (%)	0			Corneocyte pH [lower mid] CV (%) : Female	0	Jejunum II CPPI (% Total)	26.9
			Abundance : SLC16A1 (MCT1) IT Mean	0			Corneocyte thickness [lower mid] (µm) : Male	0.89	Jejunum II pH Fasted	6.6
			Abundance : SLC16A1 (MCT1) IT CV (%)	0			Corneocyte thickness [lower mid] CV (%) : Male	22	Jejunum II CV pH Fasted (%)	11
			Abundance : SLC16A1 (MCT1) UT Mean	0			Corneocyte thickness [lower mid] (µm) : Female	0.89	Jejunum II pH Fed	6.6
			Abundance : SLC16A1 (MCT1) UT CV (%)	0			Corneocyte thickness [lower mid] CV (%) : Female	22	Jejunum II CV pH Fed (%)	11
			Absolute Abundance : SLCO1B1 (OATP1B1) (pmol/10^6 hepatocytes)	4.28			Corneocyte width [lower mid] (µm) : Male	29.6	Jejunum II Bicarbonate Buffer Concentration Fasted (mM)	9.94
			Abundance : SLCO1B1 (OATP1B1) ET Mean	1			Corneocyte width [lower mid] CV (%) : Male	5.9	Jejunum II Bicarbonate Buffer Concentration CV Fasted (%)	30
			Abundance : SLCO1B1 (OATP1B1) ET CV (%)	74			Corneocyte width [lower mid] (µm) : Female	29.6	Jejunum II Bicarbonate Buffer Concentration Fed (mM)	17.34
			Abundance : SLCO1B1 (OATP1B1) PT Mean	0.37			Corneocyte width [lower mid] CV (%) : Female	5.9	Jejunum II Bicarbonate Buffer Concentration CV Fed (%)	30
			Abundance : SLCO1B1 (OATP1B1) PT CV (%)	35			Corneocyte length [lower mid] (µm) : Male	36.4	Jejunum II Luminal Fluid Velocity Fasted (m/s)	0.0013
			Abundance : SLCO1B1 (OATP1B1) IT Mean	0.68			Corneocyte length [lower mid] CV (%) : Male	5.7	Jejunum II Luminal Fluid Velocity CV Fasted (%)	56
			Abundance : SLCO1B1 (OATP1B1) IT CV (%)	54			Corneocyte length [lower mid] (µm) : Female	36.4	Jejunum II Luminal Fluid Velocity Fed (m/s)	0.0013
			Abundance : SLCO1B1 (OATP1B1) UT Mean	1.47			Corneocyte length [lower mid] CV (%) : Female	5.7	Jejunum II Luminal Fluid Velocity CV Fed (%)	56
			Abundance : SLCO1B1 (OATP1B1) UT CV (%)	46			Hydration level (% water volume) [lower mid] : Male	55.5388	Jejunum II Fluid Viscosity Fasted (cP)	3
			Absolute Abundance : SLCO1B3 (OATP1B3) (pmol/10^6 hepatocytes)	4.3			Hydration level (% water volume) [lower mid] CV (%) : Male	5	Jejunum II Fluid Viscosity CV Fasted (%)	71
			Abundance : SLCO1B3 (OATP1B3) ET Mean	1			Hydration level (% water volume) [lower mid] : Female	55.5388	Jejunum II Fluid Viscosity Fed (cP)	12
			Abundance : SLCO1B3 (OATP1B3) ET CV (%)	49			Hydration level (% water volume) [lower mid] CV (%) : Female	5	Jejunum II Fluid Viscosity CV Fed (%)	14
			Abundance : SLCO1B3 (OATP1B3) PT Mean	0			SC lipid viscosity [lower mid] (centipose) : Male	75	Jejunum II CMC fasted (mM)	1
			Abundance : SLCO1B3 (OATP1B3) PT CV (%)	0			SC lipid viscosity [lower mid] CV (%) : Male	0	Jejunum II CMC fed (mM)	1
			Abundance : SLCO1B3 (OATP1B3) IT Mean	0			SC lipid viscosity [lower mid] (centipose) : Female	75	Jejunum II Bile fasted (mM)	3.55
			Abundance : SLCO1B3 (OATP1B3) IT CV (%)	0			SC lipid viscosity [lower mid] CV (%) : Female	0	Jejunum II Bile fasted CV (%)	42
			Abundance : SLCO1B3 (OATP1B3) UT Mean	0			Corneocyte pH [bottom] : Male	6.8	Jejunum II Bile fed (mM)	4.79
			Abundance : SLCO1B3 (OATP1B3) UT CV (%)	0			Corneocyte pH [bottom] CV (%) : Male	0	Jejunum II Bile fed CV (%)	66
			Absolute Abundance : SLCO2B1 (OATP2B1) (pmol/10^6 hepatocytes)	1.38			Corneocyte pH [bottom] : Female	6.8	Jejunum II Channel Depth Mean (µm)	448.81
			Abundance : SLCO2B1 (OATP2B1) ET Mean	1			Corneocyte pH [bottom] CV (%) : Female	0	Jejunum II Channel Depth CV (%)	21.82
			Abundance : SLCO2B1 (OATP2B1) ET CV (%)	41			Corneocyte thickness [bottom] (µm) : Male	1	Jejunum II Channel Width Mean (µm)	22.44
			Abundance : SLCO2B1 (OATP2B1) PT Mean	0			Corneocyte thickness [bottom] CV (%) : Male	22	Jejunum II Channel Width CV (%)	31.68
			Abundance : SLCO2B1 (OATP2B1) PT CV (%)	0			Corneocyte thickness [bottom] (µm) : Female	1	Jejunum II Mean Thickness Mean (µm)	137.7
			Abundance : SLCO2B1 (OATP2B1) IT Mean	0			Corneocyte thickness [bottom] CV (%) : Female	22	Jejunum II Mean Thickness CV (%)	14.42
			Abundance : SLCO2B1 (OATP2B1) IT CV (%)	0			Corneocyte width [bottom] (µm) : Male	29.6	Jejunum II Fold Expansion Mean	1.38
			Abundance : SLCO2B1 (OATP2B1) UT Mean	0			Corneocyte width [bottom] CV (%) : Male	5.9	Jejunum II Fold Expansion CV (%)	20.19
			Abundance : SLCO2B1 (OATP2B1) UT CV (%)	0			Corneocyte width [bottom] (µm) : Female	29.6	Jejunum II Pore Radius Mean	8.6
			Absolute Abundance : SLC22A1 (OCT1) (pmol/10^6 hepatocytes)	1.63			Corneocyte width [bottom] CV (%) : Female	5.9	Jejunum II Pore Radius CV (%)	0
			Abundance : SLC22A1 (OCT1) ET Mean	1			Corneocyte length [bottom] (µm) : Male	36.4	Jejunum II Unstirred Layer Thickness Mean (µm)	123
			Abundance : SLC22A1 (OCT1) ET CV (%)	90			Corneocyte length [bottom] CV (%) : Male	5.7	Jejunum II Unstirred Layer Thickness CV (%)	3
			Abundance : SLC22A1 (OCT1) PT Mean	0			Corneocyte length [bottom] (µm) : Female	36.4	Jejunum II Unstirred Layer pH	6.5
			Abundance : SLC22A1 (OCT1) PT CV (%)	0			Corneocyte length [bottom] CV (%) : Female	5.7	Jejunum II Unstirred Layer CV (%)	0.5
			Abundance : SLC22A1 (OCT1) IT Mean	0			Hydration level (% water volume) [bottom] : Male	66.4	Jejunum II ABCB1 (P-gp/MDR1) (Relative values)	1.46
			Abundance : SLC22A1 (OCT1) IT CV (%)	0			Hydration level (% water volume) [bottom] CV (%) : Male	4	Jejunum II ABCC1 (MRP1) (Relative values)	0.88
			Abundance : SLC22A1 (OCT1) UT Mean	0			Hydration level (% water volume) [bottom] : Female	66.4	Jejunum II ABCC2 (MRP2) (Relative values)	1
			Abundance : SLC22A1 (OCT1) UT CV (%)	0			Hydration level (% water volume) [bottom] CV (%) : Female	4	Jejunum II ABCC3 (MRP3) (Relative values)	0.89
			Absolute Abundance : SLC22A7 (OAT2) (pmol/10^6 hepatocytes)	0			SC lipid viscosity [bottom] (centipose) : Male	75	Jejunum II ABCC4 (MRP4) (Relative values)	1.22
			Abundance : SLC22A7 (OAT2) ET Mean	1			SC lipid viscosity [bottom] CV (%) : Male	0	Jejunum II ABCG2 (BCRP) (Relative values)	1
			Abundance : SLC22A7 (OAT2) ET CV (%)	60			SC lipid viscosity [bottom] (centipose) : Female	75	Jejunum II SLC2A2 (GLUT2) (Relative values)	1
			Abundance : SLC22A7 (OAT2) PT Mean	0			SC lipid viscosity [bottom] CV (%) : Female	0	Jejunum II SLC10A2 (ASBT/IBAT) (Relative values)	4
			Abundance : SLC22A7 (OAT2) PT CV (%)	0			Viable Epidermis thickness (µm) : Male	53.5684	Jejunum II SLC15A1 (PEPT1) (Relative values)	1.06
			Abundance : SLC22A7 (OAT2) IT Mean	0			Viable Epidermis thickness CV (%) : Male	21	Jejunum II SLC16A1 (MCT1) (Relative values)	1
			Abundance : SLC22A7 (OAT2) IT CV (%)	0			Viable Epidermis thickness (µm) : Female	53.5684	Jejunum II SLCO2B1 (OATP2B1) (Relative values)	0.94
			Abundance : SLC22A7 (OAT2) UT Mean	0			Viable Epidermis thickness CV (%) : Female	21	Jejunum II SLCO4C1 (OATP4C1) (Relative values)	1
			Abundance : SLC22A7 (OAT2) UT CV (%)	0			Dermis thickness (µm) : Male	1240	Jejunum II SLC22A1 (OCT1) (Relative values)	0.87
			Absolute Abundance : SLC22A9 (OAT7) (pmol/10^6 hepatocytes)	0			Dermis thickness CV (%) : Male	20	Jejunum II SLC22A3 (OCT3) (Relative values)	1.11
			Abundance : SLC22A9 (OAT7) ET Mean	1			Dermis thickness (µm) : Female	1240	Jejunum II SLC22A4 (OCTN1) (Relative values)	0.63
			Abundance : SLC22A9 (OAT7) ET CV (%)	60			Dermis thickness CV (%) : Female	20	Jejunum II SLC51A/B (OST-α/β) (Relative values)	1.89
			Abundance : SLC22A9 (OAT7) PT Mean	0			Subcutis thickness (mm) : Male	1.91	Jejunum II Apical Influx (Intestine) (Relative values)	1
			Abundance : SLC22A9 (OAT7) PT CV (%)	0			Subcutis thickness CV (%) : Male	55.72	Jejunum II Apical Efflux (Intestine) (Relative values)	1
			Abundance : SLC22A9 (OAT7) IT Mean	0			Subcutis thickness (mm) : Female	1.91	Jejunum II Basolateral Influx (Intestine) (Relative values)	1
			Abundance : SLC22A9 (OAT7) IT CV (%)	0			Subcutis thickness CV (%) : Female	55.72	Jejunum II Basolateral Efflux (Intestine) (Relative values)	1
			Abundance : SLC22A9 (OAT7) UT Mean	0			Muscle thickness (mm) : Male	29.88	Ileum I Blood Flow (Qvilli %)	10.7
			Abundance : SLC22A9 (OAT7) UT CV (%)	0			Muscle thickness CV (%) : Male	61.44	Ileum I Transit Time (% Total)	15.2
			Absolute Abundance : SLC47A1 (MATE1) (pmol/10^6 hepatocytes)	0.18			Muscle thickness (mm) : Female	23.81	Ileum I CYP3A (% Total)	7.94
			Abundance : SLC47A1 (MATE1) ET Mean	1			Muscle thickness CV (%) : Female	14.85	Ileum I S9PPI (% Total)	7.83
			Abundance : SLC47A1 (MATE1) ET CV (%)	31			Dermis regional blood flow scalar : Male	0.5875	Ileum I MPPI/CYP (% Total)	7.94
			Abundance : SLC47A1 (MATE1) PT Mean	0			Dermis regional blood flow scalar CV (%) : Male	0	Ileum I CPPI (% Total)	7.83
			Abundance : SLC47A1 (MATE1) PT CV (%)	0			Dermis regional blood flow scalar : Female	0.5875	Ileum I pH Fasted	6.8
			Abundance : SLC47A1 (MATE1) IT Mean	0			Dermis regional blood flow scalar CV (%) : Female	0	Ileum I CV pH Fasted (%)	10
			Abundance : SLC47A1 (MATE1) IT CV (%)	0			Subcutis regional blood flow scalar : Male	1	Ileum I pH Fed	6.8
			Abundance : SLC47A1 (MATE1) UT Mean	0			Subcutis regional blood flow scalar CV (%) : Male	0	Ileum I CV pH Fed (%)	10
			Abundance : SLC47A1 (MATE1) UT CV (%)	0			Subcutis regional blood flow scalar : Female	1	Ileum I Bicarbonate Buffer Concentration Fasted (mM)	30
			Absolute Abundance : SLC51A/B (OST-α/β) (pmol/10^6 hepatocytes)	0			Subcutis regional blood flow scalar CV (%) : Female	0	Ileum I Bicarbonate Buffer Concentration CV Fasted (%)	30
			Abundance : SLC51A/B (OST-α/β) ET Mean	1			Muscle regional blood flow scalar : Male	1	Ileum I Bicarbonate Buffer Concentration Fed (mM)	30
			Abundance : SLC51A/B (OST-α/β) ET CV (%)	60			Muscle regional blood flow scalar CV (%) : Male	0	Ileum I Bicarbonate Buffer Concentration CV Fed (%)	30
			Abundance : SLC51A/B (OST-α/β) PT Mean	0			Muscle regional blood flow scalar : Female	1	Ileum I Luminal Fluid Velocity Fasted (m/s)	0.0013
			Abundance : SLC51A/B (OST-α/β) PT CV (%)	0			Muscle regional blood flow scalar CV (%) : Female	0	Ileum I Luminal Fluid Velocity CV Fasted (%)	56
			Abundance : SLC51A/B (OST-α/β) IT Mean	0					Ileum I Luminal Fluid Velocity Fed (m/s)	0.0013
			Abundance : SLC51A/B (OST-α/β) IT CV (%)	0			MPMLA - Upper Arm		Ileum I Luminal Fluid Velocity CV Fed (%)	56
			Abundance : SLC51A/B (OST-α/β) UT Mean	0			Skin surface pH : Male	5.5	Ileum I Fluid Viscosity Fasted (cP)	3
			Abundance : SLC51A/B (OST-α/β) UT CV (%)	0			Skin surface pH CV (%) : Male	11.1	Ileum I Fluid Viscosity CV Fasted (%)	71
			Absolute Abundance : Sinusoidal Uptake (Liver) (pmol/10^6 hepatocytes)	0			Skin surface pH : Female	5.5	Ileum I Fluid Viscosity Fed (cP)	9
			Abundance : Sinusoidal Uptake (Liver) ET Mean	1			Skin surface pH CV (%) : Female	11.1	Ileum I Fluid Viscosity CV Fed (%)	2
			Abundance : Sinusoidal Uptake (Liver) ET CV (%)	0			Skin temperature (°C) : Male	32	Ileum I CMC fasted (mM)	1
			Abundance : Sinusoidal Uptake (Liver) PT Mean	0			Skin temperature CV (%) : Male	0	Ileum I CMC fed (mM)	1
			Abundance : Sinusoidal Uptake (Liver) PT CV (%)	0			Skin temperature (°C) : Female	32	Ileum I Bile fasted (mM)	1.25
			Abundance : Sinusoidal Uptake (Liver) IT Mean	0			Skin temperature CV (%) : Female	0	Ileum I Bile fasted CV (%)	30
			Abundance : Sinusoidal Uptake (Liver) IT CV (%)	0			Shape of corneocyte : Male	Cuboid (brick)	Ileum I Bile fed (mM)	5.86
			Abundance : Sinusoidal Uptake (Liver) UT Mean	0			Shape of corneocyte : Female	Cuboid (brick)	Ileum I Bile fed CV (%)	84
			Abundance : Sinusoidal Uptake (Liver) UT CV (%)	0			Number of SC layers : Male	18	Ileum I Channel Depth Mean (µm)	289.94
			Absolute Abundance : Sinusoidal Efflux (Liver) (pmol/10^6 hepatocytes)	0			Number of SC layers CV (%) : Male	21.6	Ileum I Channel Depth CV (%)	49.37
			Abundance : Sinusoidal Efflux (Liver) ET Mean	1			Number of SC layers : Female	18	Ileum I Channel Width Mean (µm)	56.19
			Abundance : Sinusoidal Efflux (Liver) ET CV (%)	0			Number of SC layers CV (%) : Female	21.6	Ileum I Channel Width CV (%)	30
			Abundance : Sinusoidal Efflux (Liver) PT Mean	0			Water density (gm/cm3) : Male	1	Ileum I Mean Thickness Mean (µm)	127
			Abundance : Sinusoidal Efflux (Liver) PT CV (%)	0			Water density CV (%) : Male	0	Ileum I Mean Thickness CV (%)	30
			Abundance : Sinusoidal Efflux (Liver) IT Mean	0			Water density (gm/cm3) : Female	1	Ileum I Fold Expansion Mean	1.1
			Abundance : Sinusoidal Efflux (Liver) IT CV (%)	0			Water density CV (%) : Female	0	Ileum I Fold Expansion CV (%)	9.15
			Abundance : Sinusoidal Efflux (Liver) UT Mean	0			SC lipids density (gm/cm3) : Male	0.9	Ileum I Pore Radius Mean	8.6
			Abundance : Sinusoidal Efflux (Liver) UT CV (%)	0			SC lipids density CV (%) : Male	0	Ileum I Pore Radius CV (%)	0
			Absolute Abundance : Canalicular Efflux (Liver) (pmol/10^6 hepatocytes)	0			SC lipids density (gm/cm3) : Female	0.9	Ileum I Unstirred Layer Thickness Mean (µm)	480
			Abundance : Canalicular Efflux (Liver) ET Mean	1			SC lipids density CV (%) : Female	0	Ileum I Unstirred Layer Thickness CV (%)	10
			Abundance : Canalicular Efflux (Liver) ET CV (%)	0			SC proteins density (gm/cm3) : Male	1.37	Ileum I Unstirred Layer pH	6.5
			Abundance : Canalicular Efflux (Liver) PT Mean	0			SC proteins density CV (%) : Male	0	Ileum I Unstirred Layer CV (%)	0.5
			Abundance : Canalicular Efflux (Liver) PT CV (%)	0			SC proteins density (gm/cm3) : Female	1.37	Ileum I ABCB1 (P-gp/MDR1) (Relative values)	1.5
			Abundance : Canalicular Efflux (Liver) IT Mean	0			SC proteins density CV (%) : Female	0	Ileum I ABCC1 (MRP1) (Relative values)	0.86
			Abundance : Canalicular Efflux (Liver) IT CV (%)	0			Intercellular lipid thickness of SC (µm) : Male	0.091	Ileum I ABCC2 (MRP2) (Relative values)	0.6
			Abundance : Canalicular Efflux (Liver) UT Mean	0			Intercellular lipid thickness of SC CV (%) : Male	0	Ileum I ABCC3 (MRP3) (Relative values)	1.54
			Abundance : Canalicular Efflux (Liver) UT CV (%)	0			Intercellular lipid thickness of SC (µm) : Female	0.091	Ileum I ABCC4 (MRP4) (Relative values)	1.71
							Intercellular lipid thickness of SC CV (%) : Female	0	Ileum I ABCG2 (BCRP) (Relative values)	0.59
							Tortuosity of lipid diffusion pathway of SC : Male	12.7	Ileum I SLC2A2 (GLUT2) (Relative values)	1
							Tortuosity of lipid diffusion pathway of SC CV (%) : Male	18	Ileum I SLC10A2 (ASBT/IBAT) (Relative values)	98.44
							Tortuosity of lipid diffusion pathway of SC : Female	12.7	Ileum I SLC15A1 (PEPT1) (Relative values)	1.23
							Tortuosity of lipid diffusion pathway of SC CV (%) : Female	18	Ileum I SLC16A1 (MCT1) (Relative values)	1.29
							Hair follicle diameter (µm) : Male	88.8	Ileum I SLCO2B1 (OATP2B1) (Relative values)	1.28
							Hair follicle diameter CV (%) : Male	33	Ileum I SLCO4C1 (OATP4C1) (Relative values)	1
							Hair follicle diameter (µm) : Female	88.8	Ileum I SLC22A1 (OCT1) (Relative values)	1.29
							Hair follicle diameter CV (%) : Female	33	Ileum I SLC22A3 (OCT3) (Relative values)	1.08
							Hair follicle density (N/cm2) : Male	32	Ileum I SLC22A4 (OCTN1) (Relative values)	0.78
							Hair follicle density CV (%) : Male	28	Ileum I SLC51A/B (OST-α/β) (Relative values)	1.08
							Hair follicle density (N/cm2) : Female	32	Ileum I Apical Influx (Intestine) (Relative values)	1
							Hair follicle density CV (%) : Female	28	Ileum I Apical Efflux (Intestine) (Relative values)	1
							Hair shaft diameter (µm) : Male	16.8	Ileum I Basolateral Influx (Intestine) (Relative values)	1
							Hair shaft diameter CV (%) : Male	37	Ileum I Basolateral Efflux (Intestine) (Relative values)	1
							Hair shaft diameter (µm) : Female	16.8	Ileum II Blood Flow (Qvilli %)	10.7
							Hair shaft diameter CV (%) : Female	37	Ileum II Transit Time (% Total)	15.2
							Sebum viscosity (centipose) : Male	40	Ileum II CYP3A (% Total)	7.94
							Sebum viscosity CV (%) : Male	0	Ileum II S9PPI (% Total)	7.83
							Sebum viscosity (centipose) : Female	40	Ileum II MPPI/CYP (% Total)	7.94
							Sebum viscosity CV (%) : Female	0	Ileum II CPPI (% Total)	7.83
							Corneocyte pH [top] : Male	6.8	Ileum II pH Fasted	7
							Corneocyte pH [top] CV (%) : Male	0	Ileum II CV pH Fasted (%)	10
							Corneocyte pH [top] : Female	6.8	Ileum II pH Fed	7
							Corneocyte pH [top] CV (%) : Female	0	Ileum II CV pH Fed (%)	10
							Corneocyte thickness [top] (µm) : Male	0.71	Ileum II Bicarbonate Buffer Concentration Fasted (mM)	30
							Corneocyte thickness [top] CV (%) : Male	11	Ileum II Bicarbonate Buffer Concentration CV Fasted (%)	30
							Corneocyte thickness [top] (µm) : Female	0.71	Ileum II Bicarbonate Buffer Concentration Fed (mM)	30
							Corneocyte thickness [top] CV (%) : Female	11	Ileum II Bicarbonate Buffer Concentration CV Fed (%)	30
							Corneocyte width [top] (µm) : Male	33.2	Ileum II Luminal Fluid Velocity Fasted (m/s)	0.0013
							Corneocyte width [top] CV (%) : Male	10.4	Ileum II Luminal Fluid Velocity CV Fasted (%)	56
							Corneocyte width [top] (µm) : Female	33.2	Ileum II Luminal Fluid Velocity Fed (m/s)	0.0013
							Corneocyte width [top] CV (%) : Female	10.4	Ileum II Luminal Fluid Velocity CV Fed (%)	56
							Corneocyte length [top] (µm) : Male	40.4	Ileum II Fluid Viscosity Fasted (cP)	3
							Corneocyte length [top] CV (%) : Male	6.8	Ileum II Fluid Viscosity CV Fasted (%)	71
							Corneocyte length [top] (µm) : Female	40.4	Ileum II Fluid Viscosity Fed (cP)	3
							Corneocyte length [top] CV (%) : Female	6.8	Ileum II Fluid Viscosity CV Fed (%)	71
							Hydration level (% water volume) [top] : Male	33.6	Ileum II CMC fasted (mM)	1
							Hydration level (% water volume) [top] CV (%) : Male	11	Ileum II CMC fed (mM)	1
							Hydration level (% water volume) [top] : Female	33.6	Ileum II Bile fasted (mM)	1.25
							Hydration level (% water volume) [top] CV (%) : Female	11	Ileum II Bile fasted CV (%)	30
							SC lipid viscosity [top] (centipose) : Male	75	Ileum II Bile fed (mM)	8.61
							SC lipid viscosity [top] CV (%) : Male	0	Ileum II Bile fed CV (%)	88
							SC lipid viscosity [top] (centipose) : Female	75	Ileum II Channel Depth Mean (µm)	289.94
							SC lipid viscosity [top] CV (%) : Female	0	Ileum II Channel Depth CV (%)	49.37
							Corneocyte pH [upper mid] : Male	6.8	Ileum II Channel Width Mean (µm)	56.19
							Corneocyte pH [upper mid] CV (%) : Male	0	Ileum II Channel Width CV (%)	30
							Corneocyte pH [upper mid] : Female	6.8	Ileum II Mean Thickness Mean (µm)	127
							Corneocyte pH [upper mid] CV (%) : Female	0	Ileum II Mean Thickness CV (%)	30
							Corneocyte thickness [upper mid] (µm) : Male	0.81	Ileum II Fold Expansion Mean	1.1
							Corneocyte thickness [upper mid] CV (%) : Male	11	Ileum II Fold Expansion CV (%)	9.15
							Corneocyte thickness [upper mid] (µm) : Female	0.81	Ileum II Pore Radius Mean	8.6
							Corneocyte thickness [upper mid] CV (%) : Female	11	Ileum II Pore Radius CV (%)	0
							Corneocyte width [upper mid] (µm) : Male	33.2	Ileum II Unstirred Layer Thickness Mean (µm)	480
							Corneocyte width [upper mid] CV (%) : Male	10.4	Ileum II Unstirred Layer Thickness CV (%)	10
							Corneocyte width [upper mid] (µm) : Female	33.2	Ileum II Unstirred Layer pH	6.5
							Corneocyte width [upper mid] CV (%) : Female	10.4	Ileum II Unstirred Layer CV (%)	0.5
							Corneocyte length [upper mid] (µm) : Male	40.4	Ileum II ABCB1 (P-gp/MDR1) (Relative values)	1.51
							Corneocyte length [upper mid] CV (%) : Male	6.8	Ileum II ABCC1 (MRP1) (Relative values)	0.86
							Corneocyte length [upper mid] (µm) : Female	40.4	Ileum II ABCC2 (MRP2) (Relative values)	0.6
							Corneocyte length [upper mid] CV (%) : Female	6.8	Ileum II ABCC3 (MRP3) (Relative values)	1.54
							Hydration level (% water volume) [upper mid] : Male	44.858	Ileum II ABCC4 (MRP4) (Relative values)	1.71
							Hydration level (% water volume) [upper mid] CV (%) : Male	7	Ileum II ABCG2 (BCRP) (Relative values)	0.59
							Hydration level (% water volume) [upper mid] : Female	44.858	Ileum II SLC2A2 (GLUT2) (Relative values)	1
							Hydration level (% water volume) [upper mid] CV (%) : Female	7	Ileum II SLC10A2 (ASBT/IBAT) (Relative values)	98.44
							SC lipid viscosity [upper mid] (centipose) : Male	75	Ileum II SLC15A1 (PEPT1) (Relative values)	1.23
							SC lipid viscosity [upper mid] CV (%) : Male	0	Ileum II SLC16A1 (MCT1) (Relative values)	1.29
							SC lipid viscosity [upper mid] (centipose) : Female	75	Ileum II SLCO2B1 (OATP2B1) (Relative values)	1.28
							SC lipid viscosity [upper mid] CV (%) : Female	0	Ileum II SLCO4C1 (OATP4C1) (Relative values)	1
							Corneocyte pH [lower mid] : Male	6.8	Ileum II SLC22A1 (OCT1) (Relative values)	1.29
							Corneocyte pH [lower mid] CV (%) : Male	0	Ileum II SLC22A3 (OCT3) (Relative values)	1.08
							Corneocyte pH [lower mid] : Female	6.8	Ileum II SLC22A4 (OCTN1) (Relative values)	0.78
							Corneocyte pH [lower mid] CV (%) : Female	0	Ileum II SLC51A/B (OST-α/β) (Relative values)	1.08
							Corneocyte thickness [lower mid] (µm) : Male	0.93	Ileum II Apical Influx (Intestine) (Relative values)	1
							Corneocyte thickness [lower mid] CV (%) : Male	11	Ileum II Apical Efflux (Intestine) (Relative values)	1
							Corneocyte thickness [lower mid] (µm) : Female	0.93	Ileum II Basolateral Influx (Intestine) (Relative values)	1
							Corneocyte thickness [lower mid] CV (%) : Female	11	Ileum II Basolateral Efflux (Intestine) (Relative values)	1
							Corneocyte width [lower mid] (µm) : Male	33.2	Ileum III Blood Flow (Qvilli %)	10.7
							Corneocyte width [lower mid] CV (%) : Male	10.4	Ileum III Transit Time (% Total)	15.2
							Corneocyte width [lower mid] (µm) : Female	33.2	Ileum III CYP3A (% Total)	7.94
							Corneocyte width [lower mid] CV (%) : Female	10.4	Ileum III S9PPI (% Total)	7.83
							Corneocyte length [lower mid] (µm) : Male	40.4	Ileum III MPPI/CYP (% Total)	7.94
							Corneocyte length [lower mid] CV (%) : Male	6.8	Ileum III CPPI (% Total)	7.83
							Corneocyte length [lower mid] (µm) : Female	40.4	Ileum III pH Fasted	7.1
							Corneocyte length [lower mid] CV (%) : Female	6.8	Ileum III CV pH Fasted (%)	7
							Hydration level (% water volume) [lower mid] : Male	56.0703	Ileum III pH Fed	7.1
							Hydration level (% water volume) [lower mid] CV (%) : Male	5	Ileum III CV pH Fed (%)	7
							Hydration level (% water volume) [lower mid] : Female	56.0703	Ileum III Bicarbonate Buffer Concentration Fasted (mM)	30
							Hydration level (% water volume) [lower mid] CV (%) : Female	5	Ileum III Bicarbonate Buffer Concentration CV Fasted (%)	30
							SC lipid viscosity [lower mid] (centipose) : Male	75	Ileum III Bicarbonate Buffer Concentration Fed (mM)	30
							SC lipid viscosity [lower mid] CV (%) : Male	0	Ileum III Bicarbonate Buffer Concentration CV Fed (%)	30
							SC lipid viscosity [lower mid] (centipose) : Female	75	Ileum III Luminal Fluid Velocity Fasted (m/s)	0.0013
							SC lipid viscosity [lower mid] CV (%) : Female	0	Ileum III Luminal Fluid Velocity CV Fasted (%)	56
							Corneocyte pH [bottom] : Male	6.8	Ileum III Luminal Fluid Velocity Fed (m/s)	0.0013
							Corneocyte pH [bottom] CV (%) : Male	0	Ileum III Luminal Fluid Velocity CV Fed (%)	56
							Corneocyte pH [bottom] : Female	6.8	Ileum III Fluid Viscosity Fasted (cP)	3
							Corneocyte pH [bottom] CV (%) : Female	0	Ileum III Fluid Viscosity CV Fasted (%)	71
							Corneocyte thickness [bottom] (µm) : Male	1.04	Ileum III Fluid Viscosity Fed (cP)	3
							Corneocyte thickness [bottom] CV (%) : Male	11	Ileum III Fluid Viscosity CV Fed (%)	71
							Corneocyte thickness [bottom] (µm) : Female	1.04	Ileum III CMC fasted (mM)	1
							Corneocyte thickness [bottom] CV (%) : Female	11	Ileum III CMC fed (mM)	1
							Corneocyte width [bottom] (µm) : Male	33.2	Ileum III Bile fasted (mM)	1.25
							Corneocyte width [bottom] CV (%) : Male	10.4	Ileum III Bile fasted CV (%)	30
							Corneocyte width [bottom] (µm) : Female	33.2	Ileum III Bile fed (mM)	8.06
							Corneocyte width [bottom] CV (%) : Female	10.4	Ileum III Bile fed CV (%)	65
							Corneocyte length [bottom] (µm) : Male	40.4	Ileum III Channel Depth Mean (µm)	289.94
							Corneocyte length [bottom] CV (%) : Male	6.8	Ileum III Channel Depth CV (%)	49.37
							Corneocyte length [bottom] (µm) : Female	40.4	Ileum III Channel Width Mean (µm)	56.19
							Corneocyte length [bottom] CV (%) : Female	6.8	Ileum III Channel Width CV (%)	30
							Hydration level (% water volume) [bottom] : Male	67.3	Ileum III Mean Thickness Mean (µm)	127
							Hydration level (% water volume) [bottom] CV (%) : Male	4	Ileum III Mean Thickness CV (%)	30
							Hydration level (% water volume) [bottom] : Female	67.3	Ileum III Fold Expansion Mean	1.08
							Hydration level (% water volume) [bottom] CV (%) : Female	4	Ileum III Fold Expansion CV (%)	16.07
							SC lipid viscosity [bottom] (centipose) : Male	75	Ileum III Pore Radius Mean	8.6
							SC lipid viscosity [bottom] CV (%) : Male	0	Ileum III Pore Radius CV (%)	0
							SC lipid viscosity [bottom] (centipose) : Female	75	Ileum III Unstirred Layer Thickness Mean (µm)	480
							SC lipid viscosity [bottom] CV (%) : Female	0	Ileum III Unstirred Layer Thickness CV (%)	10
							Viable Epidermis thickness (µm) : Male	51.8	Ileum III Unstirred Layer pH	6.5
							Viable Epidermis thickness CV (%) : Male	15	Ileum III Unstirred Layer CV (%)	0.5
							Viable Epidermis thickness (µm) : Female	51.8	Ileum III ABCB1 (P-gp/MDR1) (Relative values)	1.52
							Viable Epidermis thickness CV (%) : Female	15	Ileum III ABCC1 (MRP1) (Relative values)	0.89
							Dermis thickness (µm) : Male	1540	Ileum III ABCC2 (MRP2) (Relative values)	0.6
							Dermis thickness CV (%) : Male	29	Ileum III ABCC3 (MRP3) (Relative values)	1.6
							Dermis thickness (µm) : Female	1540	Ileum III ABCC4 (MRP4) (Relative values)	1.2
							Dermis thickness CV (%) : Female	29	Ileum III ABCG2 (BCRP) (Relative values)	0.59
							Subcutis thickness (mm) : Male	8.41	Ileum III SLC2A2 (GLUT2) (Relative values)	1
							Subcutis thickness CV (%) : Male	39.61	Ileum III SLC10A2 (ASBT/IBAT) (Relative values)	109.18
							Subcutis thickness (mm) : Female	9.64	Ileum III SLC15A1 (PEPT1) (Relative values)	1.24
							Subcutis thickness CV (%) : Female	56.2	Ileum III SLC16A1 (MCT1) (Relative values)	1.29
							Muscle thickness (mm) : Male	28.92	Ileum III SLCO2B1 (OATP2B1) (Relative values)	1.28
							Muscle thickness CV (%) : Male	15.09	Ileum III SLCO4C1 (OATP4C1) (Relative values)	1
							Muscle thickness (mm) : Female	22.79	Ileum III SLC22A1 (OCT1) (Relative values)	1.3
							Muscle thickness CV (%) : Female	28.92	Ileum III SLC22A3 (OCT3) (Relative values)	1.23
							Dermis regional blood flow scalar : Male	1.2869	Ileum III SLC22A4 (OCTN1) (Relative values)	0.8
							Dermis regional blood flow scalar CV (%) : Male	0	Ileum III SLC51A/B (OST-α/β) (Relative values)	0.93
							Dermis regional blood flow scalar : Female	1.2869	Ileum III Apical Influx (Intestine) (Relative values)	1
							Dermis regional blood flow scalar CV (%) : Female	0	Ileum III Apical Efflux (Intestine) (Relative values)	1
							Subcutis regional blood flow scalar : Male	1	Ileum III Basolateral Influx (Intestine) (Relative values)	1
							Subcutis regional blood flow scalar CV (%) : Male	0	Ileum III Basolateral Efflux (Intestine) (Relative values)	1
							Subcutis regional blood flow scalar : Female	1	Ileum IV Blood Flow (Qvilli %)	10.7
							Subcutis regional blood flow scalar CV (%) : Female	0	Ileum IV Transit Time (% Total)	15.2
							Muscle regional blood flow scalar : Male	1	Ileum IV CYP3A (% Total)	7.94
							Muscle regional blood flow scalar CV (%) : Male	0	Ileum IV S9PPI (% Total)	7.83
							Muscle regional blood flow scalar : Female	1	Ileum IV MPPI/CYP (% Total)	7.94
							Muscle regional blood flow scalar CV (%) : Female	0	Ileum IV CPPI (% Total)	7.83
									Ileum IV pH Fasted	7.3
							MPMLA - Face (cheek)		Ileum IV CV pH Fasted (%)	6
							Skin surface pH : Male	5	Ileum IV pH Fed	7.3
							Skin surface pH CV (%) : Male	5.2	Ileum IV CV pH Fed (%)	6
							Skin surface pH : Female	5	Ileum IV Bicarbonate Buffer Concentration Fasted (mM)	30
							Skin surface pH CV (%) : Female	6.1	Ileum IV Bicarbonate Buffer Concentration CV Fasted (%)	30
							Skin temperature (°C) : Male	32	Ileum IV Bicarbonate Buffer Concentration Fed (mM)	30
							Skin temperature CV (%) : Male	0	Ileum IV Bicarbonate Buffer Concentration CV Fed (%)	30
							Skin temperature (°C) : Female	32	Ileum IV Luminal Fluid Velocity Fasted (m/s)	0.0013
							Skin temperature CV (%) : Female	0	Ileum IV Luminal Fluid Velocity CV Fasted (%)	56
							Shape of corneocyte : Male	Cuboid (brick)	Ileum IV Luminal Fluid Velocity Fed (m/s)	0.0013
							Shape of corneocyte : Female	Cuboid (brick)	Ileum IV Luminal Fluid Velocity CV Fed (%)	56
							Number of SC layers : Male	13	Ileum IV Fluid Viscosity Fasted (cP)	3
							Number of SC layers CV (%) : Male	22.7	Ileum IV Fluid Viscosity CV Fasted (%)	71
							Number of SC layers : Female	13	Ileum IV Fluid Viscosity Fed (cP)	3
							Number of SC layers CV (%) : Female	22.7	Ileum IV Fluid Viscosity CV Fed (%)	71
							Water density (gm/cm3) : Male	1	Ileum IV CMC fasted (mM)	1
							Water density CV (%) : Male	0	Ileum IV CMC fed (mM)	1
							Water density (gm/cm3) : Female	1	Ileum IV Bile fasted (mM)	1.25
							Water density CV (%) : Female	0	Ileum IV Bile fasted CV (%)	30
							SC lipids density (gm/cm3) : Male	0.9	Ileum IV Bile fed (mM)	5.96
							SC lipids density CV (%) : Male	0	Ileum IV Bile fed CV (%)	65
							SC lipids density (gm/cm3) : Female	0.9	Ileum IV Channel Depth Mean (µm)	289.94
							SC lipids density CV (%) : Female	0	Ileum IV Channel Depth CV (%)	49.37
							SC proteins density (gm/cm3) : Male	1.37	Ileum IV Channel Width Mean (µm)	56.19
							SC proteins density CV (%) : Male	0	Ileum IV Channel Width CV (%)	30
							SC proteins density (gm/cm3) : Female	1.37	Ileum IV Mean Thickness Mean (µm)	127
							SC proteins density CV (%) : Female	0	Ileum IV Mean Thickness CV (%)	30
							Intercellular lipid thickness of SC (µm) : Male	0.091	Ileum IV Fold Expansion Mean	1.04
							Intercellular lipid thickness of SC CV (%) : Male	0	Ileum IV Fold Expansion CV (%)	12.4
							Intercellular lipid thickness of SC (µm) : Female	0.091	Ileum IV Pore Radius Mean	8.6
							Intercellular lipid thickness of SC CV (%) : Female	0	Ileum IV Pore Radius CV (%)	0
							Tortuosity of lipid diffusion pathway of SC : Male	12.7	Ileum IV Unstirred Layer Thickness Mean (µm)	480
							Tortuosity of lipid diffusion pathway of SC CV (%) : Male	18	Ileum IV Unstirred Layer Thickness CV (%)	10
							Tortuosity of lipid diffusion pathway of SC : Female	12.7	Ileum IV Unstirred Layer pH	6.5
							Tortuosity of lipid diffusion pathway of SC CV (%) : Female	18	Ileum IV Unstirred Layer CV (%)	0.5
							Hair follicle diameter (µm) : Male	65.4	Ileum IV ABCB1 (P-gp/MDR1) (Relative values)	1.51
							Hair follicle diameter CV (%) : Male	83	Ileum IV ABCC1 (MRP1) (Relative values)	0.89
							Hair follicle diameter (µm) : Female	65.4	Ileum IV ABCC2 (MRP2) (Relative values)	0.6
							Hair follicle diameter CV (%) : Female	83	Ileum IV ABCC3 (MRP3) (Relative values)	1.6
							Hair follicle density (N/cm2) : Male	292	Ileum IV ABCC4 (MRP4) (Relative values)	1.2
							Hair follicle density CV (%) : Male	16	Ileum IV ABCG2 (BCRP) (Relative values)	0.59
							Hair follicle density (N/cm2) : Female	292	Ileum IV SLC2A2 (GLUT2) (Relative values)	1
							Hair follicle density CV (%) : Female	16	Ileum IV SLC10A2 (ASBT/IBAT) (Relative values)	108
							Hair shaft diameter (µm) : Male	15.9	Ileum IV SLC15A1 (PEPT1) (Relative values)	1.24
							Hair shaft diameter CV (%) : Male	57	Ileum IV SLC16A1 (MCT1) (Relative values)	1.29
							Hair shaft diameter (µm) : Female	15.9	Ileum IV SLCO2B1 (OATP2B1) (Relative values)	1.28
							Hair shaft diameter CV (%) : Female	57	Ileum IV SLCO4C1 (OATP4C1) (Relative values)	1
							Sebum viscosity (centipose) : Male	40	Ileum IV SLC22A1 (OCT1) (Relative values)	1.3
							Sebum viscosity CV (%) : Male	0	Ileum IV SLC22A3 (OCT3) (Relative values)	1.23
							Sebum viscosity (centipose) : Female	40	Ileum IV SLC22A4 (OCTN1) (Relative values)	0.8
							Sebum viscosity CV (%) : Female	0	Ileum IV SLC51A/B (OST-α/β) (Relative values)	0.93
							Corneocyte pH [top] : Male	6.8	Ileum IV Apical Influx (Intestine) (Relative values)	1
							Corneocyte pH [top] CV (%) : Male	0	Ileum IV Apical Efflux (Intestine) (Relative values)	1
							Corneocyte pH [top] : Female	6.8	Ileum IV Basolateral Influx (Intestine) (Relative values)	1
							Corneocyte pH [top] CV (%) : Female	0	Ileum IV Basolateral Efflux (Intestine) (Relative values)	1
							Corneocyte thickness [top] (µm) : Male	0.47	Colon pH Fasted	6.5
							Corneocyte thickness [top] CV (%) : Male	4	Colon CV pH Fasted (%)	15
							Corneocyte thickness [top] (µm) : Female	0.47	Colon pH Fed	6.5
							Corneocyte thickness [top] CV (%) : Female	4	Colon CV pH Fed (%)	15
							Corneocyte width [top] (µm) : Male	27.7	Colon Bicarbonate Buffer Concentration Fasted (mM)	90.87
							Corneocyte width [top] CV (%) : Male	9.2	Colon Bicarbonate Buffer Concentration CV Fasted (%)	30
							Corneocyte width [top] (µm) : Female	27.7	Colon Bicarbonate Buffer Concentration Fed (mM)	44.43
							Corneocyte width [top] CV (%) : Female	9.2	Colon Bicarbonate Buffer Concentration CV Fed (%)	30
							Corneocyte length [top] (µm) : Male	34.2	Colon Luminal Fluid Velocity Fasted (m/s)	0.0013
							Corneocyte length [top] CV (%) : Male	4.1	Colon Luminal Fluid Velocity CV Fasted (%)	56
							Corneocyte length [top] (µm) : Female	34.2	Colon Luminal Fluid Velocity Fed (m/s)	0.0013
							Corneocyte length [top] CV (%) : Female	4.1	Colon Luminal Fluid Velocity CV Fed (%)	56
							Hydration level (% water volume) [top] : Male	35.5	Colon Fluid Viscosity Fasted (cP)	3
							Hydration level (% water volume) [top] CV (%) : Male	17	Colon Fluid Viscosity CV Fasted (%)	71
							Hydration level (% water volume) [top] : Female	35.5	Colon Fluid Viscosity Fed (cP)	3
							Hydration level (% water volume) [top] CV (%) : Female	17	Colon Fluid Viscosity CV Fed (%)	71
							SC lipid viscosity [top] (centipose) : Male	75	Colon CMC fasted (mM)	1
							SC lipid viscosity [top] CV (%) : Male	0	Colon CMC fed (mM)	1
							SC lipid viscosity [top] (centipose) : Female	75	Colon Bile fasted (mM)	0.6
							SC lipid viscosity [top] CV (%) : Female	0	Colon Bile fasted CV (%)	50
							Corneocyte pH [upper mid] : Male	6.8	Colon Bile fed (mM)	0.6
							Corneocyte pH [upper mid] CV (%) : Male	0	Colon Bile fed CV (%)	50
							Corneocyte pH [upper mid] : Female	6.8	Colon Fold Expansion Mean	1
							Corneocyte pH [upper mid] CV (%) : Female	0	Colon Fold Expansion CV (%)	0
							Corneocyte thickness [upper mid] (µm) : Male	0.53	Colon Pore Radius Mean	8.6
							Corneocyte thickness [upper mid] CV (%) : Male	4	Colon Pore Radius CV (%)	0
							Corneocyte thickness [upper mid] (µm) : Female	0.53	Colon Unstirred Layer Thickness Mean (µm)	830
							Corneocyte thickness [upper mid] CV (%) : Female	4	Colon Unstirred Layer Thickness CV (%)	13
							Corneocyte width [upper mid] (µm) : Male	27.7	Colon Unstirred Layer pH	6.5
							Corneocyte width [upper mid] CV (%) : Male	9.2	Colon Unstirred Layer CV (%)	0.5
							Corneocyte width [upper mid] (µm) : Female	27.7	Colon ABCB1 (P-gp/MDR1) (Relative values)	0.57
							Corneocyte width [upper mid] CV (%) : Female	9.2	Colon ABCC1 (MRP1) (Relative values)	0.93
							Corneocyte length [upper mid] (µm) : Male	34.2	Colon ABCC2 (MRP2) (Relative values)	0.02
							Corneocyte length [upper mid] CV (%) : Male	4.1	Colon ABCC3 (MRP3) (Relative values)	5.95
							Corneocyte length [upper mid] (µm) : Female	34.2	Colon ABCC4 (MRP4) (Relative values)	1.76
							Corneocyte length [upper mid] CV (%) : Female	4.1	Colon ABCG2 (BCRP) (Relative values)	0.13
							Hydration level (% water volume) [upper mid] : Male	46.1	Colon SLC2A2 (GLUT2) (Relative values)	1
							Hydration level (% water volume) [upper mid] CV (%) : Male	11	Colon SLC10A2 (ASBT/IBAT) (Relative values)	1.1
							Hydration level (% water volume) [upper mid] : Female	46.1	Colon SLC15A1 (PEPT1) (Relative values)	0.03
							Hydration level (% water volume) [upper mid] CV (%) : Female	11	Colon SLC16A1 (MCT1) (Relative values)	4.72
							SC lipid viscosity [upper mid] (centipose) : Male	75	Colon SLCO2B1 (OATP2B1) (Relative values)	1.06
							SC lipid viscosity [upper mid] CV (%) : Male	0	Colon SLCO4C1 (OATP4C1) (Relative values)	1
							SC lipid viscosity [upper mid] (centipose) : Female	75	Colon SLC22A1 (OCT1) (Relative values)	2.77
							SC lipid viscosity [upper mid] CV (%) : Female	0	Colon SLC22A3 (OCT3) (Relative values)	1.88
							Corneocyte pH [lower mid] : Male	6.8	Colon SLC22A4 (OCTN1) (Relative values)	0.24
							Corneocyte pH [lower mid] CV (%) : Male	0	Colon SLC51A/B (OST-α/β) (Relative values)	0.71
							Corneocyte pH [lower mid] : Female	6.8	Colon Apical Influx (Intestine) (Relative values)	1
							Corneocyte pH [lower mid] CV (%) : Female	0	Colon Apical Efflux (Intestine) (Relative values)	1
							Corneocyte thickness [lower mid] (µm) : Male	0.6	Colon Basolateral Influx (Intestine) (Relative values)	1
							Corneocyte thickness [lower mid] CV (%) : Male	4	Colon Basolateral Efflux (Intestine) (Relative values)	1
							Corneocyte thickness [lower mid] (µm) : Female	0.6	Abundance : ABCB1 (P-gp/MDR1) ET Mean	1
							Corneocyte thickness [lower mid] CV (%) : Female	4	Abundance : ABCB1 (P-gp/MDR1) ET CV (%)	65
							Corneocyte width [lower mid] (µm) : Male	27.7	Abundance : ABCB1 (P-gp/MDR1) PT Mean	0
							Corneocyte width [lower mid] CV (%) : Male	9.2	Abundance : ABCB1 (P-gp/MDR1) PT CV (%)	0
							Corneocyte width [lower mid] (µm) : Female	27.7	Abundance : ABCB1 (P-gp/MDR1) IT Mean	0
							Corneocyte width [lower mid] CV (%) : Female	9.2	Abundance : ABCB1 (P-gp/MDR1) IT CV (%)	0
							Corneocyte length [lower mid] (µm) : Male	34.2	Abundance : ABCB1 (P-gp/MDR1) UT Mean	0
							Corneocyte length [lower mid] CV (%) : Male	4.1	Abundance : ABCB1 (P-gp/MDR1) UT CV (%)	0
							Corneocyte length [lower mid] (µm) : Female	34.2	Abundance : ABCC1 (MRP1) ET Mean	1
							Corneocyte length [lower mid] CV (%) : Female	4.1	Abundance : ABCC1 (MRP1) ET CV (%)	88
							Hydration level (% water volume) [lower mid] : Male	56.75	Abundance : ABCC1 (MRP1) PT Mean	0
							Hydration level (% water volume) [lower mid] CV (%) : Male	7	Abundance : ABCC1 (MRP1) PT CV (%)	0
							Hydration level (% water volume) [lower mid] : Female	56.75	Abundance : ABCC1 (MRP1) IT Mean	0
							Hydration level (% water volume) [lower mid] CV (%) : Female	7	Abundance : ABCC1 (MRP1) IT CV (%)	0
							SC lipid viscosity [lower mid] (centipose) : Male	75	Abundance : ABCC1 (MRP1) UT Mean	0
							SC lipid viscosity [lower mid] CV (%) : Male	0	Abundance : ABCC1 (MRP1) UT CV (%)	0
							SC lipid viscosity [lower mid] (centipose) : Female	75	Abundance : ABCC2 (MRP2) ET Mean	1
							SC lipid viscosity [lower mid] CV (%) : Female	0	Abundance : ABCC2 (MRP2) ET CV (%)	79
							Corneocyte pH [bottom] : Male	6.8	Abundance : ABCC2 (MRP2) PT Mean	0
							Corneocyte pH [bottom] CV (%) : Male	0	Abundance : ABCC2 (MRP2) PT CV (%)	0
							Corneocyte pH [bottom] : Female	6.8	Abundance : ABCC2 (MRP2) IT Mean	0
							Corneocyte pH [bottom] CV (%) : Female	0	Abundance : ABCC2 (MRP2) IT CV (%)	0
							Corneocyte thickness [bottom] (µm) : Male	0.68	Abundance : ABCC2 (MRP2) UT Mean	0
							Corneocyte thickness [bottom] CV (%) : Male	4	Abundance : ABCC2 (MRP2) UT CV (%)	0
							Corneocyte thickness [bottom] (µm) : Female	0.68	Abundance : ABCC3 (MRP3) ET Mean	1
							Corneocyte thickness [bottom] CV (%) : Female	4	Abundance : ABCC3 (MRP3) ET CV (%)	64
							Corneocyte width [bottom] (µm) : Male	27.7	Abundance : ABCC3 (MRP3) PT Mean	0
							Corneocyte width [bottom] CV (%) : Male	9.2	Abundance : ABCC3 (MRP3) PT CV (%)	0
							Corneocyte width [bottom] (µm) : Female	27.7	Abundance : ABCC3 (MRP3) IT Mean	0
							Corneocyte width [bottom] CV (%) : Female	9.2	Abundance : ABCC3 (MRP3) IT CV (%)	0
							Corneocyte length [bottom] (µm) : Male	34.2	Abundance : ABCC3 (MRP3) UT Mean	0
							Corneocyte length [bottom] CV (%) : Male	4.1	Abundance : ABCC3 (MRP3) UT CV (%)	0
							Corneocyte length [bottom] (µm) : Female	34.2	Abundance : ABCC4 (MRP4) ET Mean	1
							Corneocyte length [bottom] CV (%) : Female	4.1	Abundance : ABCC4 (MRP4) ET CV (%)	106
							Hydration level (% water volume) [bottom] : Male	67.4	Abundance : ABCC4 (MRP4) PT Mean	0
							Hydration level (% water volume) [bottom] CV (%) : Male	4	Abundance : ABCC4 (MRP4) PT CV (%)	0
							Hydration level (% water volume) [bottom] : Female	67.4	Abundance : ABCC4 (MRP4) IT Mean	0
							Hydration level (% water volume) [bottom] CV (%) : Female	4	Abundance : ABCC4 (MRP4) IT CV (%)	0
							SC lipid viscosity [bottom] (centipose) : Male	75	Abundance : ABCC4 (MRP4) UT Mean	0
							SC lipid viscosity [bottom] CV (%) : Male	0	Abundance : ABCC4 (MRP4) UT CV (%)	0
							SC lipid viscosity [bottom] (centipose) : Female	75	Abundance : ABCG2 (BCRP) ET Mean	1
							SC lipid viscosity [bottom] CV (%) : Female	0	Abundance : ABCG2 (BCRP) ET CV (%)	63
							Viable Epidermis thickness (µm) : Male	46.8667	Abundance : ABCG2 (BCRP) PT Mean	0
							Viable Epidermis thickness CV (%) : Male	24	Abundance : ABCG2 (BCRP) PT CV (%)	0
							Viable Epidermis thickness (µm) : Female	46.8667	Abundance : ABCG2 (BCRP) IT Mean	0
							Viable Epidermis thickness CV (%) : Female	24	Abundance : ABCG2 (BCRP) IT CV (%)	0
							Dermis thickness (µm) : Male	1580	Abundance : ABCG2 (BCRP) UT Mean	0
							Dermis thickness CV (%) : Male	20	Abundance : ABCG2 (BCRP) UT CV (%)	0
							Dermis thickness (µm) : Female	1580	Abundance : SLC2A2 (GLUT2) ET Mean	1
							Dermis thickness CV (%) : Female	20	Abundance : SLC2A2 (GLUT2) ET CV (%)	31
							Subcutis thickness (mm) : Male	1.9	Abundance : SLC2A2 (GLUT2) PT Mean	0
							Subcutis thickness CV (%) : Male	55.72	Abundance : SLC2A2 (GLUT2) PT CV (%)	0
							Subcutis thickness (mm) : Female	1.91	Abundance : SLC2A2 (GLUT2) IT Mean	0
							Subcutis thickness CV (%) : Female	55.72	Abundance : SLC2A2 (GLUT2) IT CV (%)	0
							Muscle thickness (mm) : Male	13.2	Abundance : SLC2A2 (GLUT2) UT Mean	0
							Muscle thickness CV (%) : Male	18	Abundance : SLC2A2 (GLUT2) UT CV (%)	0
							Muscle thickness (mm) : Female	12.6	Abundance : SLC10A2 (ASBT/IBAT) ET Mean	1
							Muscle thickness CV (%) : Female	9.9	Abundance : SLC10A2 (ASBT/IBAT) ET CV (%)	43
							Dermis regional blood flow scalar : Male	2.12619	Abundance : SLC10A2 (ASBT/IBAT) PT Mean	0
							Dermis regional blood flow scalar CV (%) : Male	0	Abundance : SLC10A2 (ASBT/IBAT) PT CV (%)	0
							Dermis regional blood flow scalar : Female	2.12619	Abundance : SLC10A2 (ASBT/IBAT) IT Mean	0
							Dermis regional blood flow scalar CV (%) : Female	0	Abundance : SLC10A2 (ASBT/IBAT) IT CV (%)	0
							Subcutis regional blood flow scalar : Male	1	Abundance : SLC10A2 (ASBT/IBAT) UT Mean	0
							Subcutis regional blood flow scalar CV (%) : Male	0	Abundance : SLC10A2 (ASBT/IBAT) UT CV (%)	0
							Subcutis regional blood flow scalar : Female	1	Abundance : SLC15A1 (PEPT1) ET Mean	1
							Subcutis regional blood flow scalar CV (%) : Female	0	Abundance : SLC15A1 (PEPT1) ET CV (%)	41
							Muscle regional blood flow scalar : Male	1	Abundance : SLC15A1 (PEPT1) PT Mean	0
							Muscle regional blood flow scalar CV (%) : Male	0	Abundance : SLC15A1 (PEPT1) PT CV (%)	0
							Muscle regional blood flow scalar : Female	1	Abundance : SLC15A1 (PEPT1) IT Mean	0
							Muscle regional blood flow scalar CV (%) : Female	0	Abundance : SLC15A1 (PEPT1) IT CV (%)	0
									Abundance : SLC15A1 (PEPT1) UT Mean	0
							MPMLA - Lower Leg		Abundance : SLC15A1 (PEPT1) UT CV (%)	0
							Skin surface pH : Male	5.5	Abundance : SLC16A1 (MCT1) ET Mean	1
							Skin surface pH CV (%) : Male	11	Abundance : SLC16A1 (MCT1) ET CV (%)	75
							Skin surface pH : Female	5.5	Abundance : SLC16A1 (MCT1) PT Mean	0
							Skin surface pH CV (%) : Female	11	Abundance : SLC16A1 (MCT1) PT CV (%)	0
							Skin temperature (°C) : Male	32	Abundance : SLC16A1 (MCT1) IT Mean	0
							Skin temperature CV (%) : Male	0	Abundance : SLC16A1 (MCT1) IT CV (%)	0
							Skin temperature (°C) : Female	32	Abundance : SLC16A1 (MCT1) UT Mean	0
							Skin temperature CV (%) : Female	0	Abundance : SLC16A1 (MCT1) UT CV (%)	0
							Shape of corneocyte : Male	Cuboid (brick)	Abundance : SLCO2B1 (OATP2B1) ET Mean	1
							Shape of corneocyte : Female	Cuboid (brick)	Abundance : SLCO2B1 (OATP2B1) ET CV (%)	74
							Number of SC layers : Male	22	Abundance : SLCO2B1 (OATP2B1) PT Mean	0
							Number of SC layers CV (%) : Male	9.1	Abundance : SLCO2B1 (OATP2B1) PT CV (%)	0
							Number of SC layers : Female	22	Abundance : SLCO2B1 (OATP2B1) IT Mean	0
							Number of SC layers CV (%) : Female	9.1	Abundance : SLCO2B1 (OATP2B1) IT CV (%)	0
							Water density (gm/cm3) : Male	1	Abundance : SLCO2B1 (OATP2B1) UT Mean	0
							Water density CV (%) : Male	0	Abundance : SLCO2B1 (OATP2B1) UT CV (%)	0
							Water density (gm/cm3) : Female	1	Abundance : SLCO4C1 (OATP4C1) ET Mean	1
							Water density CV (%) : Female	0	Abundance : SLCO4C1 (OATP4C1) ET CV (%)	60
							SC lipids density (gm/cm3) : Male	0.9	Abundance : SLCO4C1 (OATP4C1) PT Mean	0
							SC lipids density CV (%) : Male	0	Abundance : SLCO4C1 (OATP4C1) PT CV (%)	0
							SC lipids density (gm/cm3) : Female	0.9	Abundance : SLCO4C1 (OATP4C1) IT Mean	0
							SC lipids density CV (%) : Female	0	Abundance : SLCO4C1 (OATP4C1) IT CV (%)	0
							SC proteins density (gm/cm3) : Male	1.37	Abundance : SLCO4C1 (OATP4C1) UT Mean	0
							SC proteins density CV (%) : Male	0	Abundance : SLCO4C1 (OATP4C1) UT CV (%)	0
							SC proteins density (gm/cm3) : Female	1.37	Abundance : SLC22A1 (OCT1) ET Mean	1
							SC proteins density CV (%) : Female	0	Abundance : SLC22A1 (OCT1) ET CV (%)	49
							Intercellular lipid thickness of SC (µm) : Male	0.091	Abundance : SLC22A1 (OCT1) PT Mean	0
							Intercellular lipid thickness of SC CV (%) : Male	0	Abundance : SLC22A1 (OCT1) PT CV (%)	0
							Intercellular lipid thickness of SC (µm) : Female	0.091	Abundance : SLC22A1 (OCT1) IT Mean	0
							Intercellular lipid thickness of SC CV (%) : Female	0	Abundance : SLC22A1 (OCT1) IT CV (%)	0
							Tortuosity of lipid diffusion pathway of SC : Male	12.7	Abundance : SLC22A1 (OCT1) UT Mean	0
							Tortuosity of lipid diffusion pathway of SC CV (%) : Male	18	Abundance : SLC22A1 (OCT1) UT CV (%)	0
							Tortuosity of lipid diffusion pathway of SC : Female	12.7	Abundance : SLC22A3 (OCT3) ET Mean	1
							Tortuosity of lipid diffusion pathway of SC CV (%) : Female	18	Abundance : SLC22A3 (OCT3) ET CV (%)	74
							Hair follicle diameter (µm) : Male	168.4	Abundance : SLC22A3 (OCT3) PT Mean	0
							Hair follicle diameter CV (%) : Male	26	Abundance : SLC22A3 (OCT3) PT CV (%)	0
							Hair follicle diameter (µm) : Female	168.4	Abundance : SLC22A3 (OCT3) IT Mean	0
							Hair follicle diameter CV (%) : Female	26	Abundance : SLC22A3 (OCT3) IT CV (%)	0
							Hair follicle density (N/cm2) : Male	14	Abundance : SLC22A3 (OCT3) UT Mean	0
							Hair follicle density CV (%) : Male	50	Abundance : SLC22A3 (OCT3) UT CV (%)	0
							Hair follicle density (N/cm2) : Female	14	Abundance : SLC22A4 (OCTN1) ET Mean	1
							Hair follicle density CV (%) : Female	50	Abundance : SLC22A4 (OCTN1) ET CV (%)	106
							Hair shaft diameter (µm) : Male	42.1	Abundance : SLC22A4 (OCTN1) PT Mean	0
							Hair shaft diameter CV (%) : Male	29	Abundance : SLC22A4 (OCTN1) PT CV (%)	0
							Hair shaft diameter (µm) : Female	42.1	Abundance : SLC22A4 (OCTN1) IT Mean	0
							Hair shaft diameter CV (%) : Female	29	Abundance : SLC22A4 (OCTN1) IT CV (%)	0
							Sebum viscosity (centipose) : Male	40	Abundance : SLC22A4 (OCTN1) UT Mean	0
							Sebum viscosity CV (%) : Male	0	Abundance : SLC22A4 (OCTN1) UT CV (%)	0
							Sebum viscosity (centipose) : Female	40	Abundance : SLC51A/B (OST-α/β) ET Mean	1
							Sebum viscosity CV (%) : Female	0	Abundance : SLC51A/B (OST-α/β) ET CV (%)	99
							Corneocyte pH [top] : Male	6.8	Abundance : SLC51A/B (OST-α/β) PT Mean	0
							Corneocyte pH [top] CV (%) : Male	0	Abundance : SLC51A/B (OST-α/β) PT CV (%)	0
							Corneocyte pH [top] : Female	6.8	Abundance : SLC51A/B (OST-α/β) IT Mean	0
							Corneocyte pH [top] CV (%) : Female	0	Abundance : SLC51A/B (OST-α/β) IT CV (%)	0
							Corneocyte thickness [top] (µm) : Male	0.87	Abundance : SLC51A/B (OST-α/β) UT Mean	0
							Corneocyte thickness [top] CV (%) : Male	9	Abundance : SLC51A/B (OST-α/β) UT CV (%)	0
							Corneocyte thickness [top] (µm) : Female	0.87	Abundance : Apical Influx (Intestine) ET Mean	1
							Corneocyte thickness [top] CV (%) : Female	9	Abundance : Apical Influx (Intestine) ET CV (%)	0
							Corneocyte width [top] (µm) : Male	29.6	Abundance : Apical Influx (Intestine) PT Mean	0
							Corneocyte width [top] CV (%) : Male	5.9	Abundance : Apical Influx (Intestine) PT CV (%)	0
							Corneocyte width [top] (µm) : Female	29.6	Abundance : Apical Influx (Intestine) IT Mean	0
							Corneocyte width [top] CV (%) : Female	5.9	Abundance : Apical Influx (Intestine) IT CV (%)	0
							Corneocyte length [top] (µm) : Male	36.4	Abundance : Apical Influx (Intestine) UT Mean	0
							Corneocyte length [top] CV (%) : Male	5.7	Abundance : Apical Influx (Intestine) UT CV (%)	0
							Corneocyte length [top] (µm) : Female	36.4	Abundance : Apical Efflux (Intestine) ET Mean	1
							Corneocyte length [top] CV (%) : Female	5.7	Abundance : Apical Efflux (Intestine) ET CV (%)	0
							Hydration level (% water volume) [top] : Male	33.9	Abundance : Apical Efflux (Intestine) PT Mean	0
							Hydration level (% water volume) [top] CV (%) : Male	9	Abundance : Apical Efflux (Intestine) PT CV (%)	0
							Hydration level (% water volume) [top] : Female	33.9	Abundance : Apical Efflux (Intestine) IT Mean	0
							Hydration level (% water volume) [top] CV (%) : Female	9	Abundance : Apical Efflux (Intestine) IT CV (%)	0
							SC lipid viscosity [top] (centipose) : Male	75	Abundance : Apical Efflux (Intestine) UT Mean	0
							SC lipid viscosity [top] CV (%) : Male	0	Abundance : Apical Efflux (Intestine) UT CV (%)	0
							SC lipid viscosity [top] (centipose) : Female	75	Abundance : Basolateral Influx (Intestine) ET Mean	1
							SC lipid viscosity [top] CV (%) : Female	0	Abundance : Basolateral Influx (Intestine) ET CV (%)	0
							Corneocyte pH [upper mid] : Male	6.8	Abundance : Basolateral Influx (Intestine) PT Mean	0
							Corneocyte pH [upper mid] CV (%) : Male	0	Abundance : Basolateral Influx (Intestine) PT CV (%)	0
							Corneocyte pH [upper mid] : Female	6.8	Abundance : Basolateral Influx (Intestine) IT Mean	0
							Corneocyte pH [upper mid] CV (%) : Female	0	Abundance : Basolateral Influx (Intestine) IT CV (%)	0
							Corneocyte thickness [upper mid] (µm) : Male	0.99	Abundance : Basolateral Influx (Intestine) UT Mean	0
							Corneocyte thickness [upper mid] CV (%) : Male	9	Abundance : Basolateral Influx (Intestine) UT CV (%)	0
							Corneocyte thickness [upper mid] (µm) : Female	0.99	Abundance : Basolateral Efflux (Intestine) ET Mean	1
							Corneocyte thickness [upper mid] CV (%) : Female	9	Abundance : Basolateral Efflux (Intestine) ET CV (%)	0
							Corneocyte width [upper mid] (µm) : Male	29.6	Abundance : Basolateral Efflux (Intestine) PT Mean	0
							Corneocyte width [upper mid] CV (%) : Male	5.9	Abundance : Basolateral Efflux (Intestine) PT CV (%)	0
							Corneocyte width [upper mid] (µm) : Female	29.6	Abundance : Basolateral Efflux (Intestine) IT Mean	0
							Corneocyte width [upper mid] CV (%) : Female	5.9	Abundance : Basolateral Efflux (Intestine) IT CV (%)	0
							Corneocyte length [upper mid] (µm) : Male	36.4	Abundance : Basolateral Efflux (Intestine) UT Mean	0
							Corneocyte length [upper mid] CV (%) : Male	5.7	Abundance : Basolateral Efflux (Intestine) UT CV (%)	0
							Corneocyte length [upper mid] (µm) : Female	36.4	Fasted Mean gastric emptying time (h)	0.4
							Corneocyte length [upper mid] CV (%) : Female	5.7	Fasted CV gastric emptying time (%)	38
							Hydration level (% water volume) [upper mid] : Male	44.6987	Fed Mean gastric emptying time (h)	1
							Hydration level (% water volume) [upper mid] CV (%) : Male	6	Fed CV gastric emptying time (%)	38
							Hydration level (% water volume) [upper mid] : Female	44.6987	Weibull Dist of transit time - alpha	2.92
							Hydration level (% water volume) [upper mid] CV (%) : Female	6	Weibull Dist of transit time - beta	4.04
							SC lipid viscosity [upper mid] (centipose) : Male	75	Mean colon transit time (h)	24
							SC lipid viscosity [upper mid] CV (%) : Male	0	CV colon transit time (%)	30
							SC lipid viscosity [upper mid] (centipose) : Female	75	Initial volume of stomach fluid (mL) - Fed	1000
							SC lipid viscosity [upper mid] CV (%) : Female	0	Initial volume of stomach fluid CV (%) - Fed	30
							Corneocyte pH [lower mid] : Male	6.8	Initial volume of stomach fluid (mL) - Fasted	50
							Corneocyte pH [lower mid] CV (%) : Male	0	Initial volume of stomach fluid CV (%) - Fasted	30
							Corneocyte pH [lower mid] : Female	6.8	Mean SITT (h)	3.33873
							Corneocyte pH [lower mid] CV (%) : Female	0	Ionic Product (Kw) (10-14 mol2/dm6)	2.4
							Corneocyte thickness [lower mid] (µm) : Male	1.13	Aqueous Diffusion Coefficients H+ (10-4 cm2/min)	62.94
							Corneocyte thickness [lower mid] CV (%) : Male	9	Aqueous Diffusion Coefficients OH- (10-4 cm2/min)	37.8
							Corneocyte thickness [lower mid] (µm) : Female	1.13	Water Concentration (mM)	55560
							Corneocyte thickness [lower mid] CV (%) : Female	9	Bicarbonate pKa 1	6.05
							Corneocyte width [lower mid] (µm) : Male	29.6	Bicarbonate pKa 2	9.79
							Corneocyte width [lower mid] CV (%) : Male	5.9	Aqueous Diffusion Coefficients 37oC (10-4 cm2/min) H2CO3	17.72
							Corneocyte width [lower mid] (µm) : Female	29.6	Aqueous Diffusion Coefficients 37oC (10-4 cm2/min) HCO3-	9.85
							Corneocyte width [lower mid] CV (%) : Female	5.9	Aqueous Diffusion Coefficients 37oC (10-4 cm2/min) CO32-	6.98
							Corneocyte length [lower mid] (µm) : Male	36.4	User Defined Intestinal Fluid Volumes?	No
							Corneocyte length [lower mid] CV (%) : Male	5.7	Fasted Jejunum I basal fluid volume (mL)	21.1
							Corneocyte length [lower mid] (µm) : Female	36.4	Fasted Jejunum II basal fluid volume (mL)	21.1
							Corneocyte length [lower mid] CV (%) : Female	5.7	Fasted Ileum I basal fluid volume (mL)	12.6
							Hydration level (% water volume) [lower mid] : Male	55.5388	Fasted Ileum II basal fluid volume (mL)	12.6
							Hydration level (% water volume) [lower mid] CV (%) : Male	5	Fasted Ileum III basal fluid volume (mL)	12.6
							Hydration level (% water volume) [lower mid] : Female	55.5388	Fasted Ileum IV basal fluid volume (mL)	12.6
							Hydration level (% water volume) [lower mid] CV (%) : Female	5	Fasted Jejunum I-Ileum IV basal fluid volume %CV (%)	37
							SC lipid viscosity [lower mid] (centipose) : Male	75	Fasted Colon basal fluid volume (mL)	13
							SC lipid viscosity [lower mid] CV (%) : Male	0	Fasted Colon basal fluid volume %CV (%)	4.4
							SC lipid viscosity [lower mid] (centipose) : Female	75	Fed Jejunum I basal fluid volume (mL)	21.1
							SC lipid viscosity [lower mid] CV (%) : Female	0	Fed Jejunum II basal fluid volume (mL)	21.1
							Corneocyte pH [bottom] : Male	6.8	Fed Ileum I basal fluid volume (mL)	12.6
							Corneocyte pH [bottom] CV (%) : Male	0	Fed Ileum II basal fluid volume (mL)	12.6
							Corneocyte pH [bottom] : Female	6.8	Fed Ileum III basal fluid volume (mL)	12.6
							Corneocyte pH [bottom] CV (%) : Female	0	Fed Ileum IV basal fluid volume (mL)	12.6
							Corneocyte thickness [bottom] (µm) : Male	1.27	Fed Jejunum I-Ileum IV basal fluid volume %CV (%)	37
							Corneocyte thickness [bottom] CV (%) : Male	9	Fed Colon basal fluid volume (mL)	13
							Corneocyte thickness [bottom] (µm) : Female	1.27	Fed Colon basal fluid volume %CV (%)	4.4
							Corneocyte thickness [bottom] CV (%) : Female	9
							Corneocyte width [bottom] (µm) : Male	29.6
							Corneocyte width [bottom] CV (%) : Male	5.9
							Corneocyte width [bottom] (µm) : Female	29.6
							Corneocyte width [bottom] CV (%) : Female	5.9
							Corneocyte length [bottom] (µm) : Male	36.4
							Corneocyte length [bottom] CV (%) : Male	5.7
							Corneocyte length [bottom] (µm) : Female	36.4
							Corneocyte length [bottom] CV (%) : Female	5.7
							Hydration level (% water volume) [bottom] : Male	66.4
							Hydration level (% water volume) [bottom] CV (%) : Male	4
							Hydration level (% water volume) [bottom] : Female	66.4
							Hydration level (% water volume) [bottom] CV (%) : Female	4
							SC lipid viscosity [bottom] (centipose) : Male	75
							SC lipid viscosity [bottom] CV (%) : Male	0
							SC lipid viscosity [bottom] (centipose) : Female	75
							SC lipid viscosity [bottom] CV (%) : Female	0
							Viable Epidermis thickness (µm) : Male	57.36
							Viable Epidermis thickness CV (%) : Male	8
							Viable Epidermis thickness (µm) : Female	57.36
							Viable Epidermis thickness CV (%) : Female	8
							Dermis thickness (µm) : Male	1240
							Dermis thickness CV (%) : Male	20
							Dermis thickness (µm) : Female	1240
							Dermis thickness CV (%) : Female	20
							Subcutis thickness (mm) : Male	9.62
							Subcutis thickness CV (%) : Male	48.31
							Subcutis thickness (mm) : Female	17.07
							Subcutis thickness CV (%) : Female	37.1
							Muscle thickness (mm) : Male	17.7
							Muscle thickness CV (%) : Male	22.67
							Muscle thickness (mm) : Female	18.84
							Muscle thickness CV (%) : Female	18.63
							Dermis regional blood flow scalar : Male	0.839286
							Dermis regional blood flow scalar CV (%) : Male	0
							Dermis regional blood flow scalar : Female	0.839286
							Dermis regional blood flow scalar CV (%) : Female	0
							Subcutis regional blood flow scalar : Male	1
							Subcutis regional blood flow scalar CV (%) : Male	0
							Subcutis regional blood flow scalar : Female	1
							Subcutis regional blood flow scalar CV (%) : Female	0
							Muscle regional blood flow scalar : Male	1
							Muscle regional blood flow scalar CV (%) : Male	0
							Muscle regional blood flow scalar : Female	1
							Muscle regional blood flow scalar CV (%) : Female	0
							MPMLA - Thigh
							Skin surface pH : Male	5.5
							Skin surface pH CV (%) : Male	11
							Skin surface pH : Female	5.5
							Skin surface pH CV (%) : Female	11
							Skin temperature (°C) : Male	32
							Skin temperature CV (%) : Male	0
							Skin temperature (°C) : Female	32
							Skin temperature CV (%) : Female	0
							Shape of corneocyte : Male	Cuboid (brick)
							Shape of corneocyte : Female	Cuboid (brick)
							Number of SC layers : Male	18
							Number of SC layers CV (%) : Male	25.3
							Number of SC layers : Female	21
							Number of SC layers CV (%) : Female	13
							Water density (gm/cm3) : Male	1
							Water density CV (%) : Male	0
							Water density (gm/cm3) : Female	1
							Water density CV (%) : Female	0
							SC lipids density (gm/cm3) : Male	0.9
							SC lipids density CV (%) : Male	0
							SC lipids density (gm/cm3) : Female	0.9
							SC lipids density CV (%) : Female	0
							SC proteins density (gm/cm3) : Male	1.37
							SC proteins density CV (%) : Male	0
							SC proteins density (gm/cm3) : Female	1.37
							SC proteins density CV (%) : Female	0
							Intercellular lipid thickness of SC (µm) : Male	0.091
							Intercellular lipid thickness of SC CV (%) : Male	0
							Intercellular lipid thickness of SC (µm) : Female	0.091
							Intercellular lipid thickness of SC CV (%) : Female	0
							Tortuosity of lipid diffusion pathway of SC : Male	12.7
							Tortuosity of lipid diffusion pathway of SC CV (%) : Male	18
							Tortuosity of lipid diffusion pathway of SC : Female	12.7
							Tortuosity of lipid diffusion pathway of SC CV (%) : Female	18
							Hair follicle diameter (µm) : Male	131.5
							Hair follicle diameter CV (%) : Male	31
							Hair follicle diameter (µm) : Female	131.5
							Hair follicle diameter CV (%) : Female	31
							Hair follicle density (N/cm2) : Male	17
							Hair follicle density CV (%) : Male	24
							Hair follicle density (N/cm2) : Female	17
							Hair follicle density CV (%) : Female	24
							Hair shaft diameter (µm) : Male	29.2
							Hair shaft diameter CV (%) : Male	41
							Hair shaft diameter (µm) : Female	29.2
							Hair shaft diameter CV (%) : Female	41
							Sebum viscosity (centipose) : Male	40
							Sebum viscosity CV (%) : Male	0
							Sebum viscosity (centipose) : Female	40
							Sebum viscosity CV (%) : Female	0
							Corneocyte pH [top] : Male	6.8
							Corneocyte pH [top] CV (%) : Male	0
							Corneocyte pH [top] : Female	6.8
							Corneocyte pH [top] CV (%) : Female	0
							Corneocyte thickness [top] (µm) : Male	0.87
							Corneocyte thickness [top] CV (%) : Male	26
							Corneocyte thickness [top] (µm) : Female	0.87
							Corneocyte thickness [top] CV (%) : Female	26
							Corneocyte width [top] (µm) : Male	34
							Corneocyte width [top] CV (%) : Male	15.1
							Corneocyte width [top] (µm) : Female	34
							Corneocyte width [top] CV (%) : Female	15.1
							Corneocyte length [top] (µm) : Male	40.7
							Corneocyte length [top] CV (%) : Male	14.6
							Corneocyte length [top] (µm) : Female	40.7
							Corneocyte length [top] CV (%) : Female	14.6
							Hydration level (% water volume) [top] : Male	33.9
							Hydration level (% water volume) [top] CV (%) : Male	9
							Hydration level (% water volume) [top] : Female	33.9
							Hydration level (% water volume) [top] CV (%) : Female	9
							SC lipid viscosity [top] (centipose) : Male	75
							SC lipid viscosity [top] CV (%) : Male	0
							SC lipid viscosity [top] (centipose) : Female	75
							SC lipid viscosity [top] CV (%) : Female	0
							Corneocyte pH [upper mid] : Male	6.8
							Corneocyte pH [upper mid] CV (%) : Male	0
							Corneocyte pH [upper mid] : Female	6.8
							Corneocyte pH [upper mid] CV (%) : Female	0
							Corneocyte thickness [upper mid] (µm) : Male	0.75
							Corneocyte thickness [upper mid] CV (%) : Male	26
							Corneocyte thickness [upper mid] (µm) : Female	0.75
							Corneocyte thickness [upper mid] CV (%) : Female	26
							Corneocyte width [upper mid] (µm) : Male	34
							Corneocyte width [upper mid] CV (%) : Male	15.1
							Corneocyte width [upper mid] (µm) : Female	34
							Corneocyte width [upper mid] CV (%) : Female	15.1
							Corneocyte length [upper mid] (µm) : Male	40.7
							Corneocyte length [upper mid] CV (%) : Male	14.6
							Corneocyte length [upper mid] (µm) : Female	40.7
							Corneocyte length [upper mid] CV (%) : Female	14.6
							Hydration level (% water volume) [upper mid] : Male	44.6987
							Hydration level (% water volume) [upper mid] CV (%) : Male	6
							Hydration level (% water volume) [upper mid] : Female	44.6987
							Hydration level (% water volume) [upper mid] CV (%) : Female	6
							SC lipid viscosity [upper mid] (centipose) : Male	75
							SC lipid viscosity [upper mid] CV (%) : Male	0
							SC lipid viscosity [upper mid] (centipose) : Female	75
							SC lipid viscosity [upper mid] CV (%) : Female	0
							Corneocyte pH [lower mid] : Male	6.8
							Corneocyte pH [lower mid] CV (%) : Male	0
							Corneocyte pH [lower mid] : Female	6.8
							Corneocyte pH [lower mid] CV (%) : Female	0
							Corneocyte thickness [lower mid] (µm) : Male	0.85
							Corneocyte thickness [lower mid] CV (%) : Male	26
							Corneocyte thickness [lower mid] (µm) : Female	0.85
							Corneocyte thickness [lower mid] CV (%) : Female	26
							Corneocyte width [lower mid] (µm) : Male	34
							Corneocyte width [lower mid] CV (%) : Male	15.1
							Corneocyte width [lower mid] (µm) : Female	34
							Corneocyte width [lower mid] CV (%) : Female	15.1
							Corneocyte length [lower mid] (µm) : Male	40.7
							Corneocyte length [lower mid] CV (%) : Male	14.6
							Corneocyte length [lower mid] (µm) : Female	40.7
							Corneocyte length [lower mid] CV (%) : Female	14.6
							Hydration level (% water volume) [lower mid] : Male	55.5388
							Hydration level (% water volume) [lower mid] CV (%) : Male	5
							Hydration level (% water volume) [lower mid] : Female	55.5388
							Hydration level (% water volume) [lower mid] CV (%) : Female	5
							SC lipid viscosity [lower mid] (centipose) : Male	75
							SC lipid viscosity [lower mid] CV (%) : Male	0
							SC lipid viscosity [lower mid] (centipose) : Female	75
							SC lipid viscosity [lower mid] CV (%) : Female	0
							Corneocyte pH [bottom] : Male	6.8
							Corneocyte pH [bottom] CV (%) : Male	0
							Corneocyte pH [bottom] : Female	6.8
							Corneocyte pH [bottom] CV (%) : Female	0
							Corneocyte thickness [bottom] (µm) : Male	0.96
							Corneocyte thickness [bottom] CV (%) : Male	26
							Corneocyte thickness [bottom] (µm) : Female	0.96
							Corneocyte thickness [bottom] CV (%) : Female	26
							Corneocyte width [bottom] (µm) : Male	34
							Corneocyte width [bottom] CV (%) : Male	15.1
							Corneocyte width [bottom] (µm) : Female	34
							Corneocyte width [bottom] CV (%) : Female	15.1
							Corneocyte length [bottom] (µm) : Male	40.7
							Corneocyte length [bottom] CV (%) : Male	14.6
							Corneocyte length [bottom] (µm) : Female	40.7
							Corneocyte length [bottom] CV (%) : Female	14.6
							Hydration level (% water volume) [bottom] : Male	66.4
							Hydration level (% water volume) [bottom] CV (%) : Male	4
							Hydration level (% water volume) [bottom] : Female	66.4
							Hydration level (% water volume) [bottom] CV (%) : Female	4
							SC lipid viscosity [bottom] (centipose) : Male	75
							SC lipid viscosity [bottom] CV (%) : Male	0
							SC lipid viscosity [bottom] (centipose) : Female	75
							SC lipid viscosity [bottom] CV (%) : Female	0
							Viable Epidermis thickness (µm) : Male	40
							Viable Epidermis thickness CV (%) : Male	19
							Viable Epidermis thickness (µm) : Female	40
							Viable Epidermis thickness CV (%) : Female	19
							Dermis thickness (µm) : Male	1240
							Dermis thickness CV (%) : Male	20
							Dermis thickness (µm) : Female	1240
							Dermis thickness CV (%) : Female	20
							Subcutis thickness (mm) : Male	9.62
							Subcutis thickness CV (%) : Male	48.31
							Subcutis thickness (mm) : Female	17.07
							Subcutis thickness CV (%) : Female	37.1
							Muscle thickness (mm) : Male	32.81
							Muscle thickness CV (%) : Male	38.03
							Muscle thickness (mm) : Female	26.32
							Muscle thickness CV (%) : Female	42.45
							Dermis regional blood flow scalar : Male	0.839286
							Dermis regional blood flow scalar CV (%) : Male	0
							Dermis regional blood flow scalar : Female	0.839286
							Dermis regional blood flow scalar CV (%) : Female	0
							Subcutis regional blood flow scalar : Male	1
							Subcutis regional blood flow scalar CV (%) : Male	0
							Subcutis regional blood flow scalar : Female	1
							Subcutis regional blood flow scalar CV (%) : Female	0
							Muscle regional blood flow scalar : Male	1
							Muscle regional blood flow scalar CV (%) : Male	0
							Muscle regional blood flow scalar : Female	1
							Muscle regional blood flow scalar CV (%) : Female	0
							MPMLA - Back
							Skin surface pH : Male	5.2
							Skin surface pH CV (%) : Male	8.4
							Skin surface pH : Female	5.2
							Skin surface pH CV (%) : Female	8.4
							Skin temperature (°C) : Male	32
							Skin temperature CV (%) : Male	0
							Skin temperature (°C) : Female	32
							Skin temperature CV (%) : Female	0
							Shape of corneocyte : Male	Cuboid (brick)
							Shape of corneocyte : Female	Cuboid (brick)
							Number of SC layers : Male	17
							Number of SC layers CV (%) : Male	23.7
							Number of SC layers : Female	18
							Number of SC layers CV (%) : Female	22.7
							Water density (gm/cm3) : Male	1
							Water density CV (%) : Male	0
							Water density (gm/cm3) : Female	1
							Water density CV (%) : Female	0
							SC lipids density (gm/cm3) : Male	0.9
							SC lipids density CV (%) : Male	0
							SC lipids density (gm/cm3) : Female	0.9
							SC lipids density CV (%) : Female	0
							SC proteins density (gm/cm3) : Male	1.37
							SC proteins density CV (%) : Male	0
							SC proteins density (gm/cm3) : Female	1.37
							SC proteins density CV (%) : Female	0
							Intercellular lipid thickness of SC (µm) : Male	0.091
							Intercellular lipid thickness of SC CV (%) : Male	0
							Intercellular lipid thickness of SC (µm) : Female	0.091
							Intercellular lipid thickness of SC CV (%) : Female	0
							Tortuosity of lipid diffusion pathway of SC : Male	12.7
							Tortuosity of lipid diffusion pathway of SC CV (%) : Male	18
							Tortuosity of lipid diffusion pathway of SC : Female	12.7
							Tortuosity of lipid diffusion pathway of SC CV (%) : Female	18
							Hair follicle diameter (µm) : Male	105.3
							Hair follicle diameter CV (%) : Male	60
							Hair follicle diameter (µm) : Female	105.3
							Hair follicle diameter CV (%) : Female	60
							Hair follicle density (N/cm2) : Male	29
							Hair follicle density CV (%) : Male	31
							Hair follicle density (N/cm2) : Female	29
							Hair follicle density CV (%) : Female	31
							Hair shaft diameter (µm) : Male	18.2
							Hair shaft diameter CV (%) : Male	37
							Hair shaft diameter (µm) : Female	18.2
							Hair shaft diameter CV (%) : Female	37
							Sebum viscosity (centipose) : Male	40
							Sebum viscosity CV (%) : Male	0
							Sebum viscosity (centipose) : Female	40
							Sebum viscosity CV (%) : Female	0
							Corneocyte pH [top] : Male	6.8
							Corneocyte pH [top] CV (%) : Male	0
							Corneocyte pH [top] : Female	6.8
							Corneocyte pH [top] CV (%) : Female	0
							Corneocyte thickness [top] (µm) : Male	0.59
							Corneocyte thickness [top] CV (%) : Male	30
							Corneocyte thickness [top] (µm) : Female	0.59
							Corneocyte thickness [top] CV (%) : Female	30
							Corneocyte width [top] (µm) : Male	29.6
							Corneocyte width [top] CV (%) : Male	5.9
							Corneocyte width [top] (µm) : Female	29.6
							Corneocyte width [top] CV (%) : Female	5.9
							Corneocyte length [top] (µm) : Male	36.4
							Corneocyte length [top] CV (%) : Male	5.7
							Corneocyte length [top] (µm) : Female	36.4
							Corneocyte length [top] CV (%) : Female	5.7
							Hydration level (% water volume) [top] : Male	33.9
							Hydration level (% water volume) [top] CV (%) : Male	9
							Hydration level (% water volume) [top] : Female	33.9
							Hydration level (% water volume) [top] CV (%) : Female	9
							SC lipid viscosity [top] (centipose) : Male	75
							SC lipid viscosity [top] CV (%) : Male	0
							SC lipid viscosity [top] (centipose) : Female	75
							SC lipid viscosity [top] CV (%) : Female	0
							Corneocyte pH [upper mid] : Male	6.8
							Corneocyte pH [upper mid] CV (%) : Male	0
							Corneocyte pH [upper mid] : Female	6.8
							Corneocyte pH [upper mid] CV (%) : Female	0
							Corneocyte thickness [upper mid] (µm) : Male	0.67
							Corneocyte thickness [upper mid] CV (%) : Male	30
							Corneocyte thickness [upper mid] (µm) : Female	0.67
							Corneocyte thickness [upper mid] CV (%) : Female	30
							Corneocyte width [upper mid] (µm) : Male	29.6
							Corneocyte width [upper mid] CV (%) : Male	5.9
							Corneocyte width [upper mid] (µm) : Female	29.6
							Corneocyte width [upper mid] CV (%) : Female	5.9
							Corneocyte length [upper mid] (µm) : Male	36.4
							Corneocyte length [upper mid] CV (%) : Male	5.7
							Corneocyte length [upper mid] (µm) : Female	36.4
							Corneocyte length [upper mid] CV (%) : Female	5.7
							Hydration level (% water volume) [upper mid] : Male	44.6987
							Hydration level (% water volume) [upper mid] CV (%) : Male	6
							Hydration level (% water volume) [upper mid] : Female	44.6987
							Hydration level (% water volume) [upper mid] CV (%) : Female	6
							SC lipid viscosity [upper mid] (centipose) : Male	75
							SC lipid viscosity [upper mid] CV (%) : Male	0
							SC lipid viscosity [upper mid] (centipose) : Female	75
							SC lipid viscosity [upper mid] CV (%) : Female	0
							Corneocyte pH [lower mid] : Male	6.8
							Corneocyte pH [lower mid] CV (%) : Male	0
							Corneocyte pH [lower mid] : Female	6.8
							Corneocyte pH [lower mid] CV (%) : Female	0
							Corneocyte thickness [lower mid] (µm) : Male	0.76
							Corneocyte thickness [lower mid] CV (%) : Male	30
							Corneocyte thickness [lower mid] (µm) : Female	0.76
							Corneocyte thickness [lower mid] CV (%) : Female	30
							Corneocyte width [lower mid] (µm) : Male	29.6
							Corneocyte width [lower mid] CV (%) : Male	5.9
							Corneocyte width [lower mid] (µm) : Female	29.6
							Corneocyte width [lower mid] CV (%) : Female	5.9
							Corneocyte length [lower mid] (µm) : Male	36.4
							Corneocyte length [lower mid] CV (%) : Male	5.7
							Corneocyte length [lower mid] (µm) : Female	36.4
							Corneocyte length [lower mid] CV (%) : Female	5.7
							Hydration level (% water volume) [lower mid] : Male	55.5388
							Hydration level (% water volume) [lower mid] CV (%) : Male	5
							Hydration level (% water volume) [lower mid] : Female	55.5388
							Hydration level (% water volume) [lower mid] CV (%) : Female	5
							SC lipid viscosity [lower mid] (centipose) : Male	75
							SC lipid viscosity [lower mid] CV (%) : Male	0
							SC lipid viscosity [lower mid] (centipose) : Female	75
							SC lipid viscosity [lower mid] CV (%) : Female	0
							Corneocyte pH [bottom] : Male	6.8
							Corneocyte pH [bottom] CV (%) : Male	0
							Corneocyte pH [bottom] : Female	6.8
							Corneocyte pH [bottom] CV (%) : Female	0
							Corneocyte thickness [bottom] (µm) : Male	0.86
							Corneocyte thickness [bottom] CV (%) : Male	30
							Corneocyte thickness [bottom] (µm) : Female	0.86
							Corneocyte thickness [bottom] CV (%) : Female	30
							Corneocyte width [bottom] (µm) : Male	29.6
							Corneocyte width [bottom] CV (%) : Male	5.9
							Corneocyte width [bottom] (µm) : Female	29.6
							Corneocyte width [bottom] CV (%) : Female	5.9
							Corneocyte length [bottom] (µm) : Male	36.4
							Corneocyte length [bottom] CV (%) : Male	5.7
							Corneocyte length [bottom] (µm) : Female	36.4
							Corneocyte length [bottom] CV (%) : Female	5.7
							Hydration level (% water volume) [bottom] : Male	66.4
							Hydration level (% water volume) [bottom] CV (%) : Male	4
							Hydration level (% water volume) [bottom] : Female	66.4
							Hydration level (% water volume) [bottom] CV (%) : Female	4
							SC lipid viscosity [bottom] (centipose) : Male	75
							SC lipid viscosity [bottom] CV (%) : Male	0
							SC lipid viscosity [bottom] (centipose) : Female	75
							SC lipid viscosity [bottom] CV (%) : Female	0
							Viable Epidermis thickness (µm) : Male	45.655
							Viable Epidermis thickness CV (%) : Male	15
							Viable Epidermis thickness (µm) : Female	45.655
							Viable Epidermis thickness CV (%) : Female	15
							Dermis thickness (µm) : Male	1240
							Dermis thickness CV (%) : Male	20
							Dermis thickness (µm) : Female	1240
							Dermis thickness CV (%) : Female	20
							Subcutis thickness (mm) : Male	6.89
							Subcutis thickness CV (%) : Male	33.55
							Subcutis thickness (mm) : Female	6.89
							Subcutis thickness CV (%) : Female	33.55
							Muscle thickness (mm) : Male	19.3
							Muscle thickness CV (%) : Male	6.22
							Muscle thickness (mm) : Female	19.3
							Muscle thickness CV (%) : Female	6.22
							Dermis regional blood flow scalar : Male	1.03512
							Dermis regional blood flow scalar CV (%) : Male	0
							Dermis regional blood flow scalar : Female	1.03512
							Dermis regional blood flow scalar CV (%) : Female	0
							Subcutis regional blood flow scalar : Male	1
							Subcutis regional blood flow scalar CV (%) : Male	0
							Subcutis regional blood flow scalar : Female	1
							Subcutis regional blood flow scalar CV (%) : Female	0
							Muscle regional blood flow scalar : Male	1
							Muscle regional blood flow scalar CV (%) : Male	0
							Muscle regional blood flow scalar : Female	1
							Muscle regional blood flow scalar CV (%) : Female	0

## Sheet: Custom Dosing - Inh 1
Verapamil Denise Chua Dosing
Dose Number	Day	Time	Offset (h)	Dose	Dose Units	Route of Administration	Calculate AUC
1	1	09:00:00	0	120	mg	Oral	Yes
2	2	09:00:00	24	120	mg	Oral	No
3	2	09:00:00	24	120	mg	Oral	No
4	3	09:00:00	48	120	mg	Oral	No
5	3	09:00:00	48	120	mg	Oral	No
6	3	09:00:00	48	120	mg	Oral	No
7	4	09:00:00	72	120	mg	Oral	No
8	4	09:00:00	72	120	mg	Oral	No
9	4	09:00:00	72	120	mg	Oral	No
10	5	09:00:00	96	120	mg	Oral	No
11	5	09:00:00	96	120	mg	Oral	No
12	5	09:00:00	96	120	mg	Oral	No
13	6	09:00:00	120	120	mg	Oral	No
14	6	09:00:00	120	120	mg	Oral	No
15	6	09:00:00	120	120	mg	Oral	No
16	7	09:00:00	144	120	mg	Oral	No
17	7	09:00:00	144	120	mg	Oral	No
18	7	09:00:00	144	120	mg	Oral	No
19	8	09:00:00	168	120	mg	Oral	No
20	8	09:00:00	168	120	mg	Oral	No
21	8	09:00:00	168	120	mg	Oral	No
22	9	09:00:00	192	120	mg	Oral	No
23	9	09:00:00	192	120	mg	Oral	No
24	9	09:00:00	192	120	mg	Oral	No
25	10	09:00:00	216	120	mg	Oral	No
26	10	09:00:00	216	120	mg	Oral	No
27	10	09:00:00	216	120	mg	Oral	No

## Sheet: Conc Trials Profiles(CPlasma)
Summary Statistics			Mean
	From (h)	To (h)	TMax (h)	CMax (ng/mL)	AUC (ng/mL.h)
Rivaroxaban Denise Chua	168	240	3.60072	271.512	2838.92
Rivaroxaban Denise Chua (Trial 1)	168	240	3.60072	312.73	3166.66
Rivaroxaban Denise Chua (Trial 2)	168	240	3.60072	271.756	2625.48
Rivaroxaban Denise Chua (Trial 3)	168	240	3.60072	288.979	2986.71
Rivaroxaban Denise Chua (Trial 4)	168	240	3.60072	235.727	2316.68
Rivaroxaban Denise Chua (Trial 5)	168	240	3.60072	279.196	2817.11
Rivaroxaban Denise Chua (Trial 6)	168	240	3.60072	290.51	3423.25
Rivaroxaban Denise Chua (Trial 7)	168	240	3.60072	254.948	2581.12
Rivaroxaban Denise Chua (Trial 8)	168	240	3.60072	281.509	2784.93
Rivaroxaban Denise Chua (Trial 9)	168	240	2.40016	253.177	2808.98
Rivaroxaban Denise Chua (Trial 10)	168	240	3.60072	247.455	2878.31
Rivaroxaban Denise Chua + Interaction	168	240	3.60072	306.73	3721.58
Rivaroxaban Denise Chua + Interaction (Trial 1)	168	240	3.60072	350.996	4198.65
Rivaroxaban Denise Chua + Interaction (Trial 2)	168	240	3.60072	313.157	3602.39
Rivaroxaban Denise Chua + Interaction (Trial 3)	168	240	3.60072	323.16	3855.58
Rivaroxaban Denise Chua + Interaction (Trial 4)	168	240	3.60072	270.911	3063.15
Rivaroxaban Denise Chua + Interaction (Trial 5)	168	240	3.60072	315.651	3755.15
Rivaroxaban Denise Chua + Interaction (Trial 6)	168	240	3.60072	321.463	4314.03
Rivaroxaban Denise Chua + Interaction (Trial 7)	168	240	3.60072	288.18	3311.68
Rivaroxaban Denise Chua + Interaction (Trial 8)	168	240	3.60072	321.215	3686.6
Rivaroxaban Denise Chua + Interaction (Trial 9)	168	240	3.60072	284.264	3738.36
Rivaroxaban Denise Chua + Interaction (Trial 10)	168	240	3.60072	278.304	3690.15
Verapamil Denise Chua	0	24	9.6	35.0583	454.431
Verapamil Denise Chua (Trial 1)	0	24	9.6	36.6736	482.7
Verapamil Denise Chua (Trial 2)	0	24	9.6	30.8105	394.965
Verapamil Denise Chua (Trial 3)	0	24	9.6	37.7549	479.635
Verapamil Denise Chua (Trial 4)	0	24	9.6	28.7112	351.08
Verapamil Denise Chua (Trial 5)	0	24	9.6	30.5991	416.368
Verapamil Denise Chua (Trial 6)	0	24	10.8	43.4983	607.542
Verapamil Denise Chua (Trial 7)	0	24	9.6	31.4833	403.368
Verapamil Denise Chua (Trial 8)	0	24	9.6	37.7383	485.354
Verapamil Denise Chua (Trial 9)	0	24	10.8	36.598	477.716
Verapamil Denise Chua (Trial 10)	0	24	9.6	37.0566	445.581
SV-Norverapamil	0	24	12	30.7881	468.64
SV-Norverapamil (Trial 1)	0	24	12	31.3528	489.976
SV-Norverapamil (Trial 2)	0	24	12	28.5912	431.19
SV-Norverapamil (Trial 3)	0	24	12	31.8279	482.579
SV-Norverapamil (Trial 4)	0	24	12	27.4614	396.654
SV-Norverapamil (Trial 5)	0	24	12	27.6787	441.387
SV-Norverapamil (Trial 6)	0	24	12	29.8721	483.945
SV-Norverapamil (Trial 7)	0	24	12	26.4525	406.563
SV-Norverapamil (Trial 8)	0	24	12	36.3193	541.855
SV-Norverapamil (Trial 9)	0	24	12	31.721	479.217
SV-Norverapamil (Trial 10)	0	24	12	36.604	533.034
Population Statistics
Time (h)			0	1.2	2.4	3.6	4.8	6	7.2	8.4	9.6	10.8	12	13.2	14.4	15.6	16.8	18	19.2	20.4	21.6	22.8	24	25.2	26.4	27.6	28.8	30	31.2	32.4	33.6	34.8	36	37.2	38.4	39.6	40.8	42	43.2	44.4	45.6	46.8	48	49.2	50.4	51.6	52.8	54	55.2
CSys Mean (ng/mL)-Rivaroxaban Denise Chua			0	0	0	0	0	0	0	0	0	0	0	0	0	0	0	0	0	0	0	0	0	0	0	0	0	0	0	0	0	0	0	0	0	0	0	0	0	0	0	0	0	0	0	0	0	0	0
CSys 95th percentile			0	0	0	0	0	0	0	0	0	0	0	0	0	0	0	0	0	0	0	0	0	0	0	0	0	0	0	0	0	0	0	0	0	0	0	0	0	0	0	0	0	0	0	0	0	0	0
CSys 5th percentile			0	0	0	0	0	0	0	0	0	0	0	0	0	0	0	0	0	0	0	0	0	0	0	0	0	0	0	0	0	0	0	0	0	0	0	0	0	0	0	0	0	0	0	0	0	0	0
Time (h)			0	1.2	2.4	3.6	4.8	6	7.2	8.4	9.6	10.8	12	13.2	14.4	15.6	16.8	18	19.2	20.4	21.6	22.8	24	25.2	26.4	27.6	28.8	30	31.2	32.4	33.6	34.8	36	37.2	38.4	39.6	40.8	42	43.2	44.4	45.6	46.8	48	49.2	50.4	51.6	52.8	54	55.2
CSys Mean (ng/mL) - Rivaroxaban Denise Chua + interaction			0	0	0	0	0	0	0	0	0	0	0	0	0	0	0	0	0	0	0	0	0	0	0	0	0	0	0	0	0	0	0	0	0	0	0	0	0	0	0	0	0	0	0	0	0	0	0
CSys+interaction 95th percentile			0	0	0	0	0	0	0	0	0	0	0	0	0	0	0	0	0	0	0	0	0	0	0	0	0	0	0	0	0	0	0	0	0	0	0	0	0	0	0	0	0	0	0	0	0	0	0
CSys+interaction 5th percentile			0	0	0	0	0	0	0	0	0	0	0	0	0	0	0	0	0	0	0	0	0	0	0	0	0	0	0	0	0	0	0	0	0	0	0	0	0	0	0	0	0	0	0	0	0	0	0
Time (h)			0	1.2	2.4	3.6	4.8	6	7.2	8.4	9.6	10.8	12	13.2	14.4	15.6	16.8	18	19.2	20.4	21.6	22.8	24	25.2	26.4	27.6	28.8	30	31.2	32.4	33.6	34.8	36	37.2	38.4	39.6	40.8	42	43.2	44.4	45.6	46.8	48	49.2	50.4	51.6	52.8	54	55.2
ISys 1 Mean (ng/mL)-Verapamil Denise Chua			0	7.473	9.43918	8.64519	11.8543	21.8048	24.2207	27.9841	35.0583	34.6399	31.0241	26.0861	22.1208	19.5633	17.916	16.6782	15.6995	14.8675	14.145	13.3931	12.1587	39.2114	46.672	42.9924	50.8917	81.9678	90.8175	101.013	120.416	118.763	107.235	92.0432	79.3967	70.7166	64.7864	60.1444	56.3008	52.9027	49.8284	46.8694	43.109	91.6052	103.964	95.6519	107.87	158.844	171.542
ISys 1 95th percentile			0	16.1417	19.6797	17.0642	21.6344	40.9815	48.4177	54.9919	70.0831	71.7266	66.3539	57.7901	50.5142	45.1225	41.6811	39.1177	37.0844	35.4341	34.6958	34.0159	30.9537	87.1601	106.139	91.3786	102.875	165.793	193.458	215.703	252.846	250.635	236.758	204.252	176.144	158.72	151.951	144.703	136.337	128.968	121.778	115.169	107.568	206.038	217.717	199.413	216.743	322.527	346.94
ISys 1 5th percentile			0	2.24013	3.9186	3.35044	4.95361	8.0713	8.05617	8.81602	10.1846	9.73672	8.98706	8.06677	6.83127	5.45716	5.11636	4.50492	3.97323	3.80067	3.50275	2.91858	2.23062	10.6549	14.7152	13.2715	16.8356	20.4744	20.8279	22.8218	24.3958	23.1509	21.3616	18.4383	15.8101	13.1787	11.7917	11.4698	10.8216	10.3459	9.59965	8.31781	7.20855	21.3562	30.5305	26.1879	30.8207	45.5135	44.894
Time (h)			0	1.2	2.4	3.6	4.8	6	7.2	8.4	9.6	10.8	12	13.2	14.4	15.6	16.8	18	19.2	20.4	21.6	22.8	24	25.2	26.4	27.6	28.8	30	31.2	32.4	33.6	34.8	36	37.2	38.4	39.6	40.8	42	43.2	44.4	45.6	46.8	48	49.2	50.4	51.6	52.8	54	55.2
ISys 5 Mean (ng/mL)-SV-Norverapamil			0	1.94564	5.92213	7.93361	9.13413	14.0222	19.2009	22.6213	26.8778	30.153	30.7881	29.5951	27.6152	25.661	24.0744	22.8263	21.8205	20.9877	20.2665	19.6155	18.9447	21.7627	28.8645	32.0792	33.4776	40.17	47.4199	52.219	58.0085	62.6603	63.7804	62.2956	59.4539	56.3483	53.7157	51.5699	49.7834	48.2507	46.8663	45.5578	44.2304	46.9723	55.5508	59.4083	60.9012	69.0006	77.7857
ISys 5 95th percentile			0	4.20395	10.3207	14.0463	15.258	24.1597	32.512	37.6368	44.6148	50.1277	50.8137	50.2379	47.267	44.1758	42.4335	41.4439	40.2694	39.1781	38.2353	37.405	36.6777	38.8522	49.1909	53.0924	55.0923	65.0012	74.5274	81.3622	89.5686	97.8094	102.517	103.03	100.047	95.8484	92.8289	90.3436	89.3992	88.3891	86.0666	84.1468	82.4517	85.7075	98.7759	104.43	106.589	113.881	130.898
ISys 5 5th percentile			0	0.391623	2.09736	3.83878	5.06109	8.04648	10.5558	12.2508	12.5397	12.6404	12.3266	12.1572	10.198	8.31856	7.49811	6.87667	6.43001	6.09907	5.84626	5.25444	4.69129	8.36721	13.5727	15.7028	16.3992	22.1843	26.1045	28.0138	28.0099	27.3959	25.5475	22.3768	21.5493	19.4649	17.4353	16.3496	15.2186	14.3642	13.6898	12.8936	12.1012	16.6925	25.0446	28.2542	29.3045	36.2351	42.6909
Trial Statistics
Type		Trial
Time (h)			0	1.2	2.4	3.6	4.8	6	7.2	8.4	9.6	10.8	12	13.2	14.4	15.6	16.8	18	19.2	20.4	21.6	22.8	24	25.2	26.4	27.6	28.8	30	31.2	32.4	33.6	34.8	36	37.2	38.4	39.6	40.8	42	43.2	44.4	45.6	46.8	48	49.2	50.4	51.6	52.8	54	55.2
CSys Mean (ng/mL)-Rivaroxaban Denise Chua (Trial 1)		1	0	0	0	0	0	0	0	0	0	0	0	0	0	0	0	0	0	0	0	0	0	0	0	0	0	0	0	0	0	0	0	0	0	0	0	0	0	0	0	0	0	0	0	0	0	0	0
CSys Mean (ng/mL)-Rivaroxaban Denise Chua (Trial 2)		2	0	0	0	0	0	0	0	0	0	0	0	0	0	0	0	0	0	0	0	0	0	0	0	0	0	0	0	0	0	0	0	0	0	0	0	0	0	0	0	0	0	0	0	0	0	0	0
CSys Mean (ng/mL)-Rivaroxaban Denise Chua (Trial 3)		3	0	0	0	0	0	0	0	0	0	0	0	0	0	0	0	0	0	0	0	0	0	0	0	0	0	0	0	0	0	0	0	0	0	0	0	0	0	0	0	0	0	0	0	0	0	0	0
CSys Mean (ng/mL)-Rivaroxaban Denise Chua (Trial 4)		4	0	0	0	0	0	0	0	0	0	0	0	0	0	0	0	0	0	0	0	0	0	0	0	0	0	0	0	0	0	0	0	0	0	0	0	0	0	0	0	0	0	0	0	0	0	0	0
CSys Mean (ng/mL)-Rivaroxaban Denise Chua (Trial 5)		5	0	0	0	0	0	0	0	0	0	0	0	0	0	0	0	0	0	0	0	0	0	0	0	0	0	0	0	0	0	0	0	0	0	0	0	0	0	0	0	0	0	0	0	0	0	0	0
CSys Mean (ng/mL)-Rivaroxaban Denise Chua (Trial 6)		6	0	0	0	0	0	0	0	0	0	0	0	0	0	0	0	0	0	0	0	0	0	0	0	0	0	0	0	0	0	0	0	0	0	0	0	0	0	0	0	0	0	0	0	0	0	0	0
CSys Mean (ng/mL)-Rivaroxaban Denise Chua (Trial 7)		7	0	0	0	0	0	0	0	0	0	0	0	0	0	0	0	0	0	0	0	0	0	0	0	0	0	0	0	0	0	0	0	0	0	0	0	0	0	0	0	0	0	0	0	0	0	0	0
CSys Mean (ng/mL)-Rivaroxaban Denise Chua (Trial 8)		8	0	0	0	0	0	0	0	0	0	0	0	0	0	0	0	0	0	0	0	0	0	0	0	0	0	0	0	0	0	0	0	0	0	0	0	0	0	0	0	0	0	0	0	0	0	0	0
CSys Mean (ng/mL)-Rivaroxaban Denise Chua (Trial 9)		9	0	0	0	0	0	0	0	0	0	0	0	0	0	0	0	0	0	0	0	0	0	0	0	0	0	0	0	0	0	0	0	0	0	0	0	0	0	0	0	0	0	0	0	0	0	0	0
CSys Mean (ng/mL)-Rivaroxaban Denise Chua (Trial 10)		10	0	0	0	0	0	0	0	0	0	0	0	0	0	0	0	0	0	0	0	0	0	0	0	0	0	0	0	0	0	0	0	0	0	0	0	0	0	0	0	0	0	0	0	0	0	0	0
Time (h)			0	1.2	2.4	3.6	4.8	6	7.2	8.4	9.6	10.8	12	13.2	14.4	15.6	16.8	18	19.2	20.4	21.6	22.8	24	25.2	26.4	27.6	28.8	30	31.2	32.4	33.6	34.8	36	37.2	38.4	39.6	40.8	42	43.2	44.4	45.6	46.8	48	49.2	50.4	51.6	52.8	54	55.2
CSys Mean (ng/mL) - Rivaroxaban Denise Chua + interaction (Trial 1)		1	0	0	0	0	0	0	0	0	0	0	0	0	0	0	0	0	0	0	0	0	0	0	0	0	0	0	0	0	0	0	0	0	0	0	0	0	0	0	0	0	0	0	0	0	0	0	0
CSys Mean (ng/mL) - Rivaroxaban Denise Chua + interaction (Trial 2)		2	0	0	0	0	0	0	0	0	0	0	0	0	0	0	0	0	0	0	0	0	0	0	0	0	0	0	0	0	0	0	0	0	0	0	0	0	0	0	0	0	0	0	0	0	0	0	0
CSys Mean (ng/mL) - Rivaroxaban Denise Chua + interaction (Trial 3)		3	0	0	0	0	0	0	0	0	0	0	0	0	0	0	0	0	0	0	0	0	0	0	0	0	0	0	0	0	0	0	0	0	0	0	0	0	0	0	0	0	0	0	0	0	0	0	0
CSys Mean (ng/mL) - Rivaroxaban Denise Chua + interaction (Trial 4)		4	0	0	0	0	0	0	0	0	0	0	0	0	0	0	0	0	0	0	0	0	0	0	0	0	0	0	0	0	0	0	0	0	0	0	0	0	0	0	0	0	0	0	0	0	0	0	0
CSys Mean (ng/mL) - Rivaroxaban Denise Chua + interaction (Trial 5)		5	0	0	0	0	0	0	0	0	0	0	0	0	0	0	0	0	0	0	0	0	0	0	0	0	0	0	0	0	0	0	0	0	0	0	0	0	0	0	0	0	0	0	0	0	0	0	0
CSys Mean (ng/mL) - Rivaroxaban Denise Chua + interaction (Trial 6)		6	0	0	0	0	0	0	0	0	0	0	0	0	0	0	0	0	0	0	0	0	0	0	0	0	0	0	0	0	0	0	0	0	0	0	0	0	0	0	0	0	0	0	0	0	0	0	0
CSys Mean (ng/mL) - Rivaroxaban Denise Chua + interaction (Trial 7)		7	0	0	0	0	0	0	0	0	0	0	0	0	0	0	0	0	0	0	0	0	0	0	0	0	0	0	0	0	0	0	0	0	0	0	0	0	0	0	0	0	0	0	0	0	0	0	0
CSys Mean (ng/mL) - Rivaroxaban Denise Chua + interaction (Trial 8)		8	0	0	0	0	0	0	0	0	0	0	0	0	0	0	0	0	0	0	0	0	0	0	0	0	0	0	0	0	0	0	0	0	0	0	0	0	0	0	0	0	0	0	0	0	0	0	0
CSys Mean (ng/mL) - Rivaroxaban Denise Chua + interaction (Trial 9)		9	0	0	0	0	0	0	0	0	0	0	0	0	0	0	0	0	0	0	0	0	0	0	0	0	0	0	0	0	0	0	0	0	0	0	0	0	0	0	0	0	0	0	0	0	0	0	0
CSys Mean (ng/mL) - Rivaroxaban Denise Chua + interaction (Trial 10)		10	0	0	0	0	0	0	0	0	0	0	0	0	0	0	0	0	0	0	0	0	0	0	0	0	0	0	0	0	0	0	0	0	0	0	0	0	0	0	0	0	0	0	0	0	0	0	0
Time (h)			0	1.2	2.4	3.6	4.8	6	7.2	8.4	9.6	10.8	12	13.2	14.4	15.6	16.8	18	19.2	20.4	21.6	22.8	24	25.2	26.4	27.6	28.8	30	31.2	32.4	33.6	34.8	36	37.2	38.4	39.6	40.8	42	43.2	44.4	45.6	46.8	48	49.2	50.4	51.6	52.8	54	55.2
ISys 1 Mean (ng/mL)-Verapamil Denise Chua (Trial 1)		1	0	6.7857	8.97535	8.68484	12.1768	22.0477	25.1044	29.1594	36.6736	36.4352	32.9006	28.1533	24.3587	21.9451	20.2701	18.6594	17.5131	16.2556	15.2712	14.4579	12.8449	39.2232	49.0368	45.5373	53.8811	86.2124	94.7438	106.29	127.642	126.104	114.037	98.5376	85.8825	77.234	71.3091	66.7372	62.9861	59.4454	55.5146	51.7118	47.3525	100.204	111.126	101.445	113.299	164.655	180.034
ISys 1 Mean (ng/mL)-Verapamil Denise Chua (Trial 2)		2	0	6.7366	8.88635	8.24876	11.3	19.7129	21.4038	24.5294	30.8105	30.1821	26.7139	22.2471	18.7352	16.462	15.0675	14.0827	13.3291	12.7311	11.9043	11.0458	10.0168	33.3706	41.6097	38.4075	45.7205	73.0541	80.976	91.4037	109.909	107.322	95.6422	81.0731	69.4391	61.6674	56.328	52.3456	49.1568	46.525	44.0581	41.0496	37.4026	82.82	95.3148	87.0827	99.7354	147.472	159.356
ISys 1 Mean (ng/mL)-Verapamil Denise Chua (Trial 3)		3	0	8.12648	9.94405	9.25464	12.7709	24.1162	26.8307	30.3167	37.7549	37.2742	33.2513	27.8507	23.4345	20.5117	18.5101	16.8835	15.5901	14.6218	13.8695	12.9466	11.6741	43.6946	47.6524	44.2211	53.9777	86.7698	99.4975	109.753	129.805	127.915	114.284	97.0602	82.8616	72.9922	65.8718	60.0693	55.0609	51.0562	47.5187	43.7528	39.6667	94.5179	103.219	95.0569	109.338	161.795	178.049
ISys 1 Mean (ng/mL)-Verapamil Denise Chua (Trial 4)		4	0	6.39759	8.46722	7.30832	10.1724	18.8059	19.6724	22.7452	28.7112	27.8344	24.2644	19.8092	16.3201	14.1035	12.7182	11.6983	10.8601	10.1998	9.48499	8.93381	8.11898	33.5676	37.7467	31.9218	39.1986	65.0206	69.277	77.304	93.8504	91.0812	80.3238	67.124	56.6491	49.2633	44.305	40.7028	37.6882	35.0156	32.6494	30.5126	27.6771	68.595	79.9318	71.1387	82.2199	127.649	132.829
ISys 1 Mean (ng/mL)-Verapamil Denise Chua (Trial 5)		5	0	7.13176	9.92566	9.03346	11.6637	19.4634	21.6627	24.7814	30.5991	30.1427	27.0967	23.1129	19.9294	17.8803	16.5959	15.6808	14.9795	14.4257	13.9491	13.0129	11.8124	37.1482	46.8558	42.846	50.5179	74.6576	81.6053	90.3443	110.112	108.49	98.0888	84.7536	73.8615	66.415	61.3262	57.4153	54.2164	51.4391	48.9026	46.1139	42.6645	85.5529	105.112	98.0068	108.388	153.115	164.361
ISys 1 Mean (ng/mL)-Verapamil Denise Chua (Trial 6)		6	0	10.5219	13.3887	11.8669	15.8641	27.517	30.2681	34.7682	43.4419	43.4983	39.6683	34.3516	30.0472	27.2766	25.5559	24.2929	22.9942	21.7282	20.7296	19.6407	17.7295	53.9501	63.8435	57.5667	65.5509	102.334	109.544	120.752	143.965	142.362	129.372	112.56	98.7906	89.365	82.9176	77.6111	72.3711	67.9367	64.4965	61.4931	57.5948	120.102	137.114	122.929	134.312	194.198	202.821
ISys 1 Mean (ng/mL)-Verapamil Denise Chua (Trial 7)		7	0	7.07283	7.42165	6.9662	10.3384	20.964	22.5106	25.4204	31.4833	30.8515	27.3514	22.852	19.2787	16.9906	15.5639	14.5553	13.7897	13.1141	12.4933	11.8015	10.6405	35.3923	38.9673	36.9001	46.022	74.8173	81.3565	89.5949	105.839	103.841	93.6527	79.8028	67.9569	60.1437	54.9361	51.0196	47.881	45.2631	42.7756	40.1019	36.5605	81.6378	87.1015	81.1873	96.1145	141.392	150.463
ISys 1 Mean (ng/mL)-Verapamil Denise Chua (Trial 8)		8	0	8.08489	9.50816	8.48504	11.9782	22.8063	25.3415	29.638	37.7383	37.5969	33.6991	28.0893	23.6186	20.7552	18.9809	17.7368	16.7976	16.0654	15.4889	15.0368	14.0318	41.879	49.5286	45.5548	53.1659	88.5569	98.3356	108.501	129.281	128.134	116.449	101.402	87.9514	78.9436	72.664	67.0256	62.9365	59.6926	56.3722	53.8552	50.231	103.634	112.577	103.087	116.046	169.057	187.542
ISys 1 Mean (ng/mL)-Verapamil Denise Chua (Trial 9)		9	0	7.27189	9.92373	8.74705	11.4041	21.5203	24.8142	29.0423	36.3138	36.598	33.7244	28.3239	23.7868	20.8581	19.005	17.6749	16.6511	15.8406	15.1948	14.6678	13.4673	39.287	51.7787	48.5316	55.0367	89.9309	99.6523	110.236	127.828	129.084	121.231	106.124	92.4789	82.4525	75.8527	70.9273	66.9871	62.2005	58.3679	55.2148	50.8732	100.765	115.448	106.571	116.061	168.413	180.645
ISys 1 Mean (ng/mL)-Verapamil Denise Chua (Trial 10)		10	0	6.60046	7.95086	7.85664	10.8741	21.0939	24.5991	29.4397	37.0566	35.9862	31.5706	26.0711	21.699	18.8501	16.8925	15.5171	14.4904	13.6927	13.0638	12.3872	11.2504	34.6014	39.7005	38.4375	45.846	78.3248	93.1868	105.954	125.93	123.292	109.265	91.9948	78.0957	68.6894	62.3531	57.5901	53.7242	50.4525	47.6281	44.8886	41.0675	78.223	92.6925	90.0135	103.184	160.696	179.318
Time (h)			0	1.2	2.4	3.6	4.8	6	7.2	8.4	9.6	10.8	12	13.2	14.4	15.6	16.8	18	19.2	20.4	21.6	22.8	24	25.2	26.4	27.6	28.8	30	31.2	32.4	33.6	34.8	36	37.2	38.4	39.6	40.8	42	43.2	44.4	45.6	46.8	48	49.2	50.4	51.6	52.8	54	55.2
ISys 5 Mean (ng/mL)-SV-Norverapamil (Trial 1)		1	0	1.28312	4.80502	7.16471	8.70548	13.2718	18.3166	22.1878	26.5144	30.1049	31.3528	30.8648	29.5121	28.0197	26.7347	25.5815	24.5675	23.6855	22.8623	22.113	21.3309	22.7116	28.5409	32.0772	33.8423	39.58	46.3389	51.4794	57.2714	62.1665	64.0018	63.4489	61.5909	59.4091	57.4277	55.7459	54.3185	53.0757	51.8772	50.6175	49.3036	51.0014	57.6698	61.0077	62.4329	68.2716	76.3878
ISys 5 Mean (ng/mL)-SV-Norverapamil (Trial 2)		2	0	1.86149	5.8577	7.9756	9.276	14.0274	18.7057	21.6185	25.4922	28.3637	28.5912	27.0766	24.92	22.8902	21.2994	20.116	19.2224	18.5272	17.9098	17.2894	16.6097	19.19	26.7935	30.6274	32.2512	39.3426	46.6321	51.3992	57.2562	61.4515	61.511	58.8496	55.1697	51.7276	48.9375	46.7458	45.0133	43.6054	42.3686	41.1992	39.943	43.4284	52.8681	57.0085	58.6461	68.0759	77.2151
ISys 5 Mean (ng/mL)-SV-Norverapamil (Trial 3)		3	0	1.89931	6.12643	8.17212	9.45395	14.6939	20.3063	23.8871	28.184	31.3685	31.8279	30.4753	28.3852	26.3504	24.6856	23.337	22.1987	21.2381	20.4253	19.6896	18.8894	21.9184	29.1968	32.1584	33.5744	40.8505	48.9976	54.2403	60.4773	65.2533	66.0153	63.8596	60.4494	57.0391	54.1588	51.7785	49.7477	47.9611	46.3607	44.7599	43.0839	45.8634	55.2124	59.1408	60.7585	69.9458	79.9115
ISys 5 Mean (ng/mL)-SV-Norverapamil (Trial 4)		4	0	1.78524	5.88084	7.76772	8.53696	13.245	17.6916	20.4162	24.2709	27.2206	27.4614	25.8431	23.4717	21.1924	19.3549	17.9301	16.7736	15.8039	14.9641	14.1933	13.4825	17.0387	24.5252	26.9373	27.5307	34.5161	41.7855	46.4703	52.6535	57.6475	58.4845	56.2881	52.7079	49.0356	45.7498	43.0292	40.7582	38.7381	36.9174	35.2286	33.6019	37.207	46.2563	49.5586	50.3544	59.374	69.0548
ISys 5 Mean (ng/mL)-SV-Norverapamil (Trial 5)		5	0	1.52293	5.76707	8.13643	9.38755	13.8144	18.0118	20.7076	24.1666	26.979	27.6787	26.8917	25.4385	23.9677	22.7657	21.8345	21.1048	20.5171	20.0305	19.5774	19.0441	21.3293	28.972	32.9826	34.5966	40.4592	46.1257	49.5976	54.0445	57.861	58.8384	57.6981	55.5054	53.1728	51.1476	49.4744	48.0778	46.884	45.8315	44.867	43.8926	45.9634	54.5924	59.3539	61.2676	68.2871	75.6788
ISys 5 Mean (ng/mL)-SV-Norverapamil (Trial 6)		6	0	1.63668	5.9375	8.28838	9.59919	13.8526	18.5154	21.7358	25.5279	28.7313	29.8721	29.4777	28.3183	27.0367	25.9448	25.0786	24.3151	23.5802	22.8507	22.1992	21.5777	23.7024	30.1893	33.1721	34.2223	38.7417	44.1917	47.8906	52.2878	56.1967	57.6577	57.159	55.5795	53.7381	52.0764	50.6653	49.3224	48.0352	46.8785	45.8608	44.9253	47.0284	54.6601	58.2846	59.3185	64.532	70.907
ISys 5 Mean (ng/mL)-SV-Norverapamil (Trial 7)		7	0	2.87961	5.38757	6.47771	7.66389	12.5175	17.2524	20.0847	23.6746	26.1856	26.4525	25.2683	23.5357	21.8918	20.5751	19.5498	18.7393	18.0819	17.5086	16.9336	16.2849	20.5521	26.1795	28.1501	29.6648	36.6727	42.4521	45.8811	50.6773	53.859	53.849	51.8576	48.9902	46.2547	44.0366	42.2657	40.8164	39.5973	38.5243	37.474	36.2296	39.537	47.6513	50.3558	51.7558	60.5899	67.7174
ISys 5 Mean (ng/mL)-SV-Norverapamil (Trial 8)		8	0	2.61384	7.34863	9.272	10.3674	16.4664	22.6336	26.5682	31.6049	35.5598	36.3193	34.6714	31.9916	29.3953	27.3229	25.7438	24.5238	23.5539	22.7605	22.0964	21.4638	24.7377	33.2375	36.6984	37.9384	45.2616	53.7708	59.4987	65.7418	71.1466	73.1935	72.5852	70.1072	66.7361	63.7987	61.1553	58.8747	57.0064	55.2243	53.4952	51.863	55.1713	65.4905	69.7553	71.0181	79.0436	88.4931
ISys 5 Mean (ng/mL)-SV-Norverapamil (Trial 9)		9	0	2.13196	6.45364	8.30674	9.15321	14.0873	19.6834	23.4405	27.9915	31.2674	31.721	30.3261	28.0982	25.9462	24.2611	22.9832	21.9932	21.2042	20.5592	20.0204	19.4387	22.3243	29.5334	32.6902	33.8407	40.5233	47.8281	52.0157	57.1746	61.7028	63.4775	62.8844	60.3536	56.6281	53.7547	51.7321	50.2138	48.9593	47.8248	46.8119	45.7234	49.2046	57.3459	60.437	61.4356	68.7185	76.3948
ISys 5 Mean (ng/mL)-SV-Norverapamil (Trial 10)		10	0	1.84222	5.6569	7.77465	9.19767	14.2461	20.8916	25.5667	31.3512	35.7495	36.604	35.0562	32.4808	29.9196	27.7996	26.108	24.7663	23.6847	22.7945	22.0425	21.3252	24.1221	31.4772	35.2979	37.3143	45.7528	56.0766	63.7174	72.5007	79.3181	80.7757	78.326	74.0848	69.7416	66.0689	63.1065	60.6917	58.6447	56.8561	55.2644	53.7373	55.3176	63.7614	69.181	72.0245	83.1674	96.0965
Individual Statistics
Type	Individual	Trial
Time (h)			0	1.2	2.4	3.6	4.8	6	7.2	8.4	9.6	10.8	12	13.2	14.4	15.6	16.8	18	19.2	20.4	21.6	22.8	24	25.2	26.4	27.6	28.8	30	31.2	32.4	33.6	34.8	36	37.2	38.4	39.6	40.8	42	43.2	44.4	45.6	46.8	48	49.2	50.4	51.6	52.8	54	55.2
CSys (ng/mL)	1	1	0	0	0	0	0	0	0	0	0	0	0	0	0	0	0	0	0	0	0	0	0	0	0	0	0	0	0	0	0	0	0	0	0	0	0	0	0	0	0	0	0	0	0	0	0	0	0
CSys (ng/mL)	109	1	0	0	0	0	0	0	0	0	0	0	0	0	0	0	0	0	0	0	0	0	0	0	0	0	0	0	0	0	0	0	0	0	0	0	0	0	0	0	0	0	0	0	0	0	0	0	0
CSys (ng/mL)	25	1	0	0	0	0	0	0	0	0	0	0	0	0	0	0	0	0	0	0	0	0	0	0	0	0	0	0	0	0	0	0	0	0	0	0	0	0	0	0	0	0	0	0	0	0	0	0	0
CSys (ng/mL)	95	1	0	0	0	0	0	0	0	0	0	0	0	0	0	0	0	0	0	0	0	0	0	0	0	0	0	0	0	0	0	0	0	0	0	0	0	0	0	0	0	0	0	0	0	0	0	0	0
CSys (ng/mL)	53	1	0	0	0	0	0	0	0	0	0	0	0	0	0	0	0	0	0	0	0	0	0	0	0	0	0	0	0	0	0	0	0	0	0	0	0	0	0	0	0	0	0	0	0	0	0	0	0
CSys (ng/mL)	60	1	0	0	0	0	0	0	0	0	0	0	0	0	0	0	0	0	0	0	0	0	0	0	0	0	0	0	0	0	0	0	0	0	0	0	0	0	0	0	0	0	0	0	0	0	0	0	0
CSys (ng/mL)	125	1	0	0	0	0	0	0	0	0	0	0	0	0	0	0	0	0	0	0	0	0	0	0	0	0	0	0	0	0	0	0	0	0	0	0	0	0	0	0	0	0	0	0	0	0	0	0	0
CSys (ng/mL)	8	1	0	0	0	0	0	0	0	0	0	0	0	0	0	0	0	0	0	0	0	0	0	0	0	0	0	0	0	0	0	0	0	0	0	0	0	0	0	0	0	0	0	0	0	0	0	0	0
CSys (ng/mL)	39	1	0	0	0	0	0	0	0	0	0	0	0	0	0	0	0	0	0	0	0	0	0	0	0	0	0	0	0	0	0	0	0	0	0	0	0	0	0	0	0	0	0	0	0	0	0	0	0
CSys (ng/mL)	116	1	0	0	0	0	0	0	0	0	0	0	0	0	0	0	0	0	0	0	0	0	0	0	0	0	0	0	0	0	0	0	0	0	0	0	0	0	0	0	0	0	0	0	0	0	0	0	0
CSys (ng/mL)	111	1	0	0	0	0	0	0	0	0	0	0	0	0	0	0	0	0	0	0	0	0	0	0	0	0	0	0	0	0	0	0	0	0	0	0	0	0	0	0	0	0	0	0	0	0	0	0	0
CSys (ng/mL)	12	1	0	0	0	0	0	0	0	0	0	0	0	0	0	0	0	0	0	0	0	0	0	0	0	0	0	0	0	0	0	0	0	0	0	0	0	0	0	0	0	0	0	0	0	0	0	0	0
CSys (ng/mL)	66	1	0	0	0	0	0	0	0	0	0	0	0	0	0	0	0	0	0	0	0	0	0	0	0	0	0	0	0	0	0	0	0	0	0	0	0	0	0	0	0	0	0	0	0	0	0	0	0
CSys (ng/mL)	2	2	0	0	0	0	0	0	0	0	0	0	0	0	0	0	0	0	0	0	0	0	0	0	0	0	0	0	0	0	0	0	0	0	0	0	0	0	0	0	0	0	0	0	0	0	0	0	0
CSys (ng/mL)	3	2	0	0	0	0	0	0	0	0	0	0	0	0	0	0	0	0	0	0	0	0	0	0	0	0	0	0	0	0	0	0	0	0	0	0	0	0	0	0	0	0	0	0	0	0	0	0	0
CSys (ng/mL)	33	2	0	0	0	0	0	0	0	0	0	0	0	0	0	0	0	0	0	0	0	0	0	0	0	0	0	0	0	0	0	0	0	0	0	0	0	0	0	0	0	0	0	0	0	0	0	0	0
CSys (ng/mL)	18	2	0	0	0	0	0	0	0	0	0	0	0	0	0	0	0	0	0	0	0	0	0	0	0	0	0	0	0	0	0	0	0	0	0	0	0	0	0	0	0	0	0	0	0	0	0	0	0
CSys (ng/mL)	6	2	0	0	0	0	0	0	0	0	0	0	0	0	0	0	0	0	0	0	0	0	0	0	0	0	0	0	0	0	0	0	0	0	0	0	0	0	0	0	0	0	0	0	0	0	0	0	0
CSys (ng/mL)	113	2	0	0	0	0	0	0	0	0	0	0	0	0	0	0	0	0	0	0	0	0	0	0	0	0	0	0	0	0	0	0	0	0	0	0	0	0	0	0	0	0	0	0	0	0	0	0	0
CSys (ng/mL)	82	2	0	0	0	0	0	0	0	0	0	0	0	0	0	0	0	0	0	0	0	0	0	0	0	0	0	0	0	0	0	0	0	0	0	0	0	0	0	0	0	0	0	0	0	0	0	0	0
CSys (ng/mL)	102	2	0	0	0	0	0	0	0	0	0	0	0	0	0	0	0	0	0	0	0	0	0	0	0	0	0	0	0	0	0	0	0	0	0	0	0	0	0	0	0	0	0	0	0	0	0	0	0
CSys (ng/mL)	22	2	0	0	0	0	0	0	0	0	0	0	0	0	0	0	0	0	0	0	0	0	0	0	0	0	0	0	0	0	0	0	0	0	0	0	0	0	0	0	0	0	0	0	0	0	0	0	0
CSys (ng/mL)	107	2	0	0	0	0	0	0	0	0	0	0	0	0	0	0	0	0	0	0	0	0	0	0	0	0	0	0	0	0	0	0	0	0	0	0	0	0	0	0	0	0	0	0	0	0	0	0	0
CSys (ng/mL)	24	2	0	0	0	0	0	0	0	0	0	0	0	0	0	0	0	0	0	0	0	0	0	0	0	0	0	0	0	0	0	0	0	0	0	0	0	0	0	0	0	0	0	0	0	0	0	0	0
CSys (ng/mL)	45	2	0	0	0	0	0	0	0	0	0	0	0	0	0	0	0	0	0	0	0	0	0	0	0	0	0	0	0	0	0	0	0	0	0	0	0	0	0	0	0	0	0	0	0	0	0	0	0
CSys (ng/mL)	58	2	0	0	0	0	0	0	0	0	0	0	0	0	0	0	0	0	0	0	0	0	0	0	0	0	0	0	0	0	0	0	0	0	0	0	0	0	0	0	0	0	0	0	0	0	0	0	0
CSys (ng/mL)	23	3	0	0	0	0	0	0	0	0	0	0	0	0	0	0	0	0	0	0	0	0	0	0	0	0	0	0	0	0	0	0	0	0	0	0	0	0	0	0	0	0	0	0	0	0	0	0	0
CSys (ng/mL)	44	3	0	0	0	0	0	0	0	0	0	0	0	0	0	0	0	0	0	0	0	0	0	0	0	0	0	0	0	0	0	0	0	0	0	0	0	0	0	0	0	0	0	0	0	0	0	0	0
CSys (ng/mL)	50	3	0	0	0	0	0	0	0	0	0	0	0	0	0	0	0	0	0	0	0	0	0	0	0	0	0	0	0	0	0	0	0	0	0	0	0	0	0	0	0	0	0	0	0	0	0	0	0
CSys (ng/mL)	89	3	0	0	0	0	0	0	0	0	0	0	0	0	0	0	0	0	0	0	0	0	0	0	0	0	0	0	0	0	0	0	0	0	0	0	0	0	0	0	0	0	0	0	0	0	0	0	0
CSys (ng/mL)	118	3	0	0	0	0	0	0	0	0	0	0	0	0	0	0	0	0	0	0	0	0	0	0	0	0	0	0	0	0	0	0	0	0	0	0	0	0	0	0	0	0	0	0	0	0	0	0	0
CSys (ng/mL)	99	3	0	0	0	0	0	0	0	0	0	0	0	0	0	0	0	0	0	0	0	0	0	0	0	0	0	0	0	0	0	0	0	0	0	0	0	0	0	0	0	0	0	0	0	0	0	0	0
CSys (ng/mL)	127	3	0	0	0	0	0	0	0	0	0	0	0	0	0	0	0	0	0	0	0	0	0	0	0	0	0	0	0	0	0	0	0	0	0	0	0	0	0	0	0	0	0	0	0	0	0	0	0
CSys (ng/mL)	124	3	0	0	0	0	0	0	0	0	0	0	0	0	0	0	0	0	0	0	0	0	0	0	0	0	0	0	0	0	0	0	0	0	0	0	0	0	0	0	0	0	0	0	0	0	0	0	0
CSys (ng/mL)	15	3	0	0	0	0	0	0	0	0	0	0	0	0	0	0	0	0	0	0	0	0	0	0	0	0	0	0	0	0	0	0	0	0	0	0	0	0	0	0	0	0	0	0	0	0	0	0	0
CSys (ng/mL)	104	3	0	0	0	0	0	0	0	0	0	0	0	0	0	0	0	0	0	0	0	0	0	0	0	0	0	0	0	0	0	0	0	0	0	0	0	0	0	0	0	0	0	0	0	0	0	0	0
CSys (ng/mL)	123	3	0	0	0	0	0	0	0	0	0	0	0	0	0	0	0	0	0	0	0	0	0	0	0	0	0	0	0	0	0	0	0	0	0	0	0	0	0	0	0	0	0	0	0	0	0	0	0
CSys (ng/mL)	40	3	0	0	0	0	0	0	0	0	0	0	0	0	0	0	0	0	0	0	0	0	0	0	0	0	0	0	0	0	0	0	0	0	0	0	0	0	0	0	0	0	0	0	0	0	0	0	0
CSys (ng/mL)	17	3	0	0	0	0	0	0	0	0	0	0	0	0	0	0	0	0	0	0	0	0	0	0	0	0	0	0	0	0	0	0	0	0	0	0	0	0	0	0	0	0	0	0	0	0	0	0	0
CSys (ng/mL)	122	4	0	0	0	0	0	0	0	0	0	0	0	0	0	0	0	0	0	0	0	0	0	0	0	0	0	0	0	0	0	0	0	0	0	0	0	0	0	0	0	0	0	0	0	0	0	0	0
CSys (ng/mL)	120	4	0	0	0	0	0	0	0	0	0	0	0	0	0	0	0	0	0	0	0	0	0	0	0	0	0	0	0	0	0	0	0	0	0	0	0	0	0	0	0	0	0	0	0	0	0	0	0
CSys (ng/mL)	46	4	0	0	0	0	0	0	0	0	0	0	0	0	0	0	0	0	0	0	0	0	0	0	0	0	0	0	0	0	0	0	0	0	0	0	0	0	0	0	0	0	0	0	0	0	0	0	0
CSys (ng/mL)	62	4	0	0	0	0	0	0	0	0	0	0	0	0	0	0	0	0	0	0	0	0	0	0	0	0	0	0	0	0	0	0	0	0	0	0	0	0	0	0	0	0	0	0	0	0	0	0	0
CSys (ng/mL)	14	4	0	0	0	0	0	0	0	0	0	0	0	0	0	0	0	0	0	0	0	0	0	0	0	0	0	0	0	0	0	0	0	0	0	0	0	0	0	0	0	0	0	0	0	0	0	0	0
CSys (ng/mL)	42	4	0	0	0	0	0	0	0	0	0	0	0	0	0	0	0	0	0	0	0	0	0	0	0	0	0	0	0	0	0	0	0	0	0	0	0	0	0	0	0	0	0	0	0	0	0	0	0
CSys (ng/mL)	97	4	0	0	0	0	0	0	0	0	0	0	0	0	0	0	0	0	0	0	0	0	0	0	0	0	0	0	0	0	0	0	0	0	0	0	0	0	0	0	0	0	0	0	0	0	0	0	0
CSys (ng/mL)	115	4	0	0	0	0	0	0	0	0	0	0	0	0	0	0	0	0	0	0	0	0	0	0	0	0	0	0	0	0	0	0	0	0	0	0	0	0	0	0	0	0	0	0	0	0	0	0	0
CSys (ng/mL)	129	4	0	0	0	0	0	0	0	0	0	0	0	0	0	0	0	0	0	0	0	0	0	0	0	0	0	0	0	0	0	0	0	0	0	0	0	0	0	0	0	0	0	0	0	0	0	0	0
CSys (ng/mL)	85	4	0	0	0	0	0	0	0	0	0	0	0	0	0	0	0	0	0	0	0	0	0	0	0	0	0	0	0	0	0	0	0	0	0	0	0	0	0	0	0	0	0	0	0	0	0	0	0
CSys (ng/mL)	68	4	0	0	0	0	0	0	0	0	0	0	0	0	0	0	0	0	0	0	0	0	0	0	0	0	0	0	0	0	0	0	0	0	0	0	0	0	0	0	0	0	0	0	0	0	0	0	0
CSys (ng/mL)	128	4	0	0	0	0	0	0	0	0	0	0	0	0	0	0	0	0	0	0	0	0	0	0	0	0	0	0	0	0	0	0	0	0	0	0	0	0	0	0	0	0	0	0	0	0	0	0	0
CSys (ng/mL)	100	4	0	0	0	0	0	0	0	0	0	0	0	0	0	0	0	0	0	0	0	0	0	0	0	0	0	0	0	0	0	0	0	0	0	0	0	0	0	0	0	0	0	0	0	0	0	0	0
CSys (ng/mL)	11	5	0	0	0	0	0	0	0	0	0	0	0	0	0	0	0	0	0	0	0	0	0	0	0	0	0	0	0	0	0	0	0	0	0	0	0	0	0	0	0	0	0	0	0	0	0	0	0
CSys (ng/mL)	16	5	0	0	0	0	0	0	0	0	0	0	0	0	0	0	0	0	0	0	0	0	0	0	0	0	0	0	0	0	0	0	0	0	0	0	0	0	0	0	0	0	0	0	0	0	0	0	0
CSys (ng/mL)	84	5	0	0	0	0	0	0	0	0	0	0	0	0	0	0	0	0	0	0	0	0	0	0	0	0	0	0	0	0	0	0	0	0	0	0	0	0	0	0	0	0	0	0	0	0	0	0	0
CSys (ng/mL)	32	5	0	0	0	0	0	0	0	0	0	0	0	0	0	0	0	0	0	0	0	0	0	0	0	0	0	0	0	0	0	0	0	0	0	0	0	0	0	0	0	0	0	0	0	0	0	0	0
CSys (ng/mL)	77	5	0	0	0	0	0	0	0	0	0	0	0	0	0	0	0	0	0	0	0	0	0	0	0	0	0	0	0	0	0	0	0	0	0	0	0	0	0	0	0	0	0	0	0	0	0	0	0
CSys (ng/mL)	130	5	0	0	0	0	0	0	0	0	0	0	0	0	0	0	0	0	0	0	0	0	0	0	0	0	0	0	0	0	0	0	0	0	0	0	0	0	0	0	0	0	0	0	0	0	0	0	0
CSys (ng/mL)	103	5	0	0	0	0	0	0	0	0	0	0	0	0	0	0	0	0	0	0	0	0	0	0	0	0	0	0	0	0	0	0	0	0	0	0	0	0	0	0	0	0	0	0	0	0	0	0	0
CSys (ng/mL)	57	5	0	0	0	0	0	0	0	0	0	0	0	0	0	0	0	0	0	0	0	0	0	0	0	0	0	0	0	0	0	0	0	0	0	0	0	0	0	0	0	0	0	0	0	0	0	0	0
CSys (ng/mL)	91	5	0	0	0	0	0	0	0	0	0	0	0	0	0	0	0	0	0	0	0	0	0	0	0	0	0	0	0	0	0	0	0	0	0	0	0	0	0	0	0	0	0	0	0	0	0	0	0
CSys (ng/mL)	71	5	0	0	0	0	0	0	0	0	0	0	0	0	0	0	0	0	0	0	0	0	0	0	0	0	0	0	0	0	0	0	0	0	0	0	0	0	0	0	0	0	0	0	0	0	0	0	0
CSys (ng/mL)	31	5	0	0	0	0	0	0	0	0	0	0	0	0	0	0	0	0	0	0	0	0	0	0	0	0	0	0	0	0	0	0	0	0	0	0	0	0	0	0	0	0	0	0	0	0	0	0	0
CSys (ng/mL)	29	5	0	0	0	0	0	0	0	0	0	0	0	0	0	0	0	0	0	0	0	0	0	0	0	0	0	0	0	0	0	0	0	0	0	0	0	0	0	0	0	0	0	0	0	0	0	0	0
CSys (ng/mL)	61	5	0	0	0	0	0	0	0	0	0	0	0	0	0	0	0	0	0	0	0	0	0	0	0	0	0	0	0	0	0	0	0	0	0	0	0	0	0	0	0	0	0	0	0	0	0	0	0
CSys (ng/mL)	19	6	0	0	0	0	0	0	0	0	0	0	0	0	0	0	0	0	0	0	0	0	0	0	0	0	0	0	0	0	0	0	0	0	0	0	0	0	0	0	0	0	0	0	0	0	0	0	0
CSys (ng/mL)	110	6	0	0	0	0	0	0	0	0	0	0	0	0	0	0	0	0	0	0	0	0	0	0	0	0	0	0	0	0	0	0	0	0	0	0	0	0	0	0	0	0	0	0	0	0	0	0	0
CSys (ng/mL)	27	6	0	0	0	0	0	0	0	0	0	0	0	0	0	0	0	0	0	0	0	0	0	0	0	0	0	0	0	0	0	0	0	0	0	0	0	0	0	0	0	0	0	0	0	0	0	0	0
CSys (ng/mL)	49	6	0	0	0	0	0	0	0	0	0	0	0	0	0	0	0	0	0	0	0	0	0	0	0	0	0	0	0	0	0	0	0	0	0	0	0	0	0	0	0	0	0	0	0	0	0	0	0
CSys (ng/mL)	51	6	0	0	0	0	0	0	0	0	0	0	0	0	0	0	0	0	0	0	0	0	0	0	0	0	0	0	0	0	0	0	0	0	0	0	0	0	0	0	0	0	0	0	0	0	0	0	0
CSys (ng/mL)	65	6	0	0	0	0	0	0	0	0	0	0	0	0	0	0	0	0	0	0	0	0	0	0	0	0	0	0	0	0	0	0	0	0	0	0	0	0	0	0	0	0	0	0	0	0	0	0	0
CSys (ng/mL)	37	6	0	0	0	0	0	0	0	0	0	0	0	0	0	0	0	0	0	0	0	0	0	0	0	0	0	0	0	0	0	0	0	0	0	0	0	0	0	0	0	0	0	0	0	0	0	0	0
CSys (ng/mL)	93	6	0	0	0	0	0	0	0	0	0	0	0	0	0	0	0	0	0	0	0	0	0	0	0	0	0	0	0	0	0	0	0	0	0	0	0	0	0	0	0	0	0	0	0	0	0	0	0
CSys (ng/mL)	70	6	0	0	0	0	0	0	0	0	0	0	0	0	0	0	0	0	0	0	0	0	0	0	0	0	0	0	0	0	0	0	0	0	0	0	0	0	0	0	0	0	0	0	0	0	0	0	0
CSys (ng/mL)	78	6	0	0	0	0	0	0	0	0	0	0	0	0	0	0	0	0	0	0	0	0	0	0	0	0	0	0	0	0	0	0	0	0	0	0	0	0	0	0	0	0	0	0	0	0	0	0	0
CSys (ng/mL)	28	6	0	0	0	0	0	0	0	0	0	0	0	0	0	0	0	0	0	0	0	0	0	0	0	0	0	0	0	0	0	0	0	0	0	0	0	0	0	0	0	0	0	0	0	0	0	0	0
CSys (ng/mL)	35	6	0	0	0	0	0	0	0	0	0	0	0	0	0	0	0	0	0	0	0	0	0	0	0	0	0	0	0	0	0	0	0	0	0	0	0	0	0	0	0	0	0	0	0	0	0	0	0
CSys (ng/mL)	90	6	0	0	0	0	0	0	0	0	0	0	0	0	0	0	0	0	0	0	0	0	0	0	0	0	0	0	0	0	0	0	0	0	0	0	0	0	0	0	0	0	0	0	0	0	0	0	0
CSys (ng/mL)	117	7	0	0	0	0	0	0	0	0	0	0	0	0	0	0	0	0	0	0	0	0	0	0	0	0	0	0	0	0	0	0	0	0	0	0	0	0	0	0	0	0	0	0	0	0	0	0	0
CSys (ng/mL)	67	7	0	0	0	0	0	0	0	0	0	0	0	0	0	0	0	0	0	0	0	0	0	0	0	0	0	0	0	0	0	0	0	0	0	0	0	0	0	0	0	0	0	0	0	0	0	0	0
CSys (ng/mL)	105	7	0	0	0	0	0	0	0	0	0	0	0	0	0	0	0	0	0	0	0	0	0	0	0	0	0	0	0	0	0	0	0	0	0	0	0	0	0	0	0	0	0	0	0	0	0	0	0
CSys (ng/mL)	64	7	0	0	0	0	0	0	0	0	0	0	0	0	0	0	0	0	0	0	0	0	0	0	0	0	0	0	0	0	0	0	0	0	0	0	0	0	0	0	0	0	0	0	0	0	0	0	0
CSys (ng/mL)	114	7	0	0	0	0	0	0	0	0	0	0	0	0	0	0	0	0	0	0	0	0	0	0	0	0	0	0	0	0	0	0	0	0	0	0	0	0	0	0	0	0	0	0	0	0	0	0	0
CSys (ng/mL)	121	7	0	0	0	0	0	0	0	0	0	0	0	0	0	0	0	0	0	0	0	0	0	0	0	0	0	0	0	0	0	0	0	0	0	0	0	0	0	0	0	0	0	0	0	0	0	0	0
CSys (ng/mL)	9	7	0	0	0	0	0	0	0	0	0	0	0	0	0	0	0	0	0	0	0	0	0	0	0	0	0	0	0	0	0	0	0	0	0	0	0	0	0	0	0	0	0	0	0	0	0	0	0
CSys (ng/mL)	38	7	0	0	0	0	0	0	0	0	0	0	0	0	0	0	0	0	0	0	0	0	0	0	0	0	0	0	0	0	0	0	0	0	0	0	0	0	0	0	0	0	0	0	0	0	0	0	0
CSys (ng/mL)	34	7	0	0	0	0	0	0	0	0	0	0	0	0	0	0	0	0	0	0	0	0	0	0	0	0	0	0	0	0	0	0	0	0	0	0	0	0	0	0	0	0	0	0	0	0	0	0	0
CSys (ng/mL)	126	7	0	0	0	0	0	0	0	0	0	0	0	0	0	0	0	0	0	0	0	0	0	0	0	0	0	0	0	0	0	0	0	0	0	0	0	0	0	0	0	0	0	0	0	0	0	0	0
CSys (ng/mL)	43	7	0	0	0	0	0	0	0	0	0	0	0	0	0	0	0	0	0	0	0	0	0	0	0	0	0	0	0	0	0	0	0	0	0	0	0	0	0	0	0	0	0	0	0	0	0	0	0
CSys (ng/mL)	47	7	0	0	0	0	0	0	0	0	0	0	0	0	0	0	0	0	0	0	0	0	0	0	0	0	0	0	0	0	0	0	0	0	0	0	0	0	0	0	0	0	0	0	0	0	0	0	0
CSys (ng/mL)	92	7	0	0	0	0	0	0	0	0	0	0	0	0	0	0	0	0	0	0	0	0	0	0	0	0	0	0	0	0	0	0	0	0	0	0	0	0	0	0	0	0	0	0	0	0	0	0	0
CSys (ng/mL)	79	8	0	0	0	0	0	0	0	0	0	0	0	0	0	0	0	0	0	0	0	0	0	0	0	0	0	0	0	0	0	0	0	0	0	0	0	0	0	0	0	0	0	0	0	0	0	0	0
CSys (ng/mL)	74	8	0	0	0	0	0	0	0	0	0	0	0	0	0	0	0	0	0	0	0	0	0	0	0	0	0	0	0	0	0	0	0	0	0	0	0	0	0	0	0	0	0	0	0	0	0	0	0
CSys (ng/mL)	119	8	0	0	0	0	0	0	0	0	0	0	0	0	0	0	0	0	0	0	0	0	0	0	0	0	0	0	0	0	0	0	0	0	0	0	0	0	0	0	0	0	0	0	0	0	0	0	0
CSys (ng/mL)	54	8	0	0	0	0	0	0	0	0	0	0	0	0	0	0	0	0	0	0	0	0	0	0	0	0	0	0	0	0	0	0	0	0	0	0	0	0	0	0	0	0	0	0	0	0	0	0	0
CSys (ng/mL)	96	8	0	0	0	0	0	0	0	0	0	0	0	0	0	0	0	0	0	0	0	0	0	0	0	0	0	0	0	0	0	0	0	0	0	0	0	0	0	0	0	0	0	0	0	0	0	0	0
CSys (ng/mL)	55	8	0	0	0	0	0	0	0	0	0	0	0	0	0	0	0	0	0	0	0	0	0	0	0	0	0	0	0	0	0	0	0	0	0	0	0	0	0	0	0	0	0	0	0	0	0	0	0
CSys (ng/mL)	10	8	0	0	0	0	0	0	0	0	0	0	0	0	0	0	0	0	0	0	0	0	0	0	0	0	0	0	0	0	0	0	0	0	0	0	0	0	0	0	0	0	0	0	0	0	0	0	0
CSys (ng/mL)	41	8	0	0	0	0	0	0	0	0	0	0	0	0	0	0	0	0	0	0	0	0	0	0	0	0	0	0	0	0	0	0	0	0	0	0	0	0	0	0	0	0	0	0	0	0	0	0	0
CSys (ng/mL)	73	8	0	0	0	0	0	0	0	0	0	0	0	0	0	0	0	0	0	0	0	0	0	0	0	0	0	0	0	0	0	0	0	0	0	0	0	0	0	0	0	0	0	0	0	0	0	0	0
CSys (ng/mL)	101	8	0	0	0	0	0	0	0	0	0	0	0	0	0	0	0	0	0	0	0	0	0	0	0	0	0	0	0	0	0	0	0	0	0	0	0	0	0	0	0	0	0	0	0	0	0	0	0
CSys (ng/mL)	76	8	0	0	0	0	0	0	0	0	0	0	0	0	0	0	0	0	0	0	0	0	0	0	0	0	0	0	0	0	0	0	0	0	0	0	0	0	0	0	0	0	0	0	0	0	0	0	0
CSys (ng/mL)	36	8	0	0	0	0	0	0	0	0	0	0	0	0	0	0	0	0	0	0	0	0	0	0	0	0	0	0	0	0	0	0	0	0	0	0	0	0	0	0	0	0	0	0	0	0	0	0	0
CSys (ng/mL)	86	8	0	0	0	0	0	0	0	0	0	0	0	0	0	0	0	0	0	0	0	0	0	0	0	0	0	0	0	0	0	0	0	0	0	0	0	0	0	0	0	0	0	0	0	0	0	0	0
CSys (ng/mL)	56	9	0	0	0	0	0	0	0	0	0	0	0	0	0	0	0	0	0	0	0	0	0	0	0	0	0	0	0	0	0	0	0	0	0	0	0	0	0	0	0	0	0	0	0	0	0	0	0
CSys (ng/mL)	94	9	0	0	0	0	0	0	0	0	0	0	0	0	0	0	0	0	0	0	0	0	0	0	0	0	0	0	0	0	0	0	0	0	0	0	0	0	0	0	0	0	0	0	0	0	0	0	0
CSys (ng/mL)	52	9	0	0	0	0	0	0	0	0	0	0	0	0	0	0	0	0	0	0	0	0	0	0	0	0	0	0	0	0	0	0	0	0	0	0	0	0	0	0	0	0	0	0	0	0	0	0	0
CSys (ng/mL)	48	9	0	0	0	0	0	0	0	0	0	0	0	0	0	0	0	0	0	0	0	0	0	0	0	0	0	0	0	0	0	0	0	0	0	0	0	0	0	0	0	0	0	0	0	0	0	0	0
CSys (ng/mL)	80	9	0	0	0	0	0	0	0	0	0	0	0	0	0	0	0	0	0	0	0	0	0	0	0	0	0	0	0	0	0	0	0	0	0	0	0	0	0	0	0	0	0	0	0	0	0	0	0
CSys (ng/mL)	26	9	0	0	0	0	0	0	0	0	0	0	0	0	0	0	0	0	0	0	0	0	0	0	0	0	0	0	0	0	0	0	0	0	0	0	0	0	0	0	0	0	0	0	0	0	0	0	0
CSys (ng/mL)	63	9	0	0	0	0	0	0	0	0	0	0	0	0	0	0	0	0	0	0	0	0	0	0	0	0	0	0	0	0	0	0	0	0	0	0	0	0	0	0	0	0	0	0	0	0	0	0	0
CSys (ng/mL)	69	9	0	0	0	0	0	0	0	0	0	0	0	0	0	0	0	0	0	0	0	0	0	0	0	0	0	0	0	0	0	0	0	0	0	0	0	0	0	0	0	0	0	0	0	0	0	0	0
CSys (ng/mL)	83	9	0	0	0	0	0	0	0	0	0	0	0	0	0	0	0	0	0	0	0	0	0	0	0	0	0	0	0	0	0	0	0	0	0	0	0	0	0	0	0	0	0	0	0	0	0	0	0
CSys (ng/mL)	7	9	0	0	0	0	0	0	0	0	0	0	0	0	0	0	0	0	0	0	0	0	0	0	0	0	0	0	0	0	0	0	0	0	0	0	0	0	0	0	0	0	0	0	0	0	0	0	0
CSys (ng/mL)	72	9	0	0	0	0	0	0	0	0	0	0	0	0	0	0	0	0	0	0	0	0	0	0	0	0	0	0	0	0	0	0	0	0	0	0	0	0	0	0	0	0	0	0	0	0	0	0	0
CSys (ng/mL)	59	9	0	0	0	0	0	0	0	0	0	0	0	0	0	0	0	0	0	0	0	0	0	0	0	0	0	0	0	0	0	0	0	0	0	0	0	0	0	0	0	0	0	0	0	0	0	0	0
CSys (ng/mL)	98	9	0	0	0	0	0	0	0	0	0	0	0	0	0	0	0	0	0	0	0	0	0	0	0	0	0	0	0	0	0	0	0	0	0	0	0	0	0	0	0	0	0	0	0	0	0	0	0
CSys (ng/mL)	108	10	0	0	0	0	0	0	0	0	0	0	0	0	0	0	0	0	0	0	0	0	0	0	0	0	0	0	0	0	0	0	0	0	0	0	0	0	0	0	0	0	0	0	0	0	0	0	0
CSys (ng/mL)	106	10	0	0	0	0	0	0	0	0	0	0	0	0	0	0	0	0	0	0	0	0	0	0	0	0	0	0	0	0	0	0	0	0	0	0	0	0	0	0	0	0	0	0	0	0	0	0	0
CSys (ng/mL)	112	10	0	0	0	0	0	0	0	0	0	0	0	0	0	0	0	0	0	0	0	0	0	0	0	0	0	0	0	0	0	0	0	0	0	0	0	0	0	0	0	0	0	0	0	0	0	0	0
CSys (ng/mL)	75	10	0	0	0	0	0	0	0	0	0	0	0	0	0	0	0	0	0	0	0	0	0	0	0	0	0	0	0	0	0	0	0	0	0	0	0	0	0	0	0	0	0	0	0	0	0	0	0
CSys (ng/mL)	5	10	0	0	0	0	0	0	0	0	0	0	0	0	0	0	0	0	0	0	0	0	0	0	0	0	0	0	0	0	0	0	0	0	0	0	0	0	0	0	0	0	0	0	0	0	0	0	0
CSys (ng/mL)	81	10	0	0	0	0	0	0	0	0	0	0	0	0	0	0	0	0	0	0	0	0	0	0	0	0	0	0	0	0	0	0	0	0	0	0	0	0	0	0	0	0	0	0	0	0	0	0	0
CSys (ng/mL)	30	10	0	0	0	0	0	0	0	0	0	0	0	0	0	0	0	0	0	0	0	0	0	0	0	0	0	0	0	0	0	0	0	0	0	0	0	0	0	0	0	0	0	0	0	0	0	0	0
CSys (ng/mL)	87	10	0	0	0	0	0	0	0	0	0	0	0	0	0	0	0	0	0	0	0	0	0	0	0	0	0	0	0	0	0	0	0	0	0	0	0	0	0	0	0	0	0	0	0	0	0	0	0
CSys (ng/mL)	88	10	0	0	0	0	0	0	0	0	0	0	0	0	0	0	0	0	0	0	0	0	0	0	0	0	0	0	0	0	0	0	0	0	0	0	0	0	0	0	0	0	0	0	0	0	0	0	0
CSys (ng/mL)	4	10	0	0	0	0	0	0	0	0	0	0	0	0	0	0	0	0	0	0	0	0	0	0	0	0	0	0	0	0	0	0	0	0	0	0	0	0	0	0	0	0	0	0	0	0	0	0	0
CSys (ng/mL)	20	10	0	0	0	0	0	0	0	0	0	0	0	0	0	0	0	0	0	0	0	0	0	0	0	0	0	0	0	0	0	0	0	0	0	0	0	0	0	0	0	0	0	0	0	0	0	0	0
CSys (ng/mL)	13	10	0	0	0	0	0	0	0	0	0	0	0	0	0	0	0	0	0	0	0	0	0	0	0	0	0	0	0	0	0	0	0	0	0	0	0	0	0	0	0	0	0	0	0	0	0	0	0
CSys (ng/mL)	21	10	0	0	0	0	0	0	0	0	0	0	0	0	0	0	0	0	0	0	0	0	0	0	0	0	0	0	0	0	0	0	0	0	0	0	0	0	0	0	0	0	0	0	0	0	0	0	0
Time (h)			0	1.2	2.4	3.6	4.8	6	7.2	8.4	9.6	10.8	12	13.2	14.4	15.6	16.8	18	19.2	20.4	21.6	22.8	24	25.2	26.4	27.6	28.8	30	31.2	32.4	33.6	34.8	36	37.2	38.4	39.6	40.8	42	43.2	44.4	45.6	46.8	48	49.2	50.4	51.6	52.8	54	55.2
CSys After Inh (ng/mL)	1	1	0	0	0	0	0	0	0	0	0	0	0	0	0	0	0	0	0	0	0	0	0	0	0	0	0	0	0	0	0	0	0	0	0	0	0	0	0	0	0	0	0	0	0	0	0	0	0
CSys After Inh (ng/mL)	109	1	0	0	0	0	0	0	0	0	0	0	0	0	0	0	0	0	0	0	0	0	0	0	0	0	0	0	0	0	0	0	0	0	0	0	0	0	0	0	0	0	0	0	0	0	0	0	0
CSys After Inh (ng/mL)	25	1	0	0	0	0	0	0	0	0	0	0	0	0	0	0	0	0	0	0	0	0	0	0	0	0	0	0	0	0	0	0	0	0	0	0	0	0	0	0	0	0	0	0	0	0	0	0	0
CSys After Inh (ng/mL)	95	1	0	0	0	0	0	0	0	0	0	0	0	0	0	0	0	0	0	0	0	0	0	0	0	0	0	0	0	0	0	0	0	0	0	0	0	0	0	0	0	0	0	0	0	0	0	0	0
CSys After Inh (ng/mL)	53	1	0	0	0	0	0	0	0	0	0	0	0	0	0	0	0	0	0	0	0	0	0	0	0	0	0	0	0	0	0	0	0	0	0	0	0	0	0	0	0	0	0	0	0	0	0	0	0
CSys After Inh (ng/mL)	60	1	0	0	0	0	0	0	0	0	0	0	0	0	0	0	0	0	0	0	0	0	0	0	0	0	0	0	0	0	0	0	0	0	0	0	0	0	0	0	0	0	0	0	0	0	0	0	0
CSys After Inh (ng/mL)	125	1	0	0	0	0	0	0	0	0	0	0	0	0	0	0	0	0	0	0	0	0	0	0	0	0	0	0	0	0	0	0	0	0	0	0	0	0	0	0	0	0	0	0	0	0	0	0	0
CSys After Inh (ng/mL)	8	1	0	0	0	0	0	0	0	0	0	0	0	0	0	0	0	0	0	0	0	0	0	0	0	0	0	0	0	0	0	0	0	0	0	0	0	0	0	0	0	0	0	0	0	0	0	0	0
CSys After Inh (ng/mL)	39	1	0	0	0	0	0	0	0	0	0	0	0	0	0	0	0	0	0	0	0	0	0	0	0	0	0	0	0	0	0	0	0	0	0	0	0	0	0	0	0	0	0	0	0	0	0	0	0
CSys After Inh (ng/mL)	116	1	0	0	0	0	0	0	0	0	0	0	0	0	0	0	0	0	0	0	0	0	0	0	0	0	0	0	0	0	0	0	0	0	0	0	0	0	0	0	0	0	0	0	0	0	0	0	0
CSys After Inh (ng/mL)	111	1	0	0	0	0	0	0	0	0	0	0	0	0	0	0	0	0	0	0	0	0	0	0	0	0	0	0	0	0	0	0	0	0	0	0	0	0	0	0	0	0	0	0	0	0	0	0	0
CSys After Inh (ng/mL)	12	1	0	0	0	0	0	0	0	0	0	0	0	0	0	0	0	0	0	0	0	0	0	0	0	0	0	0	0	0	0	0	0	0	0	0	0	0	0	0	0	0	0	0	0	0	0	0	0
CSys After Inh (ng/mL)	66	1	0	0	0	0	0	0	0	0	0	0	0	0	0	0	0	0	0	0	0	0	0	0	0	0	0	0	0	0	0	0	0	0	0	0	0	0	0	0	0	0	0	0	0	0	0	0	0
CSys After Inh (ng/mL)	2	2	0	0	0	0	0	0	0	0	0	0	0	0	0	0	0	0	0	0	0	0	0	0	0	0	0	0	0	0	0	0	0	0	0	0	0	0	0	0	0	0	0	0	0	0	0	0	0
CSys After Inh (ng/mL)	3	2	0	0	0	0	0	0	0	0	0	0	0	0	0	0	0	0	0	0	0	0	0	0	0	0	0	0	0	0	0	0	0	0	0	0	0	0	0	0	0	0	0	0	0	0	0	0	0
CSys After Inh (ng/mL)	33	2	0	0	0	0	0	0	0	0	0	0	0	0	0	0	0	0	0	0	0	0	0	0	0	0	0	0	0	0	0	0	0	0	0	0	0	0	0	0	0	0	0	0	0	0	0	0	0
CSys After Inh (ng/mL)	18	2	0	0	0	0	0	0	0	0	0	0	0	0	0	0	0	0	0	0	0	0	0	0	0	0	0	0	0	0	0	0	0	0	0	0	0	0	0	0	0	0	0	0	0	0	0	0	0
CSys After Inh (ng/mL)	6	2	0	0	0	0	0	0	0	0	0	0	0	0	0	0	0	0	0	0	0	0	0	0	0	0	0	0	0	0	0	0	0	0	0	0	0	0	0	0	0	0	0	0	0	0	0	0	0
CSys After Inh (ng/mL)	113	2	0	0	0	0	0	0	0	0	0	0	0	0	0	0	0	0	0	0	0	0	0	0	0	0	0	0	0	0	0	0	0	0	0	0	0	0	0	0	0	0	0	0	0	0	0	0	0
CSys After Inh (ng/mL)	82	2	0	0	0	0	0	0	0	0	0	0	0	0	0	0	0	0	0	0	0	0	0	0	0	0	0	0	0	0	0	0	0	0	0	0	0	0	0	0	0	0	0	0	0	0	0	0	0
CSys After Inh (ng/mL)	102	2	0	0	0	0	0	0	0	0	0	0	0	0	0	0	0	0	0	0	0	0	0	0	0	0	0	0	0	0	0	0	0	0	0	0	0	0	0	0	0	0	0	0	0	0	0	0	0
CSys After Inh (ng/mL)	22	2	0	0	0	0	0	0	0	0	0	0	0	0	0	0	0	0	0	0	0	0	0	0	0	0	0	0	0	0	0	0	0	0	0	0	0	0	0	0	0	0	0	0	0	0	0	0	0
CSys After Inh (ng/mL)	107	2	0	0	0	0	0	0	0	0	0	0	0	0	0	0	0	0	0	0	0	0	0	0	0	0	0	0	0	0	0	0	0	0	0	0	0	0	0	0	0	0	0	0	0	0	0	0	0
CSys After Inh (ng/mL)	24	2	0	0	0	0	0	0	0	0	0	0	0	0	0	0	0	0	0	0	0	0	0	0	0	0	0	0	0	0	0	0	0	0	0	0	0	0	0	0	0	0	0	0	0	0	0	0	0
CSys After Inh (ng/mL)	45	2	0	0	0	0	0	0	0	0	0	0	0	0	0	0	0	0	0	0	0	0	0	0	0	0	0	0	0	0	0	0	0	0	0	0	0	0	0	0	0	0	0	0	0	0	0	0	0
CSys After Inh (ng/mL)	58	2	0	0	0	0	0	0	0	0	0	0	0	0	0	0	0	0	0	0	0	0	0	0	0	0	0	0	0	0	0	0	0	0	0	0	0	0	0	0	0	0	0	0	0	0	0	0	0
CSys After Inh (ng/mL)	23	3	0	0	0	0	0	0	0	0	0	0	0	0	0	0	0	0	0	0	0	0	0	0	0	0	0	0	0	0	0	0	0	0	0	0	0	0	0	0	0	0	0	0	0	0	0	0	0
CSys After Inh (ng/mL)	44	3	0	0	0	0	0	0	0	0	0	0	0	0	0	0	0	0	0	0	0	0	0	0	0	0	0	0	0	0	0	0	0	0	0	0	0	0	0	0	0	0	0	0	0	0	0	0	0
CSys After Inh (ng/mL)	50	3	0	0	0	0	0	0	0	0	0	0	0	0	0	0	0	0	0	0	0	0	0	0	0	0	0	0	0	0	0	0	0	0	0	0	0	0	0	0	0	0	0	0	0	0	0	0	0
CSys After Inh (ng/mL)	89	3	0	0	0	0	0	0	0	0	0	0	0	0	0	0	0	0	0	0	0	0	0	0	0	0	0	0	0	0	0	0	0	0	0	0	0	0	0	0	0	0	0	0	0	0	0	0	0
CSys After Inh (ng/mL)	118	3	0	0	0	0	0	0	0	0	0	0	0	0	0	0	0	0	0	0	0	0	0	0	0	0	0	0	0	0	0	0	0	0	0	0	0	0	0	0	0	0	0	0	0	0	0	0	0
CSys After Inh (ng/mL)	99	3	0	0	0	0	0	0	0	0	0	0	0	0	0	0	0	0	0	0	0	0	0	0	0	0	0	0	0	0	0	0	0	0	0	0	0	0	0	0	0	0	0	0	0	0	0	0	0
CSys After Inh (ng/mL)	127	3	0	0	0	0	0	0	0	0	0	0	0	0	0	0	0	0	0	0	0	0	0	0	0	0	0	0	0	0	0	0	0	0	0	0	0	0	0	0	0	0	0	0	0	0	0	0	0
CSys After Inh (ng/mL)	124	3	0	0	0	0	0	0	0	0	0	0	0	0	0	0	0	0	0	0	0	0	0	0	0	0	0	0	0	0	0	0	0	0	0	0	0	0	0	0	0	0	0	0	0	0	0	0	0
CSys After Inh (ng/mL)	15	3	0	0	0	0	0	0	0	0	0	0	0	0	0	0	0	0	0	0	0	0	0	0	0	0	0	0	0	0	0	0	0	0	0	0	0	0	0	0	0	0	0	0	0	0	0	0	0
CSys After Inh (ng/mL)	104	3	0	0	0	0	0	0	0	0	0	0	0	0	0	0	0	0	0	0	0	0	0	0	0	0	0	0	0	0	0	0	0	0	0	0	0	0	0	0	0	0	0	0	0	0	0	0	0
CSys After Inh (ng/mL)	123	3	0	0	0	0	0	0	0	0	0	0	0	0	0	0	0	0	0	0	0	0	0	0	0	0	0	0	0	0	0	0	0	0	0	0	0	0	0	0	0	0	0	0	0	0	0	0	0
CSys After Inh (ng/mL)	40	3	0	0	0	0	0	0	0	0	0	0	0	0	0	0	0	0	0	0	0	0	0	0	0	0	0	0	0	0	0	0	0	0	0	0	0	0	0	0	0	0	0	0	0	0	0	0	0
CSys After Inh (ng/mL)	17	3	0	0	0	0	0	0	0	0	0	0	0	0	0	0	0	0	0	0	0	0	0	0	0	0	0	0	0	0	0	0	0	0	0	0	0	0	0	0	0	0	0	0	0	0	0	0	0
CSys After Inh (ng/mL)	122	4	0	0	0	0	0	0	0	0	0	0	0	0	0	0	0	0	0	0	0	0	0	0	0	0	0	0	0	0	0	0	0	0	0	0	0	0	0	0	0	0	0	0	0	0	0	0	0
CSys After Inh (ng/mL)	120	4	0	0	0	0	0	0	0	0	0	0	0	0	0	0	0	0	0	0	0	0	0	0	0	0	0	0	0	0	0	0	0	0	0	0	0	0	0	0	0	0	0	0	0	0	0	0	0
CSys After Inh (ng/mL)	46	4	0	0	0	0	0	0	0	0	0	0	0	0	0	0	0	0	0	0	0	0	0	0	0	0	0	0	0	0	0	0	0	0	0	0	0	0	0	0	0	0	0	0	0	0	0	0	0
CSys After Inh (ng/mL)	62	4	0	0	0	0	0	0	0	0	0	0	0	0	0	0	0	0	0	0	0	0	0	0	0	0	0	0	0	0	0	0	0	0	0	0	0	0	0	0	0	0	0	0	0	0	0	0	0
CSys After Inh (ng/mL)	14	4	0	0	0	0	0	0	0	0	0	0	0	0	0	0	0	0	0	0	0	0	0	0	0	0	0	0	0	0	0	0	0	0	0	0	0	0	0	0	0	0	0	0	0	0	0	0	0
CSys After Inh (ng/mL)	42	4	0	0	0	0	0	0	0	0	0	0	0	0	0	0	0	0	0	0	0	0	0	0	0	0	0	0	0	0	0	0	0	0	0	0	0	0	0	0	0	0	0	0	0	0	0	0	0
CSys After Inh (ng/mL)	97	4	0	0	0	0	0	0	0	0	0	0	0	0	0	0	0	0	0	0	0	0	0	0	0	0	0	0	0	0	0	0	0	0	0	0	0	0	0	0	0	0	0	0	0	0	0	0	0
CSys After Inh (ng/mL)	115	4	0	0	0	0	0	0	0	0	0	0	0	0	0	0	0	0	0	0	0	0	0	0	0	0	0	0	0	0	0	0	0	0	0	0	0	0	0	0	0	0	0	0	0	0	0	0	0
CSys After Inh (ng/mL)	129	4	0	0	0	0	0	0	0	0	0	0	0	0	0	0	0	0	0	0	0	0	0	0	0	0	0	0	0	0	0	0	0	0	0	0	0	0	0	0	0	0	0	0	0	0	0	0	0
CSys After Inh (ng/mL)	85	4	0	0	0	0	0	0	0	0	0	0	0	0	0	0	0	0	0	0	0	0	0	0	0	0	0	0	0	0	0	0	0	0	0	0	0	0	0	0	0	0	0	0	0	0	0	0	0
CSys After Inh (ng/mL)	68	4	0	0	0	0	0	0	0	0	0	0	0	0	0	0	0	0	0	0	0	0	0	0	0	0	0	0	0	0	0	0	0	0	0	0	0	0	0	0	0	0	0	0	0	0	0	0	0
CSys After Inh (ng/mL)	128	4	0	0	0	0	0	0	0	0	0	0	0	0	0	0	0	0	0	0	0	0	0	0	0	0	0	0	0	0	0	0	0	0	0	0	0	0	0	0	0	0	0	0	0	0	0	0	0
CSys After Inh (ng/mL)	100	4	0	0	0	0	0	0	0	0	0	0	0	0	0	0	0	0	0	0	0	0	0	0	0	0	0	0	0	0	0	0	0	0	0	0	0	0	0	0	0	0	0	0	0	0	0	0	0
CSys After Inh (ng/mL)	11	5	0	0	0	0	0	0	0	0	0	0	0	0	0	0	0	0	0	0	0	0	0	0	0	0	0	0	0	0	0	0	0	0	0	0	0	0	0	0	0	0	0	0	0	0	0	0	0
CSys After Inh (ng/mL)	16	5	0	0	0	0	0	0	0	0	0	0	0	0	0	0	0	0	0	0	0	0	0	0	0	0	0	0	0	0	0	0	0	0	0	0	0	0	0	0	0	0	0	0	0	0	0	0	0
CSys After Inh (ng/mL)	84	5	0	0	0	0	0	0	0	0	0	0	0	0	0	0	0	0	0	0	0	0	0	0	0	0	0	0	0	0	0	0	0	0	0	0	0	0	0	0	0	0	0	0	0	0	0	0	0
CSys After Inh (ng/mL)	32	5	0	0	0	0	0	0	0	0	0	0	0	0	0	0	0	0	0	0	0	0	0	0	0	0	0	0	0	0	0	0	0	0	0	0	0	0	0	0	0	0	0	0	0	0	0	0	0
CSys After Inh (ng/mL)	77	5	0	0	0	0	0	0	0	0	0	0	0	0	0	0	0	0	0	0	0	0	0	0	0	0	0	0	0	0	0	0	0	0	0	0	0	0	0	0	0	0	0	0	0	0	0	0	0
CSys After Inh (ng/mL)	130	5	0	0	0	0	0	0	0	0	0	0	0	0	0	0	0	0	0	0	0	0	0	0	0	0	0	0	0	0	0	0	0	0	0	0	0	0	0	0	0	0	0	0	0	0	0	0	0
CSys After Inh (ng/mL)	103	5	0	0	0	0	0	0	0	0	0	0	0	0	0	0	0	0	0	0	0	0	0	0	0	0	0	0	0	0	0	0	0	0	0	0	0	0	0	0	0	0	0	0	0	0	0	0	0
CSys After Inh (ng/mL)	57	5	0	0	0	0	0	0	0	0	0	0	0	0	0	0	0	0	0	0	0	0	0	0	0	0	0	0	0	0	0	0	0	0	0	0	0	0	0	0	0	0	0	0	0	0	0	0	0
CSys After Inh (ng/mL)	91	5	0	0	0	0	0	0	0	0	0	0	0	0	0	0	0	0	0	0	0	0	0	0	0	0	0	0	0	0	0	0	0	0	0	0	0	0	0	0	0	0	0	0	0	0	0	0	0
CSys After Inh (ng/mL)	71	5	0	0	0	0	0	0	0	0	0	0	0	0	0	0	0	0	0	0	0	0	0	0	0	0	0	0	0	0	0	0	0	0	0	0	0	0	0	0	0	0	0	0	0	0	0	0	0
CSys After Inh (ng/mL)	31	5	0	0	0	0	0	0	0	0	0	0	0	0	0	0	0	0	0	0	0	0	0	0	0	0	0	0	0	0	0	0	0	0	0	0	0	0	0	0	0	0	0	0	0	0	0	0	0
CSys After Inh (ng/mL)	29	5	0	0	0	0	0	0	0	0	0	0	0	0	0	0	0	0	0	0	0	0	0	0	0	0	0	0	0	0	0	0	0	0	0	0	0	0	0	0	0	0	0	0	0	0	0	0	0
CSys After Inh (ng/mL)	61	5	0	0	0	0	0	0	0	0	0	0	0	0	0	0	0	0	0	0	0	0	0	0	0	0	0	0	0	0	0	0	0	0	0	0	0	0	0	0	0	0	0	0	0	0	0	0	0
CSys After Inh (ng/mL)	19	6	0	0	0	0	0	0	0	0	0	0	0	0	0	0	0	0	0	0	0	0	0	0	0	0	0	0	0	0	0	0	0	0	0	0	0	0	0	0	0	0	0	0	0	0	0	0	0
CSys After Inh (ng/mL)	110	6	0	0	0	0	0	0	0	0	0	0	0	0	0	0	0	0	0	0	0	0	0	0	0	0	0	0	0	0	0	0	0	0	0	0	0	0	0	0	0	0	0	0	0	0	0	0	0
CSys After Inh (ng/mL)	27	6	0	0	0	0	0	0	0	0	0	0	0	0	0	0	0	0	0	0	0	0	0	0	0	0	0	0	0	0	0	0	0	0	0	0	0	0	0	0	0	0	0	0	0	0	0	0	0
CSys After Inh (ng/mL)	49	6	0	0	0	0	0	0	0	0	0	0	0	0	0	0	0	0	0	0	0	0	0	0	0	0	0	0	0	0	0	0	0	0	0	0	0	0	0	0	0	0	0	0	0	0	0	0	0
CSys After Inh (ng/mL)	51	6	0	0	0	0	0	0	0	0	0	0	0	0	0	0	0	0	0	0	0	0	0	0	0	0	0	0	0	0	0	0	0	0	0	0	0	0	0	0	0	0	0	0	0	0	0	0	0
CSys After Inh (ng/mL)	65	6	0	0	0	0	0	0	0	0	0	0	0	0	0	0	0	0	0	0	0	0	0	0	0	0	0	0	0	0	0	0	0	0	0	0	0	0	0	0	0	0	0	0	0	0	0	0	0
CSys After Inh (ng/mL)	37	6	0	0	0	0	0	0	0	0	0	0	0	0	0	0	0	0	0	0	0	0	0	0	0	0	0	0	0	0	0	0	0	0	0	0	0	0	0	0	0	0	0	0	0	0	0	0	0
CSys After Inh (ng/mL)	93	6	0	0	0	0	0	0	0	0	0	0	0	0	0	0	0	0	0	0	0	0	0	0	0	0	0	0	0	0	0	0	0	0	0	0	0	0	0	0	0	0	0	0	0	0	0	0	0
CSys After Inh (ng/mL)	70	6	0	0	0	0	0	0	0	0	0	0	0	0	0	0	0	0	0	0	0	0	0	0	0	0	0	0	0	0	0	0	0	0	0	0	0	0	0	0	0	0	0	0	0	0	0	0	0
CSys After Inh (ng/mL)	78	6	0	0	0	0	0	0	0	0	0	0	0	0	0	0	0	0	0	0	0	0	0	0	0	0	0	0	0	0	0	0	0	0	0	0	0	0	0	0	0	0	0	0	0	0	0	0	0
CSys After Inh (ng/mL)	28	6	0	0	0	0	0	0	0	0	0	0	0	0	0	0	0	0	0	0	0	0	0	0	0	0	0	0	0	0	0	0	0	0	0	0	0	0	0	0	0	0	0	0	0	0	0	0	0
CSys After Inh (ng/mL)	35	6	0	0	0	0	0	0	0	0	0	0	0	0	0	0	0	0	0	0	0	0	0	0	0	0	0	0	0	0	0	0	0	0	0	0	0	0	0	0	0	0	0	0	0	0	0	0	0
CSys After Inh (ng/mL)	90	6	0	0	0	0	0	0	0	0	0	0	0	0	0	0	0	0	0	0	0	0	0	0	0	0	0	0	0	0	0	0	0	0	0	0	0	0	0	0	0	0	0	0	0	0	0	0	0
CSys After Inh (ng/mL)	117	7	0	0	0	0	0	0	0	0	0	0	0	0	0	0	0	0	0	0	0	0	0	0	0	0	0	0	0	0	0	0	0	0	0	0	0	0	0	0	0	0	0	0	0	0	0	0	0
CSys After Inh (ng/mL)	67	7	0	0	0	0	0	0	0	0	0	0	0	0	0	0	0	0	0	0	0	0	0	0	0	0	0	0	0	0	0	0	0	0	0	0	0	0	0	0	0	0	0	0	0	0	0	0	0
CSys After Inh (ng/mL)	105	7	0	0	0	0	0	0	0	0	0	0	0	0	0	0	0	0	0	0	0	0	0	0	0	0	0	0	0	0	0	0	0	0	0	0	0	0	0	0	0	0	0	0	0	0	0	0	0
CSys After Inh (ng/mL)	64	7	0	0	0	0	0	0	0	0	0	0	0	0	0	0	0	0	0	0	0	0	0	0	0	0	0	0	0	0	0	0	0	0	0	0	0	0	0	0	0	0	0	0	0	0	0	0	0
CSys After Inh (ng/mL)	114	7	0	0	0	0	0	0	0	0	0	0	0	0	0	0	0	0	0	0	0	0	0	0	0	0	0	0	0	0	0	0	0	0	0	0	0	0	0	0	0	0	0	0	0	0	0	0	0
CSys After Inh (ng/mL)	121	7	0	0	0	0	0	0	0	0	0	0	0	0	0	0	0	0	0	0	0	0	0	0	0	0	0	0	0	0	0	0	0	0	0	0	0	0	0	0	0	0	0	0	0	0	0	0	0
CSys After Inh (ng/mL)	9	7	0	0	0	0	0	0	0	0	0	0	0	0	0	0	0	0	0	0	0	0	0	0	0	0	0	0	0	0	0	0	0	0	0	0	0	0	0	0	0	0	0	0	0	0	0	0	0
CSys After Inh (ng/mL)	38	7	0	0	0	0	0	0	0	0	0	0	0	0	0	0	0	0	0	0	0	0	0	0	0	0	0	0	0	0	0	0	0	0	0	0	0	0	0	0	0	0	0	0	0	0	0	0	0
CSys After Inh (ng/mL)	34	7	0	0	0	0	0	0	0	0	0	0	0	0	0	0	0	0	0	0	0	0	0	0	0	0	0	0	0	0	0	0	0	0	0	0	0	0	0	0	0	0	0	0	0	0	0	0	0
CSys After Inh (ng/mL)	126	7	0	0	0	0	0	0	0	0	0	0	0	0	0	0	0	0	0	0	0	0	0	0	0	0	0	0	0	0	0	0	0	0	0	0	0	0	0	0	0	0	0	0	0	0	0	0	0
CSys After Inh (ng/mL)	43	7	0	0	0	0	0	0	0	0	0	0	0	0	0	0	0	0	0	0	0	0	0	0	0	0	0	0	0	0	0	0	0	0	0	0	0	0	0	0	0	0	0	0	0	0	0	0	0
CSys After Inh (ng/mL)	47	7	0	0	0	0	0	0	0	0	0	0	0	0	0	0	0	0	0	0	0	0	0	0	0	0	0	0	0	0	0	0	0	0	0	0	0	0	0	0	0	0	0	0	0	0	0	0	0
CSys After Inh (ng/mL)	92	7	0	0	0	0	0	0	0	0	0	0	0	0	0	0	0	0	0	0	0	0	0	0	0	0	0	0	0	0	0	0	0	0	0	0	0	0	0	0	0	0	0	0	0	0	0	0	0
CSys After Inh (ng/mL)	79	8	0	0	0	0	0	0	0	0	0	0	0	0	0	0	0	0	0	0	0	0	0	0	0	0	0	0	0	0	0	0	0	0	0	0	0	0	0	0	0	0	0	0	0	0	0	0	0
CSys After Inh (ng/mL)	74	8	0	0	0	0	0	0	0	0	0	0	0	0	0	0	0	0	0	0	0	0	0	0	0	0	0	0	0	0	0	0	0	0	0	0	0	0	0	0	0	0	0	0	0	0	0	0	0
CSys After Inh (ng/mL)	119	8	0	0	0	0	0	0	0	0	0	0	0	0	0	0	0	0	0	0	0	0	0	0	0	0	0	0	0	0	0	0	0	0	0	0	0	0	0	0	0	0	0	0	0	0	0	0	0
CSys After Inh (ng/mL)	54	8	0	0	0	0	0	0	0	0	0	0	0	0	0	0	0	0	0	0	0	0	0	0	0	0	0	0	0	0	0	0	0	0	0	0	0	0	0	0	0	0	0	0	0	0	0	0	0
CSys After Inh (ng/mL)	96	8	0	0	0	0	0	0	0	0	0	0	0	0	0	0	0	0	0	0	0	0	0	0	0	0	0	0	0	0	0	0	0	0	0	0	0	0	0	0	0	0	0	0	0	0	0	0	0
CSys After Inh (ng/mL)	55	8	0	0	0	0	0	0	0	0	0	0	0	0	0	0	0	0	0	0	0	0	0	0	0	0	0	0	0	0	0	0	0	0	0	0	0	0	0	0	0	0	0	0	0	0	0	0	0
CSys After Inh (ng/mL)	10	8	0	0	0	0	0	0	0	0	0	0	0	0	0	0	0	0	0	0	0	0	0	0	0	0	0	0	0	0	0	0	0	0	0	0	0	0	0	0	0	0	0	0	0	0	0	0	0
CSys After Inh (ng/mL)	41	8	0	0	0	0	0	0	0	0	0	0	0	0	0	0	0	0	0	0	0	0	0	0	0	0	0	0	0	0	0	0	0	0	0	0	0	0	0	0	0	0	0	0	0	0	0	0	0
CSys After Inh (ng/mL)	73	8	0	0	0	0	0	0	0	0	0	0	0	0	0	0	0	0	0	0	0	0	0	0	0	0	0	0	0	0	0	0	0	0	0	0	0	0	0	0	0	0	0	0	0	0	0	0	0
CSys After Inh (ng/mL)	101	8	0	0	0	0	0	0	0	0	0	0	0	0	0	0	0	0	0	0	0	0	0	0	0	0	0	0	0	0	0	0	0	0	0	0	0	0	0	0	0	0	0	0	0	0	0	0	0
CSys After Inh (ng/mL)	76	8	0	0	0	0	0	0	0	0	0	0	0	0	0	0	0	0	0	0	0	0	0	0	0	0	0	0	0	0	0	0	0	0	0	0	0	0	0	0	0	0	0	0	0	0	0	0	0
CSys After Inh (ng/mL)	36	8	0	0	0	0	0	0	0	0	0	0	0	0	0	0	0	0	0	0	0	0	0	0	0	0	0	0	0	0	0	0	0	0	0	0	0	0	0	0	0	0	0	0	0	0	0	0	0
CSys After Inh (ng/mL)	86	8	0	0	0	0	0	0	0	0	0	0	0	0	0	0	0	0	0	0	0	0	0	0	0	0	0	0	0	0	0	0	0	0	0	0	0	0	0	0	0	0	0	0	0	0	0	0	0
CSys After Inh (ng/mL)	56	9	0	0	0	0	0	0	0	0	0	0	0	0	0	0	0	0	0	0	0	0	0	0	0	0	0	0	0	0	0	0	0	0	0	0	0	0	0	0	0	0	0	0	0	0	0	0	0
CSys After Inh (ng/mL)	94	9	0	0	0	0	0	0	0	0	0	0	0	0	0	0	0	0	0	0	0	0	0	0	0	0	0	0	0	0	0	0	0	0	0	0	0	0	0	0	0	0	0	0	0	0	0	0	0
CSys After Inh (ng/mL)	52	9	0	0	0	0	0	0	0	0	0	0	0	0	0	0	0	0	0	0	0	0	0	0	0	0	0	0	0	0	0	0	0	0	0	0	0	0	0	0	0	0	0	0	0	0	0	0	0
CSys After Inh (ng/mL)	48	9	0	0	0	0	0	0	0	0	0	0	0	0	0	0	0	0	0	0	0	0	0	0	0	0	0	0	0	0	0	0	0	0	0	0	0	0	0	0	0	0	0	0	0	0	0	0	0
CSys After Inh (ng/mL)	80	9	0	0	0	0	0	0	0	0	0	0	0	0	0	0	0	0	0	0	0	0	0	0	0	0	0	0	0	0	0	0	0	0	0	0	0	0	0	0	0	0	0	0	0	0	0	0	0
CSys After Inh (ng/mL)	26	9	0	0	0	0	0	0	0	0	0	0	0	0	0	0	0	0	0	0	0	0	0	0	0	0	0	0	0	0	0	0	0	0	0	0	0	0	0	0	0	0	0	0	0	0	0	0	0
CSys After Inh (ng/mL)	63	9	0	0	0	0	0	0	0	0	0	0	0	0	0	0	0	0	0	0	0	0	0	0	0	0	0	0	0	0	0	0	0	0	0	0	0	0	0	0	0	0	0	0	0	0	0	0	0
CSys After Inh (ng/mL)	69	9	0	0	0	0	0	0	0	0	0	0	0	0	0	0	0	0	0	0	0	0	0	0	0	0	0	0	0	0	0	0	0	0	0	0	0	0	0	0	0	0	0	0	0	0	0	0	0
CSys After Inh (ng/mL)	83	9	0	0	0	0	0	0	0	0	0	0	0	0	0	0	0	0	0	0	0	0	0	0	0	0	0	0	0	0	0	0	0	0	0	0	0	0	0	0	0	0	0	0	0	0	0	0	0
CSys After Inh (ng/mL)	7	9	0	0	0	0	0	0	0	0	0	0	0	0	0	0	0	0	0	0	0	0	0	0	0	0	0	0	0	0	0	0	0	0	0	0	0	0	0	0	0	0	0	0	0	0	0	0	0
CSys After Inh (ng/mL)	72	9	0	0	0	0	0	0	0	0	0	0	0	0	0	0	0	0	0	0	0	0	0	0	0	0	0	0	0	0	0	0	0	0	0	0	0	0	0	0	0	0	0	0	0	0	0	0	0
CSys After Inh (ng/mL)	59	9	0	0	0	0	0	0	0	0	0	0	0	0	0	0	0	0	0	0	0	0	0	0	0	0	0	0	0	0	0	0	0	0	0	0	0	0	0	0	0	0	0	0	0	0	0	0	0
CSys After Inh (ng/mL)	98	9	0	0	0	0	0	0	0	0	0	0	0	0	0	0	0	0	0	0	0	0	0	0	0	0	0	0	0	0	0	0	0	0	0	0	0	0	0	0	0	0	0	0	0	0	0	0	0
CSys After Inh (ng/mL)	108	10	0	0	0	0	0	0	0	0	0	0	0	0	0	0	0	0	0	0	0	0	0	0	0	0	0	0	0	0	0	0	0	0	0	0	0	0	0	0	0	0	0	0	0	0	0	0	0
CSys After Inh (ng/mL)	106	10	0	0	0	0	0	0	0	0	0	0	0	0	0	0	0	0	0	0	0	0	0	0	0	0	0	0	0	0	0	0	0	0	0	0	0	0	0	0	0	0	0	0	0	0	0	0	0
CSys After Inh (ng/mL)	112	10	0	0	0	0	0	0	0	0	0	0	0	0	0	0	0	0	0	0	0	0	0	0	0	0	0	0	0	0	0	0	0	0	0	0	0	0	0	0	0	0	0	0	0	0	0	0	0
CSys After Inh (ng/mL)	75	10	0	0	0	0	0	0	0	0	0	0	0	0	0	0	0	0	0	0	0	0	0	0	0	0	0	0	0	0	0	0	0	0	0	0	0	0	0	0	0	0	0	0	0	0	0	0	0
CSys After Inh (ng/mL)	5	10	0	0	0	0	0	0	0	0	0	0	0	0	0	0	0	0	0	0	0	0	0	0	0	0	0	0	0	0	0	0	0	0	0	0	0	0	0	0	0	0	0	0	0	0	0	0	0
CSys After Inh (ng/mL)	81	10	0	0	0	0	0	0	0	0	0	0	0	0	0	0	0	0	0	0	0	0	0	0	0	0	0	0	0	0	0	0	0	0	0	0	0	0	0	0	0	0	0	0	0	0	0	0	0
CSys After Inh (ng/mL)	30	10	0	0	0	0	0	0	0	0	0	0	0	0	0	0	0	0	0	0	0	0	0	0	0	0	0	0	0	0	0	0	0	0	0	0	0	0	0	0	0	0	0	0	0	0	0	0	0
CSys After Inh (ng/mL)	87	10	0	0	0	0	0	0	0	0	0	0	0	0	0	0	0	0	0	0	0	0	0	0	0	0	0	0	0	0	0	0	0	0	0	0	0	0	0	0	0	0	0	0	0	0	0	0	0
CSys After Inh (ng/mL)	88	10	0	0	0	0	0	0	0	0	0	0	0	0	0	0	0	0	0	0	0	0	0	0	0	0	0	0	0	0	0	0	0	0	0	0	0	0	0	0	0	0	0	0	0	0	0	0	0
CSys After Inh (ng/mL)	4	10	0	0	0	0	0	0	0	0	0	0	0	0	0	0	0	0	0	0	0	0	0	0	0	0	0	0	0	0	0	0	0	0	0	0	0	0	0	0	0	0	0	0	0	0	0	0	0
CSys After Inh (ng/mL)	20	10	0	0	0	0	0	0	0	0	0	0	0	0	0	0	0	0	0	0	0	0	0	0	0	0	0	0	0	0	0	0	0	0	0	0	0	0	0	0	0	0	0	0	0	0	0	0	0
CSys After Inh (ng/mL)	13	10	0	0	0	0	0	0	0	0	0	0	0	0	0	0	0	0	0	0	0	0	0	0	0	0	0	0	0	0	0	0	0	0	0	0	0	0	0	0	0	0	0	0	0	0	0	0	0
CSys After Inh (ng/mL)	21	10	0	0	0	0	0	0	0	0	0	0	0	0	0	0	0	0	0	0	0	0	0	0	0	0	0	0	0	0	0	0	0	0	0	0	0	0	0	0	0	0	0	0	0	0	0	0	0
Time (h)			0	1.2	2.4	3.6	4.8	6	7.2	8.4	9.6	10.8	12	13.2	14.4	15.6	16.8	18	19.2	20.4	21.6	22.8	24	25.2	26.4	27.6	28.8	30	31.2	32.4	33.6	34.8	36	37.2	38.4	39.6	40.8	42	43.2	44.4	45.6	46.8	48	49.2	50.4	51.6	52.8	54	55.2
ISys 1 (ng/mL)	1	1	0	12.2604	19.7597	17.2236	22.1817	39.3751	43.8765	52.0953	67.8821	70.2383	65.4906	57.4373	50.475	45.8003	42.7992	40.5985	38.8619	37.4551	36.3115	35.3908	31.011	76.5574	112.796	104.246	117.815	180.369	195.839	217.109	259.375	260.898	241.301	213.743	189.927	172.652	160.148	150.112	141.65	134.392	128.139	122.753	112.511	217.265	240.746	208.666	226.175	322.551	344.824
ISys 1 (ng/mL)	109	1	0	6.08088	9.69354	8.89127	12.0627	24.2205	26.1277	31.1257	41.1815	41.5409	37.243	30.9284	25.7704	22.5002	20.5135	19.1175	18.0473	17.1982	16.5196	15.9814	12.2654	49.8722	63.43	55.781	65.6375	109.712	126.033	140.521	170.19	167.28	148.76	125.137	105.893	92.8264	84.0264	77.4115	72.1436	67.8564	64.3478	57.5427	51.446	134.73	144.618	125.002	140.388	218.941	232.13
ISys 1 (ng/mL)	25	1	0	3.63664	5.41636	4.85318	6.23288	10.2362	12.509	14.3644	17.1297	16.1878	13.7807	10.8802	8.54988	6.99786	5.9994	5.31333	4.8246	4.47071	4.21341	4.02762	3.61632	14.599	19.1289	17.017	19.62	34.3681	33.3461	44.9467	53.0448	50.3474	43.2148	34.5153	27.4403	22.6345	19.4546	17.2024	15.5494	14.3154	13.3874	12.6893	11.4066	47.6174	43.1549	34.067	35.574	67.6423	75.9468
ISys 1 (ng/mL)	95	1	0	13.2621	7.84581	5.86642	11.9136	25.138	27.5669	32.8585	41.9498	41.0363	36.5383	30.8538	26.4939	23.7815	22.0618	20.7602	19.675	16.8082	13.8546	11.9622	10.535	55.4714	50.9554	40.0328	52.0025	87.5943	93.1528	106.394	130.736	128.008	115.193	99.0758	86.4905	78.3635	72.9725	68.7618	65.183	60.1157	51.578	44.585	39.5802	136.664	123.256	99.1976	119.128	187.124	198.755
ISys 1 (ng/mL)	53	1	0	3.64867	7.60586	8.88008	13.0757	24.2435	29.7223	35.1048	46.5535	45.8773	40.7248	34.5078	29.4759	26.0395	23.7264	21.9923	20.6181	19.5084	18.6106	17.8902	16.6834	36.4933	45.8168	46.4287	53.9989	94.4621	110.754	125.02	153.981	156.061	141.387	122.727	107.169	95.9945	87.9419	81.5353	76.1945	71.6724	64.7056	58.9438	53.8781	72.6917	98.122	105.187	124.311	189.51	218.335
ISys 1 (ng/mL)	60	1	0	4.37492	7.16013	7.06507	9.11155	15.8524	19.1907	21.4126	25.625	24.2585	20.7891	16.6351	13.3428	11.1757	9.76328	8.7526	7.99739	7.4239	6.98684	5.4812	4.04968	17.8832	26.1424	24.3882	28.7007	49.3709	54.4655	61.8743	76.8894	72.7592	62.5834	50.6363	41.0812	34.6171	30.2565	27.0437	24.5805	22.6622	19.4889	16.8564	14.5736	41.1231	54.4826	50.7535	58.3638	94.737	105.19
ISys 1 (ng/mL)	125	1	0	1.78209	3.96018	5.9195	9.73305	16.3907	17.4906	19.916	24.9223	24.7118	21.9826	18.1965	15.0195	12.8761	11.487	10.4983	9.75586	9.1868	8.75026	8.41978	7.72139	12.5424	21.0883	29.1246	43.786	71.9021	76.2683	84.2377	102.03	101.512	91.3042	77.1756	64.9978	56.291	50.1973	45.5545	41.8529	38.8488	36.3992	34.4059	31.5509	39.876	57.0491	73.9113	101.289	128.042	140.985
ISys 1 (ng/mL)	8	1	0	2.41631	4.77609	5.60495	7.5861	14.1962	18.5665	20.2945	24.3345	23.3215	20.3547	16.7303	13.8772	12.0322	10.8431	9.97438	9.30129	8.76895	8.34637	8.01295	7.32031	15.1458	22.7189	24.6998	30.7769	59.1737	63.9983	70.2535	84.819	82.7039	73.4169	61.6713	52.1578	45.7206	41.3387	37.9824	35.2699	33.0343	31.1797	29.6403	27.1989	45.042	56.538	58.417	64.7446	101.344	121.301
ISys 1 (ng/mL)	39	1	0	5.47596	9.62874	10.3225	13.3449	15.4688	16.9463	18.4253	19.9285	21.4521	23.0059	24.5966	26.2268	27.8886	27.1141	21.4639	18.5932	16.9047	15.7631	14.9412	13.6673	49.142	57.4826	51.8407	49.6455	49.8618	50.5912	51.5946	52.7288	53.9097	55.0974	56.2691	57.411	58.5146	59.5747	60.5881	61.5536	62.4709	63.3406	64.164	64.9418	121.002	140.87	127.586	110.386	102.104	96.8011
ISys 1 (ng/mL)	116	1	0	20.4138	13.2976	8.90487	13.5293	25.9241	27.8085	32.2246	40.6133	39.6936	35.2598	29.7319	25.4886	22.8508	21.1883	19.9355	18.8896	15.0329	12.7432	11.2244	10.037	58.5131	57.5873	42.6064	51.3652	85.8515	91.4349	102.854	125.593	123.172	110.565	94.9412	82.6817	74.6662	69.2848	65.0433	61.4534	55.2407	46.7485	41.1856	37.0876	129.896	118.9	89.8484	103.473	161.026	169.238
ISys 1 (ng/mL)	111	1	0	6.01491	11.2556	12.2226	16.7293	33.2148	35.0223	40.2891	51.2253	50.7988	45.5137	38.4045	32.8663	29.5261	27.5907	26.2586	25.2342	24.4067	23.728	23.1733	20.8092	64.3345	72.7023	66.6516	82.8694	130.42	137.187	151.406	180.999	176.28	157.492	134.688	116.848	105.275	97.7225	92.0123	87.3207	83.3243	79.8715	72.5996	62.3166	131.364	146.296	135.054	154.457	226.786	245.616
ISys 1 (ng/mL)	12	1	0	4.41173	7.74133	8.10649	10.6392	20.038	22.9894	25.9369	32.1866	31.9994	28.9997	24.9124	21.5655	19.3151	17.7942	16.6104	15.6184	14.7638	14.0224	13.3808	12.3328	26.5877	38.2829	38.4713	44.8997	74.6522	84.4665	93.6391	113.408	113.526	104.22	91.2997	80.4512	72.8141	67.331	62.8399	58.9217	55.4281	52.2964	49.4924	45.7027	83.4933	97.0563	90.7549	102.875	154.039	165.386
ISys 1 (ng/mL)	66	1	0	4.43566	8.53868	9.04242	12.1588	22.3219	28.5399	35.0247	43.2246	42.5408	38.025	32.1774	27.5111	24.503	22.6301	21.2969	20.2528	19.3948	18.675	18.0674	16.9353	32.7601	49.3464	50.6962	59.337	93.0226	114.132	131.926	155.55	152.895	137.941	119.11	103.924	93.672	86.7694	81.4964	77.1459	73.4292	70.2066	67.3959	63.3878	101.893	123.548	120.343	131.717	186.669	225.927
ISys 1 (ng/mL)	2	2	0	5.13111	9.29086	9.61722	9.39884	6.89914	6.02915	5.60538	5.38305	5.26595	5.20886	5.18864	5.19261	5.21316	5.24539	5.2859	5.3323	5.3828	5.43606	5.49117	5.54742	26.2654	34.3485	32.2375	26.0264	19.4094	16.1167	14.4334	13.3313	12.5544	11.9798	11.5402	11.1959	10.9211	10.698	10.514	10.3598	10.2285	10.1149	10.0152	9.92638	39.4943	64.7612	66.716	77.245	60.8644	43.5577
ISys 1 (ng/mL)	3	2	0	6.0716	7.09587	6.18507	8.00005	15.8598	18.0464	20.529	25.7454	25.1231	22.2582	18.5832	15.7259	13.9334	12.7921	11.9368	11.2433	10.6648	8.38157	6.79932	5.78753	21.7188	32.4835	31.3043	37.1512	60.6729	72.4215	87.587	104.57	101.531	90.4959	76.7638	65.8978	58.6918	53.756	49.8479	46.5462	43.6927	40.6199	33.4723	28.2208	62.782	83.5413	78.4698	87.4863	122.018	159.286
ISys 1 (ng/mL)	33	2	0	9.47015	8.578	6.62977	10.9699	20.7536	22.1165	26.2528	33.8948	32.8365	28.4598	23.0073	18.8907	16.4241	14.951	13.9101	13.0998	12.442	11.8996	11.4512	10.4143	38.084	46.683	39.5541	47.8281	84.8362	89.1736	100.618	124.245	119.385	103.524	84.6836	70.3497	61.3134	55.5015	51.1695	47.6808	44.7772	42.3276	40.2501	36.7423	88.7004	104.833	89.8574	101.362	166.6	175.299
ISys 1 (ng/mL)	18	2	0	5.62375	9.14272	8.94738	12.8583	22.1842	23.0382	26.0374	32.0384	30.2288	25.5071	19.9922	15.768	13.1273	11.5232	10.4472	9.68001	9.11491	8.69148	8.37215	7.60722	30.1033	34.2093	29.561	38.1068	62.3417	64.957	72.7438	88.4542	83.8921	71.4215	56.7911	45.4568	38.1855	33.5983	30.4111	28.0684	26.2932	24.9239	23.8563	21.7894	65.259	66.2947	56.2012	70.2665	113.317	117.611
ISys 1 (ng/mL)	6	2	0	3.35486	7.48774	8.8584	12.1452	23.4524	30.2343	33.5357	41.4665	40.7302	36.0915	29.9452	25.0595	22.0329	20.2985	19.1852	18.4175	17.877	16.2612	12.7664	10.7571	24.7704	44.8247	53.8447	68.0899	111.121	147.311	170.281	198.236	193.37	172.64	146.887	125.931	111.75	102.377	95.4837	90.0878	85.7489	82.2225	72.8096	62.9519	95.2434	130.939	141.074	161.515	252.467	295.348
ISys 1 (ng/mL)	113	2	0	12.2761	23.3035	24.089	33.1362	57.3974	62.339	72.3574	91.7271	92.1135	83.6332	71.7395	62.0661	55.7833	51.7819	48.8464	46.5088	44.5791	42.9632	41.6045	39.0972	88.9133	117.312	111.551	131.715	201.106	214.891	238.307	285.124	282.884	257.765	224.883	197.935	179.577	167.074	157.461	149.571	142.906	137.201	132.29	124.992	237.156	256.5	231.023	259.604	371.16	392.225
ISys 1 (ng/mL)	82	2	0	3.92547	6.83769	6.66298	8.53652	17.4007	18.6254	21.0131	26.704	25.9908	22.6754	18.4301	15.1831	13.2732	12.2122	11.5212	11.0262	10.6607	10.393	10.2051	9.45994	32.3808	41.5027	39.4999	46.8027	83.0133	97.2959	109.552	133.263	130.505	115.535	96.7459	81.878	72.2551	66.0978	61.5749	57.9917	55.0708	52.6704	50.7001	47.3341	77.7008	108.319	107.996	117.96	179.512	208.235
ISys 1 (ng/mL)	102	2	0	5.40699	7.6051	7.71744	10.6691	18.1783	19.0937	21.6652	26.8868	25.9822	22.5683	18.2915	14.8369	12.5283	11.0095	9.90632	9.06784	8.42107	7.92196	6.4242	4.72064	18.3788	27.8167	28.7096	36.3759	56.9135	59.1754	65.5394	79.4111	76.7947	67.1157	55.105	45.2766	38.503	33.8744	30.4089	27.7062	25.5693	23.8754	20.5952	15.6573	41.6275	56.555	56.7005	66.1443	104.618	107.337
ISys 1 (ng/mL)	22	2	0	11.887	8.43731	5.5916	8.47346	15.2572	15.376	17.3092	21.0548	19.1989	15.8092	12.2493	9.71803	8.23976	7.36807	6.76896	6.32391	5.96176	4.19644	3.33738	2.84945	28.7505	22.5924	15.9216	21.3535	36.3401	36.316	40.3936	48.6109	44.4139	36.772	28.7474	23.0152	19.6277	17.5913	16.1655	15.0882	14.2464	10.6881	8.50844	7.29541	43.9019	40.198	29.2496	35.6619	61.2797	60.6307
ISys 1 (ng/mL)	107	2	0	1.66111	2.16672	2.02406	3.52421	6.47439	6.68735	7.70348	9.57258	8.9363	7.53684	5.95548	4.73016	3.19283	2.38188	1.86968	1.50533	1.23308	1.02563	0.86607	0.742588	5.03177	8.28932	8.42508	10.9942	20.5515	20.8176	23.4221	29.0661	27.6499	23.7383	19.0612	15.4738	12.7936	9.12781	7.07776	5.72057	4.72586	3.96694	3.37842	2.91817	12.4356	19.7629	19.4517	26.5658	43.5333	44.8362
ISys 1 (ng/mL)	24	2	0	3.95568	5.70477	4.76853	6.30662	10.7619	11.293	13.1529	16.6367	16.0803	13.9898	11.3787	9.3536	8.08445	7.28367	6.70028	6.24493	5.88089	5.58862	5.35541	4.83308	20.0002	25.3103	20.1374	24.8871	41.8647	45.0135	52.5423	66.7332	65.9056	58.4916	48.6456	40.7349	35.5292	32.0521	29.3917	27.225	25.4214	23.9107	22.6461	20.5351	70.075	66.3188	50.0611	60.1902	97.518	103.609
ISys 1 (ng/mL)	45	2	0	2.90796	3.35893	3.18769	4.94454	8.35686	8.37654	9.39731	11.4423	10.4559	8.55961	6.52456	5.0547	4.19192	3.69537	3.3723	3.14617	2.98226	2.86181	2.77346	2.01014	6.59849	10.0124	10.3298	12.0885	21.4702	25.4388	27.4171	31.6756	28.7057	23.5765	18.1359	14.1958	11.8599	10.4909	9.58184	8.93262	8.4519	8.08968	7.8153	7.05297	18.6169	22.7282	22.1835	28.2899	45.8812	44.9646
ISys 1 (ng/mL)	58	2	0	15.9039	16.5134	12.9547	17.9366	33.2918	36.9944	44.3238	57.9839	59.4251	54.9822	47.9262	41.9781	37.9811	35.3345	33.3244	31.6826	30.3035	29.1357	28.1489	26.392	92.822	95.542	78.221	92.9466	150.063	163.759	185.412	226.095	227.59	210.293	185.961	165.368	150.669	140.026	131.405	124.06	117.692	112.143	107.307	100.817	223.668	218.341	183.092	204.27	298.365	318.683
ISys 1 (ng/mL)	23	3	0	10.3642	14.4322	12.8989	15.8716	34.1209	37.1898	42.5933	54.7212	54.57	48.7444	40.6766	34.2651	30.3459	28.092	26.5913	25.4986	24.6763	24.0569	23.6007	22.1696	72.9515	87.6369	78.7975	87.0184	156.747	168.381	183.202	219.056	214.447	191.143	162.241	139.108	123.764	113.695	106.232	100.322	95.5154	91.5674	88.3185	83.1025	159.661	188.206	172.69	182.252	286.035	313.154
ISys 1 (ng/mL)	44	3	0	10.9744	9.04049	6.99782	10.1296	18.6412	20.6446	24.6555	31.7671	32.1108	29.3968	25.2951	21.8358	19.4963	17.9206	15.4404	12.3634	10.3055	8.74713	7.48017	6.41667	41.4553	49.1674	41.6377	51.4823	85.2528	94.3341	109.67	136.989	139.182	129.103	113.718	100.316	90.6037	83.4501	76.7832	64.9242	55.5154	48.2963	42.2998	37.1372	117.748	122.532	103.913	119.461	180.831	194.626
ISys 1 (ng/mL)	50	3	0	4.39043	5.42372	4.25249	5.92555	11.8489	12.5784	14.5705	18.216	17.3009	14.8484	11.9738	9.77103	8.36519	7.45873	6.79551	6.28105	5.87391	5.55072	5.29587	4.77548	25.3844	20.3472	15.0146	20.5556	36.0407	37.835	43.272	53.5208	51.1756	44.3673	36.269	29.996	25.9281	23.2473	21.2431	19.6591	18.3835	17.3526	16.523	14.9963	49.361	48.8701	38.3957	47.0324	77.7309	81.0302
ISys 1 (ng/mL)	89	3	0	9.53374	14.2802	15.0748	19.1484	39.7362	51.3232	59.2147	74.8184	76.7187	71.1953	62.062	54.009	48.3619	44.5376	41.6642	39.375	37.5079	35.9767	34.7272	32.5629	58.4871	86.9179	93.999	108.006	152.372	227.05	250.021	287.531	284.009	259.972	227.911	200.108	179.536	164.367	152.223	142.106	133.555	126.298	120.147	112.309	181.387	206.325	203.591	217.651	316.774	395.233
ISys 1 (ng/mL)	118	3	0	9.01683	10.7072	10.3961	14.2587	24.4215	25.9309	29.8568	37.5066	36.6365	32.3026	26.7758	22.282	19.1968	17.1021	15.5498	14.3449	13.3907	12.63	10.3339	8.23218	37.9308	43.1222	39.9477	50.0628	80.4557	84.7057	95.5147	117.046	113.774	100.391	83.7934	70.3425	60.9927	54.4466	49.423	45.3997	42.1237	39.4414	32.6932	26.8769	77.3457	90.3034	81.8938	98.348	150.151	155.743
ISys 1 (ng/mL)	99	3	0	12.1301	17.3785	15.6623	19.3846	32.633	34.8553	39.7293	49.3999	48.5104	42.9857	35.791	29.842	25.7353	22.9373	20.8404	19.1947	17.8819	16.8312	15.9942	14.6373	63.8412	60.8044	49.3704	57.101	93.3784	99.9491	111.793	135.377	132.326	117.507	98.7552	83.2096	72.2532	64.5453	58.6094	53.8496	49.9793	46.8225	44.2531	40.596	106.921	114.2	98.1013	108.942	165.083	173.507
ISys 1 (ng/mL)	127	3	0	8.97997	7.00735	5.11392	7.99493	15.0303	15.9403	18.3659	22.694	21.4842	18.3338	14.6196	11.7164	9.82524	8.60149	7.73066	7.08373	6.59567	6.2265	5.94919	5.35064	27.831	25.8676	19.9507	25.7233	42.7871	44.5074	50.1145	57.1657	59.249	49.9855	39.9921	32.3152	27.2717	23.9487	21.5434	19.7283	18.3369	17.2656	16.4427	14.8595	44.0123	52.4065	43.3178	48.9689	67.0461	70.4195
ISys 1 (ng/mL)	124	3	0	2.54411	5.92709	8.53013	11.9544	22.7173	18.8731	13.3847	11.7098	10.8659	10.2839	9.86124	9.55022	9.32107	9.15315	9.03138	8.9445	8.88403	8.84349	8.81797	8.80364	18.6382	25.3195	29.4616	31.972	37.4217	44.8814	36.0173	26.9127	22.8733	20.556	18.8079	17.4352	16.34	15.4574	14.7398	14.1513	13.6642	13.2572	12.9138	12.6209	22.3648	35.6859	44.8581	57.2704	71.0252	63.9615
ISys 1 (ng/mL)	15	3	0	12.7191	10.6526	7.31042	11.1765	21.6667	23.805	28.2574	36.2891	35.9712	32.0609	26.6787	22.2438	19.287	17.3532	15.9463	14.8697	14.0315	13.3781	10.2704	8.16731	70.0381	53.0622	38.5298	49.4962	85.6351	93.2467	106.706	131.333	129.395	115.775	97.8335	82.8252	72.261	64.8343	59.1144	54.528	50.7979	46.2644	37.0009	31.1991	137.261	116.28	86.8653	102.713	162.905	173.658
ISys 1 (ng/mL)	104	3	0	2.13661	4.16998	4.5376	7.03724	13.7882	14.3449	15.9666	19.2146	17.8291	14.8159	11.3995	8.74328	7.01606	5.92555	5.18845	4.67296	4.30706	4.0463	3.86179	3.43337	9.55758	14.8329	15.2698	18.9357	32.1842	37.8618	40.2897	46.5123	42.7215	35.446	27.3651	21.1021	17.0153	14.413	12.638	11.3859	10.4893	9.8435	9.37993	8.37418	20.531	28.6011	28.0932	35.6475	57.1445	60.2417
ISys 1 (ng/mL)	123	3	0	16.3809	17.2241	12.3641	17.1497	32.9539	35.2505	41.386	53.3845	52.5993	46.5044	38.6391	32.6261	29.0386	26.9649	25.5309	24.4252	23.5342	22.8077	22.2174	20.7261	101.339	81.0409	60.4975	75.4795	126.737	134.509	150.123	176.901	177.572	155.934	131.066	112.173	100.198	92.5215	86.7789	82.1129	78.1962	74.869	72.0337	67.3207	197.221	166.514	128.972	149.831	196.843	211.885
ISys 1 (ng/mL)	40	3	0	3.64426	7.83862	9.66408	13.6668	23.8859	34.0822	38.1377	45.1595	43.7763	37.9718	30.3196	23.8038	19.3278	16.4913	14.6348	13.3913	12.5471	11.9713	11.5818	9.19058	20.8579	36.5369	42.7734	57.1736	93.6234	114.545	126.235	149.099	146.399	129.061	105.589	84.9156	69.931	59.768	52.6723	47.6149	43.9603	38.7799	33.7307	27.1661	50.2321	78.3225	88.4766	109.861	167.636	208.663
ISys 1 (ng/mL)	17	3	0	2.82956	5.19058	7.50766	12.3229	22.0671	23.9811	27.999	35.933	36.1915	32.8229	27.9677	23.9595	21.3354	18.0929	14.5418	12.226	10.5473	9.23748	8.17562	7.29784	19.7184	34.8253	49.6244	68.7039	105.372	111.661	123.833	150.021	149.774	136.456	118.441	103.354	92.8041	81.6386	68.9007	60.0091	53.2131	47.685	43.0509	39.109	64.6857	93.6055	116.573	143.412	204.133	212.514
ISys 1 (ng/mL)	122	4	0	5.02112	4.72913	3.06257	4.86674	9.25151	9.18803	10.7428	13.6856	12.953	10.9897	8.69047	6.90977	5.75537	5.01079	4.4816	4.08696	3.78747	3.55989	3.38873	3.02224	23.4303	15.7036	10.5267	16.1127	28.3349	27.4975	32.0307	39.9666	37.8308	32.2264	25.6557	20.5586	17.234	15.0565	13.4789	12.2812	11.3566	10.6407	10.0899	9.01698	48.4949	34.4756	23.4278	33.7053	53.7404	56.1417
ISys 1 (ng/mL)	120	4	0	8.22256	8.2046	5.39075	7.84687	14.4936	15.2443	17.8003	22.3886	21.427	18.5292	15.0854	12.4566	10.804	9.75917	8.99587	8.39767	7.91763	7.53155	7.22394	6.57574	42.752	29.8622	20.2023	27.1327	47.1161	49.6833	56.1395	68.6968	65.5694	56.8819	46.7806	39.0294	34.0191	30.7137	28.212	26.1957	24.5362	23.1645	22.0347	20.1064	89.4643	57.3652	40.5161	52.1765	86.9431	90.4074
ISys 1 (ng/mL)	46	4	0	4.39011	11.9342	11.8541	14.8698	26.5778	29.0535	34.339	44.9329	45.3109	40.464	33.4408	27.6567	23.9779	21.7995	20.3525	19.3166	18.5535	17.9914	17.5865	16.4329	46.1724	78.816	69.0294	75.5449	120.604	129.764	143.903	174.1	171.176	151.56	126.647	106.25	92.4543	83.3885	76.8234	71.7908	67.8413	64.7174	62.247	58.3004	86.092	151.053	151.631	157.515	225.608	236.495
ISys 1 (ng/mL)	62	4	0	5.01466	9.01676	9.2559	12.1301	22.3639	23.4183	26.5268	32.9432	32.2863	28.7482	24.1487	20.4378	17.9864	16.3907	15.2242	14.3198	13.6037	11.1109	9.02772	7.6783	24.4317	39.0278	39.9187	49.4934	81.2978	92.7178	103.162	124.755	123.52	111.926	96.4807	83.6455	74.7275	68.5263	63.7037	59.7464	56.2687	49.9772	43.6898	37.6325	69.1196	99.1746	100.377	115.523	180.217	189.167
ISys 1 (ng/mL)	14	4	0	4.43153	3.88459	3.06314	4.39498	7.83766	8.27389	9.69177	12.2408	11.7875	10.2584	8.38061	6.93435	6.02459	5.44157	4.53342	3.42495	2.76981	2.31186	1.95868	1.67388	8.76651	13.9028	13.8499	18.6562	31.5702	33.6442	39.7772	51.8251	52.254	47.2282	39.8057	33.7456	29.8151	27.2339	25.2495	23.0305	17.8843	14.5935	12.3439	10.6025	35.7617	49.4509	47.7405	60.5181	92.4488	105.512
ISys 1 (ng/mL)	42	4	0	6.97626	11.6538	11.5642	17.9116	32.1122	31.653	36.9699	46.9206	45.4167	39.2642	31.6321	25.6955	22.0052	19.8055	18.3295	17.2753	16.5053	15.9421	15.5362	14.3944	72.0331	59.4443	47.5921	62.3721	103.279	109.034	120.665	145.331	139.065	120.307	98.3372	81.182	70.0446	62.9492	57.9227	54.1601	51.2774	49.0463	47.3146	44.0015	89.879	114.3	105.752	131.093	199.92	192.902
ISys 1 (ng/mL)	97	4	0	7.50842	11.6552	10.3575	13.6178	23.3149	24.6199	28.2119	35.2969	34.4756	30.3439	24.9758	20.5983	17.6656	15.7387	14.3445	13.2894	12.4796	11.859	11.3894	10.4244	38.2219	48.0094	41.9642	49.1521	83.2687	87.8643	98.2568	119.1	115.777	102.256	85.2983	71.348	61.6426	54.9205	49.8333	45.8293	42.6347	40.0783	38.0388	34.8705	75.5912	98.6986	89.4616	95.0922	152.424	166.768
ISys 1 (ng/mL)	115	4	0	6.07971	9.83924	8.69604	11.793	20.3188	21.2261	24.3664	30.5576	29.4896	25.7128	21.0758	17.4888	15.224	13.7817	12.7159	11.8738	11.1951	10.6476	10.2105	9.21526	32.0595	41.487	35.4608	43.1916	69.9504	73.0571	81.7573	99.6128	96.0598	84.2459	70.0628	58.9364	51.5991	46.667	42.8784	39.7941	37.2367	35.109	33.3449	29.177	69.0803	86.2964	74.7168	86.5594	131.479	134.894
ISys 1 (ng/mL)	129	4	0	7.40834	4.48819	2.99655	4.9647	10.343	10.9503	12.6827	15.8088	14.8756	12.6359	10.0522	8.09056	6.84947	6.05211	5.47284	5.02911	4.68271	3.47171	2.63192	2.14136	20.8834	19.0174	12.9013	17.0566	30.6511	32.3778	36.9585	45.7819	43.6079	37.5096	30.241	24.6172	20.9725	18.559	16.7556	15.3391	14.2057	12.7767	9.35887	7.53798	50.3212	36.9191	25.843	34.0379	60.3196	63.4105
ISys 1 (ng/mL)	85	4	0	5.71169	5.59438	5.01972	8.27738	15.9503	17.0918	19.8307	24.811	23.8466	20.7428	16.9942	14.0801	12.2002	10.9763	10.0702	9.35829	8.78638	8.32418	7.95154	7.22922	15.7665	22.0522	22.9322	32.0538	52.0946	54.1278	60.4633	73.2579	70.3065	61.5126	50.9938	42.7255	37.2471	33.5547	30.7435	28.4831	26.6284	25.0957	23.8281	21.7226	34.6067	47.4934	49.9868	62.735	104.376	106.514
ISys 1 (ng/mL)	68	4	0	12.8835	19.3485	16.388	21.3908	42.2061	44.4529	50.6667	63.5829	61.24	52.8305	42.642	34.785	29.8813	26.8956	24.8309	23.3054	22.1516	21.2762	20.6186	19.0449	64.7312	82.3359	69.8113	79.0177	130.668	139.057	149.827	177.307	167.891	144.497	117.95	97.5426	84.4098	76.0163	69.9945	65.4155	61.8533	59.0602	56.8699	52.8241	124.191	152.035	128.921	141.014	222.013	227.187
ISys 1 (ng/mL)	128	4	0	4.48067	4.64102	3.81037	5.26472	9.12989	9.4169	10.8318	13.3918	12.6341	10.901	8.96524	7.5381	6.65223	6.07767	5.63709	4.82482	3.81681	3.19893	2.7512	2.39202	16.6962	14.619	11.5314	15.0702	19.1447	20.8406	22.3307	23.708	24.9824	26.1713	27.2818	28.303	23.1597	18.859	16.7927	13.4426	11.01	9.40014	8.16185	7.13749	30.5961	31.5377	25.3364	28.4988	29.7832	30.9055
ISys 1 (ng/mL)	100	4	0	5.04007	5.08425	3.54936	4.91231	10.5769	11.1517	13.0273	16.6841	16.1048	14.016	11.4361	9.48968	8.3194	7.60719	7.08879	6.67944	6.3481	6.07957	5.86443	5.32201	30.4342	26.4292	19.2626	24.7276	47.2883	50.9354	59.6805	76.6139	76.017	67.8891	57.0782	48.5555	43.098	39.5201	36.7484	34.4383	32.4688	30.7822	29.3416	26.8718	88.5369	80.3137	61.093	70.3904	120.164	126.473
ISys 1 (ng/mL)	11	5	0	11.5264	13.738	10.1342	13.4494	24.2101	25.6812	29.7419	37.4599	36.2376	31.6098	25.9154	21.5176	18.7721	17.0871	15.9016	14.9983	14.2833	13.7074	13.2407	10.8626	48.1739	54.4233	41.6665	49.9881	82.3863	87.0482	98.2379	120.111	116.255	102.226	85.2161	71.8871	63.1952	57.5104	53.2887	49.9295	47.1677	44.8587	42.9104	38.3813	109.954	114.123	87.9438	100.657	155.595	162.019
ISys 1 (ng/mL)	16	5	0	5.40465	5.28795	4.37225	6.10537	11.5177	12.7327	14.9698	18.6177	17.8138	15.3812	12.4104	10.0649	8.53665	7.56178	6.87493	6.36628	5.98313	5.69481	5.48119	4.98513	18.1884	24.0459	21.3587	27.3363	46.8495	52.5234	61.2	77.9102	77.7728	69.1721	57.1757	47.4132	40.8302	36.4225	33.1476	30.5899	28.555	26.9285	25.6321	23.4389	55.6151	72.6297	64.7408	77.3755	116.072	134.16
ISys 1 (ng/mL)	84	5	0	5.07247	9.51362	10.0485	12.8158	23.7506	27.458	31.1243	38.2267	37.9419	34.51	29.8614	26.0339	23.4266	21.6508	20.2731	19.1307	18.1594	17.3237	14.1897	11.9816	44.9727	47.2435	43.3389	51.9889	81.0726	97.2309	110.055	131.492	130.556	119.702	105.265	93.1941	84.5897	78.3237	73.1701	68.69	63.5412	57.1216	51.3089	44.5126	71.2591	98.4623	97.8853	105.06	147.082	174.611
ISys 1 (ng/mL)	32	5	0	6.66906	11.0514	10.2199	14.0536	24.5583	26.1462	29.8166	36.9393	35.9822	31.7834	26.4805	22.1957	19.3091	17.3743	15.9284	14.7897	13.8755	13.1387	12.5472	11.5187	36.9642	43.4861	38.4181	47.3014	75.4676	79.5944	88.6706	107.029	104.315	92.8173	78.4273	66.6692	58.5107	52.8111	48.399	44.8218	41.8738	39.4327	37.4132	34.441	69.0546	87.1041	78.2851	92.2094	139.201	144.959
ISys 1 (ng/mL)	77	5	0	6.88083	12.6269	11.6941	16.3737	29.3386	31.9142	37.7425	49.0744	48.8711	43.1177	35.0689	28.4662	24.1615	21.4605	19.5718	18.1639	17.0842	16.2487	15.6033	14.2485	43.9033	64.1105	58.1878	71.5683	117.335	125.719	140.945	171.93	167.482	146.559	120.242	98.8174	84.2847	74.6146	67.5863	62.2289	58.0617	54.7963	52.2366	48.1645	113.876	135.066	120.597	141.433	218.904	231.524
ISys 1 (ng/mL)	130	5	0	11.0278	10.3845	8.71841	13.3935	25.0338	27.1055	31.6388	40.7701	40.8401	36.7427	31.0619	26.5845	23.9152	22.4545	21.5241	20.8683	20.3918	20.0515	19.8237	18.8603	48.9026	62.0068	61.9937	80.1262	130.131	143.213	161.051	197.263	201.14	186.685	165.346	147.462	135.588	127.992	122.395	117.879	114.092	110.876	108.135	103.668	124.117	162.072	176.751	205.711	300.329	333.964
ISys 1 (ng/mL)	103	5	0	7.48775	12.7781	12.5975	15.5372	19.0718	33.3817	45.0929	57.0589	56.1536	50.9789	44.358	38.9812	35.369	32.9787	31.1783	29.7167	28.4911	26.9962	22.7482	19.851	45.7613	67.4385	67.6693	74.6936	90.1401	130.603	158.615	216.727	211.738	193.314	171.463	153.588	140.904	131.755	124.325	117.92	112.268	106.809	94.0246	84.3895	135.295	165.941	161.411	164.145	212.896	247.067
ISys 1 (ng/mL)	57	5	0	3.25261	5.05435	5.03922	6.4989	11.6375	14.9919	11.8388	10.9327	10.738	10.7644	10.8742	11.0241	11.1975	11.386	11.5845	11.7888	11.9946	12.1887	10.5354	8.56215	26.7907	25.0656	21.6597	24.3383	40.2842	40.7105	28.741	25.2364	23.4902	22.3461	21.5091	20.8715	20.3793	19.9987	19.7053	19.4808	19.3106	19.1835	19.0904	19.024	43.8107	52.5004	51.4612	57.2758	80.51	86.3476
ISys 1 (ng/mL)	91	5	0	11.3385	18.3466	16.8693	15.2293	13.772	13.2279	13.1104	13.1945	13.3797	13.6227	13.9025	14.2074	14.5305	14.8669	15.2131	15.5665	15.9252	16.2876	16.6523	17.0179	52.3387	74.694	68.3197	68.1191	63.7836	50.3305	45.7686	43.0986	41.2008	39.7507	38.6009	37.667	36.894	36.2439	35.6891	35.2094	34.7897	34.4187	34.0878	33.7903	116.884	144.162	126.096	108.165	88.1757	78.3757
ISys 1 (ng/mL)	71	5	0	7.59184	11.2621	10.157	12.5354	25.4514	26.6933	30.6219	38.9056	38.3782	34.085	28.4348	23.9866	21.196	19.4669	18.2061	17.197	16.3562	15.6447	15.04	13.8274	42.2174	54.6921	48.9666	57.2372	97.419	103.759	117.069	144.893	144.136	129.784	110.706	95.2267	84.8732	77.8936	72.4753	67.9493	64.0547	60.663	57.6956	53.28	105.519	130.219	118.247	135.468	202.162	212.777
ISys 1 (ng/mL)	31	5	0	3.1434	5.24869	4.76487	6.61766	11.1097	6.45624	5.26985	4.77204	4.45443	4.24123	4.09769	4.00261	3.94186	3.90554	3.88666	3.88017	3.88244	3.89086	3.90352	3.91905	24.2452	25.7106	21.4157	26.4895	20.4113	14.1294	11.8667	10.3694	9.28831	8.48827	7.88778	7.43221	7.08311	6.81273	6.60084	6.43259	6.29703	6.18608	6.09377	6.01566	35.3948	47.6831	42.8218	52.3083	75.8382	65.4847
ISys 1 (ng/mL)	29	5	0	10.7931	9.07593	7.09221	10.0972	18.758	20.205	23.4394	29.6827	29.3853	26.479	22.6897	19.716	17.8227	16.6236	15.7271	14.9916	14.3662	13.8295	13.3709	12.4985	34.5983	43.8198	38.5025	44.2882	73.1666	80.7383	90.1328	108.936	107.722	97.9512	85.5072	75.5981	68.9729	64.4365	60.802	57.6537	54.8496	52.3323	50.0726	46.8156	90.9705	104.44	90.2289	99.2241	149.528	156.594
ISys 1 (ng/mL)	61	5	0	2.52453	4.66552	5.72752	8.92115	14.8145	15.6206	17.7506	22.1533	21.6789	18.9409	15.3119	12.3013	10.2646	8.93072	7.98132	7.27532	6.74133	6.33637	6.03166	5.42892	15.8704	22.3891	25.5006	33.2573	52.1014	55.2701	62.1236	76.4625	75.2724	66.3574	54.4501	44.3727	37.2903	32.4256	28.8148	26.0289	23.8463	22.1287	20.7794	18.7178	40.4384	52.0587	57.6203	70.0145	104.2	108.815
ISys 1 (ng/mL)	19	6	0	6.48144	11.8927	12.2578	16.7317	29.0342	30.8595	35.7831	46.0199	45.6882	40.6068	33.8327	28.4988	25.2034	23.261	21.9276	17.7409	14.5739	12.6265	11.2512	10.1862	37.6999	60.9615	61.8147	73.0126	114.463	121.247	134.721	164.237	161.879	144.483	122.588	105.167	93.7451	86.3389	79.2174	67.9408	58.6615	52.4255	47.7405	43.9643	99.9726	135.792	131.615	146.688	216.024	226.534
ISys 1 (ng/mL)	110	6	0	15.7358	19.898	15.6229	20.4676	40.8705	48.7822	56.8406	71.884	72.5945	66.3878	57.4634	50.0017	44.947	41.5921	39.0637	37.0288	35.3531	33.9676	32.8279	30.8838	92.214	107.878	88.1759	96.5464	155.278	172.649	190.515	227.278	226.719	207.774	182.383	160.955	145.703	134.815	126.138	118.857	112.639	107.303	102.727	96.5681	193.467	216.955	180.642	190.477	282.259	303.767
ISys 1 (ng/mL)	27	6	0	6.72514	7.39829	6.26271	8.83322	15.301	16.0611	18.393	22.9771	22.2121	19.3406	15.7404	12.8584	10.9523	9.69707	8.77226	8.05587	7.49163	7.04628	6.69696	6.03315	24.5947	27.0878	23.5969	28.253	49.6724	52.6277	58.9308	72.3915	70.6574	62.3254	51.6635	42.9149	36.8889	32.7279	29.5431	26.9959	24.9293	23.2475	21.8824	19.7951	48.7992	58.5111	52.4026	60.6333	97.9835	102.014
ISys 1 (ng/mL)	49	6	0	9.14737	9.00795	7.82943	11.0272	19.3984	20.461	23.3362	28.9533	27.8715	24.1867	19.6508	16.0257	13.6194	12.0431	10.9034	10.0409	9.3775	8.86581	8.4735	7.70726	30.1313	33.1744	29.7155	37.3505	59.2871	61.7473	68.8032	83.5278	80.6405	70.5679	58.1703	48.127	41.27	36.6121	33.1357	30.43	28.291	26.5916	25.2422	23.0473	55.768	65.8057	60.7793	70.7933	111.742	114.47
ISys 1 (ng/mL)	51	6	0	9.94311	15.4257	13.7093	18.7429	34.6289	38.1959	45.2786	58.2711	59.2509	54.8144	48.2378	42.935	39.5791	37.5021	35.9591	34.6741	33.5514	32.5562	31.6744	30.0055	88.9137	89.4307	77.5349	90.4383	144.123	155.74	174.28	209.45	209.614	193.957	173.045	156.032	144.455	136.386	129.816	124.021	118.758	113.937	109.519	103.427	180.808	198.73	176.79	194.367	277.24	289.144
ISys 1 (ng/mL)	65	6	0	5.473	6.83888	5.51227	6.5362	7.35271	7.87804	8.34042	8.76173	9.1483	9.5095	9.85159	10.1792	10.4952	10.8013	11.0961	11.343	8.82897	7.38656	6.56904	5.74908	19.2412	23.7302	18.7631	16.6547	16.0423	15.819	15.7553	15.7767	15.848	15.9525	16.0794	16.2211	16.3723	16.5289	16.6878	16.8468	17.0042	17.1589	17.3099	17.4565	47.0073	51.6816	39.3263	30.9325	28.1589	26.4768
ISys 1 (ng/mL)	37	6	0	8.59879	7.4018	4.68556	6.80679	13.7811	14.6141	16.8115	21.3411	20.1557	17.0529	13.4533	10.8309	9.31787	8.45396	7.26749	5.20127	4.16831	3.54067	3.09596	2.75615	38.3266	30.7915	20.369	27.2218	52.7286	56.2239	64.4656	81.744	78.7891	67.8779	54.7442	44.8717	38.8675	35.2041	29.6331	22.8347	19.0907	16.6111	14.7569	13.2913	90.077	77.8458	53.7335	65.3837	116.999	122.947
ISys 1 (ng/mL)	93	6	0	11.2991	20.1092	20.3128	25.3924	51.1806	59.2797	67.7677	85.9334	86.7996	78.6096	66.5147	56.269	49.4023	45.0682	42.0736	39.8827	38.2366	36.9887	36.046	34.007	79.4266	112.428	110.398	123.095	207.475	224.218	242.753	285.787	281.026	252.483	215.736	184.96	163.439	148.825	138.092	129.844	123.362	118.21	114.09	107.874	217.105	236.996	217.022	235.763	361.592	382.965
ISys 1 (ng/mL)	70	6	0	20.5882	21.3727	18.7035	21.8337	22.8537	23.8663	24.9432	26.0169	27.0587	28.0666	29.043	29.9905	30.911	31.8053	32.6736	33.5153	34.3295	35.1098	35.8348	29.5704	79.4968	90.7969	80.876	72.7434	65.3766	61.0649	58.2423	56.2386	54.7562	53.6478	52.8225	52.2165	51.7813	51.4796	51.2821	51.1656	51.1122	51.1071	51.1392	51.1997	134.097	166.817	150.226	143.572	142.363	114.213
ISys 1 (ng/mL)	78	6	0	4.3485	7.18307	7.11223	10.5361	18.465	19.1425	22.3996	28.6941	28.3666	25.2061	20.8542	17.2941	14.9708	13.5047	12.4684	11.6979	9.94578	7.35158	5.84451	4.82905	39.9923	43.4572	37.933	49.8617	84.3195	91.3502	103.557	127.428	125.613	112.143	94.4842	79.7094	69.2953	61.9854	56.345	47.8556	38.1568	31.8001	27.1406	23.5134	63.1931	92.0053	88.6571	100.893	148.886	170.186
ISys 1 (ng/mL)	28	6	0	4.24528	6.68982	6.87228	11.191	18.9532	20.1002	23.2343	29.0822	28.3631	25.2216	21.2357	18.1122	16.0971	14.7577	13.7146	12.8452	12.1049	11.4723	10.9338	9.94408	41.2621	33.5332	28.8408	33.9605	70.135	74.6216	85.638	105.483	103.631	93.1312	79.7253	68.9789	61.6966	56.5555	52.3659	48.7498	45.5742	42.775	40.3116	36.7205	104.756	84.9845	72.2582	90.5654	142.062	149.135
ISys 1 (ng/mL)	35	6	0	25.5611	32.2178	28.6466	38.3604	67.7691	74.7486	85.8835	107.495	109.15	100.945	88.9495	79.0176	72.5181	68.4717	65.6189	63.4474	61.7422	60.3935	54.3941	48.7462	93.3048	132.396	134.072	158.778	238.739	258.825	282.58	330.781	330.834	306.991	274.917	248.195	229.766	217.235	207.674	199.896	193.392	187.888	180.629	169.018	231.621	286.634	282.801	311.425	442.057	469.583
ISys 1 (ng/mL)	90	6	0	8.63718	8.61755	6.74254	9.77393	18.1328	19.4965	22.9754	29.3147	28.8177	25.7401	21.7442	18.6006	16.5822	15.2683	14.2692	13.451	12.7629	12.1798	11.6866	10.0658	36.7467	44.2995	36.276	44.2455	72.6981	77.9366	89.5316	111.416	110.693	100.496	86.9249	75.9291	68.465	63.237	59.0141	55.387	52.2063	49.3994	46.9215	42.8571	94.6503	109.723	91.8221	104.56	157.204	165.232
ISys 1 (ng/mL)	117	7	0	1.80186	3.30909	3.99394	5.41827	13.3322	16.7954	18.1524	21.2819	20.0475	17.0627	13.5378	10.716	8.8222	7.5817	6.70799	6.06786	5.59077	5.23348	4.96717	4.45764	11.2124	14.0866	15.9354	21.1647	44.6064	47.0829	51.0662	60.7548	58.0388	49.9478	40.0759	32.0637	26.6101	22.9648	20.3359	18.3638	16.8586	15.702	14.8136	13.313	23.2843	29.7064	33.3008	41.6911	82.4287	93.871
ISys 1 (ng/mL)	67	7	0	11.0471	8.23764	5.84682	8.53764	17.0736	18.2953	21.5097	27.609	27.1778	24.1333	20.0822	16.8548	14.8059	13.5395	12.6491	11.9845	11.4819	11.1068	10.8372	10.0566	60.9779	47.5588	35.8393	45.6005	82.9022	90.5436	104.109	129.963	129.712	117.551	100.984	87.2444	77.8052	71.3252	66.3145	62.2241	58.8245	55.9879	53.6279	49.943	135.329	135.895	108.3	111.642	185.302	203.556
ISys 1 (ng/mL)	105	7	0	3.29807	6.23293	8.01601	15.9588	35.8304	39.3806	45.5537	58.7065	59.3719	53.5369	44.9709	37.8806	33.3601	30.701	28.9459	27.6932	26.7722	26.0964	25.6141	24.2199	41.04	57.1984	70.5628	95.2214	146.824	190.547	213.984	244.866	238.091	212.288	180.58	154.516	136.628	124.677	115.88	109.018	103.532	99.1049	95.5283	90.2434	123.362	146.756	165.987	215.633	322.498	336.411
ISys 1 (ng/mL)	64	7	0	18.9687	8.87845	6.04964	10.3892	20.4075	21.8466	25.5594	32.2078	31.1782	27.4847	22.9489	19.4507	17.2313	15.7937	14.7093	13.8359	12.1135	9.5738	8.10336	7.05645	62.9734	42.3293	28.6455	39.9063	61.7871	69.135	75.7213	81.7438	87.1207	91.9331	82.6864	66.6642	58.1785	52.9488	49.0122	45.7906	42.6242	35.9201	30.1897	26.3943	139.429	85.6799	61.8994	78.4624	93.86	99.381
ISys 1 (ng/mL)	114	7	0	15.0698	16.6477	11.6591	13.4777	33.271	33.8508	38.5567	47.6863	46.2763	40.298	32.8011	27.0146	23.47	21.3576	19.9102	18.8411	18.0292	17.41	16.9426	15.6621	70.5721	77.9318	56.468	68.1272	114.349	118.374	131.398	159.287	153.362	134.021	110.988	93.0198	81.3826	73.8689	68.392	64.1439	60.7653	58.0522	55.8686	51.9449	175.124	148.274	111.554	130.894	183.295	216.619
ISys 1 (ng/mL)	121	7	0	3.69398	7.96766	10.3606	15.0033	41.0723	47.9721	52.7324	63.671	62.1367	55.1348	46.4315	39.5097	34.9837	32.079	29.9668	28.3068	26.9523	25.8277	24.8576	20.4027	32.0195	46.1115	54.7274	73.4373	131.998	139.171	148.226	172.355	166.972	148.698	126.78	109.267	97.4617	89.5012	83.4585	78.5493	74.4326	70.9261	64.0516	54.6855	82.768	100.587	110.834	140.171	205.353	235.417
ISys 1 (ng/mL)	9	7	0	7.02672	11.7877	11.7265	17.2423	30.7613	33.3119	38.8791	49.879	50.0694	45.2444	38.4465	32.8947	29.2742	26.9651	25.268	23.9209	22.8212	21.9185	21.1823	19.7446	57.3534	71.7272	67.3968	79.1392	124.025	133.007	148.482	180.185	179.233	162.563	140.498	122.209	109.512	100.654	93.6858	87.8768	82.9347	78.7076	75.0949	70.0316	136.477	157.545	146.148	161.895	234.531	247.233
ISys 1 (ng/mL)	38	7	0	2.74372	6.88519	8.55271	11.5434	11.3431	7.0825	5.46124	4.91474	4.56747	4.32668	4.15507	4.03151	3.94232	3.87804	3.83195	3.79918	3.77617	3.76031	3.74969	3.74286	11.2821	23.5321	27.818	27.1182	20.058	14.6521	11.4361	10.0185	9.04647	8.32393	7.7699	7.33637	6.99135	6.71234	6.48309	6.29168	6.12929	5.98931	5.86684	5.75814	19.4432	42.1958	30.9546	22.1052	17.2566	14.5073
ISys 1 (ng/mL)	34	7	0	4.80518	6.44023	6.85896	12.5295	28.5443	31.7633	36.5002	45.3561	44.2112	38.8583	32.1593	26.7026	22.9387	20.3741	18.468	16.983	15.8033	14.8609	11.9478	9.59703	19.9718	31.8386	36.6106	46.9601	92.6827	96.9425	103.817	121.576	116.329	101.741	84.5113	70.6237	60.9782	54.2642	49.1619	45.1131	41.846	39.1961	34.4672	27.8948	52.1103	66.8204	71.6324	92.0343	136.033	147.373
ISys 1 (ng/mL)	126	7	0	8.37564	7.59987	6.38842	7.04519	7.09273	7.15192	7.25233	7.37794	7.51617	7.66136	7.80999	7.95999	8.11001	8.25908	8.40648	8.5517	8.69433	8.83404	8.9706	9.10364	33.0213	32.3099	26.4047	21.7233	18.9803	17.1551	15.8951	15.0136	14.39	13.9464	13.6299	13.4039	13.2428	13.1285	13.0479	12.9916	12.9529	12.927	12.9103	12.9002	36.1125	53.0525	51.0624	51.4612	69.7162	47.6038
ISys 1 (ng/mL)	43	7	0	2.06954	4.18603	5.38503	7.36101	15.5959	16.4396	18.7903	23.841	24.0216	21.8767	18.7162	16.1314	14.4963	13.4904	12.7598	12.1732	11.6834	11.2709	10.9262	10.1441	23.2523	32.186	37.1034	47.0023	78.5684	85.9186	98.2176	122.661	125.966	117.463	103.917	92.2629	84.2359	78.719	74.3089	70.475	67.0349	63.9204	61.1013	57.0627	77.5556	98.0049	110.302	133.263	194.016	204.609
ISys 1 (ng/mL)	47	7	0	10.5339	5.57771	3.60241	6.50245	11.9367	12.4318	14.3149	17.8852	16.4572	13.3989	10.0195	7.57088	6.16092	5.38647	4.91142	4.59988	4.38854	4.24335	3.12019	2.17128	26.2257	20.9077	15.622	23.534	39.4112	38.5275	43.5515	54.3552	50.5285	41.5989	31.5817	24.2067	19.8395	17.3493	15.7651	14.6881	13.9281	13.3798	11.7578	9.6825	43.677	48.3837	37.8306	50.9594	80.664	76.7243
ISys 1 (ng/mL)	92	7	0	2.51253	2.7313	2.1204	3.3905	6.27065	6.31568	7.20251	8.86663	8.03779	6.55173	4.99738	3.90597	3.28282	2.92512	2.68444	2.50884	2.3766	2.27616	2.20029	1.96773	10.1988	8.85694	6.56808	9.35144	16.4323	16.5778	18.8295	23.1339	21.1502	17.41	13.4344	10.6216	9.00112	8.05648	7.40878	6.92716	6.55718	6.26962	6.04607	5.432	16.6207	19.4189	15.6295	19.277	33.145	32.7124
ISys 1 (ng/mL)	79	8	0	6.92362	5.8727	4.69237	7.13793	13.2154	13.7146	15.8028	19.8288	18.5893	15.5977	12.207	9.69794	8.18842	7.30047	6.70763	6.28157	5.96566	5.72994	5.55615	5.05607	24.7292	24.4642	19.8638	26.4297	37.8064	41.3101	44.3881	47.2058	49.7397	52.0441	54.0781	39.6283	30.7417	26.3849	23.74	21.9023	20.543	19.5134	18.7302	17.0941	55.0688	56.9927	47.0297	56.0849	63.5356	64.4399
ISys 1 (ng/mL)	74	8	0	6.7462	5.37155	4.32029	7.42136	14.1068	16.1085	18.0999	19.9552	21.5095	21.2843	16.4074	13.0317	10.9106	9.55403	8.59424	7.88019	7.33872	6.92706	6.617	5.99345	18.5456	23.2934	21.4618	28.3854	31.2064	31.9303	32.8799	33.8921	34.8997	35.8817	36.831	37.7476	38.6337	39.4919	40.3232	41.1228	41.1904	32.2734	27.6607	23.878	45.7108	58.3798	54.4891	65.0985	59.3159	56.552
ISys 1 (ng/mL)	119	8	0	1.38645	2.63281	3.02126	4.13704	7.31786	8.92302	11.2625	16.4474	15.2402	12.6514	10.1447	8.35763	7.23751	6.51294	5.9758	5.54734	5.1947	4.9012	4.65666	4.23478	7.65498	10.5059	11.0433	13.0128	21.8045	28.0952	31.9125	39.0945	40.6395	34.616	27.7657	22.8948	19.8674	17.8958	16.4138	15.2154	14.2166	13.3749	12.6641	11.501	16.5498	22.4017	23.7609	28.71	45.2126	58.2346
ISys 1 (ng/mL)	54	8	0	5.06605	7.14917	7.7149	10.1377	16.2053	16.4443	18.6823	23.3579	22.2451	19.0383	15.3116	12.5872	11.0239	10.1445	9.54492	9.08416	8.71269	8.40961	8.16382	7.49057	23.5158	29.2596	30.1401	36.5049	55.6891	56.4841	62.5191	75.8293	71.9105	61.7268	50.258	41.8167	36.7585	33.706	31.5007	29.7333	28.2568	27.0065	25.946	23.8829	44.357	58.5543	61.2795	75.2458	106.806	105.64
ISys 1 (ng/mL)	96	8	0	3.76372	6.99681	7.73469	10.3156	22.5944	23.5239	26.3657	33.2665	32.3125	27.8358	22.0625	17.5113	14.6831	13.0131	11.9066	11.1169	10.5313	10.0892	9.75394	8.88299	27.6294	35.6492	36.8116	46.9455	82.6634	98.7138	109.589	134.679	131.952	115.071	93.259	75.534	63.7631	56.1804	50.8047	46.7739	43.6676	41.2387	39.3256	36.1167	71.2569	89.8465	92.1344	112.138	189.392	205.369
ISys 1 (ng/mL)	55	8	0	7.93041	6.86264	5.37653	8.6671	17.2362	18.6312	21.7009	27.435	26.7605	23.5298	19.4068	16.1088	13.9475	12.5548	11.5508	10.785	10.188	9.72065	9.35746	8.59855	29.954	37.1349	31.7886	34.6894	65.4152	73.0723	80.7366	98.679	97.214	87.0253	73.6361	62.6048	55.0472	49.9014	45.9972	42.8752	40.3263	38.2295	36.5031	33.7469	86.5198	91.6246	78.2367	84.2978	143.316	149.807
ISys 1 (ng/mL)	10	8	0	18.3171	23.6796	19.4607	23.0988	42.6991	52.2115	60.4117	76.0152	77.0976	70.4308	60.1264	50.982	44.4122	39.8684	36.4785	33.8474	31.7713	30.1241	28.8192	26.692	100.769	104.014	86.1326	94.2495	158.671	175.162	194.892	233.401	232.796	211.763	182.221	156.06	136.601	122.466	111.524	102.787	95.7213	89.9783	85.3047	79.0835	213.251	199.335	165.479	177.034	278.529	300.63
ISys 1 (ng/mL)	41	8	0	10.6309	7.8765	5.78327	9.42483	18.7492	20.2086	23.961	31.0745	30.3504	26.4623	21.463	17.6001	15.2695	13.9288	13.0427	12.4064	11.934	11.5813	11.3218	10.4643	52.5003	50.509	40.6575	51.2656	87.9739	94.6232	107.994	134.425	131.881	116.471	96.9465	81.4258	71.3059	64.7916	60.0511	56.3619	53.4063	51.0088	49.0545	45.6257	123.88	125.486	104.967	121.519	187.458	196.694
ISys 1 (ng/mL)	73	8	0	11.1948	16.9494	15.1293	19.3972	35.3627	40.9361	49.6768	63.2537	63.2437	57.0343	48.4163	41.5167	37.2022	34.6445	32.8872	31.5536	30.4964	29.6486	28.9736	27.3875	77.2488	97.0108	85.8603	96.2716	153.686	172.321	189.958	224.425	219.628	197.205	169.667	147.72	133.133	123.504	116.284	110.461	105.615	101.538	98.0996	92.8522	196.333	202.357	174.693	188.815	266.567	309.687
ISys 1 (ng/mL)	101	8	0	9.27138	9.68944	6.57532	9.36529	18.0034	18.8467	21.801	27.5646	26.3388	22.344	17.6195	14.0575	11.9077	10.6588	9.83587	9.25393	8.83002	8.51885	8.29248	7.59359	45.6711	41.7177	28.9284	36.4406	46.4353	49.3003	52.1566	54.8565	57.3339	59.6051	61.6881	63.5966	65.327	61.9023	46.6555	39.4808	35.4577	32.7869	30.8686	28.0336	114.248	88.2368	62.6264	74.9389	75.9441	76.137
ISys 1 (ng/mL)	76	8	0	9.74718	7.45585	5.41766	9.27289	18.5042	19.8699	23.437	29.9321	28.9696	25.27	20.725	17.2523	15.0952	13.7363	12.7262	11.9104	11.2311	10.6612	10.1845	9.20496	34.8676	39.3314	32.3832	40.5398	70.8763	74.8288	84.7768	104.648	101.227	88.9936	74.1556	62.6504	55.2207	50.2932	46.484	43.3186	40.6206	38.3047	36.3183	32.9829	74.9715	97.2389	85.1357	91.0026	160.611	169.173
ISys 1 (ng/mL)	36	8	0	2.738	5.48464	6.16259	8.72934	18.1394	18.9834	21.2699	26.2654	25.3267	22.097	18.1232	14.994	12.964	11.6582	10.7059	9.96809	9.38509	8.92408	8.56347	7.82994	16.3237	25.1652	26.966	30.3233	55.5002	65.7364	76.5504	99.4219	96.5086	84.3029	70.2341	59.1214	51.6068	46.4801	42.5514	39.3755	36.7617	34.6021	32.8224	30.1281	61.38	70.0803	67.6222	82.1538	130.41	142.059
ISys 1 (ng/mL)	86	8	0	11.3877	17.5849	18.9166	28.6117	54.3483	61.0373	72.8226	96.2017	100.776	94.5131	83.1476	73.3444	66.975	63.1764	60.6218	58.7342	57.2716	56.1201	55.2178	52.9843	85.0174	125.816	140.175	156.098	283.512	316.784	342.157	400.09	400.017	369.126	327.488	292.568	268.261	251.635	239.003	228.767	220.22	212.984	206.82	198.078	243.721	302.966	322.683	351.562	490.646	603.625
ISys 1 (ng/mL)	56	9	0	4.18023	5.92383	5.17776	6.73996	15.2616	16.5033	19.2122	24.7166	24.6164	22.0006	18.3058	15.2237	13.1612	11.8248	10.8564	10.1161	9.54048	9.09379	8.73566	6.41243	29.6843	36.8064	32.8873	39.5534	70.1753	76.0208	86.1936	107.096	107.625	97.6909	83.5329	71.2452	62.3463	55.9744	50.9688	46.872	43.4766	40.6575	36.1486	28.997	76.2666	90.2515	80.386	90.6882	146.694	155.992
ISys 1 (ng/mL)	94	9	0	2.36666	4.51133	5.08925	7.82291	13.3019	13.9986	15.7639	19.173	18.336	15.8416	12.7993	10.3327	8.65407	7.53462	6.72998	6.12801	5.67011	5.32055	5.05529	4.56637	12.7736	17.3018	17.8876	23.8736	37.6494	39.0845	43.3769	52.0694	49.8375	43.2693	35.2681	28.761	24.2867	21.2467	19.0155	17.3128	15.9923	14.9632	14.163	12.8307	25.0816	34.37	35.8905	44.0365	71.8253	74.1071
ISys 1 (ng/mL)	52	9	0	4.12832	5.05553	4.41927	6.10164	10.2405	10.561	11.9589	14.7062	13.8666	11.7463	9.27652	7.35279	6.09774	5.28656	4.71005	4.28006	3.95304	3.7031	3.3265	2.30315	12.7449	15.7588	13.7239	17.673	28.6959	29.566	33.4068	41.2066	39.326	33.6899	26.9073	21.5559	18.0161	15.6769	13.9715	12.6683	11.6536	10.8586	10.0242	7.49757	31.4893	32.7917	27.948	34.445	55.0722	57.179
ISys 1 (ng/mL)	48	9	0	7.77441	14.6733	15.5706	20.7592	35.6898	41.0814	46.5325	52.2916	58.1347	63.9195	53.5163	44.8786	39.7718	36.6368	34.3848	32.6254	31.2071	30.0563	29.1283	27.3056	54.1571	80.2645	83.4041	94.0625	141.799	163.145	163.24	150.366	148.248	148.769	149.981	151.423	152.952	154.509	156.052	157.43	138.522	124.698	116.053	107.194	152.171	189.001	188.883	208.653	246.152	242.099
ISys 1 (ng/mL)	80	9	0	16.3153	19.582	15.3868	19.6231	36.8771	42.2042	50.9708	67.3969	70.6658	66.3124	58.0574	50.5463	45.266	41.754	39.1619	37.1299	35.5003	34.1899	33.1465	31.1749	76.1167	112.497	114.902	128.812	196.057	216.805	243.713	294.516	300.66	280.588	249.185	220.49	198.654	182.322	169.122	158.046	148.639	140.634	133.843	125.416	192.664	252.206	253.605	274.598	380.427	409.113
ISys 1 (ng/mL)	26	9	0	8.37054	7.50958	5.72641	7.9246	19.3049	21.6286	25.3877	33.2155	33.1635	29.5393	24.3829	20.2866	17.8492	16.5258	15.7082	15.1615	14.7905	14.549	14.4107	13.5073	61.9112	66.1868	54.9589	62.2684	117.057	137.608	154.275	189.278	188.646	169.851	144.542	123.672	109.648	100.453	93.693	88.3817	84.0913	80.5914	77.7331	73.088	176.364	179.478	151.621	160.618	261.052	286.827
ISys 1 (ng/mL)	63	9	0	7.91389	11.4784	10.293	12.1371	24.1388	31.4458	35.5145	43.5769	43.4909	39.3868	33.627	28.7098	25.2595	22.911	21.158	19.7791	18.6715	17.7781	17.0613	15.8988	40.8477	49.6888	49.2972	53.1695	85.507	107.463	115.162	123.646	131.414	134.727	112.708	95.7796	84.2981	76.2651	70.049	64.9886	60.7878	57.2798	54.3519	50.5479	89.8382	104.576	100.901	105.856	152.979	171.971
ISys 1 (ng/mL)	69	9	0	5.86776	9.89471	9.20657	13.9362	28.4122	32.1166	39.7641	54.098	55.9817	51.4526	43.8047	37.4312	33.4555	31.143	29.579	28.4043	27.4783	26.7389	26.1543	24.552	68.924	93.893	86.7841	96.6028	171.621	183.913	202.803	220.056	233.984	231.204	192.652	164.412	146.223	134.282	125.406	118.322	112.49	107.632	103.579	97.5284	170.628	210.473	194.306	201.106	328.384	348.672
ISys 1 (ng/mL)	83	9	0	7.54541	13.8733	12.8571	16.4434	28.3027	30.6931	35.4403	44.4621	44.5925	40.801	35.5415	31.2744	28.4715	26.6195	25.1766	23.9523	22.8805	21.9349	21.1021	19.7102	41.6043	61.3858	57.181	64.8114	98.4463	105.468	117.704	141.834	141.996	130.989	116.016	103.616	95.0264	88.9316	83.9276	79.5226	75.5513	71.9491	68.6833	64.2029	114.845	134.147	118.785	129.512	184.472	194.739
ISys 1 (ng/mL)	7	9	0	5.40842	6.84557	5.54083	6.77529	13.5806	18.0323	19.8352	23.834	22.0595	18.337	14.207	11.1804	9.37895	8.31944	7.59542	7.06037	6.65445	6.34621	6.11563	5.50858	24.9849	27.9136	22.8347	25.3707	45.9923	50.5088	49.1251	50.3827	52.0857	53.735	55.2132	49.6991	35.7816	29.4901	26.0213	23.6854	21.9528	20.6247	19.6016	17.7168	59.2716	58.0071	46.8033	50.4557	84.9126	74.24
ISys 1 (ng/mL)	72	9	0	3.06451	5.41823	5.62461	5.78263	11.7624	19.1808	25.523	30.4095	29.0415	25.2711	20.6459	16.9038	14.3775	12.7148	11.5232	10.6299	9.94824	9.42717	9.03285	8.26333	20.1063	29.9114	31.234	36.7482	52.4407	56.8413	82.8235	125.427	121.523	102.877	83.5943	68.6616	58.3943	51.2911	45.9482	41.7641	38.4357	35.7752	33.651	30.6534	53.0429	73.0241	72.487	74.261	81.3179	128.589
ISys 1 (ng/mL)	59	9	0	5.66964	6.66713	5.90057	7.35191	12.1058	12.4638	14.043	17.0527	15.9168	13.3247	10.3478	6.76704	4.5746	3.27492	2.42824	1.85216	1.45267	1.17288	0.975447	0.835125	13.8508	16.473	14.7253	17.8932	24.1263	26.5973	28.5425	30.1549	31.4882	32.6061	32.3693	19.885	13.1263	9.3683	6.97368	5.35166	4.22467	3.43194	2.86961	2.46766	17.0863	26.1097	26.6095	30.7293	31.7958	32.9765
ISys 1 (ng/mL)	98	9	0	15.9295	17.5757	12.9189	16.8552	30.7862	32.6751	37.6039	47.1463	45.9082	40.4841	33.6984	28.3409	24.8374	22.5202	20.7619	19.3448	18.1807	17.222	16.4366	15.0366	53.0252	65.0418	51.0911	54.6389	99.5341	102.458	112.709	135.727	131.254	116.012	97.6405	83.0263	73.1299	66.2742	60.907	56.4868	52.7895	49.6874	47.0915	43.2112	151.198	116.39	87.2005	103.836	164.285	171.887
ISys 1 (ng/mL)	108	10	0	3.27077	5.35985	5.81757	7.92362	12.7699	13.1846	14.9923	18.6572	17.9376	15.5181	12.5409	10.1769	8.62108	7.61055	6.88392	6.33389	5.90913	5.57976	5.32608	4.81638	18.5299	22.4975	21.8924	25.9361	41.6517	43.8802	50.011	62.2361	60.6202	53.1459	43.647	35.9663	30.7809	27.2897	24.6826	22.6378	21.0034	19.6895	18.6345	16.8931	40.2132	51.0743	50.6392	59.4474	89.5602	92.4947
ISys 1 (ng/mL)	106	10	0	3.34965	5.96903	6.98138	11.558	22.8471	25.328	29.4723	37.191	36.2702	31.5314	25.4752	20.514	17.1477	14.9857	13.5276	12.5046	11.7673	11.227	10.8292	10.0469	31.5368	38.4972	36.5523	45.7314	76.5338	81.814	92.3794	113.347	110.068	96.1737	78.7224	64.5142	54.8575	48.5606	44.2017	41.0543	38.7205	36.9627	35.6301	33.2641	67.3162	89.1469	89.4481	108.563	167.8	176.894
ISys 1 (ng/mL)	112	10	0	13.6106	13.0181	11.189	17.675	34.3103	37.4759	43.2726	54.1781	53.2419	47.426	39.9784	33.8782	29.6407	26.7077	24.4693	22.6766	21.2152	20.0195	19.0459	17.0625	58.3289	56.5802	48.6204	62.5901	102.775	108.946	121.815	147.703	144.628	129.529	110.511	94.9258	84.0023	76.2904	70.2728	65.362	61.2937	57.9148	55.1192	49.0344	114.062	124.722	107.689	129.601	198.34	208.769
ISys 1 (ng/mL)	75	10	0	8.64067	7.78462	6.15304	7.16378	17.9669	21.0025	24.1012	31.1669	30.8123	27.3263	22.5937	18.9694	16.8914	15.7742	15.0485	14.5178	14.1121	13.8004	13.5662	12.6171	60.7192	57.0241	46.4809	45.868	101.527	126.432	137.953	167.779	164.88	146.958	124.439	106.782	95.4454	88.1521	82.6816	78.231	74.4942	71.321	68.6184	64.17	130.967	151.626	134.502	127.889	180.529	260.635
ISys 1 (ng/mL)	5	10	0	4.49006	5.95848	4.99567	6.27195	11.9648	12.9027	14.3525	17.4301	16.4421	14.0641	11.3193	9.19495	7.80358	6.88951	6.22035	5.70181	5.29094	4.96391	4.70513	4.23405	22.444	19.6133	15.2991	19.124	34.566	36.005	40.3976	49.3913	47.0008	40.5142	32.8861	26.9614	23.0626	20.462	18.5162	16.9769	15.7338	14.7252	13.9095	11.8977	35.0685	42.0364	34.6131	40.0674	67.2513	71.3517
ISys 1 (ng/mL)	81	10	0	1.24916	2.90876	4.33826	6.29253	9.92915	14.0765	23.3402	35.0226	31.497	25.4135	19.6655	15.6402	13.2429	11.8197	10.8505	10.1299	9.57126	9.1311	8.78384	8.02611	12.2453	16.2667	20.7695	30.231	54.8552	72.8802	83.7599	95.7213	89.3238	76.1307	61.5319	50.5071	43.5909	39.2697	36.1738	33.7666	31.8234	30.23	28.9167	26.5754	31.8717	39.0176	46.8777	62.002	111.823	134.377
ISys 1 (ng/mL)	30	10	0	6.14581	10.1876	9.97284	12.0861	23.2384	30.1179	32.5449	39.2595	37.1106	31.357	24.5773	19.332	16.0405	14.0886	12.8354	11.9851	11.3897	10.9668	10.6668	9.81463	33.7996	44.2816	41.9733	51.969	82.9201	85.7383	94.8453	115.148	109.927	94.1103	75.2445	60.4626	50.9941	45.2056	41.3611	38.665	36.7156	35.2827	34.2234	31.7632	67.0874	95.7032	93.0325	113.726	173.928	179.189
ISys 1 (ng/mL)	87	10	0	4.36879	5.77983	6.71363	10.6587	19.0646	20.175	22.992	28.5698	27.5744	24.0157	19.6487	16.1764	13.8634	10.4024	8.10334	6.57515	5.45161	4.58636	3.90666	3.36763	9.06968	16.4576	20.9687	24.2601	37.2219	56.3684	74.7429	89.0619	82.9169	71.382	58.6319	48.5891	41.7355	36.9885	33.3415	29.5769	25.1478	20.0071	16.5986	14.1618	23.5566	36.8461	45.5612	59.4212	108.176	114.401
ISys 1 (ng/mL)	88	10	0	2.53106	5.43683	7.64088	11.0284	27.1429	33.7053	37.1354	44.8942	44.8549	40.6656	34.6261	29.4444	25.8698	23.5	21.7662	20.4189	19.3436	18.4784	17.7844	15.992	22.0359	32.0025	40.572	52.4587	94.7197	138.55	156.365	181.532	180.562	164.993	143.417	124.514	110.661	100.674	92.8242	86.3557	80.9226	76.3296	72.4443	66.9201	76.5544	93.1492	107.51	133.847	221.289	250.534
ISys 1 (ng/mL)	4	10	0	5.44745	9.40559	10.2914	12.9813	22.7539	33.0712	49.1819	59.2812	56.5504	49.5705	41.3244	34.956	31.0117	28.6709	27.0674	25.8677	24.938	24.212	23.6504	22.2756	41.8994	60.0584	64.7845	72.794	109.191	156.533	185.953	210.461	201.546	178.884	152.657	131.907	118.092	108.953	102.115	96.6391	92.129	88.3737	85.2358	80.4515	125.604	146.14	146.935	159.375	251.606	294.273
ISys 1 (ng/mL)	20	10	0	8.64531	10.8076	11.0455	14.4469	25.5273	28.115	32.909	41.9953	42.5674	39.1255	34.074	29.8694	27.0439	25.1805	23.7715	22.6167	21.6391	20.8053	17.7467	14.9786	48.1726	59.3456	60.2309	69.3073	107.9	117.376	132.219	161.09	162.657	150.578	133.481	119.015	108.741	101.337	95.2652	89.9475	85.181	80.8832	71.0622	62.0274	114.034	136.236	137.213	150.71	212.978	225.166
ISys 1 (ng/mL)	13	10	0	11.6679	9.28656	7.19104	9.41468	21.3968	22.7433	25.9517	32.9607	31.9727	27.8259	22.6789	18.759	16.3953	15.0189	14.0799	13.3719	12.8159	12.3755	12.0306	11.1386	55.2611	46.1346	36.63	42.8208	82.934	88.0927	96.8599	109.753	116.34	99.9296	81.7166	68.3286	59.953	54.6678	50.8061	47.7437	45.2347	43.1583	41.4411	38.5087	117.051	98.9477	79.8827	88.6101	127.599	132.672
ISys 1 (ng/mL)	21	10	0	12.3887	11.4584	9.80606	13.8618	25.3085	27.8912	32.4695	41.1297	40.9888	36.5781	30.4218	25.1766	21.4795	18.9537	17.0983	15.6754	14.5619	13.6837	12.9912	11.8855	35.7762	47.3476	44.9139	52.9079	91.4278	98.8135	110.103	133.865	132.329	118.122	99.0471	82.771	71.046	62.7397	56.4288	51.4578	47.4826	44.2868	41.7175	38.2106	73.5128	100.356	96.2723	108.129	178.165	190.379
Time (h)			0	1.2	2.4	3.6	4.8	6	7.2	8.4	9.6	10.8	12	13.2	14.4	15.6	16.8	18	19.2	20.4	21.6	22.8	24	25.2	26.4	27.6	28.8	30	31.2	32.4	33.6	34.8	36	37.2	38.4	39.6	40.8	42	43.2	44.4	45.6	46.8	48	49.2	50.4	51.6	52.8	54	55.2
ISys 5 (ng/mL)	1	1	0	1.44414	7.22001	11.2507	13.3734	18.6156	24.6823	29.2869	34.4184	39.0454	41.4339	42.029	41.583	40.7553	39.9063	39.1435	38.4757	37.8905	37.3739	36.914	36.4387	36.5834	39.7386	42.2793	43.536	46.2562	49.6981	52.435	55.493	58.5578	60.5577	61.5215	61.7565	61.6369	61.4146	61.1825	60.9586	60.7434	60.5346	60.3309	60.0965	60.8854	64.4671	66.5989	67.5466	70.3966	74.4143
ISys 5 (ng/mL)	109	1	0	2.65874	10.2969	14.1665	15.489	24.8656	33.3535	37.9907	44.6254	49.6462	49.7966	46.818	42.6813	38.8186	35.8029	33.5755	31.9269	30.6803	29.7118	28.9394	27.7382	30.8745	44.104	50.277	52.0202	61.0285	71.8769	78.8496	86.2444	92.1371	93.2877	90.9812	86.9596	82.7591	79.1808	76.3204	74.0355	72.1758	70.6279	68.9777	66.8524	71.6651	85.2749	90.273	91.129	100.894	112.314
ISys 5 (ng/mL)	25	1	0	1.71549	5.9216	7.44763	7.6897	11.7527	14.5568	18.1575	21.4255	23.0473	21.7767	18.9178	15.7785	13.1925	11.3743	10.1447	9.29444	8.68052	8.21641	7.85158	7.48282	10.5954	19.2244	22.1189	22.0097	29.4342	34.9708	40.2929	47.285	50.5846	48.4319	43.2198	37.2589	32.1033	28.2467	25.4595	23.4092	21.85	20.6224	19.6268	18.6773	26.2268	38.0947	38.1502	35.6453	41.4104	54.8184
ISys 5 (ng/mL)	95	1	0	3.10367	6.12422	6.6283	7.27703	12.1776	18.0903	22.9347	28.9296	34.4991	37.4929	38.2636	37.6808	36.6093	35.54	34.5945	33.7655	32.9008	31.4413	29.8445	28.3204	32.1374	41.5466	45.1564	46.6073	55.1199	65.7957	74.5205	85.3264	95.7047	101.583	103.438	102.735	101.004	99.1465	97.4154	95.8219	94.284	92.1472	89.26	86.2222	90.344	102.855	107.253	108.591	118.29	131.202
ISys 5 (ng/mL)	53	1	0	0.352907	2.09744	4.08449	5.83964	9.53452	14.5039	18.8032	23.6241	28.1667	30.325	30.6389	29.8976	28.7591	27.5984	26.541	25.606	24.7856	24.0672	23.4381	22.8665	23.0136	25.7482	28.0953	29.7109	33.5869	39.4921	44.5039	49.738	54.9521	57.9357	58.8471	58.4346	57.4194	56.2519	55.1058	54.026	53.021	52.0031	50.8352	49.6496	48.8862	50.5264	52.9372	55.1056	59.8486	66.9224
ISys 5 (ng/mL)	60	1	0	1.1539	4.6124	6.74528	7.77218	11.5772	16.1535	19.3745	22.7629	24.9223	24.4406	22.2579	19.5014	17.0034	15.0733	13.6369	12.5528	11.7121	11.0414	10.3172	9.07302	10.5225	17.8408	21.8986	23.12	30.0112	38.261	43.2939	50.2297	54.918	54.229	50.1698	44.8643	39.8876	35.8792	32.7645	30.316	28.3467	26.5234	24.4058	22.4473	24.1689	33.9922	39.2985	40.8526	50.2213	61.9587
ISys 5 (ng/mL)	125	1	0	0.424852	2.34716	4.85238	7.76425	13.4943	18.8543	22.301	26.4106	29.93	30.9226	29.8921	27.7896	25.4898	23.4596	21.7901	20.4376	19.3397	18.4426	17.7042	17.0513	16.8664	19.1413	23.1572	27.7183	37.2404	46.2309	51.7313	57.2773	61.971	63.5342	62.5383	60.0524	57.0974	54.2739	51.7638	49.5713	47.6597	45.988	44.5206	43.182	42.1976	43.6102	46.9251	51.3823	58.5937	65.1286
ISys 5 (ng/mL)	8	1	0	0.445497	2.19553	4.01843	5.54284	8.64917	13.482	17.1674	20.6953	23.4598	24.2795	23.5878	22.0919	20.4314	18.9443	17.6929	16.6485	15.7714	15.0284	14.3935	13.8105	13.9258	16.8379	19.8306	22.1641	28.1042	36.1169	41.3415	46.7525	51.3316	52.9637	52.1856	50.0091	47.4046	44.9264	42.7196	40.7755	39.0579	37.5315	36.1675	34.8914	34.5641	37.4207	40.154	42.0512	46.6948	54.1051
ISys 5 (ng/mL)	39	1	0	1.00779	5.13512	8.73088	11.1297	14.5169	17.3036	19.6634	21.7657	23.6921	25.4848	27.1691	28.7601	30.266	31.6186	31.2782	29.9959	28.7006	27.5748	26.625	25.7831	28.2486	35.3413	39.5478	41.035	42.0071	42.7756	43.4626	44.115	44.7479	45.3653	45.9685	46.5579	47.1336	47.6961	48.2456	48.7823	49.3066	49.8187	50.3189	50.8072	53.2944	60.2031	64.7635	66.0806	66.118	65.8618
ISys 5 (ng/mL)	116	1	0	2.29588	6.09644	7.00932	7.35562	10.1129	13.6413	16.4698	19.8541	23.0292	24.6859	25.0098	24.5007	23.6731	22.8318	22.0664	21.3843	20.5663	19.5231	18.5029	17.5627	18.9803	24.9191	27.3863	28.045	31.7395	36.7407	40.7528	45.5092	50.1365	52.697	53.3392	52.7099	51.5328	50.2639	49.0552	47.9311	46.7909	45.3177	43.6197	41.9485	43.1476	49.9981	52.3703	52.6858	56.8015	62.8557
ISys 5 (ng/mL)	111	1	0	0.905237	4.52524	7.96534	10.5005	16.7426	23.494	27.9585	33.0069	37.3424	39.0703	38.7977	37.4585	35.8614	34.4204	33.2113	32.1984	31.3354	30.5853	29.9217	29.2764	30.8206	35.8666	38.8876	40.5775	45.8993	52.1595	56.8126	62.2729	67.4863	70.1799	70.6175	69.6303	68.1111	66.5974	65.2378	64.0277	62.9361	61.9351	60.8915	59.3277	59.8102	65.1862	68.6621	70.5617	76.6056	84.7625
ISys 5 (ng/mL)	12	1	0	0.513893	2.57373	4.43639	5.80782	8.76496	12.8825	15.9992	19.4152	22.5149	24.0481	24.2173	23.5432	22.5564	21.5725	20.6859	19.9026	19.21	18.5939	18.0424	17.5202	17.8634	21.4042	24.6662	26.7829	31.4387	38.085	43.1803	48.653	53.7818	56.5194	57.0765	56.2008	54.7124	53.1266	51.6178	50.2136	48.9071	47.686	46.5401	45.4213	45.8529	50.5074	53.7952	55.5678	60.9961	68.5655
ISys 5 (ng/mL)	66	1	0	0.658557	3.31947	5.80558	7.62964	11.7287	17.1184	22.3352	27.7531	32.0686	33.8293	33.6434	32.391	30.8404	29.4089	28.1983	27.1886	26.3382	25.6097	24.975	24.3778	24.8191	29.3187	33.7023	36.623	42.6734	50.2027	58.0555	65.6314	71.8546	74.739	74.9325	73.5127	71.5166	69.556	67.8089	66.272	64.9047	63.668	62.5327	61.423	61.9754	67.571	71.9185	74.4284	80.6598	90.1328
ISys 5 (ng/mL)	2	2	0	1.1741	5.24383	8.58031	10.5425	10.787	10.1428	9.52194	9.04361	8.70866	8.48824	8.35164	8.27395	8.2368	8.22724	8.23632	8.25793	8.28791	8.32337	8.36237	8.40359	11.9279	21.6087	27.4904	29.2944	27.9709	25.5598	23.417	21.6852	20.3134	19.2246	18.3495	17.6332	17.0352	16.5261	16.0847	15.696	15.3489	15.0355	14.75	14.488	17.4022	29.0259	38.6344	44.3706	48.5138	46.565
ISys 5 (ng/mL)	3	2	0	1.26128	4.54366	6.30052	7.23231	10.5115	15.1483	18.423	22.2151	25.4106	26.5538	26.0602	24.6811	23.1003	21.6757	20.4687	19.4487	18.5767	17.5865	16.2522	14.9597	15.5898	21.0372	25.3266	27.685	33.3495	40.3523	47.5922	54.7271	60.3508	62.5043	61.9357	59.7971	57.17	54.6618	52.4175	50.4183	48.6219	46.9866	45.0303	42.5445	42.2045	48.3248	52.9788	55.2255	61.1257	69.6292
ISys 5 (ng/mL)	33	2	0	3.28038	8.13722	9.28206	9.90051	16.0137	21.8532	25.6639	31.0055	35.0971	35.4847	33.2473	29.9067	26.6701	24.0531	22.0289	20.4459	19.1763	18.1312	17.2523	16.4123	19.8999	31.5816	36.717	37.7796	47.9702	59.6705	66.6027	75.7739	83.1378	83.9423	79.8464	73.4408	66.9556	61.4491	56.9739	53.3064	50.2381	47.6178	45.3426	43.1841	46.7669	62.166	68.9274	69.7674	82.0688	98.8083
ISys 5 (ng/mL)	18	2	0	2.11055	7.32944	9.66438	10.8224	18.0272	22.9034	24.9767	29.196	31.3174	29.3017	25.1941	20.9251	17.5913	15.3621	13.8877	12.8523	12.0711	11.4467	10.9289	10.3637	16.3129	28.3866	30.3028	30.1683	43.0115	52.5297	56.6552	64.8543	69.2932	65.5847	57.5094	48.8237	41.8024	36.9073	33.5249	31.0578	29.1431	27.5826	26.2702	24.9	36.4708	52.0009	52.1928	50.8726	69.2532	83.9319
ISys 5 (ng/mL)	6	2	0	0.794217	4.49301	8.39149	11.5094	18.1697	28.1883	35.1863	41.8545	47.1769	48.7347	47.5529	45.0413	42.3711	40.1123	38.3408	36.9687	35.8976	35.0186	33.7215	32.22	31.7039	35.3246	40.1868	44.3467	51.2402	60.4265	68.6959	75.3851	80.1281	81.804	81.3496	79.7725	77.8966	76.1729	74.7188	73.5135	72.5102	71.6657	70.8196	69.5345	68.8215	71.3795	74.5309	77.0924	82.0967	89.5271
ISys 5 (ng/mL)	113	2	0	1.24575	6.2713	10.8453	14.1473	21.2436	28.6703	34.17	40.4322	46.0128	48.8777	49.578	49.0304	48.0665	47.1452	46.3788	45.7531	45.2349	44.7953	44.4138	44.0307	45.4342	52.5019	57.8463	61.0838	68.6565	77.2307	83.8662	91.5552	98.8949	103.282	105.039	105.083	104.409	103.638	102.949	102.348	101.808	101.306	100.828	100.299	102.962	111.586	116.483	119.045	127.175	137.146
ISys 5 (ng/mL)	82	2	0	1.30101	5.8979	9.04958	10.6897	16.2872	23.1878	27.0537	31.8429	35.6191	36.0955	34.233	31.365	28.566	26.3132	24.6039	23.3087	22.3111	21.5265	20.897	20.3216	22.3396	30.2365	35.2304	37.6389	44.8213	54.087	60.6401	66.8806	71.6507	72.7418	71.1557	68.207	65.0208	62.192	59.832	57.8757	56.2373	54.8448	53.6445	52.5355	52.6113	57.6928	62.422	65.1276	71.2258	80.1635
ISys 5 (ng/mL)	102	2	0	1.59111	5.86312	8.05035	9.19614	14.24	18.5625	20.6057	23.8713	26.1128	25.2224	22.4252	19.1146	16.2657	14.1937	12.7578	11.75	11.0196	10.4709	9.9068	8.72918	9.97739	17.5595	22.5342	24.9894	33.0842	40.2581	43.5522	48.5743	52.3042	51.0951	46.6344	41.0696	36.0368	32.1617	29.3107	27.1912	25.5726	24.3	23.1721	21.0698	22.3076	31.2353	37.0861	39.4802	49.6442	59.7086
ISys 5 (ng/mL)	22	2	0	4.71868	7.33277	6.30974	5.67842	9.31352	11.8562	13.0459	15.4105	16.4039	15.0871	12.6392	10.1775	8.30205	7.07635	6.28257	5.7375	5.33555	4.50377	3.55473	2.87223	10.6356	17.2811	15.6808	14.0074	21.0807	25.989	28.171	32.7907	34.7277	31.9929	26.9465	21.8509	17.9386	15.3497	13.6473	12.4601	11.5734	10.0929	8.06913	6.55132	15.7736	27.0969	25.6938	23.0983	33.4907	41.0879
ISys 5 (ng/mL)	107	2	0	0.604894	2.22429	3.04726	3.70885	6.70228	9.26621	10.7897	12.9773	14.4312	14.134	12.6794	10.8308	8.75319	6.84049	5.39496	4.34649	3.58619	3.02717	2.6078	2.28583	3.42918	7.75182	10.9461	12.7632	19.2147	25.3094	28.4838	32.9436	36.1171	35.6526	32.6577	28.6664	24.8744	20.9394	17.2924	14.3991	12.1721	10.4537	9.11103	8.04454	9.39203	16.6515	21.8401	24.777	34.7677	43.49
ISys 5 (ng/mL)	24	2	0	1.29035	4.82576	6.6224	7.33924	10.6847	13.9016	16.1216	19.2915	21.7903	22.1874	20.9959	19.0641	17.1101	15.4712	14.1644	13.1232	12.2833	11.5961	11.0264	10.4929	12.8079	20.8292	24.2984	24.9941	31.3084	38.1103	42.889	49.2698	54.5806	55.9337	54.1795	50.7842	47.07	43.7312	40.8869	38.4731	36.4076	34.622	33.0644	31.6038	36.6853	47.1974	49.2792	48.6014	55.8974	64.715
ISys 5 (ng/mL)	45	2	0	2.46779	5.62489	6.43648	7.32023	12.7358	15.8608	17.077	20.1996	21.3749	19.328	15.8281	12.4676	10.0366	8.55066	7.65211	7.06576	6.64455	6.31769	6.05215	5.3392	7.3928	14.6259	18.5291	19.8806	29.8351	40.3	46.0229	52.3948	54.229	49.0875	40.7429	32.6598	26.6665	22.8642	20.4698	18.8527	17.6631	16.7255	15.9541	15.0483	20.8174	33.1642	38.0368	40.4722	59.9357	72.42
ISys 5 (ng/mL)	58	2	0	2.35923	8.36287	11.103	12.501	17.6398	23.6326	28.4052	34.0592	39.2718	42.1905	43.2102	43.0818	42.5025	41.8712	41.3105	40.8335	40.4291	40.0837	39.7859	39.4955	42.019	49.5912	53.0677	54.6348	59.911	66.3947	71.6008	77.4958	83.1416	86.7981	88.6984	89.4183	89.583	89.5944	89.5871	89.5814	89.5737	89.5585	89.5331	89.4563	92.3538	99.7642	103.005	104.469	109.791	116.604
ISys 5 (ng/mL)	23	3	0	1.99337	8.55183	12.4488	14.3055	20.8528	29.5769	35.0904	41.338	46.6168	48.422	47.659	45.6235	43.387	41.4658	39.9247	38.688	37.6757	36.827	36.0997	35.4197	37.184	44.4935	48.72	50.4735	56.1437	64.346	69.8449	75.7961	81.2816	83.9056	84.0881	82.792	80.9992	79.2885	77.8079	76.5359	75.4254	74.4371	73.5427	72.6674	73.9016	80.5789	84.9486	86.8862	92.4352	102.338
ISys 5 (ng/mL)	44	3	0	2.89394	6.50673	7.5081	8.00594	11.5274	15.5733	18.765	22.8522	26.5318	28.22	28.2387	27.2831	26.0182	24.8116	23.6902	22.187	20.6144	19.1565	17.8335	16.6309	18.6197	26.2142	29.929	31.3897	37.3103	44.3689	49.8829	56.5837	62.9059	66.2618	66.9807	66.0053	64.3294	62.5533	60.8516	58.7904	56.1775	53.5087	50.9332	48.4731	50.7809	59.1052	62.5992	63.6063	70.1915	78.8649
ISys 5 (ng/mL)	50	3	0	1.40685	4.93042	6.43609	6.97464	11.0062	15.4929	18.6067	22.767	26.0825	26.6846	25.2444	22.8477	20.4122	18.3723	16.7574	15.4839	14.4693	13.6499	12.9798	12.3613	17.6943	26.6682	27.9053	27.5767	35.8635	45.263	51.9487	61.075	68.7814	70.6666	67.9659	62.9232	57.548	52.8536	48.9758	45.7852	43.136	40.9112	39.0234	37.2787	43.2845	57.2926	61.3994	61.5044	73.8574	88.5669
ISys 5 (ng/mL)	89	3	0	1.36721	6.07744	9.73221	12.3472	17.9579	27.6576	34.8614	41.9131	47.8496	50.5873	50.7778	49.4905	47.6996	45.9526	44.4065	43.065	41.8993	40.8791	39.9794	39.1396	39.3135	43.8113	48.5876	52.2013	58.1347	68.4884	79.6861	89.9366	98.9402	104.132	105.889	105.322	103.69	101.808	99.9652	98.221	96.5783	95.0294	93.5669	92.1181	93.0637	99.6358	104.623	107.843	114.533	129.523
ISys 5 (ng/mL)	118	3	0	1.77999	6.03479	8.37757	9.95785	14.7735	19.6286	22.9068	27.1926	30.7324	31.4949	30.1311	27.7115	25.1485	22.9014	21.0492	19.5402	18.305	17.284	16.2386	14.7903	17.1863	25.3922	29.5399	31.6952	39.888	48.5866	54.4281	62.0415	68.5567	70.1234	67.7419	63.2673	58.3847	53.9803	50.2319	47.0694	44.3876	42.0937	39.7036	36.5742	38.5561	49.3015	54.8242	57.2326	68.1815	80.2121
ISys 5 (ng/mL)	99	3	0	1.76916	7.27344	10.4566	11.8563	16.5034	21.5174	24.8787	29.1877	32.8485	33.6683	32.267	29.733	27.0389	24.6865	22.7585	21.1942	19.9184	18.8683	17.996	17.2149	22.6585	31.9113	34.7614	34.707	41.2446	49.6249	55.5344	63.1261	69.8821	71.7663	69.6113	65.2267	60.3544	55.9485	52.2099	49.0689	46.4176	44.1624	42.2297	40.4698	44.2991	56.6023	61.69	62.3445	71.4993	83.119
ISys 5 (ng/mL)	127	3	0	3.74473	7.75274	7.8308	7.78408	12.6753	17.2351	20.0528	24.154	26.9245	26.4915	23.9568	20.7184	17.7928	15.5511	13.9017	12.6752	11.7405	11.0093	10.4242	9.86242	16.0544	26.2188	27.3791	26.624	35.6958	44.4576	49.742	56.687	62.4216	62.6352	57.418	50.4324	43.9625	38.8546	34.9709	31.9878	29.6455	27.7636	26.2219	24.772	29.6266	44.7392	49.4603	49.3876	59.4048	66.8341
ISys 5 (ng/mL)	124	3	0	0.27087	1.53895	3.24275	5.08105	8.43087	11.8293	12.32	11.7501	11.2248	10.8023	10.4736	10.2232	10.0357	9.89793	9.79885	9.72965	9.68339	9.65462	9.6391	9.63353	10.6031	13.8763	17.1556	20.0149	22.7327	26.2456	28.3449	27.4801	25.6072	23.931	22.5112	21.3108	20.2918	19.4213	18.6719	18.0214	17.452	16.9492	16.5016	16.1001	16.5058	20.0387	24.6734	29.5966	35.9524	40.893
ISys 5 (ng/mL)	15	3	0	3.05733	8.53273	9.34357	9.43953	14.1986	19.3965	23.1209	27.9447	31.9258	33.0688	32.0689	29.9928	27.749	25.7869	24.1658	22.8299	21.7167	20.777	19.6433	18.1151	24.4981	34.5502	35.3604	34.6573	40.8807	48.5644	54.1487	61.1861	67.3619	69.5742	68.5541	65.6905	62.3043	59.1287	56.3305	53.8809	51.7236	49.7869	47.214	44.2596	49.1175	61.695	63.2597	62.2058	69.6237	79.3521
ISys 5 (ng/mL)	104	3	0	1.34041	3.95373	4.46491	5.11992	12.1324	13.4984	13.4621	16.2364	15.7174	12.5719	9.16889	6.71132	5.3569	4.7276	4.38469	4.14879	3.96451	3.81397	3.6901	3.43533	6.66165	13.3242	14.0358	14.3908	24.9064	32.0223	31.9844	36.0869	34.3118	27.5232	20.3178	15.093	12.1739	10.7744	9.97952	9.41602	8.96828	8.59821	8.28993	7.71872	13.4338	24.1791	24.098	24.5032	42.5088	48.279
ISys 5 (ng/mL)	123	3	0	2.99368	9.75067	12.3144	13.1669	18.6571	24.6746	29.0115	34.2358	38.6848	40.4616	40.2292	38.9475	37.4153	36.0331	34.8718	33.8967	33.0637	32.3375	31.6932	31.0761	35.6078	42.2284	43.6815	43.8088	48.0712	53.4219	57.4244	62.0698	66.4129	68.6226	68.8419	67.894	66.5403	65.22	64.0443	63.0021	62.0634	61.2029	60.403	59.6032	63.2618	70.1738	71.7577	71.8176	75.6033	79.8819
ISys 5 (ng/mL)	40	3	0	1.68587	6.84123	10.2508	12.7485	21.4941	32.0696	37.7842	42.7638	44.5611	41.05	35.1846	29.3846	24.9663	22.0638	20.1675	18.846	17.8555	17.0692	16.4213	15.3386	16.508	26.8252	34.1349	38.8994	55.362	72.0553	79.3652	88.0974	92.9077	88.5672	79.2971	69.145	60.6984	54.5965	50.2443	47.0003	44.458	42.016	38.8031	35.3519	35.9997	49.1081	58.4893	64.0868	83.6123	105.698
ISys 5 (ng/mL)	17	3	0	0.387613	1.89888	3.83097	6.11406	10.8105	15.832	19.6717	24.0567	28.0909	30.24	30.779	30.3409	29.5353	28.6628	27.5046	26.2979	25.1894	24.2021	23.3259	22.5441	22.3493	24.0444	26.868	30.0279	34.8228	39.5233	42.7891	46.0382	48.9225	50.489	50.9575	50.7405	50.2309	49.6368	48.8369	47.9404	47.0618	46.2296	45.4454	44.7042	44.3928	45.3105	47.0079	48.8464	51.893	55.2879
ISys 5 (ng/mL)	122	4	0	3.01728	7.57465	6.52178	5.72553	10.7527	13.8361	14.8461	18.2364	19.8518	18.2193	15.021	11.8052	9.39349	7.87566	6.95789	6.38211	5.99563	5.71758	5.5067	5.245	17.7424	25.7503	20.2093	17.3555	28.9894	35.1642	37.8019	45.0274	48.6096	45.0093	37.7805	30.3396	24.6078	20.8665	18.4998	16.9424	15.8506	15.0364	14.4002	13.6827	33.2503	46.9359	38.3068	32.9485	50.3763	58.692
ISys 5 (ng/mL)	120	4	0	1.42821	5.19783	6.49149	6.76228	9.60176	12.7671	15.1592	18.1388	20.7423	21.6482	21.1887	19.9769	18.5746	17.2866	16.1834	15.2509	14.4616	13.79	13.2159	12.6974	15.8535	21.6783	22.3903	21.9262	24.9023	28.9932	31.9722	35.5268	38.6913	39.812	39.239	37.6785	35.8069	34.0116	32.4013	30.9759	29.714	28.5934	27.5946	26.6711	30.2401	35.1199	35.0704	34.1646	36.8862	41.083
ISys 5 (ng/mL)	46	4	0	1.41951	8.34477	14.7941	16.8849	25.0327	32.8739	37.4567	43.7399	48.5803	48.8269	46.0808	42.2185	38.5969	35.7538	33.6423	32.0708	30.8751	29.9394	29.1864	28.5062	30.2412	39.9044	46.1732	47.5168	53.5885	60.5498	64.8117	69.9346	74.3073	75.2804	73.6535	70.7046	67.581	64.8881	62.7164	60.972	59.5483	58.3616	57.3526	56.4115	56.4012	62.8494	70.735	73.6306	80.3731	88.1094
ISys 5 (ng/mL)	62	4	0	0.760992	3.58853	6.02954	7.69178	11.9219	16.3865	19.4895	23.2214	26.4718	27.7299	27.3663	26.0915	24.5672	23.1547	21.9359	20.8951	20.0017	19.0638	17.8005	16.544	16.7164	21.1294	25.0889	27.6828	33.8304	41.3878	47.139	53.2994	58.7632	61.2144	61.1063	59.4331	57.1892	54.9584	52.9118	51.0605	49.3829	47.6259	45.6871	43.4975	42.6628	46.7624	50.9385	53.6281	60.7525	69.9133
ISys 5 (ng/mL)	14	4	0	2.27391	4.71015	5.36102	5.61482	8.31026	10.9941	12.9215	15.6702	17.84	18.2443	17.301	15.7224	14.112	12.7534	11.6051	10.1721	8.80879	7.66215	6.7164	5.93159	7.07742	12.3676	16.4376	18.9005	26.4676	33.6743	38.7055	45.4944	51.3864	53.3548	52.1388	49.1803	45.8197	42.7675	40.1506	37.8979	35.2065	32.0914	29.1864	26.5986	27.3376	35.8302	41.8566	45.3157	55.211	65.5988
ISys 5 (ng/mL)	42	4	0	1.74425	7.36972	10.8655	13.0364	21.6943	27.9933	31.1887	36.1645	39.6966	39.2425	36.3698	32.7392	29.4888	27.0084	25.1791	23.7975	22.7129	21.8283	21.0836	20.3751	27.8847	36.1316	36.5965	36.0572	43.4123	51.1513	55.7594	61.854	66.7465	67.0678	64.1496	59.8308	55.6095	52.1461	49.4197	47.2386	45.4421	43.9197	42.5999	41.3401	42.763	51.3881	56.2639	58.3975	68.9076	79.2614
ISys 5 (ng/mL)	97	4	0	1.74632	6.82688	9.40281	10.3665	15.3443	19.9142	22.6827	26.6557	29.6429	29.6341	27.5177	24.5456	21.7061	19.4202	17.6658	16.3146	15.2548	14.4064	13.7144	13.0738	15.952	25.5827	29.7682	30.7244	39.2859	48.1633	53.6569	61.2054	67.2863	67.8116	64.1589	58.568	52.9491	48.2004	44.372	41.2785	38.7416	36.6271	34.8397	33.19	35.3987	47.0825	53.4815	55.0237	65.1279	79.4508
ISys 5 (ng/mL)	115	4	0	1.01397	4.62082	6.98834	8.19913	12.0943	16.0831	18.7597	22.2044	25.072	25.7021	24.599	22.6214	20.5339	18.7226	17.2391	16.0317	15.0426	14.2249	13.5433	12.9267	14.0921	20.9268	24.7493	26.1068	32.0205	38.7149	43.2473	48.9678	53.997	55.3529	53.6886	50.3565	46.6559	43.2973	40.4261	37.9907	35.9152	34.1336	32.5941	31.1554	31.7607	39.7151	44.4538	46.0248	53.5994	62.6489
ISys 5 (ng/mL)	129	4	0	2.98243	5.3225	4.97602	4.6783	7.56525	10.6014	12.5276	15.1714	17.006	16.8545	15.3507	13.3411	11.469	9.99242	8.87972	8.03972	7.39625	6.66985	5.66031	4.78324	8.8156	16.7506	17.3212	16.3816	21.842	27.7921	31.4543	36.6468	40.4118	40.137	37.0123	32.7244	28.6204	25.2792	22.6738	20.638	19.0255	17.7167	15.7635	13.6058	22.5755	32.5171	31.4899	29.334	37.3368	46.3124
ISys 5 (ng/mL)	85	4	0	1.40761	3.9707	5.21731	6.18107	10.3682	14.9992	18.4227	22.6995	26.3873	27.6626	26.9824	25.2423	23.2719	21.5096	20.0351	18.8108	17.7867	16.9213	16.1831	15.4979	15.8849	20.1266	24.0139	27.1879	36.3527	46.0137	52.8254	61.1516	68.5085	71.1077	69.7344	66.1009	61.8662	57.9452	54.5394	51.6029	49.0554	46.8266	44.8615	43.023	42.4913	47.3935	52.7646	56.9918	69.963	84.759
ISys 5 (ng/mL)	68	4	0	2.65408	10.3401	13.584	14.1955	22.177	29.8786	33.6771	39.2563	43.1772	42.3068	38.5319	33.93	29.9344	26.999	24.9125	23.3801	22.1982	21.2448	20.4492	19.6713	23.8999	38.0676	43.3614	43.3387	53.7594	66.7529	73.6659	83.0554	90.2749	89.3891	83.0627	74.8137	67.3208	61.5697	57.297	54.0266	51.4137	49.2457	47.3959	45.6064	50.6066	70.0256	77.2508	76.44	91.5989	109.383
ISys 5 (ng/mL)	128	4	0	1.10162	3.52364	4.69475	5.36631	7.83066	10.4285	12.4249	15.0505	17.2656	18.0297	17.6028	16.5184	15.265	14.1075	13.1055	12.2058	11.0649	9.91822	8.89249	8.00061	10.9345	16.0239	17.8489	18.5127	21.9195	25.201	28.1337	30.7859	33.2053	35.4281	37.4839	39.3937	40.3159	38.5005	36.1439	33.5887	30.5768	27.7209	25.1741	22.9333	25.1929	33.3637	36.9259	38.2068	40.7259	42.9309
ISys 5 (ng/mL)	100	4	0	1.65794	5.06062	6.0537	6.27801	9.49151	13.2349	15.8538	19.3126	22.1333	22.8973	22.0487	20.3792	18.5883	17.0294	15.7494	14.7062	13.8517	13.1465	12.5608	12.0193	16.4089	24.3883	26.2262	26.2084	32.3387	39.6524	44.9407	51.5457	57.23	59.3337	58.5366	56.0785	53.1209	50.3164	47.8277	45.6434	43.7229	42.0267	40.5225	39.1087	43.0103	52.348	54.7238	54.5011	61.0035	69.569
ISys 5 (ng/mL)	11	5	0	2.568	8.57182	10.4379	10.7597	15.5245	20.3582	23.5826	28.0688	31.553	32.0195	30.3492	27.7572	25.2014	23.097	21.4344	20.1038	19.0113	18.0915	17.3016	16.3842	20.0444	30.9186	34.0543	33.9426	41.477	49.7939	55.379	63.0384	69.3358	70.5334	67.8916	63.3922	58.7232	54.6891	51.3482	48.5544	46.1691	44.092	42.2552	40.4217	44.6569	59.0733	62.2822	61.2479	70.8119	82.0711
ISys 5 (ng/mL)	16	5	0	2.1071	6.27346	7.47729	7.88318	12.0843	16.7472	19.9488	24.0491	26.9931	27.0003	24.9777	22.1203	19.3703	17.1445	15.4429	14.1522	13.1655	12.4021	11.8045	11.272	13.5289	21.6816	26.0547	27.6795	35.8511	45.1549	51.6479	59.4166	65.7896	67.0076	64.2362	59.4871	54.4804	50.0592	46.3672	43.3134	40.7787	38.6603	36.8769	35.2871	36.4102	44.8974	50.014	51.8954	60.7023	69.2865
ISys 5 (ng/mL)	84	5	0	0.442559	2.44614	4.48322	6.04041	8.96241	12.9227	16.1916	19.6013	22.7068	24.4542	25.0307	24.869	24.3999	23.8799	23.3937	22.9541	22.5566	22.1945	21.7351	21.0829	22.0023	25.049	26.8655	27.9282	30.6259	34.5514	37.9761	41.5179	44.7732	46.6981	47.4466	47.4169	47.0254	46.5333	46.0352	45.5508	45.0749	44.4838	43.8064	43.0013	42.5769	44.2027	46.0806	47.318	49.514	52.7909
ISys 5 (ng/mL)	32	5	0	0.774322	3.68252	5.84665	7.21103	10.8648	14.8674	17.8022	21.2885	24.3575	25.5964	25.3286	24.1931	22.7948	21.4738	20.319	19.3251	18.4697	17.7304	17.0887	16.4984	17.5343	22.7518	25.6632	27.113	32.2075	38.1298	42.4531	47.6112	52.2978	54.2761	53.9289	52.1646	49.9006	47.6804	45.6639	43.861	42.2504	40.8075	39.5112	38.2935	38.7079	44.09	47.7291	49.3996	55.674	63.19
ISys 5 (ng/mL)	77	5	0	3.32873	13.9653	18.7791	20.2721	31.7874	41.187	45.8677	53.3847	58.5785	57.6494	53.2372	47.8894	43.2673	39.8908	37.5174	35.7986	34.4877	33.4348	32.5532	31.6653	35.4772	52.4573	60.4065	62.2538	75.8241	88.3954	94.6753	103.157	109.587	109.429	104.983	98.8191	92.9598	88.2938	84.7326	81.9503	79.6872	77.775	76.1127	74.4595	79.5063	97.725	104.195	105.123	119.227	133.274
ISys 5 (ng/mL)	130	5	0	2.57951	6.80749	8.72835	10.061	15.2591	21.0819	25.4542	30.7606	35.5809	37.8128	37.9026	36.7723	35.2945	33.949	32.8447	31.9566	31.2401	30.6565	30.1764	29.7406	30.686	35.9537	39.9547	42.8472	49.5371	57.0655	62.5998	68.4166	73.7631	76.7283	77.6337	77.2429	76.3329	75.3837	74.5542	73.8594	73.2804	72.7944	72.3825	71.996	71.894	74.1475	77.3613	80.3699	86.5006	94.5153
ISys 5 (ng/mL)	103	5	0	0.668206	3.4221	5.87255	7.53803	9.83925	13.46	18.5501	24.483	29.3845	32.0004	32.8791	32.7075	32.0882	31.3763	30.6978	30.079	29.5201	29.0134	28.3225	27.4141	27.4031	30.768	34.1131	36.3113	39.1112	43.3776	48.7777	56.4177	63.4687	67.5581	69.4198	69.8678	69.6297	69.1611	68.639	68.1103	67.5863	67.0687	66.2858	65.0879	64.8889	68.6328	72.0672	74.1881	77.159	82.6784
ISys 5 (ng/mL)	57	5	0	0.534171	2.44917	3.86339	4.77578	7.02225	10.2459	12.0082	12.189	12.1469	12.1259	12.1586	12.2375	12.3495	12.4833	12.6301	12.7834	12.9382	13.0895	13.054	12.3453	14.3494	18.1733	19.4213	19.6297	22.4757	27.0695	27.4903	25.9106	24.4408	23.2356	22.2669	21.4877	20.8564	20.34	19.9132	19.5565	19.2551	18.9976	18.7754	18.5816	20.7352	26.1024	29.8648	32.022	36.5806	42.4946
ISys 5 (ng/mL)	91	5	0	1.40224	6.49664	10.0745	11.7195	12.307	12.5375	12.7334	12.9682	13.2435	13.5453	13.8604	14.179	14.4948	14.8039	15.1038	15.3934	15.6718	15.939	16.1949	16.4396	18.8792	27.5395	33.3676	35.7569	37.9956	37.6091	36.384	35.3332	34.4767	33.7683	33.166	32.6387	32.1649	31.7303	31.3252	30.9431	30.5799	30.2328	29.9	29.5801	32.4468	42.4966	48.5456	50.5822	50.3335	49.0616
ISys 5 (ng/mL)	71	5	0	1.56948	6.47161	9.74572	11.4296	17.1874	23.6926	28.1792	33.7034	38.6397	40.6981	40.4213	38.8439	36.9243	35.1747	33.6947	32.4447	31.3706	30.4296	29.5913	28.7802	30.7619	39.2263	44.7588	47.3582	55.6915	65.4778	72.5187	80.7667	88.3846	92.1239	92.5735	91.0013	88.6777	86.3564	84.2445	82.3356	80.5866	78.9593	77.4274	75.8966	77.1335	85.887	91.7854	94.5048	103.393	113.935
ISys 5 (ng/mL)	31	5	0	1.30591	5.52002	7.80841	8.77742	14.2229	15.1288	12.8315	11.1794	10.1181	9.45107	9.03875	8.78963	8.64488	8.56689	8.53163	8.5237	8.53319	8.5537	8.58106	8.61255	15.5925	30.3286	34.6987	35.146	37.7714	33.4857	28.9872	25.644	23.1885	21.3687	19.9974	18.9422	18.111	17.4398	16.8841	16.4132	16.0055	15.6459	15.3235	15.0308	22.0853	42.9869	53.2075	56.4629	68.3424	75.9465
ISys 5 (ng/mL)	29	5	0	1.28244	4.06769	5.33126	6.03242	8.50329	11.6147	14.1294	17.0621	19.8625	21.4419	21.9211	21.6901	21.1566	20.5712	20.0217	19.5242	19.0771	18.675	18.3125	17.9701	18.4744	21.5955	23.8495	24.9929	27.7684	31.609	34.7473	38.0808	41.2317	43.0678	43.7012	43.5293	42.9815	42.3327	41.6871	41.0696	40.4839	39.9286	39.4016	38.8846	39.0728	41.7732	43.6334	44.443	46.9713	50.6584
ISys 5 (ng/mL)	61	5	0	1.23539	4.79801	7.32521	9.53786	16.023	20.3101	21.9199	25.4279	27.5626	26.0273	22.4866	18.6522	15.5938	13.5428	12.2172	11.324	10.6806	10.1868	9.7899	9.36816	12.5475	20.1934	25.5661	28.796	39.6325	47.9145	51.1325	57.267	61.4558	59.1054	52.8298	45.5801	39.403	34.9192	31.7734	29.4932	27.7543	26.364	25.2125	24.0832	27.41	37.6865	44.8349	48.9224	62.5239	73.9215
ISys 5 (ng/mL)	19	6	0	1.06876	5.30901	9.10659	11.7083	17.5947	23.7585	28.0493	33.1967	37.7705	39.5394	39.0752	37.3931	35.4107	33.6215	32.1357	30.6833	28.9011	27.1921	25.6754	24.3455	24.7813	31.115	37.1079	40.746	47.8073	55.6483	61.2225	67.5449	73.4704	76.3257	76.4924	74.9902	72.8858	70.8319	69.0076	66.9885	64.5442	62.0969	59.828	57.7551	57.9926	65.0585	71.2708	74.7048	82.2421	91.3465
ISys 5 (ng/mL)	110	6	0	1.14649	5.00532	7.23928	8.32717	11.928	17.0912	21.4321	26.1355	30.4643	32.8664	33.6066	33.3051	32.5774	31.7907	31.0664	30.4225	29.8528	29.3473	28.897	28.472	29.7799	35.3864	38.5036	39.6142	43.3443	49.0313	53.7995	59.1886	64.5818	67.9745	69.39	69.4191	68.7858	67.9713	67.1534	66.3713	65.6294	64.9257	64.2574	63.5884	64.8437	71.3998	75.0337	76.1756	80.7911	88.0774
ISys 5 (ng/mL)	27	6	0	1.94629	6.26742	7.85778	8.41935	12.523	16.5235	18.8772	22.1648	24.7245	24.7099	22.8766	20.2913	17.8176	15.834	14.3282	13.1871	12.3103	11.6248	11.08	10.5878	13.8743	21.2554	24.2428	24.8819	31.2337	39.0385	43.5052	49.116	53.6912	54.0091	51.1459	46.776	42.3552	38.6002	35.5788	33.1559	31.1922	29.5791	28.2372	27.0237	29.0809	38.148	42.7926	43.9667	52.458	62.2812
ISys 5 (ng/mL)	49	6	0	2.30518	5.70284	6.9704	7.65635	11.3967	15.2006	17.6455	20.9041	23.4808	23.7322	22.2781	20.0545	17.8413	16.0012	14.5518	13.4138	12.5104	11.783	11.1894	10.6517	13.1457	19.781	22.7253	23.9679	30.3313	36.923	41.04	46.5508	51.1011	51.6241	49.0591	44.9844	40.793	37.1774	34.2169	31.8015	29.8124	28.1553	26.7595	25.4906	27.6529	35.4053	39.6068	41.1888	49.8649	59.3682
ISys 5 (ng/mL)	51	6	0	0.741308	3.69096	6.06992	7.63841	11.2395	15.566	19.0804	23.0371	26.7344	29.0149	30.0816	30.3758	30.322	30.1731	30.02	29.8838	29.7672	29.6686	29.586	29.5044	30.6112	33.8588	35.6591	36.6587	39.1455	42.2908	44.8788	47.6785	50.392	52.2399	53.3	53.8204	54.0764	54.2505	54.41	54.5681	54.7245	54.8767	55.0225	55.1463	55.8821	58.6866	60.5921	61.7166	64.2383	67.435
ISys 5 (ng/mL)	65	6	0	1.28975	4.42163	6.01922	6.49368	7.6736	8.69249	9.56143	10.321	10.9961	11.6035	12.1561	12.6637	13.1334	13.5705	13.9784	14.3561	14.118	13.1405	12.1534	11.2809	12.6642	18.0114	20.6087	20.5275	20.1351	19.8243	19.6236	19.5123	19.466	19.4647	19.4944	19.5451	19.6097	19.6831	19.7618	19.8433	19.9257	20.0078	20.0887	20.1678	23.4945	31.7557	34.9562	33.7466	31.9746	30.4958
ISys 5 (ng/mL)	37	6	0	3.14992	9.06244	9.28505	8.56285	13.0516	17.9274	20.6596	24.6348	27.4942	27.1143	24.6446	21.4849	18.6641	16.5483	14.9915	13.0201	11.0966	9.5769	8.40257	7.47395	15.1761	29.1984	29.6794	27.5377	35.8411	45.8638	51.5767	59.2892	65.3856	65.4159	61.2208	55.2785	49.5874	45.0019	41.2963	36.8452	32.6075	29.0982	26.2282	23.8407	32.2065	51.8717	53.7878	50.8979	61.2294	74.9119
ISys 5 (ng/mL)	93	6	0	2.13413	9.67864	15.1704	18.2067	26.3788	37.204	43.6437	50.1886	55.2527	56.5913	55.5046	53.3765	51.1939	49.377	47.9436	46.7995	45.858	45.0573	44.3565	43.6889	44.5169	50.3584	54.5874	56.6861	62.3893	69.7529	74.4812	79.6551	84.3669	86.5734	86.7437	85.7238	84.3396	83.06	81.9832	81.0727	80.2804	79.5708	78.9209	78.2618	80.4878	87.3001	90.6571	91.9612	98.1524	106.061
ISys 5 (ng/mL)	70	6	0	2.57484	7.93412	10.3846	11.7401	13.4785	14.8571	16.057	17.1514	18.1658	19.1123	19.9995	20.8345	21.6228	22.3694	23.0783	23.7528	24.3958	25.0092	25.5935	25.7654	27.8797	35.9627	40.0989	41.3788	41.2718	40.7442	40.2262	39.8097	39.4978	39.2747	39.1233	39.0289	38.9795	38.9654	38.9788	39.0136	39.065	39.1289	39.2022	39.2825	43.0632	55.1082	62.3452	64.8883	67.3512	67.2336
ISys 5 (ng/mL)	78	6	0	1.50151	6.38987	9.67376	11.6612	18.5282	24.4508	28.0954	33.0723	37.1044	37.7246	35.9238	33.0414	30.1565	27.7608	25.8795	24.4075	23.1822	21.5157	19.802	18.3063	20.758	29.7197	33.5786	35.2088	41.923	49.2794	53.9039	58.9319	63.053	64.0949	62.8203	60.3123	57.5149	54.9376	52.6984	50.6724	48.2979	45.8912	43.6841	41.6981	41.3822	46.0753	49.8629	51.8263	56.6163	62.7645
ISys 5 (ng/mL)	28	6	0	0.638054	2.89681	4.73556	6.41799	10.4025	14.5859	17.7268	21.4453	24.7534	26.2568	26.2525	25.3588	24.1732	23.0318	22.0186	21.1289	20.3435	19.6449	19.0192	18.4225	21.3188	26.0579	27.6309	28.2576	33.1195	39.9444	45.0584	50.8729	56.1465	58.751	59.0705	57.9575	56.2733	54.5335	52.8948	51.3734	49.9579	48.6346	47.3925	46.1772	48.216	54.0825	55.6403	56.2427	61.6519	68.7418
ISys 5 (ng/mL)	35	6	0	1.37505	6.09814	9.01782	10.9397	15.5032	20.6405	24.521	28.615	32.1882	34.1212	34.8053	34.7962	34.5491	34.3018	34.1179	33.9963	33.924	33.8882	33.8206	33.5937	33.8186	35.7095	37.471	38.742	41.2009	44.0831	46.3888	48.8934	51.3415	53.019	53.9862	54.4792	54.7633	55.0061	55.2617	55.5353	55.8219	56.1159	56.4067	56.5899	57.0938	59.0814	60.991	62.4417	65.3322	68.982
ISys 5 (ng/mL)	90	6	0	1.40561	4.7303	6.21867	7.01762	10.3859	14.2024	17.2156	20.9962	24.3779	25.9508	26.0052	25.162	24.0157	22.903	21.9125	21.0444	20.2825	19.6102	19.0141	18.4178	19.8057	26.0461	29.3441	30.6823	35.8986	42.0685	46.8725	52.6979	58.0626	60.7832	61.2202	60.2182	58.6318	56.9746	55.4067	53.9504	52.5984	51.3391	50.1628	49.0068	49.9731	56.6078	60.1632	61.3839	67.0132	74.0926
ISys 5 (ng/mL)	117	7	0	0.696875	2.67757	4.10421	5.20357	9.21997	16.2822	19.2208	21.9159	23.0264	21.2611	17.9722	14.5344	11.7948	9.93215	8.71769	7.9071	7.33888	6.91877	6.59406	6.257	8.07051	12.567	15.3706	17.8145	29.9669	40.5986	44.0807	49.1489	51.8351	48.584	41.9237	34.6792	28.7149	24.5106	21.656	19.6697	18.2232	17.119	16.2434	15.3741	16.7195	22.8186	27.2059	30.8582	46.1471	65.1337
ISys 5 (ng/mL)	67	7	0	3.23049	7.86008	8.84797	9.04482	13.1225	17.9098	21.4352	25.9004	29.8552	31.4234	31.0602	29.6241	27.9092	26.3441	25.0227	23.9226	23.0049	22.2351	21.5858	20.9975	26.0874	33.6979	35.3557	35.395	40.0185	46.0788	50.482	55.3973	59.7607	61.6986	61.6491	60.407	58.7179	57.016	55.4395	54.006	52.7056	51.5238	50.447	49.4334	50.4902	55.4505	57.4013	57.5529	60.1455	65.5442
ISys 5 (ng/mL)	105	7	0	0.574269	3.02373	5.64153	8.49614	18.3943	28.8428	35.4391	42.2607	47.9451	49.8208	48.8701	46.5064	43.893	41.6093	39.7639	38.2952	37.1208	36.1713	35.3936	34.7161	34.6212	36.8317	39.7178	42.8884	48.5243	55.61	62.0918	67.4423	71.5542	73.2641	73.1004	71.8311	70.1946	68.6409	67.3066	66.1862	65.2437	64.4438	63.758	63.1305	63.13	65.2398	67.8302	70.79	77.5189	84.9057
ISys 5 (ng/mL)	64	7	0	4.30392	7.08659	6.8752	6.76858	9.54843	12.8602	15.4162	18.6434	21.4474	22.5599	22.2961	21.2569	20.0004	18.8292	17.8089	16.9275	16.1328	15.0393	13.8798	12.8181	17.2455	24.3138	24.7361	24.2782	28.2588	32.814	36.8075	40.381	43.5982	46.5065	48.7104	47.898	45.8279	43.671	41.6947	39.9222	38.3299	36.5785	34.4146	32.2473	38.0281	46.5055	46.0935	44.8715	47.6486	50.6199
ISys 5 (ng/mL)	114	7	0	3.82073	12.5172	14.6573	14.7143	20.3937	28.9239	33.5415	39.1069	43.2389	43.6829	41.5626	38.3748	35.2752	32.7565	30.8033	29.2792	28.0646	27.0739	26.248	25.4746	29.9694	42.6652	45.896	45.5637	53.0953	61.1032	66.3682	73.1971	78.8789	80.188	78.1796	74.5005	70.5933	67.1868	64.37	62.0361	60.0711	58.3868	56.9196	55.5247	62.2201	75.6188	76.9585	75.6721	82.9619	93.1043
ISys 5 (ng/mL)	121	7	0	0.353632	1.82996	3.55083	5.27273	10.0989	17.7169	22.8629	27.9992	32.2001	33.7536	33.2192	31.5581	29.6348	27.906	26.4593	25.2547	24.2373	23.3624	22.5976	21.5593	21.0665	23.7388	27.2707	31.0494	41.2708	53.0361	60.6825	68.8375	75.8474	78.42	77.2898	74.0536	70.2522	66.7355	63.6872	61.0527	58.7461	56.6952	54.6506	51.8195	50.8999	54.7632	59.0581	63.6843	75.357	90.1274
ISys 5 (ng/mL)	9	7	0	0.781693	3.75976	6.38088	8.36629	13.0084	18.1752	22.1353	26.6862	30.8941	33.1113	33.6285	33.1041	32.1818	31.2378	30.3884	29.6447	28.9949	28.4247	27.9219	27.4511	28.4967	33.0488	36.4362	38.4065	42.8172	48.1468	52.2678	56.889	61.3441	63.948	64.8491	64.6063	63.8439	62.9679	62.1232	61.3363	60.6051	59.923	59.2842	58.6523	59.4752	63.9555	67.2187	69.0112	73.4767	79.251
ISys 5 (ng/mL)	38	7	0	0.632388	3.64937	7.35389	10.114	14.1262	13.9527	12.1942	10.7786	9.78306	9.08547	8.59381	8.24328	7.98926	7.80141	7.65919	7.54876	7.46074	7.38879	7.32861	7.27727	8.5975	15.3359	23.7643	28.6813	29.8114	27.6796	24.6767	22.0588	20.0477	18.4949	17.2764	16.3004	15.5003	14.8293	14.2541	13.7513	13.3046	12.9021	12.5356	12.1989	13.8911	24.1136	33.3016	33.4306	30.9006	28.141
ISys 5 (ng/mL)	34	7	0	0.583366	2.27071	3.45421	4.54672	9.49592	15.0107	18.8028	23.1588	26.7095	27.5979	26.4238	24.2073	21.8358	19.7628	18.0689	16.7037	15.5993	14.6976	13.7123	12.3768	12.1575	15.6763	19.5645	22.931	32.8813	44.3539	51.0793	58.3329	64.134	65.0016	62.0074	57.0596	51.8682	47.3087	43.5245	40.4094	37.8292	35.6708	33.7297	31.0126	30.6401	36.0868	40.9959	45.2024	57.9053	69.5205
ISys 5 (ng/mL)	126	7	0	3.7589	8.60646	9.55785	9.6862	10.2146	10.5186	10.7706	11.0275	11.2985	11.5788	11.8622	12.1436	12.4195	12.6877	12.9471	13.197	13.4372	13.6677	13.8886	14.1001	22.0105	32.8104	34.7701	32.6316	29.8169	27.4278	25.5977	24.2497	23.2689	22.553	22.0237	21.6246	21.3166	21.0726	20.8743	20.7091	20.5686	20.4466	20.3391	20.2432	24.3013	38.8597	47.605	50.1564	57.1958	57.8606
ISys 5 (ng/mL)	43	7	0	0.392466	1.96969	3.84831	5.57704	9.73321	14.2756	17.5162	21.2641	24.7542	26.5725	26.8897	26.2646	25.2917	24.3286	23.4785	22.7445	22.11	21.5575	21.0731	20.6151	21.3866	24.6113	28.2283	31.2937	37.4244	44.2645	49.3672	54.8199	59.9581	63.0171	64.1944	64.1106	63.4398	62.6203	61.8136	61.0523	60.3354	59.6558	59.0071	58.3529	58.2259	60.35	63.3066	66.2244	71.9973	78.6341
ISys 5 (ng/mL)	47	7	0	16.684	10.2541	5.04191	6.79547	16.3392	17.9522	18.5588	23.2163	22.2504	17.7606	13.0551	9.76812	8.0286	7.24995	6.81021	6.48855	6.2255	6.00354	5.04805	3.44421	27.058	28.6331	19.1114	19.9827	40.0019	41.6735	40.7908	49.9776	48.8418	39.9559	30.3151	23.289	19.3464	17.4317	16.2995	15.4615	14.7739	14.1907	13.1458	10.9738	29.2471	46.984	36.4364	35.2296	63.6102	64.0421
ISys 5 (ng/mL)	92	7	0	1.62216	4.53318	4.89617	5.04476	9.03269	11.8606	13.2076	15.8118	17.0097	15.6748	13.054	10.378	8.33873	7.03066	6.22002	5.69731	5.33709	5.07175	4.86609	4.61606	10.4095	16.4037	15.7297	14.7268	22.8579	29.09	32.1626	38.0735	41.0973	38.4055	32.6295	26.5123	21.6951	18.4848	16.4109	15.0198	14.0289	13.28	12.6873	12.0213	16.7129	28.7213	31.2133	30.1412	42.804	53.4419
ISys 5 (ng/mL)	79	8	0	5.50064	10.3561	10.1865	10.1021	17.1846	22.8024	25.5752	30.7039	33.7128	31.9356	27.5358	22.7452	18.9268	16.3732	14.7342	13.6451	12.8746	12.2938	11.8344	11.3303	20.8126	34.8928	36.3944	35.5871	47.8725	57.2277	63.4635	68.2195	72.1548	75.5683	78.6069	75.1671	63.6471	54.1222	47.592	43.1829	40.0944	37.8146	36.0455	34.3602	45.0383	68.5668	73.1956	71.4734	82.348	87.1317
ISys 5 (ng/mL)	74	8	0	3.48261	7.04589	7.55526	8.098	13.954	19.9105	24.0958	27.86	31.0394	33.6287	32.4976	29.072	25.5694	22.7309	20.5772	18.954	17.7159	16.7553	15.9977	15.3068	17.732	26.7956	31.6205	34.0289	40.858	44.7925	47.486	49.6526	51.5664	53.3388	55.0187	56.6278	58.1772	59.6733	61.1195	62.5167	63.8424	62.0329	57.7515	53.5897	53.8497	66.1387	73.9581	77.4522	83.1899	84.1643
ISys 5 (ng/mL)	119	8	0	0.258336	1.26328	2.26519	3.14991	4.9107	7.28308	9.57502	13.0712	16.2852	17.2394	16.6414	15.3124	13.845	12.5298	11.4262	10.514	9.75981	9.13282	8.60842	8.13753	8.17878	10.0754	11.9344	13.3111	16.8135	22.5065	27.9157	33.686	39.4494	42.0303	40.9989	38.121	34.8285	31.8165	29.2383	27.0619	25.2227	23.6597	22.3237	21.1132	20.5049	22.8728	25.6339	27.9649	33.8514	43.3787
ISys 5 (ng/mL)	54	8	0	1.06744	4.04993	6.57559	8.44203	12.2655	15.9776	18.5142	21.6985	24.4217	25.2789	24.6671	23.2877	21.7629	20.4128	19.2901	18.3604	17.5811	16.9179	16.3453	15.8129	16.7426	20.3558	23.3805	25.413	29.7356	34.1824	37.1423	40.5955	43.5515	44.5013	43.8484	42.3009	40.5086	38.831	37.3534	36.0591	34.9154	33.8932	32.9699	32.0941	31.9105	34.255	36.7226	38.7121	42.9215	47.2399
ISys 5 (ng/mL)	96	8	0	2.20757	8.76362	12.6834	14.7482	26.6924	36.3338	39.4171	45.3708	49.1755	47.0387	41.6323	35.6227	30.723	27.361	25.1377	23.6072	22.4825	21.602	20.8788	20.1141	25.532	38.8013	45.8952	49.5514	65.8321	85.7593	94.8293	104.64	111.198	108.828	100.994	91.3897	82.7501	76.1245	71.2413	67.5565	64.6565	62.2778	60.2619	58.2881	62.0237	77.8358	87.2586	91.9288	113.084	135.452
ISys 5 (ng/mL)	55	8	0	2.00403	5.0495	5.93287	6.38876	10.4377	14.8261	17.9373	21.871	25.1367	26.0174	25.0376	23.1073	21.031	19.2198	17.7381	16.5376	15.5594	14.7545	14.0862	13.4794	15.4974	22.7236	26.3338	27.3119	32.3171	41.6068	47.5696	54.2268	59.9067	61.6063	60.0668	56.7256	52.9407	49.4596	46.4533	43.8832	41.6778	39.7721	38.1139	36.5899	39.4198	48.0065	51.4784	52.0593	59.503	69.713
ISys 5 (ng/mL)	10	8	0	2.5873	9.9729	13.6329	14.9756	20.0539	27.5441	33.2494	39.3094	44.6098	47.0251	47.1579	45.9899	44.4072	42.8935	41.5669	40.4126	39.396	38.4872	37.6647	36.8733	39.9705	48.7016	52.0918	52.8527	58.302	66.5165	72.7565	79.9238	86.8414	90.6433	91.6026	90.6834	88.963	87.1207	85.371	83.7368	82.204	80.7568	79.3846	78.019	82.0881	92.0786	95.0333	95.1511	101.607	111.531
ISys 5 (ng/mL)	41	8	0	5.03177	9.77144	10.0822	10.1508	16.1582	22.2901	26.342	31.8856	36.267	37.0075	35.1991	32.3012	29.459	27.1676	25.4144	24.0626	22.9938	22.1251	21.4014	20.7154	26.2928	37.4422	40.5658	41.0202	49.172	58.3006	64.2474	71.6044	77.7509	79.3175	77.4456	73.822	69.9103	66.4602	63.5821	61.1763	59.1304	57.3573	55.7952	54.3107	58.3484	69.3024	73.0215	73.5914	82.0519	92.2196
ISys 5 (ng/mL)	73	8	0	1.87177	7.90253	11.8408	13.816	19.5208	26.3108	31.6866	37.587	42.3396	44.0309	43.4829	41.7817	39.8301	38.0876	36.641	35.4472	34.4485	33.5978	32.8604	32.1748	33.4783	40.3579	44.5515	46.3197	51.8386	59.4968	65.7123	72.6265	79.0913	82.4236	82.9572	81.7254	79.8399	77.9744	76.3214	74.8764	73.5987	72.4508	71.4052	70.3842	73.017	81.7336	85.7446	86.9948	93.3363	103.339
ISys 5 (ng/mL)	101	8	0	3.74762	11.6219	12.0415	11.0293	17.4818	23.3418	26.2802	31.0764	34.3093	33.196	29.5826	25.3896	21.8694	19.3761	17.6804	16.4949	15.6238	14.9504	14.4077	13.8649	21.7409	37.4549	37.6339	34.5476	39.9256	43.6973	46.2104	48.1269	49.6917	51.02	52.1819	53.2212	54.1644	54.8743	51.4183	46.45	42.4301	39.4447	37.216	35.371	47.764	63.3081	61.0961	56.5395	58.6088	59.4885
ISys 5 (ng/mL)	76	8	0	3.72695	8.41569	9.11018	9.48647	15.7171	22.1846	26.7791	33.0187	38.1294	39.4072	37.7881	34.7898	31.6909	29.0855	26.9993	25.3121	23.9149	22.731	21.7102	20.7263	24.643	37.1377	42.4126	43.9481	56.3458	70.904	81.0737	94.4243	106.019	109.686	107.036	101.052	94.4226	88.5067	83.4856	79.1918	75.4502	72.1318	69.1501	66.2773	68.5535	85.0665	94.9828	97.9463	112.971	136.124
ISys 5 (ng/mL)	36	8	0	0.497998	2.62449	4.73021	6.39917	10.8982	16.0035	19.2836	22.9612	26.0359	26.8798	25.9577	24.0934	22.0409	20.2049	18.6694	17.4027	16.357	15.4897	14.7672	14.1262	14.2645	17.5208	20.9703	23.3238	28.2609	36.0484	42.4418	49.6448	56.1552	58.3638	57.3453	54.5799	51.2956	48.1724	45.4044	42.9917	40.8931	39.0643	37.4666	36.0183	36.1924	40.6022	43.7062	45.6331	52.2105	61.1847
ISys 5 (ng/mL)	86	8	0	1.99587	8.69497	13.8994	17.9896	28.7882	39.4281	46.6511	54.4507	60.8156	63.4658	63.5483	62.3973	60.9828	59.7546	58.7942	58.0595	57.4932	57.0485	56.6912	56.368	56.7052	59.8277	63.2941	65.9839	71.1268	77.9818	82.6345	87.272	91.5291	94.1886	95.5056	95.9783	96.1208	96.2466	96.4389	96.6873	96.9674	97.2599	97.5529	97.8036	98.5171	101.609	104.987	107.788	111.884	119.445
ISys 5 (ng/mL)	56	9	0	1.70051	6.55374	8.72534	9.30258	15.2549	22.0872	25.9131	30.8691	34.864	35.2487	33.0982	29.8583	26.6904	24.118	22.154	20.6668	19.533	18.6598	17.981	17.0048	19.2147	28.8664	33.7541	35.3769	43.1105	51.8827	57.0711	62.7084	67.3276	68.2206	66.3436	63.0473	59.4856	56.2767	53.5602	51.2907	49.3931	47.7986	46.3862	44.4828	45.4882	52.696	56.6667	58.0178	64.3876	72.3598
ISys 5 (ng/mL)	94	9	0	0.724195	3.28786	5.34485	7.02977	11.7894	15.9374	18.3113	21.6126	24.0006	23.7472	21.6895	18.9612	16.4314	14.4516	12.9793	11.8819	11.0478	10.3982	9.88072	9.40022	10.9579	16.8364	20.8653	23.4441	32.5895	40.8345	45.5173	52.1532	57.1648	56.7857	52.5846	46.8334	41.3509	36.916	33.4913	30.8368	28.7411	27.0511	25.6616	24.3814	25.3926	33.2531	39.4204	43.0944	55.6355	69.848
ISys 5 (ng/mL)	52	9	0	1.92666	5.54975	6.29261	6.45018	10.1502	12.7414	13.8014	16.1564	17.2728	15.8614	13.1576	10.3821	8.23757	6.84022	5.97162	5.41994	5.05167	4.7918	4.58716	3.83896	7.23211	15.214	16.997	16.8169	24.4825	29.9388	32.1063	36.9997	39.5521	36.7747	31.1198	25.1341	20.3731	17.1574	15.0718	13.6857	12.7196	12.0114	11.4611	10.1849	16.8131	28.6231	29.932	28.9187	39.7252	48.3524
ISys 5 (ng/mL)	48	9	0	0.933648	4.6921	8.16321	10.7038	16.3955	22.1112	26.8952	31.1114	34.8948	38.3022	40.2772	40.0563	39.1361	38.158	37.284	36.5268	35.8698	35.2945	34.7861	34.301	34.6685	38.4233	42.1244	44.5757	49.3384	55.2302	60.034	62.6881	64.3481	65.8361	67.2948	68.7495	70.2031	71.653	73.0952	74.5232	75.3854	75.1322	74.5746	73.9374	74.144	78.0601	81.8917	84.6285	89.4741	93.8325
ISys 5 (ng/mL)	80	9	0	4.57053	12.2006	15.8405	16.8441	23.2969	31.0762	36.9782	44.1323	50.5217	53.3648	53.3728	51.796	49.7508	47.8418	46.2228	44.8769	43.756	42.8147	42.0172	41.293	42.5039	49.7875	56.1694	59.6601	66.6921	75.0692	81.5981	89.1189	96.4828	100.897	102.531	102.276	101.165	99.8766	98.6464	97.5144	96.4736	95.511	94.6164	93.7258	94.5347	101.54	108.16	112.032	120.267	130.526
ISys 5 (ng/mL)	26	9	0	3.22654	8.63904	10.0435	10.3566	16.1914	24.5555	29.9936	36.5833	42.2053	44.0127	42.9474	40.464	37.8112	35.5943	33.873	32.5442	31.5042	30.6747	30.0011	29.3864	33.7415	44.0746	48.5191	49.5954	55.7642	65.4519	72.1165	78.6568	84.265	86.6428	86.47	84.819	82.6953	80.6843	78.9445	77.4593	76.1805	75.0642	74.0767	73.1417	75.4611	83.2637	86.6899	87.42	92.4856	101.274
ISys 5 (ng/mL)	63	9	0	1.46738	4.4172	6.35888	7.36677	10.1752	15.2666	19.2676	23.2412	26.6135	28.0404	27.8946	26.8454	25.5166	24.258	23.1635	22.2263	21.4203	20.7204	20.1067	19.5385	20.8389	24.5682	27.3399	28.8002	32.2754	38.8125	44.2257	48.6468	52.5704	56.1195	57.5382	56.5586	54.7594	52.8818	51.1455	49.577	48.1597	46.8714	45.6936	44.5709	45.3685	49.669	52.6744	54.2301	58.3017	65.6914
ISys 5 (ng/mL)	69	9	0	1.76914	7.61946	11.2709	13.3885	22.039	30.938	37.0265	44.6017	50.7044	52.4446	51.166	48.5077	45.7273	43.3946	41.5531	40.0942	38.9117	37.9273	37.0876	36.296	38.2884	47.4567	53.1125	55.4667	63.9858	73.8653	80.6823	87.213	93.1455	98.4536	99.8215	98.1018	95.5155	93.0615	90.9626	89.1765	87.6257	86.2475	84.9993	83.7662	85.3737	95.0371	101.06	103.439	112.129	125.981
ISys 5 (ng/mL)	83	9	0	0.481085	2.64265	4.62851	5.88061	8.52789	11.676	14.258	17.2504	20.1353	21.8743	22.5542	22.5308	22.193	21.7843	21.3882	21.0205	20.6808	20.3659	20.0728	19.7819	20.13	23.1813	26.0339	27.6276	30.9978	35.2379	38.7454	42.8083	46.8784	49.4806	50.6303	50.7548	50.377	49.8456	49.2896	48.7385	48.1969	47.6642	47.1399	46.598	47.1977	51.0614	53.8399	55.1386	58.8498	63.9735
ISys 5 (ng/mL)	7	9	0	4.62972	10.2726	8.51946	7.56986	14.9336	22.505	23.9074	27.2651	26.4409	21.514	16.0908	12.0466	9.76192	8.70471	8.15649	7.79263	7.50988	7.27715	7.08391	6.71688	17.6824	30.2327	25.6922	22.0119	35.6385	47.3636	43.8407	42.3097	42.3987	42.9453	43.5638	42.8772	31.5262	24.2489	21.119	19.5974	18.6381	17.9118	17.3194	16.4562	35.8549	50.2826	42.119	36.1558	56.4111	61.2186
ISys 5 (ng/mL)	72	9	0	0.812141	3.79335	5.93637	6.99162	9.24302	15.0014	22.3188	28.4848	32.0394	31.926	29.5432	26.2956	23.2145	20.7332	18.8368	17.3876	16.2603	15.3634	14.6343	13.9788	14.8244	20.4459	25.0109	27.5439	32.7486	38.5098	44.0599	56.8463	68.8035	71.0042	67.5117	61.8174	56.0536	51.1328	47.1426	43.9119	41.2605	39.0478	37.1721	35.4807	35.437	41.7999	47.0137	49.5439	51.6976	57.5392
ISys 5 (ng/mL)	59	9	0	3.67907	7.13196	7.50626	7.00173	11.1367	13.5309	14.3433	16.8977	17.6493	15.6159	12.4897	9.01745	6.02405	4.29747	3.35241	2.79908	2.43572	2.16874	1.95559	1.77639	9.09049	16.5938	17.5287	16.3351	22.2019	25.5765	27.4279	28.6574	29.5821	30.3294	30.8933	24.542	16.2133	11.1764	8.43567	6.88032	5.90214	5.21239	4.67862	4.23923	9.90906	22.4036	27.2298	27.8657	30.078	30.7629
ISys 5 (ng/mL)	98	9	0	1.79487	7.09707	9.3572	10.1057	14.001	18.4574	21.712	25.6832	29.1345	30.4207	29.9579	28.5154	26.8054	25.2185	23.8461	22.6745	21.6729	20.8128	20.0709	19.3902	21.0431	28.2532	31.8258	32.674	36.9779	43.992	48.7786	54.4634	59.6175	61.7185	61.1949	59.0861	56.4476	53.8995	51.6128	49.5881	47.794	46.1986	44.7747	43.4385	48.6853	57.8076	58.9833	58.1791	63.8976	71.7739
ISys 5 (ng/mL)	108	10	0	1.01856	3.98163	6.26875	7.85993	11.7648	15.2274	17.3198	20.3134	22.6174	22.621	20.9464	18.5491	16.2137	14.2998	12.8184	11.6814	10.8022	10.1141	9.56887	9.08187	11.9091	18.0879	22.0954	23.6799	30.0049	36.5468	40.6893	46.3302	50.8792	51.2664	48.4933	44.1946	39.789	35.9856	32.8781	30.3601	28.3087	26.622	25.2223	23.9681	25.9536	33.1633	38.5223	41.2	49.6431	58.3765
ISys 5 (ng/mL)	106	10	0	1.45496	5.58828	8.61414	11.4418	22.0681	31.6847	37.2807	45.3774	51.2836	50.999	46.8169	41.3778	36.4948	32.7975	30.1191	28.1426	26.6236	25.4048	24.392	23.4109	30.0649	44.1693	50.9761	53.3292	72.1941	90.5983	101.405	117.31	129.599	129.759	121.841	110.908	100.67	92.5445	86.3417	81.5184	77.6344	74.396	71.6205	68.9738	72.5042	92.3009	105.117	110.839	137.237	162.844
ISys 5 (ng/mL)	112	10	0	1.90754	6.08141	8.02907	9.41132	15.0659	21.8347	27.0376	33.2477	38.9458	41.5562	41.505	39.8601	37.6771	35.5707	33.7244	32.1458	30.8015	29.6547	28.6734	27.7714	31.2974	40.118	43.7832	45.6922	55.1021	66.7096	75.549	86.2726	96.3346	100.97	100.809	97.6999	93.5338	89.4278	85.7247	82.4534	79.571	77.026	74.7726	72.6178	75.4828	86.6154	91.939	94.109	105.47	119.875
ISys 5 (ng/mL)	75	10	0	3.60173	8.8954	10.5281	11.0897	15.7859	23.6959	29.0101	35.0907	40.2031	41.9602	41.153	39.0361	36.703	34.6988	33.0938	31.8138	30.7788	29.927	29.2143	28.5496	33.6957	43.2643	46.8435	47.7642	52.2422	63.6274	71.3261	78.4719	84.4718	87.1808	87.3034	85.899	83.9705	82.1097	80.4773	79.0612	77.819	76.7127	75.7136	74.7396	76.0138	83.3477	87.8383	89.4941	92.7395	101.09
ISys 5 (ng/mL)	5	10	0	1.25987	4.42838	5.62952	5.87915	8.7206	12.0144	13.7869	16.1123	17.6151	17.0869	15.2506	13	10.9824	9.43866	8.31656	7.50236	6.9021	6.44989	6.10188	5.78277	9.80557	16.4562	17.108	16.4206	22.17	28.1774	31.4025	36.1039	39.3612	38.471	34.8134	30.1888	25.9539	22.6379	20.1598	18.3048	16.8921	15.7934	14.9215	14.086	16.6758	26.2952	29.5062	29.2804	37.0634	46.4123
ISys 5 (ng/mL)	81	10	0	0.285432	1.48232	3.02985	4.72934	7.36328	10.8988	15.8603	25.2486	30.9951	31.0118	28.0578	24.2266	20.7309	18.0013	15.9714	14.4607	13.3147	12.4236	11.7137	11.0738	11.0297	12.998	15.6635	19.1089	28.4011	40.1756	50.9799	59.9219	65.1819	64.4558	59.6961	53.2779	47.1115	42.0596	38.1196	35.0425	32.596	30.6084	28.961	27.4598	26.4468	28.1262	31.1646	35.5093	47.6504	65.4298
ISys 5 (ng/mL)	30	10	0	3.52599	12.58	16.5745	17.7034	26.3478	42.5615	49.4441	57.7044	62.5097	59.6526	52.7652	45.3349	39.4435	35.4857	32.8705	31.0297	29.6265	28.4856	27.5193	26.4764	33.9763	56.8476	65.6965	68.6786	93.3521	113.964	124.174	142.271	155.127	152.278	140.106	125.503	113.038	104.005	97.5902	92.8073	89.0137	85.8456	83.1049	80.3235	85.9806	114.088	130.619	136.853	171.758	202.151
ISys 5 (ng/mL)	87	10	0	0.809923	2.84837	4.53045	6.16142	10.3481	14.7224	17.6817	21.2012	24.2185	25.0609	24.164	22.3399	20.3382	18.2783	16.0689	14.1186	12.4918	11.1484	10.0343	9.10213	8.99131	11.6011	15.2346	18.5068	22.5566	30.5102	39.8926	50.3376	57.1743	58.7093	56.7154	52.9364	48.7883	45.0257	41.8173	39.0917	36.3541	33.4687	30.546	27.9159	26.5342	29.2602	33.8461	38.672	49.4437	62.9875
ISys 5 (ng/mL)	88	10	0	0.390933	2.09729	4.26207	6.68658	11.6866	20.3624	26.6865	32.4975	37.3954	39.7878	40.0681	39.0496	37.5411	36.0298	34.6741	33.492	32.4666	31.5752	30.7975	30.0715	29.5238	30.9581	33.5058	36.7444	42.525	53.5067	63.7171	72.2739	79.1308	82.8475	83.9791	83.4215	82.0836	80.5576	79.0726	77.6838	76.3965	75.204	74.0979	73.0243	72.0897	73.1964	75.4136	78.5043	86.3699	96.0853
ISys 5 (ng/mL)	4	10	0	0.816357	3.85762	6.60017	8.66014	12.5037	18.4221	26.2399	34.6936	40.3298	42.134	41.4232	39.4721	37.2657	35.3015	33.6769	32.3483	31.254	30.3415	29.571	28.8752	29.0773	32.6241	36.3402	39.1138	43.6443	51.3162	60.6352	69.0393	75.4752	78.3694	78.4745	76.9011	74.7304	72.6122	70.7402	69.1147	67.6969	66.4478	65.336	64.2853	64.788	69.0999	72.7589	75.3707	81.6402	92.8895
ISys 5 (ng/mL)	20	10	0	1.02583	3.48459	5.54018	7.05719	10.2855	14.2068	17.4614	21.2023	24.8089	27.02	27.9556	28.0514	27.7621	27.369	26.9768	26.611	26.2752	25.9672	25.6103	25.0507	25.5612	28.2103	30.5057	32.0117	34.7573	38.1129	40.7811	43.6305	46.3502	48.0553	48.8329	48.9826	48.8221	48.5555	48.2641	47.9702	47.6793	47.3923	47.0496	46.512	46.4924	48.0243	49.5331	50.6109	52.6946	55.4298
ISys 5 (ng/mL)	13	10	0	4.08177	9.15624	10.2832	10.4402	15.2279	21.3819	25.0884	29.533	33.1162	33.7894	32.3781	30.0189	27.6306	25.639	24.0731	22.8431	21.8601	21.0574	20.3882	19.7754	25.0184	32.3698	34.0253	33.8827	39.3545	46.859	51.6087	56.4779	60.8035	62.8786	61.7266	59.0011	55.9688	53.2625	50.9991	49.113	47.5197	46.1502	44.9542	43.8342	48.8529	56.6334	58.2587	57.8049	62.8033	68.0044
ISys 5 (ng/mL)	21	10	0	3.77001	9.05814	11.1805	12.4495	18.0313	24.5776	29.4694	35.3439	40.7052	43.1714	43.247	41.9347	40.1715	38.4845	37.0201	35.7724	34.7043	33.7792	32.9682	32.2055	33.6362	41.4988	47.0948	50.1524	58.4823	68.892	76.1659	84.0683	91.2471	94.8427	95.4471	94.1878	92.1814	90.1116	88.2002	86.4702	84.8997	83.4624	82.1375	80.8451	81.3135	88.7472	94.8362	98.0712	106.663	117.679
Observed Data
Time (h)			0.54	0.96	2.04	3.06	4.08	6	7.98	12	24	36	47.94
Subject 1 : DV 1			138.745	181.704	186.764	217.426	223.484	153.756	121.481	65.1253	23.4995	8.07859	3.37092
[truncated: 153 more columns]

## Sheet: Conc Profiles CSys(CPlasma)
Summary Statistics			Mean
	From (h)	To (h)	TMax (h)	CMax (ng/mL)	AUC (ng/mL.h)
Rivaroxaban Denise Chua	168	240	3.60072	271.512	2838.92
Rivaroxaban Denise Chua + Interaction	168	240	3.60072	306.73	3721.58
Verapamil Denise Chua	0	24	9.6	35.0583	454.431
SV-Norverapamil	0	24	12	30.7881	468.64
Population Statistics
Time - Substrate (h)			0	1.2	2.4	3.6	4.8	6	7.2	8.4	9.6	10.8	12	13.2	14.4	15.6	16.8	18	19.2	20.4	21.6	22.8	24	25.2	26.4	27.6	28.8	30	31.2	32.4	33.6	34.8	36	37.2	38.4	39.6	40.8	42	43.2	44.4	45.6	46.8	48	49.2	50.4	51.6	52.8	54	55.2
CSys Mean (ng/mL) - Rivaroxaban Denise Chua			0	0	0	0	0	0	0	0	0	0	0	0	0	0	0	0	0	0	0	0	0	0	0	0	0	0	0	0	0	0	0	0	0	0	0	0	0	0	0	0	0	0	0	0	0	0	0
CSys 95th percentile			0	0	0	0	0	0	0	0	0	0	0	0	0	0	0	0	0	0	0	0	0	0	0	0	0	0	0	0	0	0	0	0	0	0	0	0	0	0	0	0	0	0	0	0	0	0	0
CSys 5th percentile			0	0	0	0	0	0	0	0	0	0	0	0	0	0	0	0	0	0	0	0	0	0	0	0	0	0	0	0	0	0	0	0	0	0	0	0	0	0	0	0	0	0	0	0	0	0	0
CSys Mean - Rivaroxaban Denise Chua + interaction (ng/mL)			0	0	0	0	0	0	0	0	0	0	0	0	0	0	0	0	0	0	0	0	0	0	0	0	0	0	0	0	0	0	0	0	0	0	0	0	0	0	0	0	0	0	0	0	0	0	0
CSys + Interaction 95th percentile			0	0	0	0	0	0	0	0	0	0	0	0	0	0	0	0	0	0	0	0	0	0	0	0	0	0	0	0	0	0	0	0	0	0	0	0	0	0	0	0	0	0	0	0	0	0	0
CSys + Interaction 5th percentile			0	0	0	0	0	0	0	0	0	0	0	0	0	0	0	0	0	0	0	0	0	0	0	0	0	0	0	0	0	0	0	0	0	0	0	0	0	0	0	0	0	0	0	0	0	0	0
Time - Inhibitor (h)			0	1.2	2.4	3.6	4.8	6	7.2	8.4	9.6	10.8	12	13.2	14.4	15.6	16.8	18	19.2	20.4	21.6	22.8	24	25.2	26.4	27.6	28.8	30	31.2	32.4	33.6	34.8	36	37.2	38.4	39.6	40.8	42	43.2	44.4	45.6	46.8	48	49.2	50.4	51.6	52.8	54	55.2
ISys 1 Mean - Verapamil Denise Chua (ng/mL)			0	7.473	9.43918	8.64519	11.8543	21.8048	24.2207	27.9841	35.0583	34.6399	31.0241	26.0861	22.1208	19.5633	17.916	16.6782	15.6995	14.8675	14.145	13.3931	12.1587	39.2114	46.672	42.9924	50.8917	81.9678	90.8175	101.013	120.416	118.763	107.235	92.0432	79.3967	70.7166	64.7864	60.1444	56.3008	52.9027	49.8284	46.8694	43.109	91.6052	103.964	95.6519	107.87	158.844	171.542
ISys 1 95th percentile			0	16.1417	19.6797	17.0642	21.6344	40.9815	48.4177	54.9919	70.0831	71.7266	66.3539	57.7901	50.5142	45.1225	41.6811	39.1177	37.0844	35.4341	34.6958	34.0159	30.9537	87.1601	106.139	91.3786	102.875	165.793	193.458	215.703	252.846	250.635	236.758	204.252	176.144	158.72	151.951	144.703	136.337	128.968	121.778	115.169	107.568	206.038	217.717	199.413	216.743	322.527	346.94
ISys 1 5th percentile			0	2.24013	3.9186	3.35044	4.95361	8.0713	8.05617	8.81602	10.1846	9.73672	8.98706	8.06677	6.83127	5.45716	5.11636	4.50492	3.97323	3.80067	3.50275	2.91858	2.23062	10.6549	14.7152	13.2715	16.8356	20.4744	20.8279	22.8218	24.3958	23.1509	21.3616	18.4383	15.8101	13.1787	11.7917	11.4698	10.8216	10.3459	9.59965	8.31781	7.20855	21.3562	30.5305	26.1879	30.8207	45.5135	44.894
ISys 5 Mean - SV-Norverapamil (ng/mL)			0	1.94564	5.92213	7.93361	9.13413	14.0222	19.2009	22.6213	26.8778	30.153	30.7881	29.5951	27.6152	25.661	24.0744	22.8263	21.8205	20.9877	20.2665	19.6155	18.9447	21.7627	28.8645	32.0792	33.4776	40.17	47.4199	52.219	58.0085	62.6603	63.7804	62.2956	59.4539	56.3483	53.7157	51.5699	49.7834	48.2507	46.8663	45.5578	44.2304	46.9723	55.5508	59.4083	60.9012	69.0006	77.7857
ISys 5 95th percentile			0	4.20395	10.3207	14.0463	15.258	24.1597	32.512	37.6368	44.6148	50.1277	50.8137	50.2379	47.267	44.1758	42.4335	41.4439	40.2694	39.1781	38.2353	37.405	36.6777	38.8522	49.1909	53.0924	55.0923	65.0012	74.5274	81.3622	89.5686	97.8094	102.517	103.03	100.047	95.8484	92.8289	90.3436	89.3992	88.3891	86.0666	84.1468	82.4517	85.7075	98.7759	104.43	106.589	113.881	130.898
ISys 5 5th percentile			0	0.391623	2.09736	3.83878	5.06109	8.04648	10.5558	12.2508	12.5397	12.6404	12.3266	12.1572	10.198	8.31856	7.49811	6.87667	6.43001	6.09907	5.84626	5.25444	4.69129	8.36721	13.5727	15.7028	16.3992	22.1843	26.1045	28.0138	28.0099	27.3959	25.5475	22.3768	21.5493	19.4649	17.4353	16.3496	15.2186	14.3642	13.6898	12.8936	12.1012	16.6925	25.0446	28.2542	29.3045	36.2351	42.6909
Individual Statistics
Type	Individual	Trial
Time - Substrate (h)			0	1.2	2.4	3.6	4.8	6	7.2	8.4	9.6	10.8	12	13.2	14.4	15.6	16.8	18	19.2	20.4	21.6	22.8	24	25.2	26.4	27.6	28.8	30	31.2	32.4	33.6	34.8	36	37.2	38.4	39.6	40.8	42	43.2	44.4	45.6	46.8	48	49.2	50.4	51.6	52.8	54	55.2
CSys (ng/mL)	1	1	0	0	0	0	0	0	0	0	0	0	0	0	0	0	0	0	0	0	0	0	0	0	0	0	0	0	0	0	0	0	0	0	0	0	0	0	0	0	0	0	0	0	0	0	0	0	0
CSys (ng/mL)	2	2	0	0	0	0	0	0	0	0	0	0	0	0	0	0	0	0	0	0	0	0	0	0	0	0	0	0	0	0	0	0	0	0	0	0	0	0	0	0	0	0	0	0	0	0	0	0	0
CSys (ng/mL)	3	2	0	0	0	0	0	0	0	0	0	0	0	0	0	0	0	0	0	0	0	0	0	0	0	0	0	0	0	0	0	0	0	0	0	0	0	0	0	0	0	0	0	0	0	0	0	0	0
CSys (ng/mL)	4	10	0	0	0	0	0	0	0	0	0	0	0	0	0	0	0	0	0	0	0	0	0	0	0	0	0	0	0	0	0	0	0	0	0	0	0	0	0	0	0	0	0	0	0	0	0	0	0
CSys (ng/mL)	5	10	0	0	0	0	0	0	0	0	0	0	0	0	0	0	0	0	0	0	0	0	0	0	0	0	0	0	0	0	0	0	0	0	0	0	0	0	0	0	0	0	0	0	0	0	0	0	0
CSys (ng/mL)	6	2	0	0	0	0	0	0	0	0	0	0	0	0	0	0	0	0	0	0	0	0	0	0	0	0	0	0	0	0	0	0	0	0	0	0	0	0	0	0	0	0	0	0	0	0	0	0	0
CSys (ng/mL)	7	9	0	0	0	0	0	0	0	0	0	0	0	0	0	0	0	0	0	0	0	0	0	0	0	0	0	0	0	0	0	0	0	0	0	0	0	0	0	0	0	0	0	0	0	0	0	0	0
CSys (ng/mL)	8	1	0	0	0	0	0	0	0	0	0	0	0	0	0	0	0	0	0	0	0	0	0	0	0	0	0	0	0	0	0	0	0	0	0	0	0	0	0	0	0	0	0	0	0	0	0	0	0
CSys (ng/mL)	9	7	0	0	0	0	0	0	0	0	0	0	0	0	0	0	0	0	0	0	0	0	0	0	0	0	0	0	0	0	0	0	0	0	0	0	0	0	0	0	0	0	0	0	0	0	0	0	0
CSys (ng/mL)	10	8	0	0	0	0	0	0	0	0	0	0	0	0	0	0	0	0	0	0	0	0	0	0	0	0	0	0	0	0	0	0	0	0	0	0	0	0	0	0	0	0	0	0	0	0	0	0	0
CSys (ng/mL)	11	5	0	0	0	0	0	0	0	0	0	0	0	0	0	0	0	0	0	0	0	0	0	0	0	0	0	0	0	0	0	0	0	0	0	0	0	0	0	0	0	0	0	0	0	0	0	0	0
CSys (ng/mL)	12	1	0	0	0	0	0	0	0	0	0	0	0	0	0	0	0	0	0	0	0	0	0	0	0	0	0	0	0	0	0	0	0	0	0	0	0	0	0	0	0	0	0	0	0	0	0	0	0
CSys (ng/mL)	13	10	0	0	0	0	0	0	0	0	0	0	0	0	0	0	0	0	0	0	0	0	0	0	0	0	0	0	0	0	0	0	0	0	0	0	0	0	0	0	0	0	0	0	0	0	0	0	0
CSys (ng/mL)	14	4	0	0	0	0	0	0	0	0	0	0	0	0	0	0	0	0	0	0	0	0	0	0	0	0	0	0	0	0	0	0	0	0	0	0	0	0	0	0	0	0	0	0	0	0	0	0	0
CSys (ng/mL)	15	3	0	0	0	0	0	0	0	0	0	0	0	0	0	0	0	0	0	0	0	0	0	0	0	0	0	0	0	0	0	0	0	0	0	0	0	0	0	0	0	0	0	0	0	0	0	0	0
CSys (ng/mL)	16	5	0	0	0	0	0	0	0	0	0	0	0	0	0	0	0	0	0	0	0	0	0	0	0	0	0	0	0	0	0	0	0	0	0	0	0	0	0	0	0	0	0	0	0	0	0	0	0
CSys (ng/mL)	17	3	0	0	0	0	0	0	0	0	0	0	0	0	0	0	0	0	0	0	0	0	0	0	0	0	0	0	0	0	0	0	0	0	0	0	0	0	0	0	0	0	0	0	0	0	0	0	0
CSys (ng/mL)	18	2	0	0	0	0	0	0	0	0	0	0	0	0	0	0	0	0	0	0	0	0	0	0	0	0	0	0	0	0	0	0	0	0	0	0	0	0	0	0	0	0	0	0	0	0	0	0	0
CSys (ng/mL)	19	6	0	0	0	0	0	0	0	0	0	0	0	0	0	0	0	0	0	0	0	0	0	0	0	0	0	0	0	0	0	0	0	0	0	0	0	0	0	0	0	0	0	0	0	0	0	0	0
CSys (ng/mL)	20	10	0	0	0	0	0	0	0	0	0	0	0	0	0	0	0	0	0	0	0	0	0	0	0	0	0	0	0	0	0	0	0	0	0	0	0	0	0	0	0	0	0	0	0	0	0	0	0
CSys (ng/mL)	21	10	0	0	0	0	0	0	0	0	0	0	0	0	0	0	0	0	0	0	0	0	0	0	0	0	0	0	0	0	0	0	0	0	0	0	0	0	0	0	0	0	0	0	0	0	0	0	0
CSys (ng/mL)	22	2	0	0	0	0	0	0	0	0	0	0	0	0	0	0	0	0	0	0	0	0	0	0	0	0	0	0	0	0	0	0	0	0	0	0	0	0	0	0	0	0	0	0	0	0	0	0	0
CSys (ng/mL)	23	3	0	0	0	0	0	0	0	0	0	0	0	0	0	0	0	0	0	0	0	0	0	0	0	0	0	0	0	0	0	0	0	0	0	0	0	0	0	0	0	0	0	0	0	0	0	0	0
CSys (ng/mL)	24	2	0	0	0	0	0	0	0	0	0	0	0	0	0	0	0	0	0	0	0	0	0	0	0	0	0	0	0	0	0	0	0	0	0	0	0	0	0	0	0	0	0	0	0	0	0	0	0
CSys (ng/mL)	25	1	0	0	0	0	0	0	0	0	0	0	0	0	0	0	0	0	0	0	0	0	0	0	0	0	0	0	0	0	0	0	0	0	0	0	0	0	0	0	0	0	0	0	0	0	0	0	0
CSys (ng/mL)	26	9	0	0	0	0	0	0	0	0	0	0	0	0	0	0	0	0	0	0	0	0	0	0	0	0	0	0	0	0	0	0	0	0	0	0	0	0	0	0	0	0	0	0	0	0	0	0	0
CSys (ng/mL)	27	6	0	0	0	0	0	0	0	0	0	0	0	0	0	0	0	0	0	0	0	0	0	0	0	0	0	0	0	0	0	0	0	0	0	0	0	0	0	0	0	0	0	0	0	0	0	0	0
CSys (ng/mL)	28	6	0	0	0	0	0	0	0	0	0	0	0	0	0	0	0	0	0	0	0	0	0	0	0	0	0	0	0	0	0	0	0	0	0	0	0	0	0	0	0	0	0	0	0	0	0	0	0
CSys (ng/mL)	29	5	0	0	0	0	0	0	0	0	0	0	0	0	0	0	0	0	0	0	0	0	0	0	0	0	0	0	0	0	0	0	0	0	0	0	0	0	0	0	0	0	0	0	0	0	0	0	0
CSys (ng/mL)	30	10	0	0	0	0	0	0	0	0	0	0	0	0	0	0	0	0	0	0	0	0	0	0	0	0	0	0	0	0	0	0	0	0	0	0	0	0	0	0	0	0	0	0	0	0	0	0	0
CSys (ng/mL)	31	5	0	0	0	0	0	0	0	0	0	0	0	0	0	0	0	0	0	0	0	0	0	0	0	0	0	0	0	0	0	0	0	0	0	0	0	0	0	0	0	0	0	0	0	0	0	0	0
CSys (ng/mL)	32	5	0	0	0	0	0	0	0	0	0	0	0	0	0	0	0	0	0	0	0	0	0	0	0	0	0	0	0	0	0	0	0	0	0	0	0	0	0	0	0	0	0	0	0	0	0	0	0
CSys (ng/mL)	33	2	0	0	0	0	0	0	0	0	0	0	0	0	0	0	0	0	0	0	0	0	0	0	0	0	0	0	0	0	0	0	0	0	0	0	0	0	0	0	0	0	0	0	0	0	0	0	0
CSys (ng/mL)	34	7	0	0	0	0	0	0	0	0	0	0	0	0	0	0	0	0	0	0	0	0	0	0	0	0	0	0	0	0	0	0	0	0	0	0	0	0	0	0	0	0	0	0	0	0	0	0	0
CSys (ng/mL)	35	6	0	0	0	0	0	0	0	0	0	0	0	0	0	0	0	0	0	0	0	0	0	0	0	0	0	0	0	0	0	0	0	0	0	0	0	0	0	0	0	0	0	0	0	0	0	0	0
CSys (ng/mL)	36	8	0	0	0	0	0	0	0	0	0	0	0	0	0	0	0	0	0	0	0	0	0	0	0	0	0	0	0	0	0	0	0	0	0	0	0	0	0	0	0	0	0	0	0	0	0	0	0
CSys (ng/mL)	37	6	0	0	0	0	0	0	0	0	0	0	0	0	0	0	0	0	0	0	0	0	0	0	0	0	0	0	0	0	0	0	0	0	0	0	0	0	0	0	0	0	0	0	0	0	0	0	0
CSys (ng/mL)	38	7	0	0	0	0	0	0	0	0	0	0	0	0	0	0	0	0	0	0	0	0	0	0	0	0	0	0	0	0	0	0	0	0	0	0	0	0	0	0	0	0	0	0	0	0	0	0	0
CSys (ng/mL)	39	1	0	0	0	0	0	0	0	0	0	0	0	0	0	0	0	0	0	0	0	0	0	0	0	0	0	0	0	0	0	0	0	0	0	0	0	0	0	0	0	0	0	0	0	0	0	0	0
CSys (ng/mL)	40	3	0	0	0	0	0	0	0	0	0	0	0	0	0	0	0	0	0	0	0	0	0	0	0	0	0	0	0	0	0	0	0	0	0	0	0	0	0	0	0	0	0	0	0	0	0	0	0
CSys (ng/mL)	41	8	0	0	0	0	0	0	0	0	0	0	0	0	0	0	0	0	0	0	0	0	0	0	0	0	0	0	0	0	0	0	0	0	0	0	0	0	0	0	0	0	0	0	0	0	0	0	0
[truncated: 483 more rows]
[truncated: 153 more columns]

## Sheet: AUC
		CPlasma
[truncated: 147 more rows]

## Sheet: CR Profile
Population Statistics
Time (h)			0	1	4	6	8	10	12	14	24
[truncated: 136 more rows]
